# Supplementary material
Source: PubMed Central journal article supplement (PMC6501835)

Supporting Information  
©Wiley-VCH 2016  
69451 Weinheim, Germany

DOI: 10.1002/anie.2016XXXXX

| Table of Contents                                             | Page |
|---------------------------------------------------------------|------|
| 1. General Information.....                                   | 3    |
| 2. General Procedures for the Dynamic Kinetic Resolution..... | 4    |
| 3. Preparation of Substrates.....                             | 11   |
| 4. Esterification of <b>7a</b> .....                          | 30   |
| 5. Oxidative Decomposition of <b>6a</b> .....                 | 31   |
| 6. Hydroacylation of <b>8</b> .....                           | 31   |
| 7. Deuterium Labeling Experiment.....                         | 32   |
| 8. Kinetic Isotope Effect Experiment.....                     | 32   |
| 9. Gram-scale Dynamic Kinetic Resolution of <b>1a</b> .....   | 33   |
| 10. X-ray Crystallographic Data.....                          | 33   |
| 11. References.....                                           | 53   |
| 12. Ligand and Amine Combinations for Various Aldehydes.....  | 53   |
| 13. NMR spectra.....                                          | 54   |
| 14. SFC spectra.....                                          | 157  |

## 1. General Information

Commercially reagents were purchased from Sigma Aldrich, Strem, Acros Organics, TCI or Alfa Aesar and used without further purification. All experiments were performed in oven-dried or flame-dried glassware under an atmosphere of N<sub>2</sub>. Tetrahydrofuran, diethyl ether, toluene, and dichloromethane were purified using an Innovative Technologies Pure Solv system, degassed by three freeze-pump-thaw cycles, and stored over 3A MS within a N<sub>2</sub> filled glove box. Reactions were monitored either via gas chromatography using an Agilent Technologies 7890A GC system equipped with an Agilent Technologies 5975C inert XL EI/CI MSD or by analytical thin-layer chromatography on EMD Silica Gel 60 F254 plates. Visualization of the developed plates was performed under UV light (254 nm) or using KMnO<sub>4</sub> stain. Purification and isolation of products were performed via silica gel chromatography (both column and preparative thin-layer chromatography). Column chromatography was performed with Silicycle Silia-P Flash Silica Gel using glass columns. <sup>1</sup>H, <sup>13</sup>C, <sup>19</sup>F, and <sup>31</sup>P NMR spectra were recorded on a Bruker DRX-400 (400 MHz <sup>1</sup>H, 100 MHz <sup>13</sup>C, 376.5 MHz <sup>19</sup>F, 162 MHz <sup>31</sup>P), GN-500 (500 MHz <sup>1</sup>H, 125.7 MHz <sup>13</sup>C, 202 MHz <sup>31</sup>P), or CRYO-500 (500 MHz <sup>1</sup>H, 125.7 MHz <sup>13</sup>C) spectrometer. <sup>1</sup>H NMR spectra were internally referenced to the residual solvent signal or TMS. <sup>13</sup>C NMR spectra were internally referenced to the residual solvent signal. Data for <sup>1</sup>H NMR are reported as follows: chemical shift (δ ppm, δ 7.27 for CDCl<sub>3</sub>), multiplicity (s = singlet, d = doublet, t = triplet, q = quartet, m = multiplet, br = broad), coupling constant (Hz), integration. Data for <sup>13</sup>C NMR are reported in terms of chemical shift (δ ppm, δ 77.16 for CDCl<sub>3</sub>). Infrared spectra were obtained on a Thermo Scientific Nicolet iS5 FT-IR spectrometer equipped with an iD5 ATR accessory, and were reported in terms of frequency of absorption (cm<sup>-1</sup>). Enantiomeric excesses for enantioselective reactions were determined by chiral SFC analysis using an Agilent Technologies HPLC (1200 series) system and Aurora A5 Fusion. High-resolution mass spectra (HRMS) were obtained on a micromass 70S-250 spectrometer (EI) or an ABI/Sciex QStar Mass Spectrometer (ESI), performed by the University of California, Irvine Mass Spectrometry Center. X-ray crystallography was performed by the X-ray Crystallography Facility of the University of California, San Diego.

## 2. General Procedures for the Dynamic Kinetic Resolution using Hydroacylation

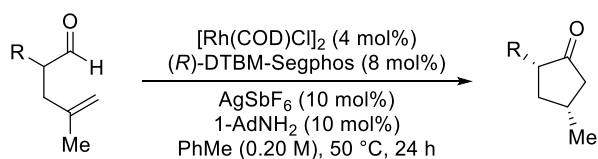

**Method A:** In a N<sub>2</sub>-filled glovebox, [Rh(COD)Cl]<sub>2</sub> (2.0 mg, 0.0040 mmol, 4 mol%), (*R*)-DTBM-Segphos (10.7 mg, 0.0080 mmol, 8 mol%), and toluene (0.50 mL, 0.20 M) were added to a 1 dram vial equipped with a magnetic stir bar. The solution was stirred at 30 °C for 10 min. AgSbF<sub>6</sub> (3.4 mg, 0.010 mmol, 10 mol%), was added, and the resulting mixture was stirred at 30 °C for 30 min. Aldehyde **1** (0.10 mmol, 1.0 equiv) and 1-AdNH<sub>2</sub> (1.5 mg, 0.010 mmol, 10 mol%) were added. The vial was then sealed with a Teflon-lined screw cap and stirred at 50 °C for 24 h. The reaction mixture was cooled to rt, filtered through celite, and concentrated *in vacuo*. The diastereoselectivity was determined by <sup>1</sup>H NMR analysis of the unpurified reaction mixture. The ketone **2** was purified using preparative thin-layer chromatography.

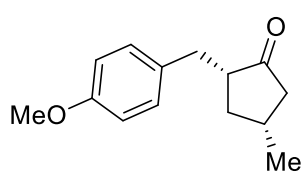

**(2*R*,4*R*)-2-(4-methoxybenzyl)-4-methylcyclopentan-1-one (2a):** The title compound was synthesized according to Method A and isolated by preparatory TLC (5% EtOAc in hexanes) as a white solid (20.5 mg, 94% yield, >20:1 *dr*, >99% *ee*, [α]<sub>D</sub><sup>24</sup> = +151 (c 0.52, CHCl<sub>3</sub>). <sup>1</sup>H NMR (400 MHz, CDCl<sub>3</sub>) δ 7.08 (d, *J* = 8.5 Hz, 2H), 6.82 (d, *J* = 8.5 Hz, 2H), 3.79 (s, 3H), 3.11 (dd, *J* = 13.8, 4.0 Hz, 1H), 2.56 – 2.45 (m, 2H), 2.40 (dtd, *J* = 12.4, 8.1, 4.1 Hz, 1H), 2.21 – 2.03 (m, 2H), 1.71 (dd, *J* = 18.4, 11.3 Hz, 1H), 1.21 – 1.11 (m, 1H), 1.10 (d, *J* = 6.3 Hz, 3H). <sup>13</sup>C NMR (101 MHz, CDCl<sub>3</sub>) δ 219.8, 158.2, 132.2, 129.9, 114.0, 55.4, 53.1, 47.0, 38.3, 34.8, 29.7, 20.4. IR (ATR): 2952, 2934, 1721, 1610, 1319, 1181, 1037, 711 cm<sup>-1</sup>. HRMS calculated for C<sub>14</sub>H<sub>18</sub>O<sub>2</sub>Na [M+Na]<sup>+</sup> 241.1205, found 241.1204. Chiral SFC: 100 mm CHIRALPAK AD-H, 1% *i*-PrOH, 2.0 mL/min, 220 nm, 44 °C, nozzle pressure = 200 bar CO<sub>2</sub>, *t*<sub>R1</sub> (major) = 6.1 min, *t*<sub>R2</sub> (minor) = 8.3 min.

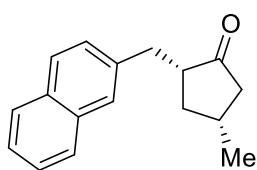

**(2*R*,4*R*)-4-methyl-2-(naphthalen-2-ylmethyl)cyclopentan-1-one (2b):** The title compound was synthesized according to Method A and isolated by preparatory TLC (5% EtOAc in hexanes) as a white solid (21.9 mg, 94% yield, >20:1 *dr*, 93% *ee*, [α]<sub>D</sub><sup>24</sup> = +206 (c 0.93, CHCl<sub>3</sub>). <sup>1</sup>H NMR (400 MHz, CDCl<sub>3</sub>) δ 7.85 – 7.73 (m, 3H), 7.62 (s, 1H), 7.50 – 7.40 (m, 2H), 7.31 (dd, *J* = 8.4, 1.4 Hz, 1H), 3.36 (dd, *J* = 13.8, 4.1 Hz, 1H), 2.72 (dd, *J* = 13.8, 9.5 Hz, 1H), 2.54 (ddd, *J* = 12.6, 9.1, 6.4 Hz, 2H), 2.21 – 2.05 (m, 2H), 1.76 (dd, *J* = 18.6, 11.3 Hz, 1H), 1.21 (q, *J* = 11.7 Hz, 1H), 1.10 (d, *J* = 6.3 Hz, 3H). <sup>13</sup>C NMR (101 MHz, CDCl<sub>3</sub>) δ 219.6, 137.8, 133.7, 132.3, 128.2, 127.8, 127.59, 127.55, 127.2, 126.1, 125.5, 52.9, 46.9, 38.4, 35.9, 29.7, 20.3. IR (ATR): 2953, 1734, 1507, 1153, 775 cm<sup>-1</sup>. HRMS calculated for C<sub>17</sub>H<sub>18</sub>ONa [M+Na]<sup>+</sup> 261.1255, found 261.1255. Chiral SFC: 100 mm CHIRALPAK AD-H, 0.5% *i*-PrOH, 2.5 mL/min, 220 nm, 44 °C, nozzle pressure = 200 bar CO<sub>2</sub>, *t*<sub>R1</sub> (major) = 9.2 min, *t*<sub>R2</sub> (minor) = 11.5 min.

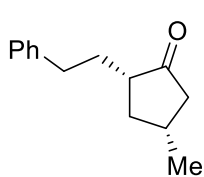

**(2*S*,4*R*)-4-methyl-2-phenethylcyclopentan-1-one (2c):** The title compound was synthesized according to Method A and isolated by preparatory TLC (5% EtOAc in hexanes) as a colorless oil (20.7 mg, 86% yield, >20:1 *dr*, 93% *ee*, [α]<sub>D</sub><sup>24</sup> = +114 (c 0.41, CHCl<sub>3</sub>). <sup>1</sup>H NMR (400 MHz, CDCl<sub>3</sub>) δ 7.32 – 7.25 (m, 2H), 7.19 (dd, *J* = 10.2, 4.3 Hz, 3H), 2.79 – 2.69 (m, 1H), 2.69 – 2.58 (m, 1H), 2.46 (dd, *J* = 18.3, 7.4 Hz, 1H), 2.41 – 2.30 (m, 1H), 2.22 – 2.05 (m, 3H), 1.76 (dd, *J* = 18.4, 11.6 Hz, 1H), 1.65 – 1.51 (m, 1H), 1.23 – 1.10 (m, 4H). <sup>13</sup>C NMR (101 MHz, CDCl<sub>3</sub>) δ 220.8, 141.8, 128.6, 128.5, 126.1, 50.3, 47.0, 38.8, 33.8, 31.6, 29.8, 20.5. IR (ATR): 2951, 2924, 1733, 1603, 1454, 906 cm<sup>-1</sup>. HRMS calculated for C<sub>14</sub>H<sub>18</sub>ONa [M+Na]<sup>+</sup> 225.1255, found 225.1250. Chiral SFC: 100 mm CHIRALPAK AD-H, 0% *i*-PrOH, 2.0 mL/min, 220 nm, 44 °C, nozzle pressure = 200 bar CO<sub>2</sub>, *t*<sub>R1</sub> (minor) = 7.8 min, *t*<sub>R2</sub> (major) = 8.6 min.

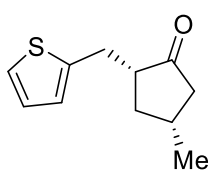

**(2*R*,4*R*)-4-methyl-2-(thiophen-2-ylmethyl)cyclopentan-1-one (2d):** The title compound was synthesized according to Method A and isolated by preparatory TLC (5% EtOAc in hexanes) as a colorless oil (18.3 mg, 94% yield, >20:1 *dr*, 93% *ee*, [α]<sub>D</sub><sup>24</sup> = +173 (c 0.58, CHCl<sub>3</sub>). <sup>1</sup>H NMR (400 MHz, CDCl<sub>3</sub>) δ 7.13 (dd, *J* = 5.1, 1.2 Hz, 1H), 6.92 (dd, *J* = 5.1, 3.4 Hz, 1H), 6.82 – 6.77 (m, 1H), 3.34 (dd, *J* = 15.0, 4.0 Hz, 1H), 2.84 (dd, *J* = 15.0, 8.9 Hz, 1H), 2.56 – 2.40 (m, 2H), 2.34 – 2.24 (m, 1H), 2.21 – 2.07 (m, 1H), 1.74 (dd, *J* = 18.5, 11.5 Hz, 1H), 1.26 – 1.16 (m, 1H), 1.12 (d, *J* = 6.5 Hz, 3H). <sup>13</sup>C NMR (101 MHz, CDCl<sub>3</sub>) δ 219.1, 142.4, 126.9, 125.5, 123.7, 52.9, 46.9, 38.2,

29.8, 29.6, 20.3. **IR** (ATR): 2953, 1736, 1455, 1437, 1245, 1154, 849  $\text{cm}^{-1}$ . **HRMS** calculated for  $\text{C}_{11}\text{H}_{14}\text{OSNa}$   $[\text{M}+\text{Na}]^+$  217.0663, found 217.0658. **Chiral SFC**: 100 mm CHIRALPAK AD-H, 1% *i*-PrOH, 2.0 mL/min, 220 nm, 44 °C, nozzle pressure = 200 bar  $\text{CO}_2$ ,  $t_{\text{R}1}$  (major) = 5.1 min,  $t_{\text{R}2}$  (minor) = 6.2 min.

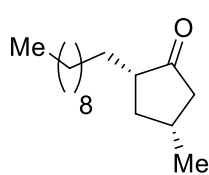

**(2S,4R)-2-decyl-4-methylcyclopentan-1-one (2e)**: The title compound was synthesized according to Method A at 60 °C and isolated by preparatory TLC (5% EtOAc in hexanes) as a colorless oil (15.4 mg, 65% yield, >20:1 *dr*, 96% *ee*,  $[\alpha]_{\text{D}}^{24} = +99$  (c 1.0,  $\text{CHCl}_3$ )).  **$^1\text{H NMR}$**  (400 MHz,  $\text{CDCl}_3$ )  $\delta$  2.46 (dd,  $J = 18.4, 7.4$  Hz, 1H), 2.36 – 2.26 (m, 1H), 2.13 (qd,  $J = 12.4, 6.4$  Hz, 2H), 1.76 (ddd,  $J = 24.5, 14.9, 8.1$  Hz, 2H), 1.26 (s, 17H), 1.12 (dd,  $J = 11.6, 9.3$  Hz, 4H), 0.89 (t,  $J = 6.8$  Hz, 3H).  **$^{13}\text{C NMR}$**  (126 MHz,  $\text{CDCl}_3$ )  $\delta$  221.3, 51.1, 47.0, 38.8,

32.1, 29.9, 29.84, 29.75, 29.7, 29.6, 29.5, 27.7, 22.8, 20.5, 14.3. **IR** (ATR): 2953, 2922, 2852, 1739, 1456, 1155, 720  $\text{cm}^{-1}$ . **HRMS** calculated for  $\text{C}_{16}\text{H}_{30}\text{ONa}$   $[\text{M}+\text{Na}]^+$  261.2194, found 261.2184. **Chiral SFC** (of the corresponding tertiary alcohol after treatment with  $\text{PhMgBr}$ ): 100 mm CHIRALPAK AD-H, 2% *i*-PrOH, 2.0 mL/min, 220 nm, 44 °C, nozzle pressure = 200 bar  $\text{CO}_2$ ,  $t_{\text{R}1}$  (minor) = 10.5 min,  $t_{\text{R}2}$  (major) = 12.0 min.

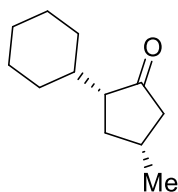

**(2R,4R)-2-cyclohexyl-4-methylcyclopentan-1-one (2f)**: The title compound was synthesized according to Method A at 60 °C and isolated by preparatory TLC (5% EtOAc in hexanes) as a colorless oil (11.4 mg, 63% yield, >20:1 *dr*, >99% *ee*,  $[\alpha]_{\text{D}}^{24} = +80$  (c 0.94,  $\text{CHCl}_3$ )).  **$^1\text{H NMR}$**  (400 MHz,  $\text{CDCl}_3$ )  $\delta$  2.50 – 2.36 (m, 1H), 2.18 – 1.99 (m, 3H), 1.86 – 1.56 (m, 6H), 1.47 – 1.36 (m, 1H), 1.35 – 1.19 (m, 3H), 1.18 – 1.00 (m, 6H).  **$^{13}\text{C NMR}$**  (101 MHz,  $\text{CDCl}_3$ )  $\delta$  220.8, 56.6, 48.2, 37.5, 34.4, 31.9, 29.7, 28.9, 26.7, 26.52, 26.48, 20.4. **IR** (ATR): 2922, 2851, 1733, 1449, 1152, 1076, 892  $\text{cm}^{-1}$ . **HRMS** calculated for  $\text{C}_{12}\text{H}_{20}\text{OH}$   $[\text{M}+\text{H}]^+$  181.1592, found 181.1598. **Chiral**

**SFC** (of the corresponding tertiary alcohol after treatment with  $\text{PhMgBr}$ ): 100 mm CHIRALPAK AD-H, 1% *i*-PrOH, 2.0 mL/min, 220 nm, 44 °C, nozzle pressure = 200 bar  $\text{CO}_2$ ,  $t_{\text{R}1}$  (minor) = 14.2 min,  $t_{\text{R}2}$  (major) = 18.2 min.

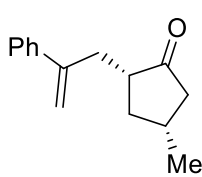

**(2R,4R)-4-methyl-2-(2-phenylallyl)cyclopentan-1-one (2g)**: The title compound was synthesized according to Method A and isolated by preparatory TLC (5% EtOAc in hexanes) as a colorless oil (16.5 mg, 69% yield, >20:1 *dr*, 94% *ee*,  $[\alpha]_{\text{D}}^{24} = +85$  (c 0.67,  $\text{CHCl}_3$ )).  **$^1\text{H NMR}$**  (400 MHz,  $\text{CDCl}_3$ )  $\delta$  7.41 (d,  $J = 7.3$  Hz, 2H), 7.33 (t,  $J = 7.2$  Hz, 2H), 7.31 – 7.24 (m, 1H), 5.28 (s, 1H), 5.09 (s, 1H), 3.34 – 3.20 (m, 1H), 2.45 (dd,  $J = 18.3, 7.2$  Hz, 1H), 2.31 – 2.10 (m, 3H), 2.04 (ddt,  $J = 18.1, 12.2, 6.2$  Hz, 1H), 1.74 (dd,  $J = 18.4, 11.5$  Hz, 1H), 1.16

– 0.99 (m, 4H).  **$^{13}\text{C NMR}$**  (101 MHz,  $\text{CDCl}_3$ )  $\delta$  220.2, 146.8, 140.4, 128.5, 127.8, 126.4, 113.8, 49.7, 46.8, 38.7, 36.2, 29.6, 20.4. **IR** (ATR): 2953, 1734, 1627, 1494, 1454, 1155  $\text{cm}^{-1}$ . **HRMS** calculated for  $\text{C}_{15}\text{H}_{18}\text{ONa}$   $[\text{M}+\text{Na}]^+$  237.1255, found 237.1256. **Chiral SFC**: 250 mm CHIRALPAK AD, 1% *i*-PrOH, 2.5 mL/min, 220 nm, 44 °C, nozzle pressure = 200 bar  $\text{CO}_2$ ,  $t_{\text{R}1}$  (minor) = 9.4 min,  $t_{\text{R}2}$  (major) = 10.4 min.

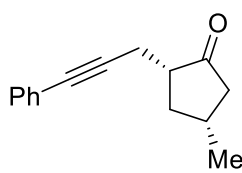

**(2R,4R)-4-methyl-2-(3-phenylprop-2-yn-1-yl)cyclopentan-1-one (2h)**: The title compound was synthesized according to Method A at 60 °C and isolated by preparatory TLC (5% EtOAc in hexanes) as a colorless oil (14.5 mg, 68% yield, 11:1 *dr*, 95% *ee*,  $[\alpha]_{\text{D}}^{24} = +212$  (c 0.81,  $\text{CHCl}_3$ )).  **$^1\text{H NMR}$**  (400 MHz,  $\text{CDCl}_3$ )  $\delta$  7.38 (d,  $J = 5.0$  Hz, 2H), 7.28 (dd,  $J = 4.5, 2.3$  Hz, 3H), 2.80 (dd,  $J = 16.8, 3.3$  Hz, 1H), 2.63 – 2.36 (m, 4H), 2.21 (dt,  $J = 18.1, 5.9$  Hz, 1H), 1.78 (dd,  $J = 18.4, 11.6$  Hz, 1H), 1.49 (q,  $J = 15.1$  Hz, 1H),

1.19 (d,  $J = 6.4$  Hz, 3H).  **$^{13}\text{C NMR}$**  (101 MHz,  $\text{CDCl}_3$ )  $\delta$  218.5, 131.7, 128.3, 127.9, 123.8, 87.5, 81.9, 49.8, 46.9, 37.8, 29.6, 20.4, 19.7. **IR** (ATR): 2954, 1738, 1498, 1455, 1339, 1156, 911  $\text{cm}^{-1}$ . **HRMS** calculated for  $\text{C}_{15}\text{H}_{16}\text{ONa}$   $[\text{M}+\text{Na}]^+$  235.1099, found 235.1092. **Chiral SFC**: 100 mm CHIRALPAK AD-H, 1% *i*-PrOH, 3.0 mL/min, 220 nm, 44 °C, nozzle pressure = 200 bar  $\text{CO}_2$ ,  $t_{\text{R}1}$  (major) = 4.4 min,  $t_{\text{R}2}$  (minor) = 5.3 min.

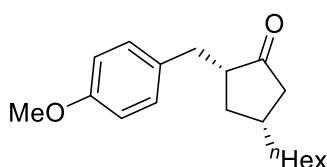

**(2R,4R)-4-hexyl-2-(4-methoxybenzyl)cyclopentan-1-one (2i)**: The title compound was synthesized according to Method A and isolated by preparatory TLC (5% EtOAc in hexanes) as a yellow oil (18.9 mg, 66% yield, >20:1 *dr*, >99% *ee*,  $[\alpha]_{\text{D}}^{24} = +82$  (c 1.2,  $\text{CHCl}_3$ )).  **$^1\text{H NMR}$**  (500 MHz,  $\text{CDCl}_3$ )  $\delta$  7.08 (d,  $J = 8.3$  Hz, 2H), 6.83 (d,  $J = 8.5$  Hz, 2H), 3.79 (s, 3H), 3.11 (dd,  $J = 13.9, 3.7$  Hz,

1H), 2.49 (dd,  $J = 14.3, 9.3$  Hz, 2H), 2.38 (d,  $J = 9.1$  Hz, 1H), 2.23 – 2.12 (m, 1H), 2.06 – 1.92 (m, 1H), 1.72 (dd,  $J = 18.5, 11.6$  Hz, 1H), 1.38 (s, 2H), 1.27 (s, 8H), 1.14 (q,  $J = 12.1$  Hz, 1H), 0.88 (t,  $J = 6.3$  Hz, 3H).  $^{13}\text{C NMR}$  (126 MHz,  $\text{CDCl}_3$ )  $\delta$  219.7, 158.1, 132.2, 129.9, 113.9, 55.4, 52.6, 45.6, 36.3, 36.0, 35.0, 34.8, 31.9, 29.5, 27.9, 22.8, 14.2. **IR** (ATR): 2954, 2922, 2853, 1737, 1611, 1512, 1464, 1245, 1176, 1036  $\text{cm}^{-1}$ . **HRMS** calculated for  $\text{C}_{19}\text{H}_{26}\text{O}_2\text{Na}$   $[\text{M}+\text{Na}]^+$  311.1987, found 311.1980. **Chiral SFC**: 100 mm CHIRALPAK AD-H, 2% *i*-PrOH, 2.5 mL/min, 220 nm, 44 °C, nozzle pressure = 200 bar  $\text{CO}_2$ ,  $t_{\text{R}1}$  (major) = 6.2 min,  $t_{\text{R}2}$  (minor) = 11.9 min.

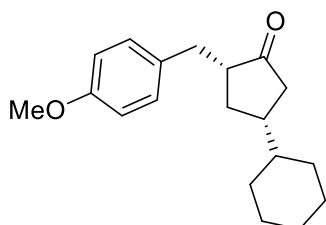

**(2R,4R)-4-cyclohexyl-2-(4-methoxybenzyl)cyclopentan-1-one (2j)**: The title compound was synthesized according to Method A at 60 °C using (*R,S*)-JoSPOphos and isolated by preparatory TLC (5% EtOAc in hexanes) as a colorless oil (25.5 mg, 89% yield, >20:1 *dr*, >99% *ee*,  $[\alpha]_{\text{D}}^{24} = +46$  (c 0.39,  $\text{CHCl}_3$ )).  $^1\text{H NMR}$  (400 MHz,  $\text{CDCl}_3$ )  $\delta$  7.08 (d,  $J = 8.6$  Hz, 2H), 6.83 (d,  $J = 8.6$  Hz, 2H), 3.79 (s, 3H), 3.12 (dd,  $J = 13.9, 4.0$  Hz, 1H), 2.48 (dt,  $J = 21.9, 11.0$  Hz, 2H), 2.41 – 2.27 (m, 1H), 2.24 – 2.12 (m, 1H), 1.83 – 1.59 (m, 7H), 1.28 – 1.05 (m, 5H), 1.00 – 0.79 (m, 2H).  $^{13}\text{C NMR}$  (101 MHz,  $\text{CDCl}_3$ )  $\delta$  219.6, 158.1, 132.2, 129.9, 114.0, 55.4, 52.7, 43.7, 43.6, 40.9, 34.8, 34.1,

32.0, 31.0, 26.6, 26.3, 26.2. **IR** (ATR): 2921, 2849, 1735, 1611, 1511, 1448, 1245, 1176, 1035, 831  $\text{cm}^{-1}$ . **HRMS** calculated for  $\text{C}_{19}\text{H}_{26}\text{O}_2\text{H}$   $[\text{M}+\text{H}]^+$  287.2011, found 287.1998. **Chiral SFC**: 100 mm CHIRALPAK AD-H, 2% *i*-PrOH, 2.0 mL/min, 220 nm, 44 °C, nozzle pressure = 200 bar  $\text{CO}_2$ ,  $t_{\text{R}1}$  (major) = 11.9 min,  $t_{\text{R}2}$  (minor) = 19.3 min.

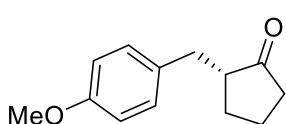

**(R)-2-(4-methoxybenzyl)cyclopentan-1-one (2k)**: The title compound was synthesized according to Method A and isolated by preparatory TLC (5% EtOAc in hexanes) as a colorless oil (10.6 mg, 52% yield, 82% *ee*,  $[\alpha]_{\text{D}}^{24} = +107$  (c 0.48,  $\text{CHCl}_3$ )).  $^1\text{H NMR}$  (500 MHz,  $\text{CDCl}_3$ )  $\delta$  7.09 (d,  $J = 8.3$  Hz, 2H), 6.83 (d,  $J = 8.5$  Hz, 2H), 3.79 (s, 3H), 3.07 (dd,  $J = 14.0, 3.7$  Hz, 1H), 2.53 (dd,  $J = 13.9, 9.3$  Hz, 1H),

2.38 – 2.26 (m, 2H), 2.16 – 2.04 (m, 2H), 1.95 (d,  $J = 6.5$  Hz, 1H), 1.79 – 1.67 (m, 1H), 1.57 (dd,  $J = 15.5, 7.5$  Hz, 1H).  $^{13}\text{C NMR}$  (101 MHz,  $\text{CDCl}_3$ )  $\delta$  220.5, 158.2, 132.1, 130.0, 114.0, 55.4, 51.3, 38.4, 34.8, 29.2, 20.7. **IR** (ATR): 2957, 1734, 1610, 1510, 1243, 1177  $\text{cm}^{-1}$ . **HRMS** calculated for  $\text{C}_{13}\text{H}_{16}\text{O}_2\text{Na}$   $[\text{M}+\text{Na}]^+$  227.1048, found 227.1042. **Chiral SFC**: 100 mm CHIRALPAK AD-H, 1% *i*-PrOH, 2.0 mL/min, 220 nm, 44 °C, nozzle pressure = 200 bar  $\text{CO}_2$ ,  $t_{\text{R}1}$  (major) = 6.4 min,  $t_{\text{R}2}$  (minor) = 7.8 min.

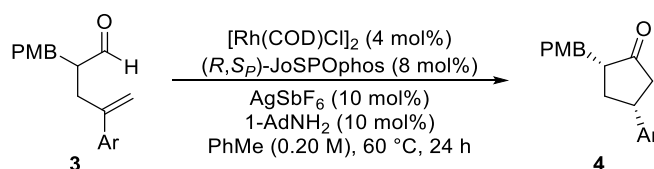

**Method B**: In a  $\text{N}_2$ -filled glovebox,  $[\text{Rh}(\text{COD})\text{Cl}]_2$  (2.0 mg, 0.0040 mmol, 4 mol%), (*R,S*)-JoSPOphos (4.4 mg, 0.0080 mmol, 8 mol%), and toluene (0.50 mL, 0.20 M) were added to a 1 dram vial equipped with a magnetic stir bar. The solution was stirred at 30 °C for 10 min.  $\text{AgSbF}_6$  (3.4 mg, 0.010 mmol, 10 mol%), was added, and the resulting mixture was stirred at 30 °C for 30 min. Aldehyde **3** (0.10 mmol, 1.0 equiv) and 1-AdNH<sub>2</sub> (1.5 mg, 0.010 mmol, 10 mol%) were added. The vial was then sealed with a Teflon-lined screw cap and stirred at 60 °C for 24 h. The reaction mixture was cooled to rt, filtered through celite, and concentrated *in vacuo*. The diastereoselectivity was determined by  $^1\text{H NMR}$  analysis of the unpurified reaction mixture. The ketone **4** was purified using preparative thin-layer chromatography.

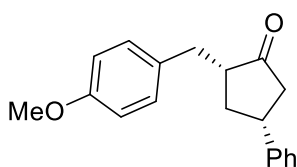

**(2R,4R)-2-(4-methoxybenzyl)-4-phenylcyclopentan-1-one (4a)**: The title compound was synthesized according to Method B and isolated by preparatory TLC (5% EtOAc in hexanes) as a white solid (21.3 mg, 76% yield, >20:1 *dr*, >99% *ee*,  $[\alpha]_{\text{D}}^{24} = +60.3$  (c 1.0,  $\text{CHCl}_3$ )).  $^1\text{H NMR}$  (400 MHz,  $\text{CDCl}_3$ )  $\delta$  7.33 (t,  $J = 7.4$  Hz, 2H), 7.27 – 7.18 (m, 3H), 7.11 (d,  $J = 8.6$  Hz, 2H), 6.84 (d,  $J = 8.7$  Hz, 2H), 3.80 (s, 3H), 3.35 – 3.23 (m, 1H), 3.19 (dd,  $J = 13.1, 3.2$  Hz, 1H), 2.79 (dd,  $J = 19.0, 7.1$  Hz,

1H), 2.67 – 2.51 (m, 2H), 2.46 (ddd,  $J = 12.9, 7.7, 2.2$  Hz, 1H), 2.30 (dd,  $J = 18.5, 12.2$  Hz, 1H), 1.69 (q,  $J = 12.1$  Hz, 1H).  $^{13}\text{C NMR}$  (101 MHz,  $\text{CDCl}_3$ )  $\delta$  218.2, 158.3, 143.0, 131.9, 130.0, 128.8, 126.84, 126.83, 114.1, 55.4, 53.0, 45.9, 40.1, 37.7, 34.8. **IR** (ATR): 2921, 1724, 1608, 1510, 1441, 1242, 1028, 811, 758, 699  $\text{cm}^{-1}$ . **HRMS** calculated for  $\text{C}_{19}\text{H}_{20}\text{O}_2\text{Na}$   $[\text{M}+\text{Na}]^+$  303.1361, found 303.1375. **Chiral SFC**: 100 mm CHIRALCEL OJ-H, 8% *i*-PrOH, 2.0 mL/min, 220 nm, 44 °C, nozzle pressure = 200 bar  $\text{CO}_2$ ,  $t_{\text{R}1} = 7.6$  min,  $t_{\text{R}2} = 9.2$  min,  $t_{\text{R}3}$  (major) = 10.7 min,  $t_{\text{R}4}$  (minor) = 12.0 min.

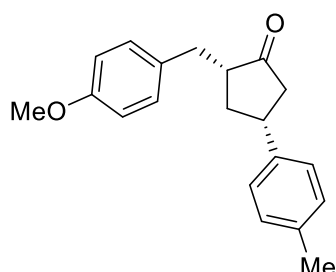

**(2R,4R)-2-(4-methoxybenzyl)-4-(p-tolyl)cyclopentan-1-one (4b)**: The title compound was synthesized according to Method B and isolated by preparatory TLC (5% EtOAc in hexanes) as a white solid (26.5 mg, 90% yield, >20:1 *dr*, 95% *ee*,  $[\alpha]_{\text{D}}^{24} = +67.8$  ( $c$  1.6,  $\text{CHCl}_3$ )).  $^1\text{H NMR}$  (400 MHz,  $\text{CDCl}_3$ )  $\delta$  7.13 (dd,  $J = 15.5, 8.3$  Hz, 6H), 6.84 (d,  $J = 8.5$  Hz, 2H), 3.80 (s, 3H), 3.27 (dt,  $J = 11.9, 6.3$  Hz, 1H), 3.18 (dt,  $J = 11.2, 5.7$  Hz, 1H), 2.77 (dd,  $J = 18.5, 7.5$  Hz, 1H), 2.67 – 2.51 (m, 2H), 2.44 (dt,  $J = 11.9, 3.8$  Hz, 1H), 2.34 (s, 3H), 2.28 (dd,  $J = 18.5, 12.2$  Hz, 1H), 1.66 (q,  $J = 12.0$  Hz, 1H).  $^{13}\text{C NMR}$  (101 MHz,  $\text{CDCl}_3$ )  $\delta$  218.3, 158.2, 140.0, 136.4, 131.9, 130.0, 129.4, 126.7, 114.0, 55.4, 53.0, 46.0, 39.7, 37.8, 34.8, 21.1. **IR** (ATR): 2923, 1721, 1608, 1510, 1440, 1242, 1170, 1031, 828, 811  $\text{cm}^{-1}$ . **HRMS** calculated for  $\text{C}_{20}\text{H}_{22}\text{O}_2\text{Na}$   $[\text{M}+\text{Na}]^+$  317.1518, found 317.1511. **Chiral SFC**: 100 mm CHIRALCEL OJ-H, 5% *i*-PrOH, 2.0 mL/min, 220 nm, 44 °C, nozzle pressure = 200 bar  $\text{CO}_2$ ,  $t_{\text{R}1} = 6.9$  min,  $t_{\text{R}2} = 9.5$  min,  $t_{\text{R}3}$  (major) = 10.7 min,  $t_{\text{R}4}$  (minor) = 12.2 min.

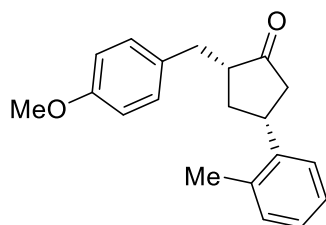

**(2R,4R)-2-(4-methoxybenzyl)-4-(o-tolyl)cyclopentan-1-one (4c)**: The title compound was synthesized according to Method B and isolated by preparatory TLC (5% EtOAc in hexanes) as a colorless oil (22.5 mg, 80% yield, >20:1 *dr*, >99% *ee*,  $[\alpha]_{\text{D}}^{24} = +44.3$  ( $c$  1.4,  $\text{CHCl}_3$ )).  $^1\text{H NMR}$  (400 MHz,  $\text{CDCl}_3$ )  $\delta$  7.23 – 7.14 (m, 4H), 7.11 (d,  $J = 8.4$  Hz, 2H), 6.84 (d,  $J = 8.4$  Hz, 2H), 3.80 (s, 3H), 3.54 – 3.40 (m, 1H), 3.21 (dd,  $J = 13.3, 3.3$  Hz, 1H), 2.75 (dd,  $J = 18.5, 7.3$  Hz, 1H), 2.68 – 2.53 (m, 2H), 2.41 – 2.31 (m, 4H), 2.26 (dd,  $J = 18.5, 12.2$  Hz, 1H), 1.72 (q,  $J = 12.1$  Hz, 1H).  $^{13}\text{C NMR}$  (101 MHz,  $\text{CDCl}_3$ )  $\delta$  218.3, 158.2, 140.8, 136.1, 131.9, 130.7, 130.0, 126.58, 126.56, 124.9, 114.0, 55.4, 52.9, 45.6, 36.7, 36.3, 34.9, 19.8. **IR** (ATR): 2931, 1736, 1611, 1511, 1441, 1243, 1176, 1033, 835, 755  $\text{cm}^{-1}$ . **HRMS** calculated for  $\text{C}_{20}\text{H}_{22}\text{O}_2\text{Na}$   $[\text{M}+\text{Na}]^+$  317.1518, found 317.1514. **Chiral SFC**: 100 mm CHIRALCEL OJ-H, 5% *i*-PrOH, 2.0 mL/min, 220 nm, 44 °C, nozzle pressure = 200 bar  $\text{CO}_2$ ,  $t_{\text{R}1} = 6.3$  min,  $t_{\text{R}2} = 6.6$  min,  $t_{\text{R}3}$  (major) = 8.3 min,  $t_{\text{R}4}$  (minor) = 12.5 min.

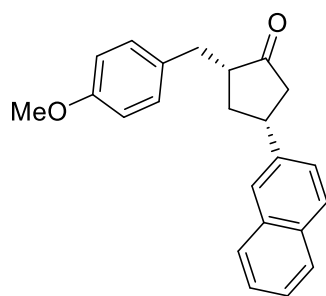

**(2R,4R)-2-(4-methoxybenzyl)-4-(naphthalen-2-yl)cyclopentan-1-one (4d)**: The title compound was synthesized according to Method B and isolated by preparatory TLC (5% EtOAc in hexanes) as a colorless oil (29.1 mg, 88% yield, >20:1 *dr*, 96% *ee*,  $[\alpha]_{\text{D}}^{24} = +65.0$  ( $c$  1.8,  $\text{CHCl}_3$ )).  $^1\text{H NMR}$  (400 MHz,  $\text{CDCl}_3$ )  $\delta$  7.81 (t,  $J = 7.9$  Hz, 3H), 7.64 (s, 1H), 7.52 – 7.42 (m, 2H), 7.34 (dd,  $J = 8.5, 1.4$  Hz, 1H), 7.13 (d,  $J = 8.5$  Hz, 2H), 6.85 (d,  $J = 8.5$  Hz, 2H), 3.80 (s, 3H), 3.54 – 3.37 (m, 1H), 3.29 – 3.14 (m, 1H), 2.87 (dd,  $J = 18.9, 7.2$  Hz, 1H), 2.72 – 2.59 (m, 2H), 2.59 – 2.48 (m, 1H), 2.41 (dd,  $J = 18.5, 12.2$  Hz, 1H), 1.79 (q,  $J = 11.8$  Hz, 1H).  $^{13}\text{C NMR}$  (101 MHz,  $\text{CDCl}_3$ )  $\delta$  218.1, 158.3, 140.4, 133.6, 132.5, 131.9, 130.0, 128.5, 127.8, 127.7, 126.4, 125.8, 125.4, 125.0, 114.1, 55.4, 53.0, 45.9, 40.2, 37.6, 34.8. **IR** (ATR): 2930, 1736, 1610, 1511, 1300, 1243, 1177, 1033, 853, 817  $\text{cm}^{-1}$ . **HRMS** calculated for  $\text{C}_{23}\text{H}_{22}\text{O}_2\text{Na}$   $[\text{M}+\text{Na}]^+$  353.1518, found 353.1534. **Chiral SFC**: 100 mm CHIRALCEL OJ-H, 7% *i*-PrOH, 2.0 mL/min, 220 nm, 44 °C, nozzle pressure = 200 bar  $\text{CO}_2$ ,  $t_{\text{R}1} = 29.5$  min,  $t_{\text{R}2} = 49.4$  min,  $t_{\text{R}3}$  (major) = 56.5 min,  $t_{\text{R}4}$  (minor) = 64.8 min.

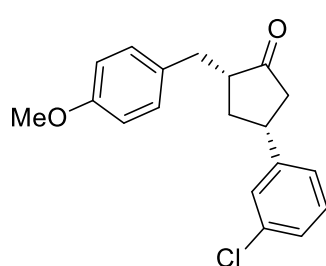

**(2R,4R)-4-(3-chlorophenyl)-2-(4-methoxybenzyl)cyclopentan-1-one (4e)**: The title compound was synthesized according to Method B and isolated by preparatory TLC (5% EtOAc in hexanes) as a colorless oil (23.9 mg, 77% yield, >20:1 *dr*, 94% *ee*,  $[\alpha]_{\text{D}}^{24} = +93.7$  ( $c$  1.4,  $\text{CHCl}_3$ )).  $^1\text{H NMR}$  (400 MHz,  $\text{CDCl}_3$ )  $\delta$  7.28 – 7.17 (m, 3H), 7.09 (t,  $J = 7.8$  Hz, 3H), 6.84 (d,  $J = 8.5$  Hz, 2H), 3.79 (s, 3H), 3.32 – 3.14 (m, 2H), 2.78 (dd,  $J = 18.5, 7.4$  Hz, 1H), 2.58 (ddt,  $J = 12.4, 9.0, 6.3$  Hz, 2H), 2.49 – 2.39 (m, 1H), 2.25 (dd,  $J = 18.5, 12.2$  Hz, 1H), 1.65 (q,  $J = 12.0$  Hz, 1H).  $^{13}\text{C NMR}$  (101 MHz,

$\text{CDCl}_3$ )  $\delta$  217.3, 158.3, 145.1, 134.6, 131.7, 130.02, 129.96, 127.1, 127.0, 125.1, 114.1, 55.4, 52.8, 45.7, 39.8, 37.4, 34.7. **IR** (ATR): 2931, 1737, 1597, 1511, 1243, 1176, 1033, 832, 784, 692  $\text{cm}^{-1}$ . **HRMS** calculated for  $\text{C}_{19}\text{H}_{19}\text{ClO}_2\text{Na}$   $[\text{M}+\text{Na}]^+$  337.0971, found 337.0977. **Chiral SFC**: 100 mm CHIRALCEL OJ-H, 7% *i*-PrOH, 2.0 mL/min, 220 nm, 44 °C, nozzle pressure = 200 bar  $\text{CO}_2$ ,  $t_{\text{R}1}$  = 5.2 min,  $t_{\text{R}2}$  = 6.0 min,  $t_{\text{R}3}$  (major) = 6.3 min,  $t_{\text{R}4}$  (minor) = 7.3 min.

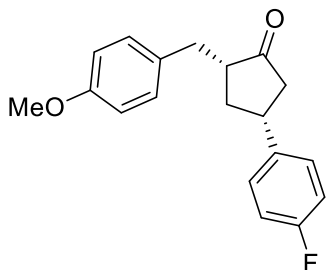

**(2R,4R)-4-(4-fluorophenyl)-2-(4-methoxybenzyl)cyclopentan-1-one (4f)**: The title compound was synthesized according to Method B and isolated by preparatory TLC (5% EtOAc in hexanes) as a colorless oil (27.2 mg, 91% yield, >20:1 *dr*, >99% *ee*,  $[\alpha]_{\text{D}}^{24} = +86.7$  (*c* 1.6,  $\text{CHCl}_3$ )).  **$^1\text{H NMR}$**  (400 MHz,  $\text{CDCl}_3$ )  $\delta$  7.16 (dd, *J* = 8.4, 5.4 Hz, 2H), 7.10 (d, *J* = 8.5 Hz, 2H), 7.00 (t, *J* = 8.6 Hz, 2H), 6.84 (d, *J* = 8.5 Hz, 2H), 3.79 (s, 3H), 3.27 (ddd, *J* = 18.9, 12.5, 6.6 Hz, 1H), 3.21 – 3.11 (m, 1H), 2.78 (dd, *J* = 18.7, 7.5 Hz, 1H), 2.67 – 2.50 (m, 2H), 2.43 (dt, *J* = 10.7, 5.4 Hz, 1H), 2.24 (dd, *J* = 18.5, 12.2 Hz, 1H), 1.69 – 1.57 (m, 1H).  **$^{13}\text{C NMR}$**  (101 MHz,  $\text{CDCl}_3$ )  $\delta$  217.8, 161.7 (d, *J* = 244.9 Hz), 158.3, 138.64 (d, *J* = 3.1 Hz), 131.7, 130.0, 128.3 (d, *J* = 7.8 Hz), 115.5 (d, *J* = 21.2 Hz),

114.1, 55.4, 52.9, 46.1, 39.4, 37.7, 34.7.  **$^{19}\text{F NMR}$**  (376 MHz,  $\text{CDCl}_3$ )  $\delta$  -116.5. **IR** (ATR): 2919, 1737, 1609, 1510, 1243, 1221, 1177, 1149, 1033, 865  $\text{cm}^{-1}$ . **HRMS** calculated for  $\text{C}_{19}\text{H}_{19}\text{FO}_2\text{Na}$   $[\text{M}+\text{Na}]^+$  321.1267, found 321.1258. **Chiral SFC**: 100 mm CHIRALCEL OJ-H, 2% *i*-PrOH, 2.5 mL/min, 220 nm, 44 °C, nozzle pressure = 200 bar  $\text{CO}_2$ ,  $t_{\text{R}1}$  = 10.2 min,  $t_{\text{R}2}$  = 11.3 min,  $t_{\text{R}3}$  (major) = 12.6 min,  $t_{\text{R}4}$  (minor) = 15.9 min.

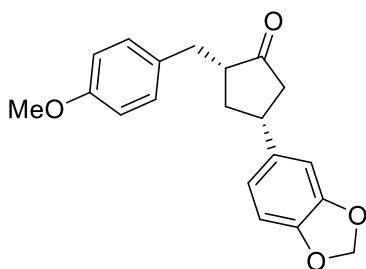

**(2R,4R)-4-(benzo[d][1,3]dioxol-5-yl)-2-(4-methoxybenzyl)cyclopentan-1-one (4g)**: The title compound was synthesized according to Method B and isolated by preparatory TLC (10% EtOAc in hexanes) as a yellow solid (27.0 mg, 83% yield, >20:1 *dr*, 96% *ee*,  $[\alpha]_{\text{D}}^{24} = +94.7$  (*c* 1.5,  $\text{CHCl}_3$ )).  **$^1\text{H NMR}$**  (400 MHz,  $\text{CDCl}_3$ )  $\delta$  7.10 (d, *J* = 8.4 Hz, 2H), 6.83 (d, *J* = 8.5 Hz, 2H), 6.75 (d, *J* = 7.9 Hz, 1H), 6.71 – 6.62 (m, 2H), 5.93 (s, 2H), 3.79 (s, 3H), 3.20 (ddd, *J* = 16.7, 12.8, 5.0 Hz, 2H), 2.74 (dd, *J* = 18.4, 7.6 Hz, 1H), 2.65 – 2.47 (m, 2H), 2.45 – 2.34 (m, 1H), 2.21 (dd, *J* = 18.5, 12.2 Hz, 1H), 1.62 (q, *J* = 12.1 Hz, 1H).  **$^{13}\text{C NMR}$**  (101 MHz,  $\text{CDCl}_3$ )  $\delta$  218.0, 158.2, 148.0, 146.4, 136.9, 131.8, 130.0, 119.8, 114.0, 108.4, 107.2, 101.1, 55.4, 52.9,

46.2, 39.8, 37.8, 34.7. **IR** (ATR): 2925, 1717, 1511, 1439, 1239, 1177, 1030, 935, 836, 806  $\text{cm}^{-1}$ . **HRMS** calculated for  $\text{C}_{20}\text{H}_{20}\text{O}_4\text{Na}$   $[\text{M}+\text{Na}]^+$  347.1259, found 347.1270. **Chiral SFC**: 100 mm CHIRALCEL OJ-H, 5% *i*-PrOH, 2.5 mL/min, 220 nm, 44 °C, nozzle pressure = 200 bar  $\text{CO}_2$ ,  $t_{\text{R}1}$  (major) = 8.6 min,  $t_{\text{R}2}$  (minor) = 10.4 min.

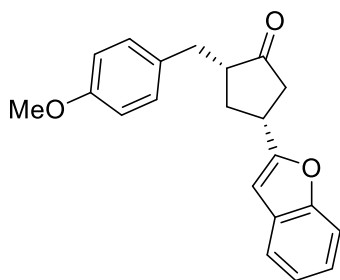

**(2R,4R)-4-(benzofuran-2-yl)-2-(4-methoxybenzyl)cyclopentan-1-one (4h)**: The title compound was synthesized according to Method B and isolated by preparatory TLC (5% EtOAc in hexanes) as a yellow solid (17.1 mg, 53% yield, >20:1 *dr*, 74% *ee*,  $[\alpha]_{\text{D}}^{24} = +134.6$  (*c* 0.97,  $\text{CHCl}_3$ )).  **$^1\text{H NMR}$**  (400 MHz,  $\text{CDCl}_3$ )  $\delta$  7.52 – 7.46 (m, 1H), 7.44 – 7.39 (m, 1H), 7.27 – 7.16 (m, 2H), 7.13 – 7.07 (m, 2H), 6.87 – 6.80 (m, 2H), 6.43 (s, 1H), 3.80 (s, 3H), 3.54 – 3.40 (m, 1H), 3.26 – 3.15 (m, 1H), 2.83 (dd, *J* = 18.6, 7.9 Hz, 1H), 2.64 – 2.42 (m, 4H), 1.91 – 1.79 (m, 1H).  **$^{13}\text{C NMR}$**  (101 MHz,  $\text{CDCl}_3$ )  $\delta$  216.9, 159.4, 158.3, 154.9, 131.6, 130.0, 128.5, 123.9, 122.9, 120.7, 114.1, 111.0, 101.7, 55.4, 52.3, 43.4, 34.9, 34.8, 34.1. **IR** (ATR): 2930, 1724, 1608, 1510,

1453, 1245, 1176, 1031, 805, 738  $\text{cm}^{-1}$ . **HRMS** calculated for  $\text{C}_{21}\text{H}_{20}\text{O}_3\text{Na}$   $[\text{M}+\text{Na}]^+$  343.1310, found 343.1303. **Chiral SFC**: 100 mm CHIRALCEL OJ-H, 10% *i*-PrOH, 2.0 mL/min, 220 nm, 44 °C, nozzle pressure = 200 bar  $\text{CO}_2$ ,  $t_{\text{R}1}$  (minor) = 15.3 min,  $t_{\text{R}2}$  (major) = 22.9 min.



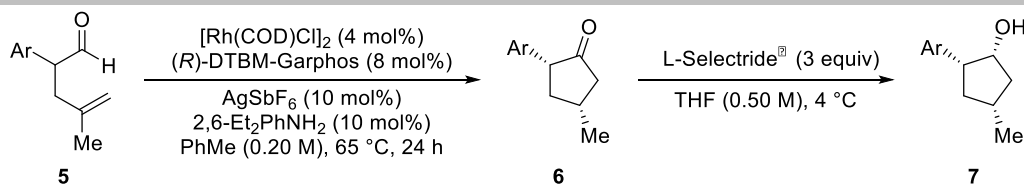

**Method C:** In a N<sub>2</sub>-filled glovebox, [Rh(COD)Cl]<sub>2</sub> (2.0 mg, 0.0040 mmol, 4 mol%), (R)-DTBM-Segphos (10.7 mg, 0.0080 mmol, 8 mol%), and toluene (0.50 mL, 0.20 M) were added to a 1 dram vial equipped with a magnetic stir bar. The solution was stirred at 30 °C for 10 min. AgSbF<sub>6</sub> (3.4 mg, 0.010 mmol, 10 mol%), was added, and the resulting mixture was stirred at 30 °C for 30 min. Aldehyde **5** (0.10 mmol, 1.0 equiv) and 2,6-Et<sub>2</sub>PhNH<sub>2</sub> (1.6 mL, 0.010 mmol, 10 mol%) were added. The vial was then sealed with a Teflon-lined screw cap and stirred at 65 °C for 24 h. The reaction mixture was cooled to rt, filtered through celite, and concentrated *in vacuo*. The hydroacylation yield and diastereoselectivity were determined by <sup>1</sup>H NMR analysis of the unpurified reaction mixture using triphenylmethane as an internal standard. The crude ketone **6** was dissolved in THF (0.50 M) and cooled to 4 °C. L-Selectride® (3 equiv, 1.0 M in THF) was added dropwise, and the resulting mixture was allowed to stirred at 4 °C for 16 h. The reaction mixture was quenched with 2 M aqueous NaOH and 30% aqueous H<sub>2</sub>O<sub>2</sub>, and the resulting mixture was extracted with EtOAc (3 x 10 mL). The combined organic layers were washed with brine, dried with anhydrous MgSO<sub>4</sub>, filtered, and concentrated *in vacuo*. The alcohol **7** was purified using preparative thin-layer chromatography.

**(1R,2R,4R)-4-methyl-2-phenylcyclopentan-1-ol (7a):** The title compound was synthesized according to Method C and isolated by preparatory TLC (5% EtOAc in hexanes) as a colorless oil (12.7 mg, 76% yield over 2 steps, >20:1:1:1 *dr*, >99% *ee*, [α]<sub>D</sub><sup>24</sup> = -25.1 (c 0.60, CHCl<sub>3</sub>)). <sup>1</sup>H NMR (400 MHz, CDCl<sub>3</sub>) δ 7.39 – 7.32 (m, 2H), 7.32 – 7.28 (m, 2H), 7.28 – 7.23 (m, 1H), 4.30 (dd, *J* = 7.5, 3.2 Hz, 1H), 3.16 – 3.02 (m, 1H), 2.43 – 2.26 (m, 1H), 2.21 – 2.09 (m, 1H), 2.05 (dt, *J* = 18.1, 6.3 Hz, 1H), 1.87 – 1.72 (m, 1H), 1.41 (ddd, *J* = 14.2, 7.2, 2.1 Hz, 1H), 1.19 (d, *J* = 6.6 Hz, 3H), 1.10 (d, *J* = 5.5 Hz, 1H). <sup>13</sup>C NMR (101 MHz, CDCl<sub>3</sub>) δ 139.9, 128.8, 128.7, 126.8, 75.8, 52.7, 42.7, 36.9, 32.3, 21.8. IR (ATR): 3426, 2952, 2868, 1683, 1449, 1215, 1030, 1004, 754, 698 cm<sup>-1</sup>. HRMS calculated for C<sub>12</sub>H<sub>16</sub>ONa [M+Na]<sup>+</sup> 199.1099, found 199.1092. Chiral SFC: 250 mm CHIRALPAK AD, 5% *i*-PrOH, 2.0 mL/min, 220 nm, 44 °C, nozzle pressure = 200 bar CO<sub>2</sub>, *t*<sub>R1</sub> = 6.2 min (minor), *t*<sub>R2</sub> = 6.7 min, *t*<sub>R3</sub> (major) = 7.5 min, *t*<sub>R4</sub> = 9.2 min.

**(1R,2R,4R)-4-methyl-2-(*p*-tolyl)cyclopentan-1-ol (7b):** The title compound was synthesized according to Method C and isolated by preparatory TLC (5% EtOAc in hexanes) as a colorless oil (12.5 mg, 65% yield over 2 steps, >20:1:1:1 *dr*, >99% *ee*, [α]<sub>D</sub><sup>24</sup> = -22.0 (c 0.68, CHCl<sub>3</sub>)). <sup>1</sup>H NMR (400 MHz, CDCl<sub>3</sub>) δ 7.20 (d, *J* = 8.3 Hz, 2H), 7.16 (d, *J* = 8.2 Hz, 2H), 4.28 (t, *J* = 4.5 Hz, 1H), 3.12 – 3.01 (m, 1H), 2.39 – 2.30 (m, 4H), 2.19 – 2.06 (m, 1H), 2.02 (dt, *J* = 12.5, 6.3 Hz, 1H), 1.78 (dd, *J* = 23.2, 12.0 Hz, 1H), 1.40 (ddd, *J* = 14.2, 7.3, 1.9 Hz, 1H), 1.18 (d, *J* = 6.6 Hz, 3H), 1.12 (s, 1H). <sup>13</sup>C NMR (101 MHz, CDCl<sub>3</sub>) δ 136.7, 136.4, 129.4, 128.6, 75.8, 52.3, 42.6, 37.0, 32.3, 21.8, 21.1. IR (ATR): 3449, 2951, 2926, 2868, 1515, 1455, 1129, 1103, 1002, 815 cm<sup>-1</sup>. HRMS calculated for C<sub>13</sub>H<sub>18</sub>ONa [M+Na]<sup>+</sup> 213.1255, found 213.1255. Chiral SFC: 100 mm CHIRALPAK AD-H, 3% *i*-PrOH, 2.0 mL/min, 220 nm, 44 °C, nozzle pressure = 200 bar CO<sub>2</sub>, *t*<sub>R1</sub> = 4.5 min (minor), *t*<sub>R2</sub> (major) = 7.5 min.

**(1R,2R,4R)-4-methyl-2-(*o*-tolyl)cyclopentan-1-ol (7c):** The title compound was synthesized according to Method C and isolated by preparatory TLC (5% EtOAc in hexanes) as a colorless oil (9.3 mg, 48% yield over 2 steps, >20:1:1:1 *dr*, 95% *ee*, [α]<sub>D</sub><sup>24</sup> = -33.0 (c 0.53, CHCl<sub>3</sub>)). <sup>1</sup>H NMR (400 MHz, CDCl<sub>3</sub>) δ 7.34 (d, *J* = 7.2 Hz, 1H), 7.25 – 7.13 (m, 3H), 4.37 – 4.31 (m, 1H), 3.31 – 3.17 (m, 1H), 2.44 – 2.31 (m, 4H), 2.08 (dt, *J* = 16.9, 8.6 Hz, 1H), 1.91 (dd, *J* = 13.6, 5.6 Hz, 2H), 1.39 (ddd, *J* = 14.2, 7.9, 2.2 Hz, 1H), 1.20 (d, *J* = 6.6 Hz, 3H), 1.04 – 0.88 (m, 1H). <sup>13</sup>C NMR (101 MHz, CDCl<sub>3</sub>) δ 137.3, 136.8, 130.6, 128.2, 126.8, 126.1, 73.2, 49.1, 43.0, 37.1, 32.2, 21.4, 19.9. IR (ATR): 3439, 2951, 2927, 2868, 1489, 1457, 1130, 1004, 755, 726 cm<sup>-1</sup>. HRMS calculated for C<sub>13</sub>H<sub>18</sub>ONa [M+Na]<sup>+</sup> 213.1255, found 213.1255. Chiral SFC: 100 mm CHIRALPAK AD-H, 2% *i*-PrOH, 2.0 mL/min, 220 nm, 44 °C, nozzle pressure = 200 bar CO<sub>2</sub>, *t*<sub>R1</sub> = 5.4 min (minor), *t*<sub>R2</sub> (major) = 6.5 min.

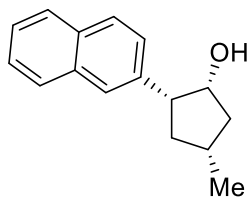

**(1R,2R,4R)-4-methyl-2-(naphthalen-2-yl)cyclopentan-1-ol (7d):** The title compound was synthesized according to Method C and isolated by preparatory TLC (5% EtOAc in hexanes) as a yellow solid (11.5 mg, 51% yield over 2 steps, >20:1:1:1 *dr*, 97% *ee*,  $[\alpha]_D^{24} = -29.7$  (c 0.75, CHCl<sub>3</sub>)). **<sup>1</sup>H NMR** (400 MHz, CDCl<sub>3</sub>)  $\delta$  7.83 (d, *J* = 8.2 Hz, 3H), 7.75 (s, 1H), 7.47 (ddd, *J* = 16.9, 11.6, 6.6 Hz, 3H), 4.41 (t, *J* = 4.6 Hz, 1H), 3.32 – 3.21 (m, 1H), 2.47 – 2.34 (m, 1H), 2.26 – 2.07 (m, 2H), 1.95 (dd, *J* = 22.9, 11.6 Hz, 1H), 1.46 (ddd, *J* = 14.3, 7.0, 1.9 Hz, 1H), 1.24 (d, *J* = 6.4 Hz, 3H), 1.14 (s, 1H). **<sup>13</sup>C NMR** (101 MHz, CDCl<sub>3</sub>)  $\delta$  137.4, 133.7, 132.6, 128.2, 127.8, 127.7, 127.4, 127.1, 126.3, 125.7, 75.8, 52.8, 42.8, 36.9, 32.4, 21.8. **IR** (ATR): 3466, 2950, 2925, 2865, 1507, 1454, 1190, 1129, 1002, 829, 745 cm<sup>-1</sup>. **HRMS** calculated for C<sub>16</sub>H<sub>18</sub>ONa [M+Na]<sup>+</sup> 249.1255, found 249.1255. **Chiral SFC:** 100 mm CHIRALPAK AD-H, 3% *i*-PrOH, 2.0 mL/min, 220 nm, 44 °C, nozzle pressure = 200 bar CO<sub>2</sub>, *t*<sub>R1</sub> = 18.4 min (minor), *t*<sub>R2</sub> (major) = 20.7 min.

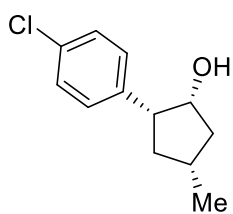

**(1R,2R,4R)-2-(4-chlorophenyl)-4-methylcyclopentan-1-ol (7e):** The title compound was synthesized according to Method C and isolated by preparatory TLC (5% EtOAc in hexanes) as a colorless oil (12.7 mg, 57% yield over 2 steps, >20:1:1:1 *dr*, 99% *ee*,  $[\alpha]_D^{24} = -40.9$  (c 0.30, CHCl<sub>3</sub>)). **<sup>1</sup>H NMR** (400 MHz, CDCl<sub>3</sub>)  $\delta$  7.32 (d, *J* = 8.6 Hz, 2H), 7.23 (d, *J* = 8.6 Hz, 2H), 4.32 – 4.25 (m, 1H), 3.09 – 2.98 (m, 1H), 2.42 – 2.29 (m, 1H), 2.12 (dtd, *J* = 13.6, 10.3, 6.8 Hz, 1H), 2.02 (dt, *J* = 12.5, 6.2 Hz, 1H), 1.75 (dd, *J* = 23.2, 11.9 Hz, 1H), 1.39 (ddd, *J* = 14.3, 7.2, 2.1 Hz, 1H), 1.18 (d, *J* = 6.6 Hz, 3H), 1.05 (s, 1H). **<sup>13</sup>C NMR** (101 MHz, CDCl<sub>3</sub>)  $\delta$  138.5, 132.6, 130.1, 128.7, 75.7, 52.0, 42.9, 37.1, 32.3, 21.7. **IR** (ATR): 3437, 2952, 2927, 2868, 1492, 1129, 1090, 1002, 831, 721 cm<sup>-1</sup>. **HRMS** calculated for C<sub>12</sub>H<sub>15</sub>ClO [M]<sup>+</sup> 210.0811, found 210.0817. **Chiral SFC:** 250 mm CHIRALPAK AD, 5% *i*-PrOH, 2.0 mL/min, 220 nm, 44 °C, nozzle pressure = 200 bar CO<sub>2</sub>, *t*<sub>R1</sub> = 9.6 min (minor), *t*<sub>R2</sub> = 10.4 min, *t*<sub>R3</sub> (major) = 11.5 min, *t*<sub>R4</sub> = 12.0 min.

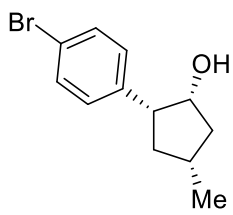

**(1R,2R,4R)-2-(4-bromophenyl)-4-methylcyclopentan-1-ol (7f):** The title compound was synthesized according to Method C and isolated by preparatory TLC (5% EtOAc in hexanes) as a colorless oil (14.2 mg, 57% yield over 2 steps, >20:1:1:1 *dr*, 98% *ee*,  $[\alpha]_D^{24} = -27.7$  (c 0.33, CHCl<sub>3</sub>)). **<sup>1</sup>H NMR** (400 MHz, CDCl<sub>3</sub>)  $\delta$  7.47 (d, *J* = 8.4 Hz, 2H), 7.21 – 7.14 (m, 2H), 4.29 (t, *J* = 4.5 Hz, 1H), 3.08 – 2.96 (m, 1H), 2.42 – 2.29 (m, 1H), 2.19 – 2.06 (m, 1H), 2.06 – 1.96 (m, 1H), 1.81 – 1.67 (m, 1H), 1.39 (ddd, *J* = 14.3, 7.2, 2.1 Hz, 1H), 1.18 (d, *J* = 6.6 Hz, 3H), 1.03 (s, 1H). **<sup>13</sup>C NMR** (101 MHz, CDCl<sub>3</sub>)  $\delta$  139.0, 131.7, 130.5, 120.6, 75.7, 52.1, 42.9, 37.1, 32.3, 21.7. **IR** (ATR): 3440, 2951, 2926, 2868, 1489, 1129, 1072, 1009, 818, 795 cm<sup>-1</sup>. **HRMS** calculated for C<sub>12</sub>H<sub>15</sub>BrO [M]<sup>+</sup> 254.0306, found 254.0297. **Chiral SFC:** 250 mm CHIRALPAK AD, 5% *i*-PrOH, 2.0 mL/min, 220 nm, 44 °C, nozzle pressure = 200 bar CO<sub>2</sub>, *t*<sub>R1</sub> = 12.9 min (minor), *t*<sub>R2</sub> (major) = 16.1 min.

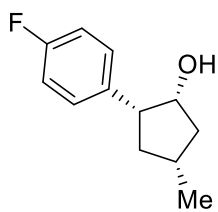

**(1R,2R,4R)-2-(4-fluorophenyl)-4-methylcyclopentan-1-ol (7g):** The title compound was synthesized according to Method C and isolated by preparatory TLC (5% EtOAc in hexanes) as a colorless oil (11.5 mg, 56% yield over 2 steps, >20:1:1:1 *dr*, >99% *ee*,  $[\alpha]_D^{24} = -18.3$  (c 0.26, CHCl<sub>3</sub>)). **<sup>1</sup>H NMR** (400 MHz, CDCl<sub>3</sub>)  $\delta$  7.26 (dd, *J* = 7.0, 3.8 Hz, 2H), 7.07 – 6.99 (m, 2H), 4.28 (t, *J* = 4.5 Hz, 1H), 3.12 – 2.98 (m, 1H), 2.40 – 2.28 (m, 1H), 2.12 (dtd, *J* = 13.3, 10.0, 6.8 Hz, 1H), 2.02 (dt, *J* = 12.4, 6.3 Hz, 1H), 1.75 (dd, *J* = 22.9, 12.2 Hz, 1H), 1.39 (ddd, *J* = 14.4, 7.2, 2.1 Hz, 1H), 1.18 (d, *J* = 6.6 Hz, 3H), 1.05 (s, 1H). **<sup>13</sup>C NMR** (101 MHz, CDCl<sub>3</sub>)  $\delta$  161.9 (d, *J* = 244.7 Hz), 135.5 (d, *J* = 3.2 Hz), 130.1 (d, *J* = 7.8 Hz), 115.4 (d, *J* = 21.0 Hz), 75.7, 51.9, 42.8, 37.3, 32.3, 21.8. **<sup>19</sup>F NMR** (376 MHz, CDCl<sub>3</sub>)  $\delta$  -116.8. **IR** (ATR): 3469, 2955, 2929, 2871, 1598, 1509, 1222, 1157, 1004, 832 cm<sup>-1</sup>. **HRMS** calculated for C<sub>12</sub>H<sub>15</sub>FO [M]<sup>+</sup> 194.1107, found 194.1110. **Chiral SFC:** 100 mm CHIRALPAK AD-H, 2% *i*-PrOH, 2.0 mL/min, 220 nm, 44 °C, nozzle pressure = 200 bar CO<sub>2</sub>, *t*<sub>R1</sub> = 4.6 min (minor), *t*<sub>R2</sub> (major) = 5.8 min.

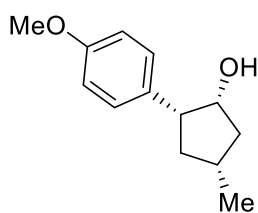

**(1R,2R,4R)-2-(4-methoxyphenyl)-4-methylcyclopentan-1-ol (7h):** The title compound was synthesized according to Method C and isolated by preparatory TLC (10% EtOAc in hexanes) as a colorless oil (10.4 mg, 50% yield over 2 steps, >20:1:1:1 *dr*, 99% *ee*,  $[\alpha]_D^{24} = -39.1$  (c 0.51, CHCl<sub>3</sub>)). **<sup>1</sup>H NMR** (400 MHz, CDCl<sub>3</sub>)  $\delta$  7.25 – 7.17 (m, 2H), 6.93 – 6.85 (m, 2H), 4.28 – 4.21 (m, 1H), 3.81 (s, 3H), 3.10 – 2.98 (m, 1H), 2.39 – 2.28 (m, 1H), 2.11 (dtd, *J* = 10.2, 9.5, 6.7 Hz, 1H), 2.01 (dt, *J* = 12.4, 6.4 Hz, 1H), 1.81 – 1.68 (m,

1H), 1.39 (ddd,  $J = 14.2, 7.3, 2.1$  Hz, 1H), 1.18 (d,  $J = 6.6$  Hz, 3H), 1.12 (s, 1H).  $^{13}\text{C}$  NMR (101 MHz,  $\text{CDCl}_3$ )  $\delta$  158.6, 131.7, 129.7, 114.1, 75.8, 55.4, 51.8, 42.6, 37.2, 32.3, 21.8. IR (ATR): 3450, 2951, 2868, 1611, 1512, 1245, 1178, 1033, 1002, 830  $\text{cm}^{-1}$ . HRMS calculated for  $\text{C}_{13}\text{H}_{18}\text{O}_2\text{Na}$   $[\text{M}+\text{Na}]^+$  229.1205, found 229.1204. Chiral SFC: 250 mm CHIRALPAK AD, 5% *i*-PrOH, 2.0 mL/min, 220 nm, 44 °C, nozzle pressure = 200 bar  $\text{CO}_2$ ,  $t_{\text{R}1} = 10.2$  min (minor),  $t_{\text{R}2} = 11.3$  min,  $t_{\text{R}3}$  (major) = 12.4 min,  $t_{\text{R}4} = 14.2$  min.

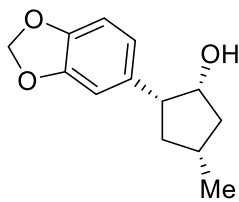

**(1R,2R,4R)-2-(benzo[d][1,3]dioxol-5-yl)-4-methylcyclopentan-1-ol (7i):** The title compound was synthesized according to Method C and isolated by preparatory TLC (10% EtOAc in hexanes) as a colorless oil (11.3 mg, 51% yield over 2 steps, >20:1:1:1 *dr*, 99% *ee*,  $[\alpha]_{\text{D}}^{24} = -40.9$  (*c* 0.58,  $\text{CHCl}_3$ )).  $^1\text{H}$  NMR (400 MHz,  $\text{CDCl}_3$ )  $\delta$  6.82 – 6.76 (m, 2H), 6.74 (ddd,  $J = 8.0, 1.6, 0.6$  Hz, 1H), 5.95 (s, 2H), 4.28 – 4.16 (m, 1H), 3.07 – 2.94 (m, 1H), 2.38 – 2.24 (m, 1H), 2.16 – 2.03 (m, 1H), 1.99 (dt,  $J = 12.4, 6.4$  Hz, 1H), 1.77 – 1.64 (m, 1H), 1.38 (ddd,  $J = 14.2, 7.2, 2.0$  Hz, 1H), 1.17 (d,  $J = 6.6$  Hz, 4H).  $^{13}\text{C}$  NMR (101 MHz,

$\text{CDCl}_3$ )  $\delta$  148.0, 146.4, 133.6, 121.5, 109.2, 108.4, 101.1, 75.8, 52.3, 42.6, 37.2, 32.2, 21.8. IR (ATR): 3557, 2951, 2868, 1503, 1489, 1440, 1250, 1229, 1037, 932  $\text{cm}^{-1}$ . HRMS calculated for  $\text{C}_{13}\text{H}_{16}\text{O}_3\text{Na}$   $[\text{M}+\text{Na}]^+$  243.0997, found 243.1000. Chiral SFC: 250 mm CHIRALPAK AD, 10% *i*-PrOH, 2.0 mL/min, 220 nm, 44 °C, nozzle pressure = 200 bar  $\text{CO}_2$ ,  $t_{\text{R}1} = 7.0$  min (minor),  $t_{\text{R}2} = 7.9$  min,  $t_{\text{R}3}$  (major) = 11.6 min,  $t_{\text{R}4} = 14.4$  min.

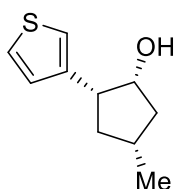

**(1R,2R,4R)-4-methyl-2-(thiophen-3-yl)cyclopentan-1-ol (7j):** The title compound was synthesized according to Method B and isolated by preparatory TLC (5% EtOAc in hexanes) as a colorless oil (9.3 mg, 51% yield, >20:1:1:1 *dr*, >99% *ee*,  $[\alpha]_{\text{D}}^{24} = -26.1$  (*c* 0.52,  $\text{CHCl}_3$ )).  $^1\text{H}$  NMR (400 MHz,  $\text{CDCl}_3$ )  $\delta$  7.34 (dd,  $J = 4.9, 3.0$  Hz, 1H), 7.12 – 7.07 (m, 1H), 7.04 (d,  $J = 4.9$  Hz, 1H), 4.27 (t,  $J = 4.4$  Hz, 1H), 3.21 – 3.07 (m, 1H), 2.37 – 2.22 (m, 1H), 2.19 – 2.01 (m, 2H), 1.79 – 1.65 (m, 1H), 1.40 (ddd,  $J = 14.3, 6.5, 2.0$  Hz, 1H), 1.19 (s, 1H), 1.17 (d,  $J = 6.3$  Hz, 3H).  $^{13}\text{C}$  NMR (101 MHz,  $\text{CDCl}_3$ )  $\delta$  141.1, 128.2, 126.0, 121.7, 75.3, 48.5, 42.5, 38.0, 32.2, 21.9. IR

(ATR): 3440, 2951, 2926, 2867, 1455, 1128, 1002, 833, 778, 683  $\text{cm}^{-1}$ . HRMS calculated for  $\text{C}_{10}\text{H}_{14}\text{OSNa}$   $[\text{M}+\text{Na}]^+$  205.0663, found 205.0658. Chiral SFC: 250 mm CHIRALPAK AD, 2% *i*-PrOH, 2.0 mL/min, 220 nm, 44 °C, nozzle pressure = 200 bar  $\text{CO}_2$ ,  $t_{\text{R}1} = 14.0$  min (minor),  $t_{\text{R}2}$  (major) = 18.9 min.

### 3. Preparation of Substrates

#### Preparation of Aldehydes 1

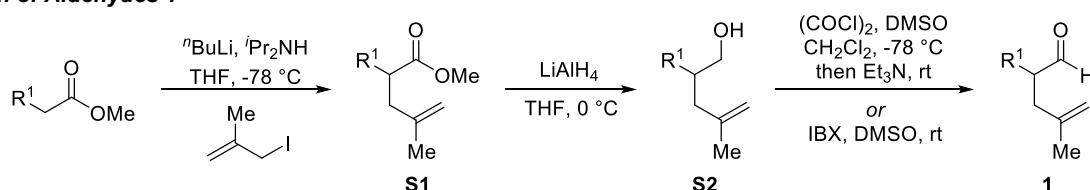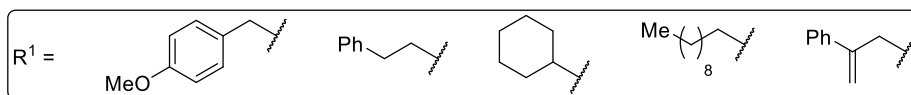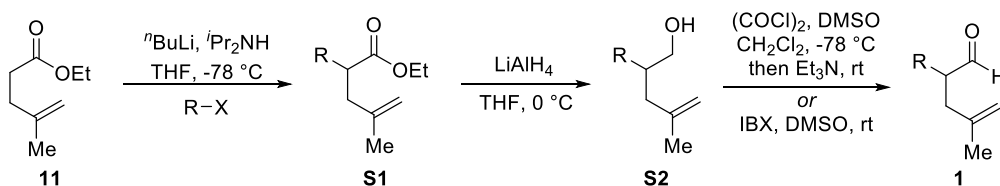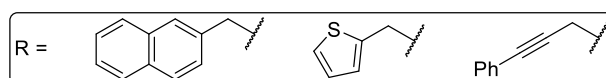

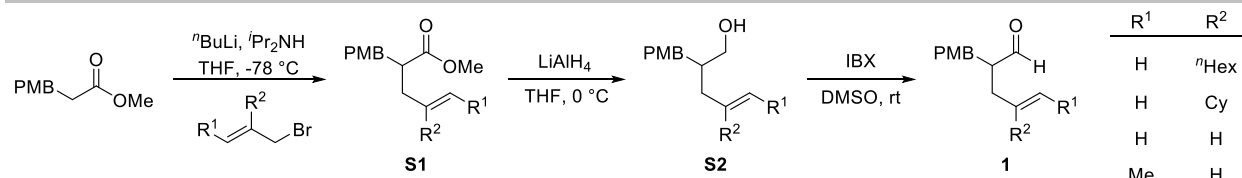

### Preparation of methallyl iodide

To a round bottom flask was added NaI (1.5 equiv) and acetone (1 M). Then, methallyl chloride (1.0 equiv) was added dropwise, and the resulting mixture was allowed to stir at rt for 3 h. The reaction was quenched with H<sub>2</sub>O and extracted with pentanes. The combined organic layers were washed with 10% aqueous Na<sub>2</sub>S<sub>2</sub>O<sub>3</sub>, dried with anhydrous MgSO<sub>4</sub>, and concentrated *in vacuo* below rt. The crude methallyl iodide was used without further purification.

### General Procedure for the Ester Alkylation

To an oven-dried round bottom flask was added <sup>t</sup>Pr<sub>2</sub>NH (1.2 equiv) and THF (0.5 M), and the resulting solution was cooled to -78 °C. Then, <sup>n</sup>BuLi (1.1 equiv, 2.5 M in THF) was added dropwise, and the resulting mixture was stirred for 45 min. A solution of the ester (1 equiv) in THF (0.5 M) was added dropwise, and the resulting mixture was stirred for 1 h. The appropriate alkyl halide (1.2 equiv) was added, and the reaction mixture was stirred until full consumption of the ester was observed by GC-MS. The reaction was quenched with saturated aqueous NH<sub>4</sub>Cl and extracted with EtOAc. The combined organic layers were washed with brine, dried with anhydrous MgSO<sub>4</sub>, and concentrated *in vacuo*. The alkylated ester was used without further purification.

### General Procedure for the Reduction with LiAlH<sub>4</sub>

The crude alkylated ester was dissolved in THF (0.50 M), and the resulting solution was cooled to 0 °C. LiAlH<sub>4</sub> (1.5 equiv) was added portionwise, and the resulting mixture was allowed to stir for 30 min. The reaction was quenched using the Fieser method, filtered through celite, and concentrated *in vacuo*. The residue was purified by column chromatography to afford the pure alcohol **S2**.

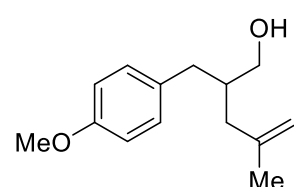

**2-(4-methoxybenzyl)-4-methylpent-4-en-1-ol (S2a)**: The title compound was prepared using the general procedures for ester alkylation and ester reduction starting from methyl 3-(4-methoxyphenyl)propanoate (3.9 g, 20 mmol, 1 equiv), <sup>t</sup>Pr<sub>2</sub>NH (3.4 mL, 24 mmol, 1.2 equiv), <sup>n</sup>BuLi (8.8 mL, 22 mmol, 1.1 equiv, 2.5 M in THF), methallyl iodide (4.4 g, 24 mmol, 1.2 equiv), and THF (80 mL, 0.25 M). Crude **S1a** (1 equiv) was reduced to **S2a** using LiAlH<sub>4</sub> (1.1 g, 30 mmol, 1.5 equiv) and THF (40 mL, 0.50 M). The crude material was purified by column chromatography (10% EtOAc in hexanes) to afford **S2a** as a colorless oil (2.27 g, 51% yield). <sup>1</sup>H NMR (400 MHz, CDCl<sub>3</sub>) δ 7.11 (d, *J* = 8.5 Hz, 2H), 6.84 (d, *J* = 8.5 Hz, 2H), 4.81 (s, 1H), 4.78 (s, 1H), 3.80 (s, 3H), 3.58 – 3.47 (m, 2H), 2.58 (d, *J* = 6.8 Hz, 2H), 2.13 (dd, *J* = 13.3, 7.9 Hz, 1H), 2.02 (dt, *J* = 12.6, 5.7 Hz, 2H), 1.74 (s, 3H), 1.43 (s, 1H). <sup>13</sup>C NMR (101 MHz, CDCl<sub>3</sub>) δ 158.0, 144.7, 132.7, 130.2, 113.9, 112.3, 65.2, 55.4, 40.6, 40.4, 36.9, 22.4. IR (ATR): 3368, 2923, 2853, 1511, 1244, 887 cm<sup>-1</sup>. HRMS calculated for C<sub>14</sub>H<sub>20</sub>O<sub>2</sub>Na [M+Na]<sup>+</sup> 243.1361, found 243.1360.

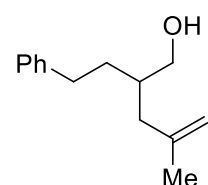

**4-methyl-2-phenethylpent-4-en-1-ol (S2c)**: The title compound was prepared using the general procedures for ester alkylation and ester reduction starting from methyl 4-phenylbutanoate (2.0 g, 11.2 mmol, 1 equiv), <sup>t</sup>Pr<sub>2</sub>NH (1.9 mL, 13.4 mmol, 1.2 equiv), <sup>n</sup>BuLi (4.9 mL, 12.3 mmol, 1.1 equiv, 2.5 M in THF), methallyl iodide (2.4 g, 13.4 mmol, 1.2 equiv), and THF (45 mL, 0.25 M). Crude **S1c** (1 equiv) was reduced to **S2c** using LiAlH<sub>4</sub> (637 mg, 16.8 mmol, 1.5 equiv) and THF (22 mL, 0.51 M). The crude material was purified by column chromatography (10% EtOAc in hexanes) to afford **S2c** as a colorless oil (1.30 g, 57% yield). <sup>1</sup>H NMR (400 MHz, CDCl<sub>3</sub>) δ 7.32 – 7.27 (m, 2H), 7.23 – 7.16 (m, 3H), 4.83 – 4.78 (m, 1H), 4.78 – 4.73 (m, 1H), 3.61 (s, 2H), 2.73 – 2.62 (m, 2H), 2.16 – 2.06 (m, 2H), 1.81 – 1.59 (m, 6H), 1.34 (s, 1H). <sup>13</sup>C NMR (101 MHz, CDCl<sub>3</sub>) δ 144.8, 142.6, 128.5, 125.9, 112.2, 65.8, 40.7, 38.0, 33.4, 33.0, 22.4. IR (ATR): 3335, 2920, 1648, 1453, 1029, 667 cm<sup>-1</sup>. HRMS calculated for C<sub>14</sub>H<sub>20</sub>O<sub>2</sub>Na [M+Na]<sup>+</sup> 227.1412, found 227.1412.

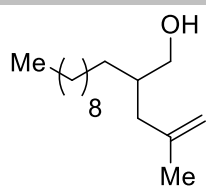

**2-(2-methylallyl)dodecan-1-ol (S2e):** The title compound was prepared using the general procedures for ester alkylation and ester reduction starting from methyl dodecanoate (2.1 g, 8.5 mmol, 1 equiv),  $i$ Pr<sub>2</sub>NH (1.4 mL, 10.2 mmol, 1.2 equiv),  $n$ BuLi (3.7 mL, 9.4 mmol, 1.1 equiv, 2.5 M in THF), methallyl iodide (1.9 g, 10.2 mmol, 1.2 equiv), and THF (34 mL, 0.25 M). Crude **S1e** (1 equiv) was reduced to **S2e** using LiAlH<sub>4</sub> (484 mg, 12.8 mmol, 1.5 equiv) and THF (17 mL, 0.50 M). The crude material was purified by column chromatography (10% EtOAc in hexanes) to afford **S2e** as a colorless oil (1.48 g, 72% yield). **<sup>1</sup>H NMR** (400 MHz, CDCl<sub>3</sub>)  $\delta$  4.78 (s, 1H), 4.74 (s, 1H), 3.55 (dd,  $J$  = 5.3, 2.3 Hz, 2H), 2.10 – 2.00 (m, 2H), 1.74 (s, 3H), 1.73 – 1.56 (m, 2H), 1.27 (s, 18H), 0.89 (t,  $J$  = 6.7 Hz, 3H). **<sup>13</sup>C NMR** (101 MHz, CDCl<sub>3</sub>)  $\delta$  145.2, 111.9, 66.1, 40.9, 38.5, 32.1, 31.3, 30.1, 29.80, 29.77, 29.5, 27.1, 22.8, 22.4, 14.3. **IR** (ATR): 3343, 2921, 2852, 1455, 1375, 886 cm<sup>-1</sup>. **HRMS** calculated for C<sub>16</sub>H<sub>32</sub>O [M]<sup>+</sup> 240.2453, found 240.2458.

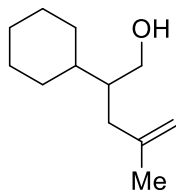

**2-cyclohexyl-4-methylpent-4-en-1-ol (S2f):** The title compound was prepared using the general procedures for ester alkylation and ester reduction starting from methyl 2-cyclohexylacetate (1.5 g, 9.7 mmol, 1 equiv),  $i$ Pr<sub>2</sub>NH (1.6 mL, 11.7 mmol, 1.2 equiv),  $n$ BuLi (4.3 mL, 10.7 mmol, 1.1 equiv, 2.5 M in THF), methallyl iodide (2.1 g, 11.7 mmol, 1.2 equiv), and THF (39 mL, 0.25 M). Crude **S1f** (1 equiv) was reduced to **S2f** using LiAlH<sub>4</sub> (552 mg, 14.6 mmol, 1.5 equiv) and THF (19 mL, 0.51 M). The crude material was purified by column chromatography (10% EtOAc in hexanes) to afford **S2f** as a colorless oil (1.25 g, 71% yield). **<sup>1</sup>H NMR** (400 MHz, CDCl<sub>3</sub>)  $\delta$  4.78 (s, 1H), 4.75 (s, 1H), 3.65 – 3.53 (m, 2H), 2.07 (ddd,  $J$  = 23.0, 13.8, 7.4 Hz, 2H), 1.74 (s, 4H), 1.67 (d,  $J$  = 10.3 Hz, 3H), 1.61 – 1.55 (m, 1H), 1.45 (d,  $J$  = 11.8 Hz, 2H), 1.32 – 1.16 (m, 3H), 1.08 (dt,  $J$  = 24.3, 12.3 Hz, 3H). **<sup>13</sup>C NMR** (101 MHz, CDCl<sub>3</sub>)  $\delta$  145.8, 111.9, 64.1, 43.8, 39.0, 37.9, 30.2, 30.1, 27.0, 26.91, 26.87, 22.3. **IR** (ATR): 3335, 2910, 2850, 1647, 1447, 1069 cm<sup>-1</sup>. **HRMS** calculated for C<sub>12</sub>H<sub>22</sub>O [M+H]<sup>+</sup> 183.1749, found 183.1753.

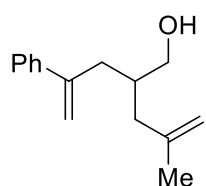

**4-methyl-2-(2-phenylallyl)pent-4-en-1-ol (S2g):** The title compound was prepared using the general procedures for ester alkylation and ester reduction starting from methyl 4-phenylpent-4-enoate<sup>[1]</sup> (1.6 g, 8.3 mmol, 1 equiv),  $i$ Pr<sub>2</sub>NH (1.4 mL, 10.0 mmol, 1.2 equiv),  $n$ BuLi (3.6 mL, 9.1 mmol, 1.1 equiv, 2.5 M in THF), methallyl iodide (1.8 g, 10.0 mmol, 1.2 equiv), and THF (33 mL, 0.25 M). Crude **S1g** (1 equiv) was reduced to **S2g** using LiAlH<sub>4</sub> (472 mg, 12.5 mmol, 1.5 equiv) and THF (17 mL, 0.49 M). The crude material was purified by column chromatography (10% EtOAc in hexanes) to afford **S2g** as a yellow oil (1.23 g, 68% yield). **<sup>1</sup>H NMR** (400 MHz, CDCl<sub>3</sub>)  $\delta$  7.43 – 7.39 (m, 2H), 7.38 – 7.31 (m, 2H), 7.31 – 7.27 (m, 1H), 5.32 (d,  $J$  = 1.7 Hz, 1H), 5.12 (m, 1H), 4.83 – 4.77 (m, 1H), 4.77 – 4.70 (m, 1H), 3.54 (d,  $J$  = 5.0 Hz, 2H), 2.55 (dd,  $J$  = 4.8, 3.5 Hz, 2H), 2.16 – 2.01 (m, 2H), 1.88 – 1.75 (m, 1H), 1.63 (dd,  $J$  = 1.4, 0.9 Hz, 3H), 1.45 (s, 1H). **<sup>13</sup>C NMR** (101 MHz, CDCl<sub>3</sub>)  $\delta$  147.5, 144.7, 141.1, 128.5, 127.6, 126.4, 114.4, 112.3, 65.6, 40.5, 37.7, 36.7, 22.3. **IR** (ATR): 3391, 2930, 1682, 1446, 1027 cm<sup>-1</sup>. **HRMS** calculated for C<sub>15</sub>H<sub>20</sub>O [M]<sup>+</sup> 216.1514, found 216.1507.

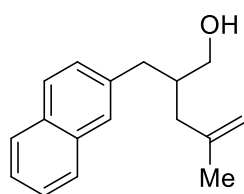

**4-methyl-2-(naphthalen-2-ylmethyl)pent-4-en-1-ol (S2b):** The title compound was prepared using the general procedures for ester alkylation and ester reduction starting from ethyl 4-methylpent-4-enoate<sup>[2]</sup> (**11**) (1.7 g, 12 mmol, 1 equiv),  $i$ Pr<sub>2</sub>NH (2.0 mL, 14.4 mmol, 1.2 equiv),  $n$ BuLi (5.3 mL, 13.2 mmol, 1.1 equiv, 2.5 M in THF), 2-(bromomethyl)naphthalene (3.2 g, 14.4 mmol, 1.2 equiv), and THF (48 mL, 0.25 M). Crude **S1b** (1 equiv) was reduced to **S2b** using LiAlH<sub>4</sub> (683 mg, 18 mmol, 1.5 equiv) and THF (24 mL, 0.50 M). The crude material was purified by column chromatography (10% EtOAc in hexanes) to afford **S2b** as a yellow oil (1.64 g, 57% yield). **<sup>1</sup>H NMR** (500 MHz, CDCl<sub>3</sub>)  $\delta$  7.81 (dd,  $J$  = 16.1, 7.8 Hz, 3H), 7.64 (s, 1H), 7.51 – 7.42 (m, 2H), 7.36 (dd,  $J$  = 8.3, 1.4 Hz, 1H), 4.84 (s, 1H), 4.82 (s, 1H), 3.63 – 3.53 (m, 2H), 2.88 – 2.75 (m, 2H), 2.27 – 2.04 (m, 3H), 1.76 (s, 3H), 1.46 (s, 1H). **<sup>13</sup>C NMR** (101 MHz, CDCl<sub>3</sub>)  $\delta$  144.6, 138.3, 133.7, 132.2, 128.1, 127.9, 127.7, 127.6, 126.1, 125.4, 112.4, 65.1, 62.9, 40.4, 37.9, 29.9, 22.4. **IR** (ATR): 3355, 2923, 1600, 1444, 1077 cm<sup>-1</sup>. **HRMS** calculated for C<sub>17</sub>H<sub>20</sub>ONa [M+Na]<sup>+</sup> 263.1412, found 263.1418.

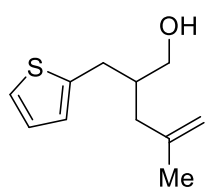

**4-methyl-2-(thiophen-2-ylmethyl)pent-4-en-1-ol (S2d):** The title compound was prepared using the general procedures for ester alkylation and ester reduction starting from ethyl 4-methylpent-4-enoate<sup>[2]</sup> (**11**) (3.5 g, 25 mmol, 1 equiv),  $i$ Pr<sub>2</sub>NH (4.2 mL, 30 mmol, 1.2 equiv),  $n$ BuLi (11 mL, 27.5 mmol, 1.1 equiv, 2.5 M in THF), 2-(bromomethyl)thiophene<sup>[3]</sup> (5.3 g, 30 mmol, 1.2 equiv), and THF (100 mL, 0.25 M). Crude **S1d** (1 equiv) was reduced to **S2d** using LiAlH<sub>4</sub> (1.4 g, 38 mmol, 1.5 equiv) and THF (50 mL, 0.50 M). The crude material was

purified by column chromatography (10% EtOAc in hexanes) to afford **S2d** as a yellow oil (3.73 g, 76% yield).  $^1\text{H NMR}$  (400 MHz,  $\text{CDCl}_3$ )  $\delta$  7.15 (d,  $J = 5.1$  Hz, 1H), 6.94 (dd,  $J = 5.1, 3.4$  Hz, 1H), 6.82 (d,  $J = 3.4$  Hz, 1H), 4.83 (s, 1H), 4.79 (s, 1H), 3.58 (d,  $J = 4.6$  Hz, 2H), 2.95 – 2.79 (m, 2H), 2.18 – 1.99 (m, 3H), 1.75 (s, 3H), 1.43 (s, 1H).  $^{13}\text{C NMR}$  (101 MHz,  $\text{CDCl}_3$ )  $\delta$  144.3, 143.2, 126.9, 125.6, 123.6, 112.5, 64.9, 40.7, 40.0, 31.5, 22.4. **IR** (ATR): 3341, 2919, 1648, 1439, 1032, 888  $\text{cm}^{-1}$ . **HRMS** calculated for  $\text{C}_{11}\text{H}_{16}\text{OSNa}$   $[\text{M}+\text{Na}]^+$  219.0820, found 219.0814.

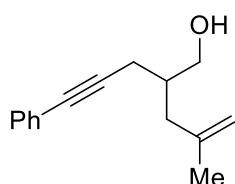

**4-methyl-2-(3-phenylprop-2-yn-1-yl)pent-4-en-1-ol (S2h):** The title compound was prepared using the general procedures for ester alkylation and ester reduction starting from ethyl 4-methylpent-4-enoate<sup>[2]</sup> (**11**) (2.6 g, 18 mmol, 1 equiv),  $^i\text{Pr}_2\text{NH}$  (3.1 mL, 21.6 mmol, 1.2 equiv),  $^n\text{BuLi}$  (7.9 mL, 19.8 mmol, 1.1 equiv, 2.5 M in THF), (3-bromoprop-1-yn-1-yl)benzene<sup>[4]</sup> (4.2 g, 21.6 mmol, 1.2 equiv), and THF (72 mL, 0.25 M).

Crude **S1h** (1 equiv) was reduced to **S2h** using  $\text{LiAlH}_4$  (1.0 g, 27 mmol, 1.5 equiv) and THF (36 mL, 0.50 M). The crude material was purified by column chromatography (10% EtOAc in hexanes) to afford **S2h** as a yellow oil (2.57 g, 67% yield).  $^1\text{H NMR}$  (400 MHz,  $\text{CDCl}_3$ )  $\delta$  7.44 – 7.37 (m, 2H), 7.33 – 7.26 (m, 3H), 4.84 (s, 1H), 4.81 (s, 1H), 3.79 – 3.67 (m, 2H), 2.55 (dd,  $J = 17.0, 5.3$  Hz, 1H), 2.46 (dd,  $J = 17.0, 6.6$  Hz, 1H), 2.25 – 2.13 (m, 2H), 2.11 – 1.99 (m, 1H), 1.81 (s, 1H), 1.78 (s, 3H).  $^{13}\text{C NMR}$  (101 MHz,  $\text{CDCl}_3$ )  $\delta$  143.7, 131.7, 128.4, 127.8, 123.9, 112.6, 88.1, 82.3, 65.4, 39.5, 38.0, 22.4, 21.1. **IR** (ATR): 3334, 2928, 1649, 1489, 1069, 945  $\text{cm}^{-1}$ . **HRMS** calculated for  $\text{C}_{15}\text{H}_{18}\text{ONa}$   $[\text{M}+\text{Na}]^+$  237.1255, found 237.1243.

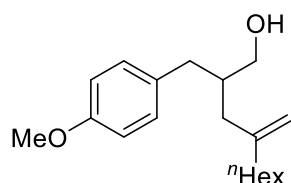

**2-(4-methoxybenzyl)-4-methylenedecan-1-ol (S2i):** The title compound was prepared using the general procedures for ester alkylation and ester reduction starting from methyl 3-(4-methoxyphenyl)propanoate (971 mg, 5.0 mmol, 1 equiv),  $^i\text{Pr}_2\text{NH}$  (0.85 mL, 6.0 mmol, 1.2 equiv),  $^n\text{BuLi}$  (2.2 mL, 5.5 mmol, 1.1 equiv, 2.5 M in THF), 2-(bromomethyl)oct-1-ene<sup>[5]</sup> (1.2 g, 6.0 mmol, 1.2 equiv), and THF (20 mL, 0.25 M). Crude **S1i** (1 equiv) was reduced to **S2i** using  $\text{LiAlH}_4$  (285 mg, 7.5 mmol, 1.5 equiv) and THF (10 mL, 0.50 M). The crude material was purified by column chromatography (10% EtOAc in hexanes) to afford **S2i** as a yellow oil (717 mg, 49% yield).

$^1\text{H NMR}$  (500 MHz,  $\text{CDCl}_3$ )  $\delta$  7.11 (d,  $J = 8.2$  Hz, 2H), 6.84 (d,  $J = 8.3$  Hz, 2H), 4.81 (s, 1H), 4.80 (s, 1H), 3.80 (s, 3H), 3.53 (s, 2H), 2.58 (t,  $J = 11.3$  Hz, 2H), 2.16 – 1.91 (m, 5H), 1.35 (s, 3H), 1.27 (s, 6H), 0.89 (t,  $J = 6.4$  Hz, 3H).  $^{13}\text{C NMR}$  (126 MHz,  $\text{CDCl}_3$ )  $\delta$  158.0, 148.8, 132.7, 130.2, 113.9, 111.0, 65.3, 55.4, 40.7, 38.5, 37.0, 35.8, 31.9, 29.2, 27.7, 22.8, 14.2. **IR** (ATR): 3351, 2925, 2855, 1612, 1511, 1441, 1244, 1176, 1035, 890  $\text{cm}^{-1}$ . **HRMS** calculated for  $\text{C}_{19}\text{H}_{30}\text{O}_2\text{Na}$   $[\text{M}+\text{Na}]^+$  313.2144, found 313.2131.

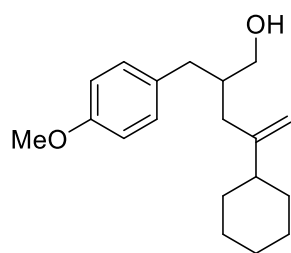

**4-cyclohexyl-2-(4-methoxybenzyl)pent-4-en-1-ol (S2j):** The title compound was prepared using the general procedures for ester alkylation and ester reduction starting from methyl 3-(4-methoxyphenyl)propanoate (311 mg, 1.6 mmol, 1 equiv),  $^i\text{Pr}_2\text{NH}$  (0.27 mL, 1.9 mmol, 1.2 equiv),  $^n\text{BuLi}$  (0.70 mL, 1.8 mmol, 1.1 equiv, 2.5 M in THF), (3-bromoprop-1-en-2-yl)cyclohexane<sup>[6]</sup> (488 mg, 2.4 mmol, 1.5 equiv), and THF (6.4 mL, 0.25 M). Crude **S1j** (1 equiv) was reduced to **S2j** using  $\text{LiAlH}_4$  (91.1 mg, 2.4 mmol, 1.5 equiv) and THF (3.2 mL, 0.50 M). The crude material was purified by column chromatography (10% EtOAc in hexanes) to afford **S2j** as a colorless oil (239 mg, 52% yield).

$^1\text{H NMR}$  (400 MHz,  $\text{CDCl}_3$ )  $\delta$  7.11 (d,  $J = 8.6$  Hz, 2H), 6.84 (d,  $J = 8.6$  Hz, 2H), 4.83 (s, 1H), 4.79 (s, 1H), 3.80 (s, 3H), 3.57 – 3.48 (m, 2H), 2.63 – 2.52 (m, 2H), 2.15 – 2.03 (m, 2H), 2.03 – 1.93 (m, 1H), 1.86 – 1.64 (m, 6H), 1.34 (s, 1H), 1.29 – 1.02 (m, 5H).  $^{13}\text{C NMR}$  (101 MHz,  $\text{CDCl}_3$ )  $\delta$  158.0, 154.0, 132.8, 130.2, 113.9, 109.0, 65.3, 55.4, 43.6, 41.1, 37.8, 37.0, 32.8, 32.5, 27.0, 26.9, 26.5. **IR** (ATR): 3357, 2922, 2850, 1611, 1511, 1447, 1244, 1176, 1034, 885  $\text{cm}^{-1}$ . **HRMS** calculated for  $\text{C}_{19}\text{H}_{28}\text{O}_2\text{Na}$   $[\text{M}+\text{Na}]^+$  311.1987, found 311.1990.

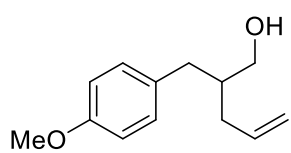

**2-(4-methoxybenzyl)pent-4-en-1-ol (S2k):** The title compound was prepared using the general procedures for ester alkylation and ester reduction starting from methyl 3-(4-methoxyphenyl)propanoate (1.9 g, 9.8 mmol, 1 equiv),  $^i\text{Pr}_2\text{NH}$  (1.7 mL, 11.8 mmol, 1.2 equiv),  $^n\text{BuLi}$  (4.3 mL, 10.8 mmol, 1.1 equiv, 2.5 M in THF), allyl bromide (1.0 mL, 11.8 mmol, 1.2 equiv), and THF (39 mL, 0.25 M). Crude **S1k** (1 equiv) was reduced to **S2k** using  $\text{LiAlH}_4$  (558 mg, 14.7 mmol, 1.5 equiv) and THF (20 mL, 0.50 M). The crude material was purified by column chromatography (10% EtOAc in hexanes) to afford **S2k** as a colorless oil (1.76 g, 87%

yield).  $^1\text{H NMR}$  (500 MHz,  $\text{CDCl}_3$ )  $\delta$  7.11 (d,  $J = 8.5$  Hz, 2H), 6.84 (d,  $J = 8.5$  Hz, 2H), 5.84 (ddt,  $J = 17.2, 10.2, 7.1$  Hz, 1H), 5.12 – 5.04 (m, 2H), 3.80 (s, 3H), 3.59 – 3.51 (m, 2H), 2.60 (dd,  $J = 7.2, 2.5$  Hz, 2H), 2.13 (t,  $J = 6.9$  Hz, 2H), 1.93 – 1.84 (m, 1H), 1.31 (s, 1H).  $^{13}\text{C NMR}$  (126 MHz,  $\text{CDCl}_3$ )  $\delta$  158.0, 137.1, 132.6, 130.2, 116.7, 113.9, 64.9, 55.4, 42.7, 36.5, 35.6. **IR** (ATR): 3353, 2913, 1510, 1243, 1176  $\text{cm}^{-1}$ . **HRMS** calculated for  $\text{C}_{13}\text{H}_{18}\text{O}_2\text{Na}$   $[\text{M}+\text{Na}]^+$  229.1205, found 229.1203.

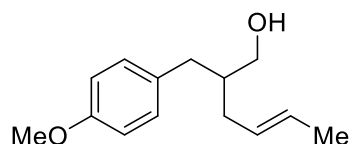

**(E)-2-(4-methoxybenzyl)hex-4-en-1-ol (S2I)**: The title compound was prepared using the general procedures for ester alkylation and ester reduction starting from methyl 3-(4-methoxyphenyl)propanoate (1.2 g, 6.0 mmol, 1 equiv),  $i\text{Pr}_2\text{NH}$  (1.0 mL, 7.2 mmol, 1.2 equiv),  $n\text{BuLi}$  (2.6 mL, 6.6 mmol, 1.1 equiv, 2.5 M in THF), crotyl bromide (1.2 g, 9.0 mmol, 1.5 equiv), and THF (24 mL, 0.25 M). Crude **S11** (1 equiv) was reduced to **S2I** using  $\text{LiAlH}_4$  (342 mg, 9.0 mmol, 1.5 equiv) and THF (12 mL, 0.50 M). The crude material was purified by column chromatography (10% EtOAc in hexanes) to afford **S2I** as a light yellow oil (613 mg, 46% yield).  $^1\text{H NMR}$  (400 MHz,  $\text{CDCl}_3$ )  $\delta$  7.10 (d,  $J = 8.7$  Hz, 2H), 6.84 (d,  $J = 8.6$  Hz, 2H), 5.54 – 5.40 (m, 2H), 3.80 (s, 3H), 3.54 (dd,  $J = 5.0, 2.6$  Hz, 2H), 2.57 (d,  $J = 7.2$  Hz, 2H), 2.09 – 2.01 (m, 2H), 1.89 – 1.77 (m, 1H), 1.68 (d,  $J = 4.8$  Hz, 3H), 1.29 (s, 1H).  $^{13}\text{C NMR}$  (101 MHz,  $\text{CDCl}_3$ )  $\delta$  158.0, 132.8, 130.2, 129.3, 127.2, 113.9, 65.1, 55.4, 43.0, 36.6, 34.4, 18.1. **IR** (ATR): 3358, 2915, 1611, 1511, 1244, 1177, 1034, 967  $\text{cm}^{-1}$ . **HRMS** calculated for  $\text{C}_{14}\text{H}_{20}\text{O}_2\text{Na}$   $[\text{M}+\text{Na}]^+$  243.1361, found 243.1369.

### General Procedure for Swern Oxidation of Alcohols S2

To an oven-dried round bottom flask was added oxalyl chloride (1.3 equiv) and  $\text{CH}_2\text{Cl}_2$  (0.60 M). The mixture was cooled  $-78$   $^\circ\text{C}$ , and DMSO (3 equiv) was added. The resulting mixture was stirred for 30 min. Alcohol **S2** (1 equiv) was added as a solution in  $\text{CH}_2\text{Cl}_2$  (0.60 M), and the resulting mixture was stirred for 30 min.  $\text{Et}_3\text{N}$  (5 equiv) was added, and the resulting mixture was allowed to warm to rt and stirred for 30 min. The reaction mixture was quenched with  $\text{H}_2\text{O}$  and extracted with  $\text{CH}_2\text{Cl}_2$  (3 x 15 mL). The combined organic layers were washed with brine, dried with anhydrous  $\text{MgSO}_4$ , and concentrated *in vacuo*. The residue was purified by column chromatography to afford aldehyde **1**.

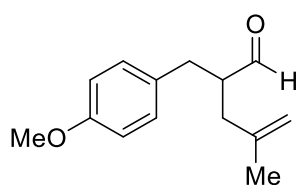

**2-(4-methoxybenzyl)-4-methylpent-4-enal (1a)**: The title compound was prepared following the general procedure for Swern oxidation using **S2a** (2.3 g, 10.3 mmol, 1 equiv), oxalyl chloride (1.1 mL, 13.3 mmol, 1.3 equiv), DMSO (2.2 mL, 31 mmol, 3 equiv),  $\text{Et}_3\text{N}$  (7.2 mL, 51.5 mmol, 5 equiv), and  $\text{CH}_2\text{Cl}_2$  (34.3 mL, 0.30 M). The crude material was purified by column chromatography (5% EtOAc in hexanes) to afford **1a** as a colorless oil (2.0 g, 88% yield).  $^1\text{H NMR}$  (400 MHz,  $\text{CDCl}_3$ )  $\delta$  9.66 (d,  $J = 2.6$  Hz, 1H), 7.09 (d,  $J = 8.8$  Hz, 2H), 6.83 (d,  $J = 8.7$  Hz, 2H), 4.84 (d,  $J = 1.4$  Hz, 1H), 4.75 (d,  $J = 0.5$  Hz, 1H), 3.79 (s, 3H), 2.90 (dd,  $J = 13.4, 7.4$  Hz, 1H), 2.79 (dddd,  $J = 13.4, 7.0, 6.2, 2.5$  Hz, 1H), 2.71 (dd,  $J = 13.4, 6.0$  Hz, 1H), 2.39 (dd,  $J = 14.8, 7.7$  Hz, 1H), 2.15 (dd,  $J = 14.8, 6.2$  Hz, 1H), 1.73 (d,  $J = 0.9$  Hz, 3H).  $^{13}\text{C NMR}$  (101 MHz,  $\text{CDCl}_3$ )  $\delta$  204.6, 158.4, 142.3, 130.8, 130.1, 114.1, 113.0, 55.4, 51.5, 37.2, 34.3, 22.6. **IR** (ATR): 2932, 2835, 1724, 1338, 1245, 907  $\text{cm}^{-1}$ . **HRMS** calculated for  $\text{C}_{14}\text{H}_{18}\text{O}_2\text{Na}$   $[\text{M}+\text{Na}]^+$  241.1205, found 241.1195.

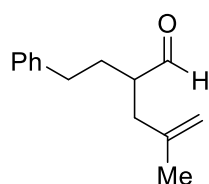

**4-methyl-2-phenethylpent-4-enal (1c)**: The title compound was prepared following the general procedure for Swern oxidation using **S2c** (1.2 g, 6.1 mmol, 1 equiv), oxalyl chloride (0.68 mL, 8.0 mmol, 1.3 equiv), DMSO (1.3 mL, 18.3 mmol, 3 equiv),  $\text{Et}_3\text{N}$  (4.3 mL, 30.6 mmol, 5 equiv), and  $\text{CH}_2\text{Cl}_2$  (20.4 mL, 0.30 M). The crude material was purified by column chromatography (5% EtOAc in hexanes) to afford **1c** as a light yellow oil (1.07 g, 87% yield).  $^1\text{H NMR}$  (400 MHz,  $\text{CDCl}_3$ )  $\delta$  9.63 (d,  $J = 2.7$  Hz, 1H), 7.30 (t,  $J = 7.4$  Hz, 2H), 7.20 (dd,  $J = 14.1, 7.3$  Hz, 3H), 4.82 (s, 1H), 4.73 (s, 1H), 2.75 – 2.57 (m, 2H), 2.57 – 2.47 (m, 1H), 2.42 (dd,  $J = 14.3, 7.6$  Hz, 1H), 2.19 (dd,  $J = 14.3, 6.9$  Hz, 1H), 2.03 – 1.90 (m, 1H), 1.82 – 1.72 (m, 1H), 1.69 (s, 3H).  $^{13}\text{C NMR}$  (101 MHz,  $\text{CDCl}_3$ )  $\delta$  204.7, 142.2, 141.5, 128.62, 128.56, 126.3, 113.1, 49.1, 37.5, 33.3, 30.5, 22.5. **IR** (ATR): 2927, 1727, 1651, 1495, 1454, 892  $\text{cm}^{-1}$ . **HRMS** calculated for  $\text{C}_{14}\text{H}_{18}\text{ONa}$   $[\text{M}+\text{Na}]^+$  225.1255, found 225.1250.

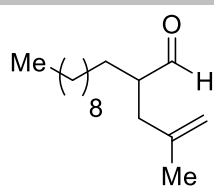

**2-(2-methylallyl)dodecanal (1e):** The title compound was prepared following the general procedure for Swern oxidation using **S2e** (1.5 g, 6.1 mmol, 1 equiv), oxalyl chloride (0.68 mL, 7.9 mmol, 1.3 equiv), DMSO (1.3 mL, 18.2 mmol, 3 equiv), Et<sub>3</sub>N (4.2 mL, 30.3 mmol, 5 equiv), and CH<sub>2</sub>Cl<sub>2</sub> (20 mL, 0.30 M). The crude material was purified by column chromatography (3% EtOAc in hexanes) to afford **1e** as a light yellow oil (1.38 g, 95% yield). <sup>1</sup>H NMR (400 MHz, CDCl<sub>3</sub>) δ 9.57 (d, *J* = 3.1 Hz, 1H), 4.80 (s, 1H), 4.72 (s, 1H), 2.45 (ddd, *J* = 11.1, 7.2, 3.1 Hz, 1H), 2.37 (dd, *J* = 14.4, 7.9 Hz, 1H), 2.13 (dd, *J* = 14.3, 6.3 Hz, 1H), 1.72 (s, 3H), 1.26 (s, 18H), 0.89 (t, *J* = 6.8 Hz, 3H). <sup>13</sup>C NMR (101 MHz, CDCl<sub>3</sub>) δ 205.2, 142.6, 112.7, 49.9, 37.5, 32.0, 29.8, 29.72, 29.70, 29.6, 29.5, 29.1, 27.1, 22.8, 22.6, 14.2. IR (ATR): 2922, 2853, 1726, 1456, 1054, 891 cm<sup>-1</sup>. HRMS calculated for C<sub>16</sub>H<sub>30</sub>ONH<sub>4</sub> [M+NH<sub>4</sub>]<sup>+</sup> 256.2640, found 256.2633.

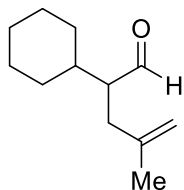

**2-cyclohexyl-4-methylpent-4-enal (1f):** The title compound was prepared following the general procedure for Swern oxidation using **S2f** (1.2 g, 6.6 mmol, 1 equiv), oxalyl chloride (0.73 mL, 8.5 mmol, 1.3 equiv), DMSO (1.4 mL, 19.7 mmol, 3 equiv), Et<sub>3</sub>N (4.6 mL, 32.8 mmol, 5 equiv), and CH<sub>2</sub>Cl<sub>2</sub> (22 mL, 0.30 M). The crude material was purified by column chromatography (3% EtOAc in hexanes) to afford **1f** as a light yellow oil (1.13 g, 95% yield). <sup>1</sup>H NMR (400 MHz, CDCl<sub>3</sub>) δ 9.60 (d, *J* = 3.5 Hz, 1H), 4.77 (s, 1H), 4.69 (s, 1H), 2.40 (dd, *J* = 13.9, 9.6 Hz, 1H), 2.31 (dt, *J* = 9.4, 3.9 Hz, 1H), 2.21 (dd, *J* = 14.0, 4.1 Hz, 1H), 1.81 – 1.59 (m, 9H), 1.32 – 1.18 (m, 2H), 1.18 – 1.03 (m, 3H). <sup>13</sup>C NMR (101 MHz, CDCl<sub>3</sub>) δ 205.6, 143.2, 112.4, 55.4, 38.7, 34.7, 30.6, 30.5, 26.60, 26.55, 26.4, 22.7. IR (ATR): 2923, 2852, 2705, 1724, 889 cm<sup>-1</sup>. HRMS calculated for C<sub>12</sub>H<sub>20</sub>O [M]<sup>+</sup> 180.1514, found 180.1521.

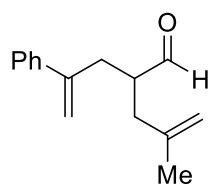

**4-methyl-2-(2-phenylallyl)pent-4-enal (1g):** The title compound was prepared following the general procedure for Swern oxidation using **S2g** (1.2 g, 5.5 mmol, 1 equiv), oxalyl chloride (0.61 mL, 7.1 mmol, 1.3 equiv), DMSO (1.2 mL, 16.4 mmol, 3 equiv), Et<sub>3</sub>N (3.8 mL, 27.4 mmol, 5 equiv), and CH<sub>2</sub>Cl<sub>2</sub> (18 mL, 0.30 M). The crude material was purified by column chromatography (5% EtOAc in hexanes) to afford **1g** as a light yellow oil (911 mg, 78% yield). <sup>1</sup>H NMR (400 MHz, CDCl<sub>3</sub>) δ 9.61 (d, *J* = 2.5 Hz, 1H), 7.42 – 7.28 (m, 5H), 5.34 (s, 1H), 5.12 (d, *J* = 1.0 Hz, 1H), 4.82 (s, 1H), 4.71 (s, 1H), 2.86 (dd, *J* = 14.2, 7.5 Hz, 1H), 2.61 (ddd, *J* = 14.1, 10.1, 4.4 Hz, 2H), 2.36 (dd, *J* = 14.4, 7.5 Hz, 1H), 2.18 (dd, *J* = 14.4, 6.1 Hz, 1H), 1.64 (s, 3H). <sup>13</sup>C NMR (101 MHz, CDCl<sub>3</sub>) δ 204.5, 145.6, 142.2, 140.5, 128.6, 127.9, 126.4, 115.2, 113.3, 47.6, 37.3, 35.0, 22.5. IR (ATR): 2934, 1723, 1627, 1443, 1376, 1302 cm<sup>-1</sup>. HRMS calculated for C<sub>15</sub>H<sub>18</sub>ONH<sub>4</sub> [M+NH<sub>4</sub>]<sup>+</sup> 232.1701, found 232.1703.

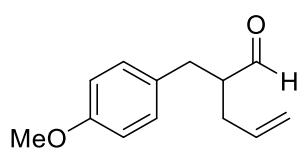

**2-(4-methoxybenzyl)pent-4-enal (1k):** The title compound was prepared following the general procedure for Swern oxidation using **S2k** (1.04 g, 5.0 mmol, 1 equiv), oxalyl chloride (0.56 mL, 6.5 mmol, 1.3 equiv), DMSO (1.1 mL, 15.1 mmol, 3 equiv), Et<sub>3</sub>N (3.5 mL, 25 mmol, 5 equiv), and CH<sub>2</sub>Cl<sub>2</sub> (17 mL, 0.30 M). The crude material was purified by column chromatography (5% EtOAc in hexanes) to afford **1k** as a colorless oil (929 mg, 91% yield). <sup>1</sup>H NMR (400 MHz, CDCl<sub>3</sub>) δ 9.70 (s, 1H), 7.09 (d, *J* = 8.4 Hz, 2H), 6.84 (d, *J* = 8.5 Hz, 2H), 5.83 – 5.71 (m, 1H), 5.12 – 5.06 (m, 2H), 3.79 (s, 3H), 2.95 (dd, *J* = 13.1, 6.2 Hz, 1H), 2.75 – 2.66 (m, 2H), 2.46 – 2.35 (m, 1H), 2.28 (dd, *J* = 13.2, 7.4 Hz, 1H). <sup>13</sup>C NMR (101 MHz, CDCl<sub>3</sub>) δ 204.4, 158.4, 134.9, 130.7, 130.1, 117.7, 114.1, 55.4, 53.1, 33.8, 32.8. IR (ATR): 2913, 2835, 1723, 1511, 1244 cm<sup>-1</sup>. HRMS calculated for C<sub>13</sub>H<sub>16</sub>O<sub>2</sub>Na [M+Na]<sup>+</sup> 227.1048, found 227.1044.

#### General Procedure for Oxidation of Alcohols with IBX

To a round bottom flask was added alcohol **S2** (1 equiv) and DMSO (0.25 M). IBX<sup>[7]</sup> (1.1–1.2 equiv) was added, and the resulting mixture was stirred at rt for 2 h. The reaction mixture was quenched with H<sub>2</sub>O and filtered. The filtrate was extracted with CH<sub>2</sub>Cl<sub>2</sub> (3 x 15 mL). The combined organic layers were washed with brine, dried with anhydrous MgSO<sub>4</sub>, and concentrated *in vacuo*. The residue was purified by column chromatography to afford aldehyde **1**.



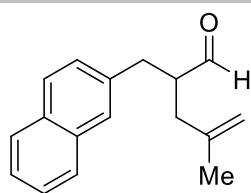

**4-methyl-2-(naphthalen-2-ylmethyl)pent-4-enal (1b):** The title compound was prepared following the general oxidation procedure with IBX using **S2b** (889 mg, 3.7 mmol, 1 equiv), IBX (1.2 g, 4.4 mmol, 1.2 equiv), and DMSO (15 mL, 0.25 M). The crude material was purified by column chromatography (5% EtOAc in hexanes) to afford **1b** as a colorless oil (758 mg, 86% yield). **<sup>1</sup>H NMR** (400 MHz, CDCl<sub>3</sub>) δ 9.72 (d, *J* = 2.4 Hz, 1H), 7.85 – 7.75 (m, 3H), 7.63 (s, 1H), 7.51 – 7.41 (m, 2H), 7.31 (dd, *J* = 8.4, 1.8 Hz, 1H), 4.87 (s, 1H), 4.78 (s, 1H), 3.14 (td, *J* = 9.9, 3.7 Hz, 1H), 3.00 – 2.88 (m, 2H), 2.49 – 2.40 (m, 1H), 2.21 (dd, *J* = 14.8, 5.7 Hz, 1H), 1.74 (s, 3H). **<sup>13</sup>C NMR** (126 MHz, CDCl<sub>3</sub>) δ 204.4, 142.2, 136.4, 133.7, 132.4, 128.4, 127.8, 127.66, 127.65, 127.5, 126.3, 125.7, 113.2, 51.2, 37.3, 35.3, 22.6. **IR** (ATR): 2932, 1723, 1599, 1507, 891 cm<sup>-1</sup>. **HRMS** calculated for C<sub>17</sub>H<sub>18</sub>ONa [M+Na]<sup>+</sup> 261.1255, found 261.1258.

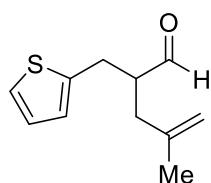

**4-methyl-2-(thiophen-2-ylmethyl)pent-4-enal (1d):** The title compound was prepared following the general oxidation procedure with IBX using **S2d** (766 mg, 3.9 mmol, 1 equiv), IBX (1.31 g, 4.7 mmol, 1.2 equiv), and DMSO (16 mL, 0.25 M). The crude material was purified by column chromatography (5% EtOAc in hexanes) to afford **1d** as a colorless oil (705 mg, 93% yield). **<sup>1</sup>H NMR** (400 MHz, CDCl<sub>3</sub>) δ 9.71 (d, *J* = 2.1 Hz, 1H), 7.15 (d, *J* = 5.1 Hz, 1H), 6.92 (dd, *J* = 5.1, 3.5 Hz, 1H), 6.81 (d, *J* = 3.3 Hz, 1H), 4.88 (s, 1H), 4.78 (s, 1H), 3.19 (dd, *J* = 15.1, 7.7 Hz, 1H), 3.01 (dd, *J* = 15.1, 5.8 Hz, 1H), 2.85 (qd, *J* = 7.7, 2.1 Hz, 1H), 2.43 (dd, *J* = 14.7, 7.6 Hz, 1H), 2.22 (dd, *J* = 14.7, 7.1 Hz, 1H), 1.75 (s, 3H). **<sup>13</sup>C NMR** (101 MHz, CDCl<sub>3</sub>) δ 203.8, 141.9, 141.2, 127.1, 126.0, 124.1, 113.5, 51.3, 37.1, 28.9, 22.5. **IR** (ATR): 3074, 2915, 1723, 1438, 893 cm<sup>-1</sup>. **HRMS** calculated for C<sub>11</sub>H<sub>14</sub>OSNa [M+Na]<sup>+</sup> 217.0663, found 217.0669.

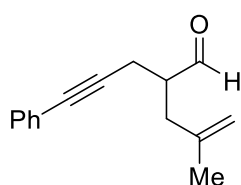

**4-methyl-2-(3-phenylprop-2-yn-1-yl)pent-4-enal (1h):** The title compound was prepared following the general oxidation procedure with IBX using **S2h** (310 mg, 1.5 mmol, 1 equiv), IBX (508 mg, 1.8 mmol, 1.2 equiv), and DMSO (6 mL, 0.25 M). The crude material was purified by column chromatography (5% EtOAc in hexanes) to afford **1h** as a yellow oil (258 mg, 81% yield). **<sup>1</sup>H NMR** (400 MHz, CDCl<sub>3</sub>) δ 9.81 (d, *J* = 1.6 Hz, 1H), 7.39 (ddd, *J* = 7.0, 4.9, 3.5 Hz, 2H), 7.32 – 7.27 (m, 3H), 4.91 – 4.87 (m, 1H), 4.85 – 4.81 (m, 1H), 2.75 (dddd, *J* = 7.9, 7.2, 5.1, 1.6 Hz, 1H), 2.71 – 2.64 (m, 2H), 2.54 (dd, *J* = 14.4, 6.5 Hz, 1H), 2.39 (dd, *J* = 14.6, 7.3 Hz, 1H), 1.79 (s, 3H). **<sup>13</sup>C NMR** (101 MHz, CDCl<sub>3</sub>) δ 203.3, 141.7, 131.7, 128.4, 128.1, 123.5, 113.6, 86.3, 82.9, 48.5, 36.6, 22.5, 19.0. **IR** (ATR): 3076, 2932, 1726, 1650, 1598, 1375, 1069 cm<sup>-1</sup>. **HRMS** calculated for C<sub>15</sub>H<sub>16</sub>ONa [M+Na]<sup>+</sup> 235.1099, found 235.1105.

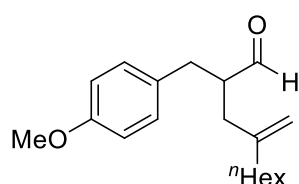

**2-(4-methoxybenzyl)-4-methylenedecanal (1i):** The title compound was prepared following the general oxidation procedure with IBX using **S2i** (500 mg, 1.7 mmol, 1 equiv), IBX (560 mg, 2.0 mmol, 1.1 equiv), and DMSO (7 mL, 0.25 M). The crude material was purified by column chromatography (5% EtOAc in hexanes) to afford **1i** as a light yellow oil (229 mg, 46% yield). **<sup>1</sup>H NMR** (500 MHz, CDCl<sub>3</sub>) δ 9.65 (d, *J* = 2.4 Hz, 1H), 7.08 (d, *J* = 8.3 Hz, 2H), 6.83 (d, *J* = 8.4 Hz, 2H), 4.84 (s, 1H), 4.76 (s, 1H), 3.79 (s, 3H), 2.90 (dd, *J* = 13.6, 7.6 Hz, 1H), 2.78 (s, 1H), 2.71 (dd, *J* = 13.7, 5.9 Hz, 1H), 2.38 (dd, *J* = 14.8, 8.2 Hz, 1H), 2.14 (dd, *J* = 14.8, 5.9 Hz, 1H), 1.99 (t, *J* = 7.4 Hz, 2H), 1.38 (s, 2H), 1.27 (s, 6H), 0.89 (t, *J* = 6.3 Hz, 3H). **<sup>13</sup>C NMR** (126 MHz, CDCl<sub>3</sub>) δ 204.7, 158.4, 146.4, 130.8, 130.1, 114.1, 111.7, 55.4, 51.6, 36.1, 35.4, 34.4, 31.9, 29.1, 27.7, 22.7, 14.2. **IR** (ATR): 2927, 2855, 1725, 1612, 1512, 1442, 1246, 1177, 1036, 895 cm<sup>-1</sup>. **HRMS** calculated for C<sub>19</sub>H<sub>28</sub>O<sub>2</sub>Na [M+Na]<sup>+</sup> 311.1987, found 311.1985.

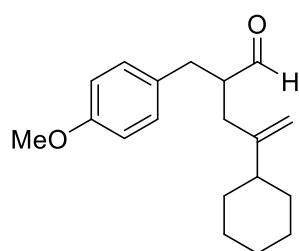

**4-cyclohexyl-2-(4-methoxybenzyl)pent-4-enal (1j):** The title compound was prepared following the general oxidation procedure with IBX using **S2j** (238 mg, 0.83 mmol, 1 equiv), IBX (254 mg, 0.91 mmol, 1.1 equiv), and DMSO (3.3 mL, 0.25 M). The crude material was purified by column chromatography (5% EtOAc in hexanes) to afford **1j** as a colorless oil (165 mg, 70% yield). **<sup>1</sup>H NMR** (400 MHz, CDCl<sub>3</sub>) δ 9.64 (d, *J* = 2.6 Hz, 1H), 7.08 (d, *J* = 8.7 Hz, 2H), 6.83 (d, *J* = 8.7 Hz, 2H), 4.85 (s, 1H), 4.74 (s, 1H), 3.79 (s, 3H), 2.89 (dd, *J* = 13.3, 7.5 Hz, 1H), 2.80 (tdd, *J* = 13.5, 7.1, 2.6 Hz, 1H), 2.72 (dd, *J* = 13.3, 5.9 Hz, 1H), 2.41 (dd, *J* = 15.3, 7.9 Hz, 1H), 2.16 (dd, *J* = 15.3, 6.0 Hz, 1H), 1.83 – 1.64 (m, 6H), 1.32 – 1.06 (m, 5H). **<sup>13</sup>C NMR** (101 MHz, CDCl<sub>3</sub>) δ 204.9, 158.4, 151.7, 130.8, 130.1, 114.1, 109.7, 55.4, 51.8, 44.2, 34.6, 34.5, 32.52, 32.48, 26.87, 26.85, 26.4. **IR** (ATR): 2924, 2851, 1724, 1612, 1512, 1446, 1245, 1177, 1035, 887 cm<sup>-1</sup>. **HRMS** calculated for C<sub>19</sub>H<sub>26</sub>O<sub>2</sub>Na [M+Na]<sup>+</sup> 309.1830, found 309.1817.

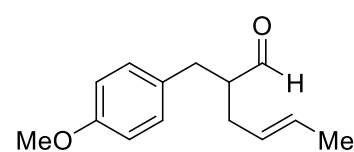

**(E)-2-(4-methoxybenzyl)hex-4-enal (1I):** The title compound was prepared following the general oxidation procedure with IBX using **S2I** (613 mg, 2.8 mmol, 1 equiv), IBX (856 mg, 3.1 mmol, 1.1 equiv), and DMSO (12 mL, 0.25 M). The crude material was purified by column chromatography (5% EtOAc in hexanes) to afford **1I** as a colorless oil (340 mg, 56% yield, 10:1 *E:Z*). <sup>1</sup>H NMR (400 MHz, CDCl<sub>3</sub>) δ 9.68 (d, *J* = 2.1 Hz, 1H), 7.08 (d, *J* = 8.6 Hz, 2H), 6.83 (d, *J* = 8.6 Hz, 2H), 5.51 (dq, *J* = 13.8, 6.3 Hz, 1H), 5.37 (dtd, *J* = 8.4, 6.9, 1.5 Hz, 1H), 3.79 (s, 3H), 2.93 (dd, *J* = 13.8, 7.0 Hz, 1H), 2.74 – 2.58 (m, 2H), 2.32 (dt, *J* = 14.2, 7.0 Hz, 1H), 2.26 – 2.16 (m, 1H), 1.66 (dd, *J* = 6.3, 1.3 Hz, 3H). <sup>13</sup>C NMR (101 MHz, CDCl<sub>3</sub>) δ 204.8, 158.3, 131.0, 130.1, 128.4, 127.2, 114.1, 55.4, 53.6, 33.8, 31.8, 18.1. IR (ATR): 2916, 2836, 1723, 1612, 1512, 1441, 1244, 1177, 1034, 967 cm<sup>-1</sup>. HRMS calculated for C<sub>14</sub>H<sub>18</sub>O<sub>2</sub>Na [M+Na]<sup>+</sup> 241.1205, found 241.1220.

### Preparation of Aldehydes 5

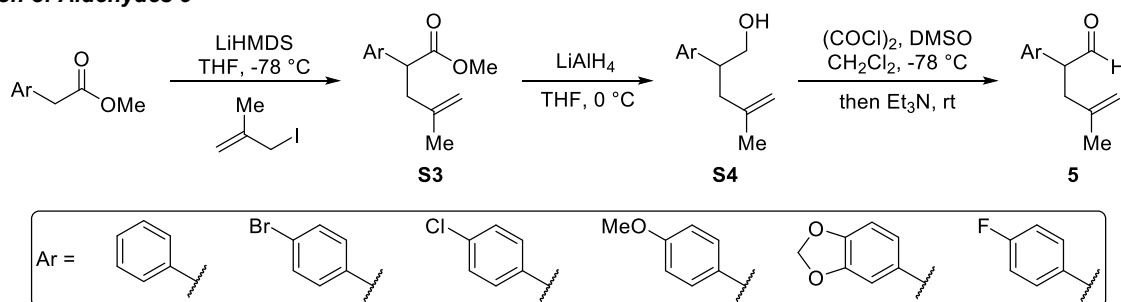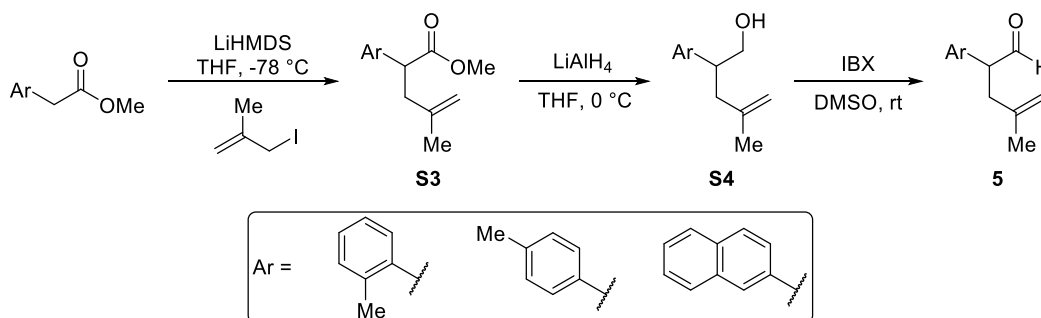

### General Procedure for Ester Alkylation

To an oven-dried round bottom flask was added the appropriate ester and THF (0.25 M), and the resulting solution was cooled to -78 °C. Then, LiHMDS (1.1 equiv, 1.0 M in THF) was added dropwise, and the resulting mixture was stirred for 1 h. A solution of the methylallyl iodide (1.2 equiv) was added dropwise, and the resulting mixture was stirred for 1 h. The reaction was quenched with saturated aqueous NH<sub>4</sub>Cl and extracted with EtOAc (3 x 20 mL). The combined organic layers were washed with brine, dried with anhydrous MgSO<sub>4</sub>, and concentrated *in vacuo*. The alkylated ester **S3** was used without further purification.

### General Procedure for Ester Reduction

The crude alkylated ester **S3** was dissolved in THF (0.25 M), and the resulting solution was cooled to 0 °C. LiAlH<sub>4</sub> (1.5 equiv) was added portionwise, and the resulting mixture was stirred for 30 min. The reaction was quenched using the Fieser method, filtered through celite, and concentrated *in vacuo*. The residue was purified by column chromatography to afford alcohol **S4**.

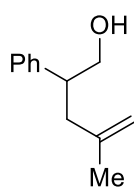

**4-methyl-2-phenylpent-4-en-1-ol (S4a):** The title compound was prepared using the general procedures for ester alkylation and ester reduction starting from methyl 2-phenylacetate (3.0 g, 20 mmol, 1 equiv), LiHMDS (1.0 M in THF, 22 mL, 22 mmol, 1.1 equiv), methylallyl iodide (4.4 g, 24 mmol, 1.2 equiv), and THF (80 mL, 0.25 M). Crude **S3a** (1 equiv) was reduced to **S4a** using LiAlH<sub>4</sub> (1.1 g, 30 mmol, 1.5 equiv) and THF (40 mL, 0.50 M). The crude material

was purified by column chromatography (10% EtOAc in hexanes) to afford **S4a** as a colorless oil (2.33 g, 66% yield).  $^1\text{H NMR}$  (400 MHz,  $\text{CDCl}_3$ )  $\delta$  7.34 (dd,  $J = 9.7, 5.5$  Hz, 2H), 7.28 – 7.19 (m, 3H), 4.73 (s, 1H), 4.68 (s, 1H), 3.76 (ddd,  $J = 18.3, 10.9, 6.6$  Hz, 2H), 3.10 – 2.98 (m, 1H), 2.48 (dd,  $J = 14.1, 7.3$  Hz, 1H), 2.35 (dd,  $J = 14.1, 7.9$  Hz, 1H), 1.72 (s, 3H), 1.51 (s, 1H).  $^{13}\text{C NMR}$  (101 MHz,  $\text{CDCl}_3$ )  $\delta$  143.5, 142.3, 128.7, 128.1, 126.9, 112.5, 67.4, 46.4, 40.9, 22.5. **IR** (ATR): 3355, 3073, 2928, 1649, 1494, 1452, 1066, 1030, 886, 756  $\text{cm}^{-1}$ . **HRMS** calculated for  $\text{C}_{12}\text{H}_{16}\text{ONH}_4$   $[\text{M}+\text{NH}_4]^+$  194.1545, found 194.1537.

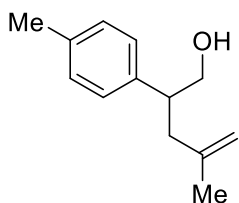

**4-methyl-2-(p-tolyl)pent-4-en-1-ol (S4b):** The title compound was prepared using the general procedures for ester alkylation and ester reduction starting from methyl 2-(p-tolyl)acetate (1.6 g, 10 mmol, 1 equiv), LiHMDS (1.0 M in THF, 11 mL, 11 mmol, 1.1 equiv), methallyl iodide (2.2 g, 12 mmol, 1.2 equiv), and THF (40 mL, 0.25 M). Crude **S3b** (1 equiv) was reduced to **S4b** using  $\text{LiAlH}_4$  (569 mg, 15 mmol, 1.5 equiv) and THF (20 mL, 0.50 M). The crude material was purified by column chromatography (10% EtOAc in hexanes) to afford **S4b** as a colorless oil (1.42 g, 75% yield).  $^1\text{H NMR}$  (400 MHz,  $\text{CDCl}_3$ )  $\delta$  7.18 – 7.09 (m, 4H), 4.75 – 4.71 (m, 1H), 4.68 (dd,  $J = 2.0, 0.9$  Hz, 1H), 3.77 (dd,  $J = 10.8, 5.6$  Hz, 1H), 3.70 (dd,  $J = 10.8, 7.6$  Hz, 1H), 3.01 (qd,  $J = 7.6, 5.7$  Hz, 1H), 2.46 (dd,  $J = 14.0, 7.2$  Hz, 1H), 2.38 – 2.28 (m, 4H), 1.72 (s, 3H), 1.42 (s, 1H).  $^{13}\text{C NMR}$  (101 MHz,  $\text{CDCl}_3$ )  $\delta$  143.7, 139.1, 136.4, 129.5, 128.0, 112.4, 67.5, 45.9, 40.9, 22.5, 21.2. **IR** (ATR): 3356, 2922, 1650, 1514, 1445, 1374, 1066, 1034, 885, 811  $\text{cm}^{-1}$ . **HRMS** calculated for  $\text{C}_{13}\text{H}_{18}\text{ONa}$   $[\text{M}+\text{Na}]^+$  213.1255, found 213.1245.

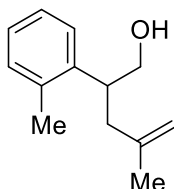

**4-methyl-2-(o-tolyl)pent-4-en-1-ol (S4c):** The title compound was prepared using the general procedures for ester alkylation and ester reduction starting from methyl 2-(o-tolyl)acetate (1.6 g, 10 mmol, 1 equiv), LiHMDS (1.0 M in THF, 11 mL, 11 mmol, 1.1 equiv), methallyl iodide (2.2 g, 12 mmol, 1.2 equiv), and THF (40 mL, 0.25 M). Crude **S3c** (1 equiv) was reduced to **S4c** using  $\text{LiAlH}_4$  (569 mg, 15 mmol, 1.5 equiv) and THF (20 mL, 0.50 M). The crude material was purified by column chromatography (10% EtOAc in hexanes) to afford **S4c** as a colorless oil (1.15 g, 61% yield).  $^1\text{H NMR}$  (400 MHz,  $\text{CDCl}_3$ )  $\delta$  7.24 – 7.16 (m, 3H), 7.16 – 7.09 (m, 1H), 4.76 – 4.72 (m, 1H), 4.70 (dd,  $J = 2.0, 0.9$  Hz, 1H), 3.77 (qd,  $J = 10.9, 6.5$  Hz, 2H), 3.45 – 3.32 (m, 1H), 2.50 – 2.42 (m, 1H), 2.39 (s, 3H), 2.33 (dd,  $J = 14.1, 7.3$  Hz, 1H), 1.74 (s, 3H), 1.45 (s, 1H).  $^{13}\text{C NMR}$  (101 MHz,  $\text{CDCl}_3$ )  $\delta$  143.9, 140.5, 136.8, 130.8, 126.49, 126.45, 126.1, 112.4, 67.0, 41.0, 40.9, 22.6, 19.9. **IR** (ATR): 3353, 3072, 2936, 1648, 1461, 1374, 1033, 886, 757, 726  $\text{cm}^{-1}$ . **HRMS** calculated for  $\text{C}_{13}\text{H}_{18}\text{ONH}_4$   $[\text{M}+\text{NH}_4]^+$  208.1701, found 208.1694.

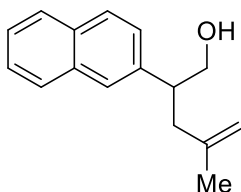

**4-methyl-2-(naphthalen-2-yl)pent-4-en-1-ol (S4d):** The title compound was prepared using the general procedures for ester alkylation and ester reduction starting from methyl 2-(naphthalen-2-yl)acetate (2.0 g, 10 mmol, 1 equiv), LiHMDS (1.0 M in THF, 11 mL, 11 mmol, 1.1 equiv), methallyl iodide (2.2 g, 12 mmol, 1.2 equiv), and THF (40 mL, 0.25 M). Crude **S3d** (1 equiv) was reduced to **S4d** using  $\text{LiAlH}_4$  (569 mg, 15 mmol, 1.5 equiv) and THF (20 mL, 0.50 M). The crude material was purified by column chromatography (10% EtOAc in hexanes) to afford **S4d** as a yellow oil (962 mg, 43% yield).  $^1\text{H NMR}$  (400 MHz,  $\text{CDCl}_3$ )  $\delta$  7.86 – 7.78 (m, 3H), 7.69 (s, 1H), 7.47 (dq,  $J = 8.4, 6.8, 1.6$  Hz, 2H), 7.39 (dd,  $J = 8.5, 1.7$  Hz, 1H), 4.75 – 4.64 (m, 2H), 3.85 (qd,  $J = 10.9, 6.6$  Hz, 2H), 3.30 – 3.14 (m, 1H), 2.56 (dd,  $J = 14.1, 7.2$  Hz, 1H), 2.46 (dd,  $J = 14.1, 8.0$  Hz, 1H), 1.75 (s, 3H), 1.41 (s, 1H).  $^{13}\text{C NMR}$  (101 MHz,  $\text{CDCl}_3$ )  $\delta$  143.5, 139.7, 133.7, 132.7, 128.5, 127.8, 127.0, 126.2, 126.1, 125.7, 112.7, 67.4, 46.6, 40.8, 22.6. **IR** (ATR): 3352, 2929, 1648, 1442, 1373, 1061, 1027, 887, 854, 815, 745  $\text{cm}^{-1}$ . **HRMS** calculated for  $\text{C}_{16}\text{H}_{18}\text{ONa}$   $[\text{M}+\text{Na}]^+$  249.1255, found 249.1257.

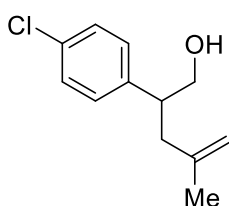

**2-(4-chlorophenyl)-4-methylpent-4-en-1-ol (S4e):** The title compound was prepared using the general procedures for ester alkylation and ester reduction starting from methyl 2-(4-chlorophenyl)acetate (1.43 g, 7.8 mmol, 1 equiv), LiHMDS (1.0 M in THF, 8.5 mL, 8.5 mmol, 1.1 equiv), methallyl iodide (1.70 g, 9.3 mmol, 1.2 equiv), and THF (31 mL, 0.25 M). Crude **S3e** (1 equiv) was reduced to **S4e** using  $\text{LiAlH}_4$  (442 mg, 11.6 mmol, 1.5 equiv) and THF (15.5 mL, 0.50 M). The crude material was purified by column chromatography (10% EtOAc in hexanes) to afford **S4e** as a colorless oil (1.31 g, 80% yield).  $^1\text{H NMR}$  (400 MHz,  $\text{CDCl}_3$ )  $\delta$  7.32 – 7.27 (m, 2H), 7.19 – 7.13 (m, 2H), 4.75 – 4.68 (m, 1H), 4.65 (dd,  $J = 2.0, 0.9$  Hz, 1H), 3.77 (dd,  $J = 10.9, 5.6$  Hz, 1H), 3.70 (dd,

$J = 10.9, 7.4$  Hz, 1H), 3.09 – 2.94 (m, 1H), 2.46 (dd,  $J = 14.1, 7.0$  Hz, 1H), 2.36 – 2.24 (m, 1H), 1.70 (s, 3H), 1.46 (s, 1H).  $^{13}\text{C NMR}$  (101 MHz,  $\text{CDCl}_3$ )  $\delta$  143.1, 140.8, 132.6, 129.5, 128.8, 112.8, 67.3, 45.8, 40.7, 22.5. **IR** (ATR): 3342, 2931, 1649, 1491, 1444, 1091, 1035, 1014, 889, 821  $\text{cm}^{-1}$ . **HRMS** calculated for  $\text{C}_{12}\text{H}_{15}\text{ClONH}_4$   $[\text{M}+\text{NH}_4]^+$  228.1155, found 228.1146.

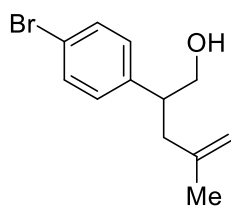

**2-(4-bromophenyl)-4-methylpent-4-en-1-ol (S4f):** The title compound was prepared using the general procedures for ester alkylation and ester reduction starting from methyl 2-(4-bromophenyl)acetate (1.83 g, 8.0 mmol, 1 equiv), LiHMDS (1.0 M in THF, 8.8 mL, 8.8 mmol, 1.1 equiv), methallyl iodide (1.75 g, 9.6 mmol, 1.2 equiv), and THF (32 mL, 0.25 M). Crude **S3f** (1 equiv) was reduced to **S4f** using  $\text{LiAlH}_4$  (455 mg, 12.0 mmol, 1.5 equiv) and THF (16 mL, 0.50 M). The crude material was purified by column chromatography (10% EtOAc in hexanes) to afford **S4f** as a colorless oil (1.74 g, 85% yield).  $^1\text{H NMR}$  (400 MHz,  $\text{CDCl}_3$ )  $\delta$  7.48 – 7.41 (m, 2H), 7.14 – 7.07 (m, 2H), 4.72 (d,  $J = 1.5$  Hz, 1H), 4.65 (dd,  $J = 1.9, 0.9$  Hz, 1H), 3.77 (dd,  $J = 10.9, 5.6$  Hz, 1H), 3.69 (dd,  $J = 10.9, 7.3$  Hz, 1H), 3.07 – 2.91 (m, 1H), 2.46 (dd,  $J = 14.1, 7.0$  Hz, 1H), 2.30 (dd,  $J = 14.1, 8.3$  Hz, 1H), 1.70 (s, 3H), 1.45 (s, 1H).  $^{13}\text{C NMR}$  (101 MHz,  $\text{CDCl}_3$ )  $\delta$  143.1, 141.4, 131.8, 129.9, 120.6, 112.8, 67.2, 45.9, 40.7, 22.5. **IR** (ATR): 3345, 2930, 1649, 1444, 1487, 1374, 1073, 1009, 889, 817  $\text{cm}^{-1}$ . **HRMS** calculated for  $\text{C}_{12}\text{H}_{15}\text{BrONH}_4$   $[\text{M}+\text{NH}_4]^+$  272.0650, found 272.0645.

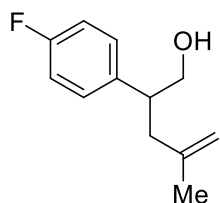

**2-(4-fluorophenyl)-4-methylpent-4-en-1-ol (S4g):** The title compound was prepared using the general procedures for ester alkylation and ester reduction starting from methyl 2-(4-fluorophenyl)acetate (1.27 g, 7.6 mmol, 1 equiv), LiHMDS (1.0 M in THF, 8.3 mL, 8.3 mmol, 1.1 equiv), methallyl iodide (1.65 g, 9.1 mmol, 1.2 equiv), and THF (30 mL, 0.25 M). Crude **S3g** (1 equiv) was reduced to **S4g** using  $\text{LiAlH}_4$  (429 mg, 11.3 mmol, 1.5 equiv) and THF (15.2 mL, 0.50 M). The crude material was purified by column chromatography (10% EtOAc in hexanes) to afford **S4g** as a colorless oil (1.29 g, 88% yield).  $^1\text{H NMR}$  (400 MHz,  $\text{CDCl}_3$ )  $\delta$  7.23 – 7.14 (m, 2H), 7.06 – 6.96 (m, 2H), 4.76 – 4.69 (m, 1H), 4.65 (dd,  $J = 2.0, 0.9$  Hz, 1H), 3.77 (dd,  $J = 10.8, 5.6$  Hz, 1H), 3.69 (dd,  $J = 10.8, 7.4$  Hz, 1H), 3.09 – 2.94 (m, 1H), 2.46 (dd,  $J = 14.1, 7.0$  Hz, 1H), 2.36 – 2.25 (m, 1H), 1.70 (s, 3H), 1.44 (s, 1H).  $^{13}\text{C NMR}$  (101 MHz,  $\text{CDCl}_3$ )  $\delta$  161.8 (d,  $J = 244.6$  Hz), 143.3, 137.9 (d,  $J = 3.2$  Hz), 129.5 (d,  $J = 7.8$  Hz), 115.5 (d,  $J = 21.1$  Hz), 112.7, 67.4, 45.7, 41.0, 22.5.  $^{19}\text{F NMR}$  (376 MHz,  $\text{CDCl}_3$ )  $\delta$  -116.6. **IR** (ATR): 3353, 2930, 1650, 1508, 1445, 1221, 1159, 1028, 889, 830  $\text{cm}^{-1}$ . **HRMS** calculated for  $\text{C}_{12}\text{H}_{15}\text{FONH}_4$   $[\text{M}+\text{NH}_4]^+$  212.1451, found 212.1455.

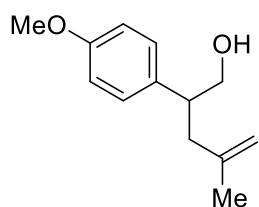

**2-(4-methoxyphenyl)-4-methylpent-4-en-1-ol (S4h):** The title compound was prepared using the general procedures for ester alkylation and ester reduction starting from methyl 2-(4-methoxyphenyl)acetate (1.33 g, 7.4 mmol, 1 equiv), LiHMDS (1.0 M in THF, 8.1 mL, 8.1 mmol, 1.1 equiv), methallyl iodide (1.61 g, 8.9 mmol, 1.2 equiv), and THF (30 mL, 0.25 M). Crude **S3h** (1 equiv) was reduced to **S4h** using  $\text{LiAlH}_4$  (421 mg, 11.1 mmol, 1.5 equiv) and THF (14.8 mL, 0.50 M). The crude material was purified by column chromatography (10% EtOAc in hexanes) to afford **S4h** as a colorless oil (1.29 g, 84% yield).  $^1\text{H NMR}$  (400 MHz,  $\text{CDCl}_3$ )  $\delta$  7.16 (d,  $J = 8.6$  Hz, 2H), 6.88 (d,  $J = 8.6$  Hz, 2H), 4.72 (s, 1H), 4.67 (s, 1H), 3.80 (s, 3H), 3.70 (dd,  $J = 24.8, 17.2$  Hz, 2H), 3.06 – 2.93 (m, 1H), 2.44 (dd,  $J = 14.0, 7.1$  Hz, 1H), 2.31 (dd,  $J = 14.1, 8.1$  Hz, 1H), 1.71 (s, 3H), 1.37 (s, 1H).  $^{13}\text{C NMR}$  (101 MHz,  $\text{CDCl}_3$ )  $\delta$  158.6, 143.7, 134.1, 129.0, 114.2, 112.5, 67.6, 55.4, 45.6, 41.0, 22.5. **IR** (ATR): 3377, 2932, 1611, 1511, 1442, 1245, 1178, 1033, 887, 827  $\text{cm}^{-1}$ . **HRMS** calculated for  $\text{C}_{13}\text{H}_{18}\text{O}_2\text{NH}_4$   $[\text{M}+\text{NH}_4]^+$  224.1651, found 224.1665.

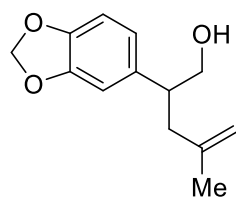

**2-(benzo[d][1,3]dioxol-5-yl)-4-methylpent-4-en-1-ol (S4i):** The title compound was prepared using the general procedures for ester alkylation and ester reduction starting from methyl 2-(benzo[d][1,3]dioxol-5-yl)acetate (1.04 g, 5.4 mmol, 1 equiv), LiHMDS (1.0 M in THF, 5.9 mL, 5.9 mmol, 1.1 equiv), methallyl iodide (1.17 g, 6.4 mmol, 1.2 equiv), and THF (21 mL, 0.25 M). Crude **S3i** (1 equiv) was reduced to **S4i** using  $\text{LiAlH}_4$  (305 mg, 8.0 mmol, 1.5 equiv) and THF (10.8 mL, 0.50 M). The crude material was purified by column chromatography (10% EtOAc in hexanes) to afford **S4i** as a colorless oil (942 mg, 80% yield).  $^1\text{H NMR}$  (400 MHz,  $\text{CDCl}_3$ )  $\delta$  6.75 (dd,  $J = 15.4, 4.8$  Hz, 2H), 6.68 (dd,  $J = 7.9, 1.5$  Hz, 1H), 5.94 (d,  $J = 0.5$  Hz, 2H), 4.73 (d,  $J = 1.5$  Hz, 1H), 4.67 (dd,  $J = 2.0, 0.9$  Hz, 1H), 3.74 (dd,  $J = 10.8, 5.5$  Hz, 1H), 3.65 (dd,  $J = 10.8, 7.7$  Hz, 1H), 2.96 (qd,  $J = 7.6, 5.6$  Hz, 1H), 2.41 (dd,  $J = 14.1, 7.0$  Hz, 1H), 2.27 (dd,  $J = 14.1, 8.2$  Hz, 1H), 1.70 (s, 3H), 1.48 (s, 1H).  $^{13}\text{C NMR}$  (101 MHz,  $\text{CDCl}_3$ )  $\delta$  148.0, 146.4,

143.4, 136.0, 121.3, 112.6, 108.5, 108.1, 101.0, 67.5, 46.2, 41.0, 22.5. **IR** (ATR): 3362, 2894, 1504, 1486, 1439, 1243, 1036, 935, 888, 808  $\text{cm}^{-1}$ . **HRMS** calculated for  $\text{C}_{13}\text{H}_{16}\text{O}_3\text{NH}_4$   $[\text{M}+\text{NH}_4]^+$  238.1443, found 238.1442.

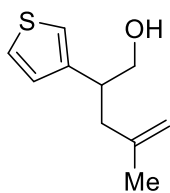

**4-methyl-2-(thiophen-3-yl)pent-4-en-1-ol (S4j)**: The title compound was prepared using the general procedures for ester alkylation and ester reduction starting from methyl 2-(thiophen-3-yl)acetate (1.08 g, 6.4 mmol, 1 equiv), LiHMDS (1.0 M in THF, 7.0 mL, 7.0 mmol, 1.1 equiv), methyl iodide (1.39 g, 7.6 mmol, 1.2 equiv), and THF (25 mL, 0.25 M). Crude **S3j** (1 equiv) was reduced to **S4j** using  $\text{LiAlH}_4$  (363 mg, 9.6 mmol, 1.5 equiv) and THF (12.8 mL, 0.50 M). The crude material was purified by column chromatography (10% EtOAc in hexanes) to afford **S4j** as a colorless oil (1.11 g, 96% yield).  **$^1\text{H NMR}$**  (400 MHz,  $\text{CDCl}_3$ )  $\delta$  7.31 (dd,  $J = 4.9, 2.9$  Hz, 1H), 7.06 (dd,  $J = 2.9, 0.9$  Hz, 1H), 7.01 (dd,  $J = 5.0, 1.3$  Hz, 1H), 4.76 (d,  $J = 1.4$  Hz, 1H), 4.70 (d,  $J = 1.0$  Hz, 1H), 3.77 (dd,  $J = 10.8, 5.3$  Hz, 1H), 3.68 (dd,  $J = 10.8, 7.1$  Hz, 1H), 3.18 (qd,  $J = 7.4, 5.4$  Hz, 1H), 2.45 (dd,  $J = 14.0, 7.5$  Hz, 1H), 2.34 (dd,  $J = 14.0, 7.7$  Hz, 1H), 1.72 (s, 3H), 1.56 (s, 1H).  **$^{13}\text{C NMR}$**  (101 MHz,  $\text{CDCl}_3$ )  $\delta$  143.5, 143.1, 127.0, 126.0, 121.3, 112.5, 66.9, 41.8, 40.8, 22.4. **IR** (ATR): 3361, 2929, 1647, 1444, 1374, 1064, 1027, 888, 775, 648  $\text{cm}^{-1}$ . **HRMS** calculated for  $\text{C}_{10}\text{H}_{14}\text{OSNH}_4$   $[\text{M}+\text{NH}_4]^+$  200.1109, found 200.1109.

#### General Procedure for Swern Oxidation of Alcohols

To an oven-dried round bottom flask was added oxalyl chloride (1.3 equiv) and  $\text{CH}_2\text{Cl}_2$  (0.60 M). The mixture was cooled to  $-78^\circ\text{C}$ , and DMSO (3 equiv) was added. The resulting mixture was stirred for 30 min. Alcohol **S4** (1 equiv) was added as a solution in  $\text{CH}_2\text{Cl}_2$  (0.60 M), and the resulting mixture was stirred for 30 min.  $\text{Et}_3\text{N}$  (5 equiv) was added, and the resulting mixture was allowed to warm to rt and stirred for 30 min. The reaction mixture was quenched with  $\text{H}_2\text{O}$  and extracted with  $\text{CH}_2\text{Cl}_2$  (3 x 15 mL). The combined organic layers were washed with brine, dried with anhydrous  $\text{MgSO}_4$ , and concentrated *in vacuo*. The residue was purified by column chromatography to afford aldehyde **5**.

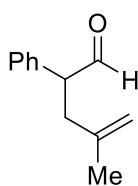

**4-methyl-2-phenylpent-4-enal (5a)**: The title compound was prepared following the general procedure for Swern oxidation using **S4a** (2.27 g, 13.0 mmol, 1 equiv), oxalyl chloride (1.4 mL, 16.9 mmol, 1.3 equiv), DMSO (2.8 mL, 39 mmol, 3 equiv),  $\text{Et}_3\text{N}$  (9.1 mL, 65 mmol, 5 equiv), and  $\text{CH}_2\text{Cl}_2$  (43 mL, 0.30 M). The crude material was purified by column chromatography (3% EtOAc in hexanes) to afford **5a** as a colorless oil (1.93 g, 85% yield).  **$^1\text{H NMR}$**  (400 MHz,  $\text{CDCl}_3$ )  $\delta$  9.69 (d,  $J = 2.2$  Hz, 1H), 7.41 – 7.34 (m, 2H), 7.33 – 7.28 (m, 1H), 7.24 – 7.20 (m, 2H), 4.78 – 4.72 (m, 1H), 4.69 – 4.61 (m, 1H), 3.76 (td,  $J = 7.5, 2.1$  Hz, 1H), 2.87 (dd,  $J = 14.8, 7.2$  Hz, 1H), 2.46 (dd,  $J = 14.9, 7.7$  Hz, 1H), 1.72 (s, 3H).  **$^{13}\text{C NMR}$**  (101 MHz,  $\text{CDCl}_3$ )  $\delta$  200.4, 142.1, 136.1, 129.2, 128.9, 127.8, 113.0, 57.3, 37.8, 22.8. **IR** (ATR): 2936, 2714, 1720, 1650, 1492, 1453, 1076, 891, 755, 698  $\text{cm}^{-1}$ . **HRMS** calculated for  $\text{C}_{12}\text{H}_{14}\text{ONa}$   $[\text{M}+\text{Na}]^+$  197.0942, found 197.0946.

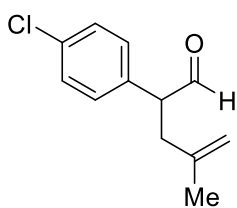

**2-(4-chlorophenyl)-4-methylpent-4-enal (5e)**: The title compound was prepared following the general procedure for Swern oxidation using **S4e** (1.27 g, 6.0 mmol, 1 equiv), oxalyl chloride (0.67 mL, 7.8 mmol, 1.3 equiv), DMSO (1.3 mL, 18 mmol, 3 equiv),  $\text{Et}_3\text{N}$  (4.2 mL, 30 mmol, 5 equiv), and  $\text{CH}_2\text{Cl}_2$  (20 mL, 0.30 M). The crude material was purified by column chromatography (3% EtOAc in hexanes) to afford **5e** as a light yellow oil (539 mg, 43% yield).  **$^1\text{H NMR}$**  (400 MHz,  $\text{CDCl}_3$ )  $\delta$  9.66 (d,  $J = 2.0$  Hz, 1H), 7.39 – 7.30 (m, 2H), 7.18 – 7.10 (m, 2H), 4.76 (d,  $J = 1.4$  Hz, 1H), 4.65 (s, 1H), 3.79 – 3.68 (m, 1H), 2.83 (dd,  $J = 14.8, 6.9$  Hz, 1H), 2.43 (ddd,  $J = 14.8, 8.2, 0.8$  Hz, 1H), 1.70 (s, 3H).  **$^{13}\text{C NMR}$**  (101 MHz,  $\text{CDCl}_3$ )  $\delta$  199.8, 141.7, 134.6, 133.8, 130.2, 129.3, 113.3, 56.6, 37.8, 22.7. **IR** (ATR): 2936, 1722, 1650, 1491, 1445, 1376, 1093, 1014, 893, 820  $\text{cm}^{-1}$ . **HRMS** calculated for  $\text{C}_{12}\text{H}_{13}\text{ClONH}_4$   $[\text{M}+\text{NH}_4]^+$  226.0999, found 226.0988.

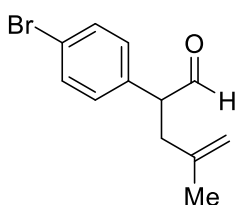

**2-(4-bromophenyl)-4-methylpent-4-enal (5f)**: The title compound was prepared following the general procedure for Swern oxidation using **S4f** (1.70 g, 6.7 mmol, 1 equiv), oxalyl chloride (0.74 mL, 8.7 mmol, 1.3 equiv), DMSO (1.4 mL, 20 mmol, 3 equiv),  $\text{Et}_3\text{N}$  (4.6 mL, 33 mmol, 5 equiv), and  $\text{CH}_2\text{Cl}_2$  (22 mL, 0.30 M). The crude material was purified by column chromatography (3% EtOAc in hexanes) to afford **5f** as a light yellow oil (1.15 g, 68% yield).  **$^1\text{H NMR}$**  (400 MHz,  $\text{CDCl}_3$ )  $\delta$  9.66 (d,  $J = 2.0$  Hz, 1H), 7.55 – 7.44 (m, 2H), 7.13 – 7.02 (m, 2H), 4.76 (s, 1H), 4.65 (s, 1H), 3.77 – 3.67 (m, 1H), 2.83 (dd,  $J = 14.8, 6.9$  Hz, 1H), 2.43 (dd,  $J = 14.8, 8.2$  Hz, 1H), 1.70 (s, 3H).  **$^{13}\text{C NMR}$**  (101 MHz,  $\text{CDCl}_3$ )  $\delta$  199.7, 141.6, 135.1, 132.3, 130.6, 121.9, 113.4, 56.7,

37.8, 22.7. **IR** (ATR): 2936, 2819, 2719, 1721, 1650, 1488, 1073, 1010, 892, 816  $\text{cm}^{-1}$ . **HRMS** calculated for  $\text{C}_{12}\text{H}_{13}\text{BrONH}_4$   $[\text{M}+\text{NH}_4]^+$  270.0493, found 270.0505.

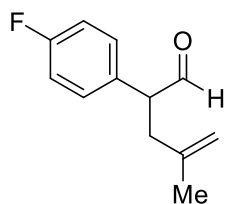

**2-(4-fluorophenyl)-4-methylpent-4-enal (5g)**: The title compound was prepared following the general procedure for Swern oxidation using **S4g** (1.29 g, 6.6 mmol, 1 equiv), oxalyl chloride (0.74 mL, 8.6 mmol, 1.3 equiv), DMSO (1.4 mL, 20 mmol, 3 equiv),  $\text{Et}_3\text{N}$  (4.6 mL, 33 mmol, 5 equiv), and  $\text{CH}_2\text{Cl}_2$  (22 mL, 0.30 M). The crude material was purified by column chromatography (3% EtOAc in hexanes) to afford **5g** as a colorless oil (1.13 g, 89% yield).  **$^1\text{H}$  NMR** (400 MHz,  $\text{CDCl}_3$ )  $\delta$  9.67 (d,  $J = 2.1$  Hz, 1H), 7.21 – 7.15 (m, 2H), 7.10 – 7.03 (m, 2H), 4.76 (d,  $J = 1.4$  Hz, 1H), 4.67 – 4.61 (m, 1H), 3.79 – 3.70 (m, 1H), 2.84 (dd,  $J = 14.8$ , 7.0 Hz, 1H), 2.42 (ddd,  $J = 14.8$ , 8.1, 0.8 Hz, 1H), 1.70 (s, 3H).  **$^{13}\text{C}$  NMR** (101 MHz,  $\text{CDCl}_3$ )  $\delta$  200.1 (d,  $J = 0.9$  Hz), 162.4 (d,  $J = 246.5$  Hz), 141.8, 131.8 (d,  $J = 3.3$  Hz), 130.4 (d,  $J = 8.1$  Hz), 116.1 (d,  $J = 21.4$  Hz), 113.2, 56.5, 37.9, 22.7.  **$^{19}\text{F}$  NMR** (376 MHz,  $\text{CDCl}_3$ )  $\delta$  -114.9. **IR** (ATR): 2938, 2722, 1722, 1650, 1508, 1445, 1223, 1160, 893, 831  $\text{cm}^{-1}$ . **HRMS** calculated for  $\text{C}_{12}\text{H}_{13}\text{FONH}_4$   $[\text{M}+\text{NH}_4]^+$  210.1294, found 210.1291.

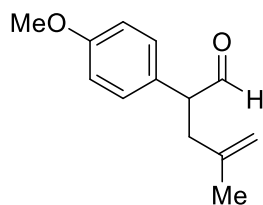

**2-(4-methoxyphenyl)-4-methylpent-4-enal (5h)**: The title compound was prepared following the general procedure for Swern oxidation using **S4h** (1.24 g, 6.0 mmol, 1 equiv), oxalyl chloride (0.67 mL, 7.8 mmol, 1.3 equiv), DMSO (1.3 mL, 18 mmol, 3 equiv),  $\text{Et}_3\text{N}$  (4.2 mL, 30 mmol, 5 equiv), and  $\text{CH}_2\text{Cl}_2$  (20 mL, 0.30 M). The crude material was purified by column chromatography (3% EtOAc in hexanes) to afford **5h** as a light yellow oil (432 mg, 35% yield).  **$^1\text{H}$  NMR** (400 MHz,  $\text{CDCl}_3$ )  $\delta$  9.64 (d,  $J = 2.2$  Hz, 1H), 7.17 – 7.09 (m, 2H), 6.94 – 6.87 (m, 2H), 4.78 – 4.72 (m, 1H), 4.69 – 4.63 (m, 1H), 3.81 (s, 3H), 3.70 (td,  $J = 7.6$ , 2.2 Hz, 1H), 2.82 (dd,  $J = 14.8$ , 7.1 Hz, 1H), 2.46 – 2.36 (m, 1H), 1.71 (s, 3H).  **$^{13}\text{C}$  NMR** (101 MHz,  $\text{CDCl}_3$ )  $\delta$  200.4, 159.2, 142.3, 129.9, 127.9, 114.6, 112.9, 56.5, 55.4, 37.8, 22.8. **IR** (ATR): 2936, 2836, 1720, 1609, 1511, 1248, 1178, 1032, 891, 827  $\text{cm}^{-1}$ .

**HRMS** calculated for  $\text{C}_{13}\text{H}_{16}\text{O}_2\text{NH}_4$   $[\text{M}+\text{NH}_4]^+$  222.1494, found 222.1496.

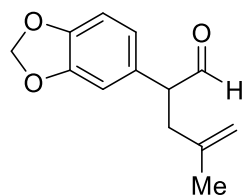

**2-(benzo[d][1,3]dioxol-5-yl)-4-methylpent-4-enal (5i)**: The title compound was prepared following the general procedure for Swern oxidation using **S4i** (903 mg, 4.1 mmol, 1 equiv), oxalyl chloride (0.46 mL, 5.3 mmol, 1.3 equiv), DMSO (0.87 mL, 12.3 mmol, 3 equiv),  $\text{Et}_3\text{N}$  (2.9 mL, 20.5 mmol, 5 equiv), and  $\text{CH}_2\text{Cl}_2$  (13.7 mL, 0.30 M). The crude material was purified by column chromatography (3% EtOAc in hexanes) to afford **5i** as a light yellow oil (303 mg, 34% yield).  **$^1\text{H}$  NMR** (400 MHz,  $\text{CDCl}_3$ )  $\delta$  9.63 (d,  $J = 2.1$  Hz, 1H), 6.81 (dd,  $J = 7.8$ , 0.5 Hz, 1H), 6.71 – 6.65 (m, 2H), 5.97 (s, 2H), 4.76 (d,  $J = 1.4$  Hz, 1H), 4.67

(d,  $J = 0.5$  Hz, 1H), 3.70 – 3.62 (m, 1H), 2.80 (dd,  $J = 15.1$ , 6.8 Hz, 1H), 2.40 (dd,  $J = 14.8$ , 8.0 Hz, 1H), 1.71 (d,  $J = 0.4$  Hz, 3H).  **$^{13}\text{C}$  NMR** (101 MHz,  $\text{CDCl}_3$ )  $\delta$  200.1, 148.4, 147.3, 142.1, 129.7, 122.3, 113.0, 109.0, 108.9, 101.3, 56.9, 37.8, 22.7. **IR** (ATR): 2898, 1721, 1504, 1485, 1441, 1244, 1037, 934, 895, 808  $\text{cm}^{-1}$ . **HRMS** calculated for  $\text{C}_{13}\text{H}_{14}\text{O}_3\text{NH}_4$   $[\text{M}+\text{NH}_4]^+$  236.1287, found 236.1287.

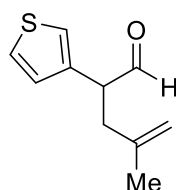

**4-methyl-2-(thiophen-3-yl)pent-4-enal (5j)**: The title compound was prepared following the general procedure for Swern oxidation using **S4j** (1.07 g, 5.9 mmol, 1 equiv), oxalyl chloride (0.65 mL, 7.6 mmol, 1.3 equiv), DMSO (1.2 mL, 17.5 mmol, 3 equiv),  $\text{Et}_3\text{N}$  (4.1 mL, 29.2 mmol, 5 equiv), and  $\text{CH}_2\text{Cl}_2$  (19.5 mL, 0.30 M). The crude material was purified by column chromatography (3% EtOAc in hexanes) to afford **5j** as a light yellow oil (777 mg, 74% yield).  **$^1\text{H}$  NMR** (400 MHz,  $\text{CDCl}_3$ )  $\delta$  9.61 (d,  $J = 2.5$  Hz, 1H), 7.36 (dd,  $J = 4.9$ , 3.0 Hz, 1H), 7.14 (d,  $J = 2.2$  Hz, 1H), 6.99 (d,  $J = 4.9$  Hz, 1H), 4.79 (s, 1H), 4.71 (s, 1H), 3.89 (td,  $J = 7.4$ , 2.2 Hz, 1H), 2.82 (dd,  $J = 14.6$ , 7.6 Hz, 1H), 2.48 (dd,  $J = 14.7$ , 7.2 Hz, 1H), 1.73 (s, 3H).  **$^{13}\text{C}$  NMR** (101 MHz,  $\text{CDCl}_3$ )  $\delta$  199.7, 142.0, 136.3, 127.4, 126.6, 122.9, 113.0, 52.5, 37.7, 22.7. **IR** (ATR): 2936, 2818, 2718, 1723, 1650, 1376, 1076, 892, 777, 642  $\text{cm}^{-1}$ . **HRMS** calculated for  $\text{C}_{10}\text{H}_{12}\text{SONH}_4$   $[\text{M}+\text{NH}_4]^+$  198.0953, found 198.0947.

## General Procedure for Oxidation of Alcohols with IBX

To a round bottom flask was added alcohol **S4** (1 equiv) and DMSO (0.25 M). IBX<sup>[7]</sup> (1.1 equiv) was added, and the resulting mixture was stirred at rt for 2 h. The reaction mixture was quenched with H<sub>2</sub>O and filtered. The filtrate was extracted with CH<sub>2</sub>Cl<sub>2</sub> (3 x 15 mL). The combined organic layers were washed with brine, dried with anhydrous MgSO<sub>4</sub>, and concentrated *in vacuo*. The residue was purified by column chromatography to afford aldehyde **5**.

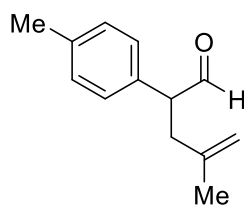

**4-methyl-2-(p-tolyl)pent-4-enal (5b)**: The title compound was prepared following the general oxidation procedure with IBX using **S4b** (380 mg, 2.0 mmol, 1 equiv), IBX (616 mg, 2.2 mmol, 1.1 equiv), and DMSO (8 mL, 0.25 M). The crude material was purified by column chromatography (3% EtOAc in hexanes) to afford **5b** as a colorless oil (311 mg, 83% yield). <sup>1</sup>H NMR (400 MHz, CDCl<sub>3</sub>) δ 9.66 (d, *J* = 2.2 Hz, 1H), 7.19 (d, *J* = 7.8 Hz, 2H), 7.11 (d, *J* = 8.1 Hz, 2H), 4.76 (d, *J* = 1.7 Hz, 1H), 4.67 (d, *J* = 0.5 Hz, 1H), 3.72 (td, *J* = 7.5, 2.2 Hz, 1H), 2.84 (dd, *J* = 14.8, 7.1 Hz, 1H), 2.44 (dd, *J* = 14.8, 7.9 Hz, 1H), 2.35 (s, 3H), 1.71 (s, 3H). <sup>13</sup>C NMR (101 MHz, CDCl<sub>3</sub>) δ 200.5, 142.3, 137.5, 133.0, 129.9, 128.8, 112.9, 56.9, 37.7, 22.8, 21.2. IR (ATR): 2921, 2716, 1721, 1650, 1513, 1445, 1376, 1021, 890, 810 cm<sup>-1</sup>. HRMS calculated for C<sub>13</sub>H<sub>16</sub>O [M]<sup>+</sup> 188.1201, found 188.1208.

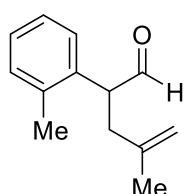

**4-methyl-2-(o-tolyl)pent-4-enal (5c)**: The title compound was prepared following the general oxidation procedure with IBX using **S4c** (380 mg, 2.0 mmol, 1 equiv), IBX (616 mg, 2.2 mmol, 1.1 equiv), and DMSO (8 mL, 0.25 M). The crude material was purified by column chromatography (3% EtOAc in hexanes) to afford **5c** as a colorless oil (346 mg, 92% yield). <sup>1</sup>H NMR (400 MHz, CDCl<sub>3</sub>) δ 9.63 (d, *J* = 2.1 Hz, 1H), 7.26 – 7.19 (m, 3H), 7.14 – 7.10 (m, 1H), 4.80 – 4.73 (m, 1H), 4.69 (dd, *J* = 1.7, 0.8 Hz, 1H), 4.01 (td, *J* = 7.3, 2.1 Hz, 1H), 2.89 (dd, *J* = 14.7, 7.5 Hz, 1H), 2.47 – 2.34 (m, 4H), 1.73 (s, 3H). <sup>13</sup>C NMR (101 MHz, CDCl<sub>3</sub>) δ 200.2, 142.4, 137.2, 134.7, 131.1, 128.0, 127.6, 126.7, 112.8, 53.4, 37.5, 22.9, 20.0. IR (ATR): 2935, 2717, 1720, 1650, 1490, 1445, 1377, 891, 755, 724 cm<sup>-1</sup>. HRMS calculated for C<sub>13</sub>H<sub>16</sub>O<sub>Na</sub> [M+Na]<sup>+</sup> 211.1099, found 211.1106.

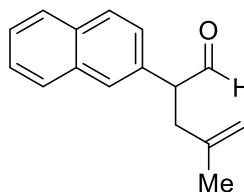

**4-methyl-2-(naphthalen-2-yl)pent-4-enal (5d)**: The title compound was prepared following the general oxidation procedure with IBX using **S4d** (453 mg, 2.0 mmol, 1 equiv), IBX (616 mg, 2.2 mmol, 1.1 equiv), and DMSO (8 mL, 0.25 M). The crude material was purified by column chromatography (3% EtOAc in hexanes) to afford **5d** as a colorless oil (212.6 mg, 47% yield). <sup>1</sup>H NMR (400 MHz, CDCl<sub>3</sub>) δ 9.76 (d, *J* = 2.1 Hz, 1H), 7.89 – 7.80 (m, 3H), 7.70 (s, 1H), 7.54 – 7.46 (m, 2H), 7.34 (dd, *J* = 8.4, 1.8 Hz, 1H), 4.77 (s, 1H), 4.71 (s, 1H), 3.94 (td, *J* = 7.6, 2.1 Hz, 1H), 2.96 (dd, *J* = 15.0, 6.9 Hz, 1H), 2.58 (dd, *J* = 14.9, 7.9 Hz, 1H), 1.75 (s, 3H). <sup>13</sup>C NMR (101 MHz, CDCl<sub>3</sub>) δ 200.3, 142.1, 133.7, 133.5, 132.9, 129.0, 128.0, 127.89, 127.86, 126.6, 126.3, 113.1, 57.5, 37.8, 22.8. IR (ATR): 2935, 2716, 1720, 1650, 1507, 1441, 891, 857, 816, 746 cm<sup>-1</sup>. HRMS calculated for C<sub>16</sub>H<sub>16</sub>O<sub>Na</sub> [M+Na]<sup>+</sup> 247.1099, found 247.1096.

Preparation of Aldehyde **3a**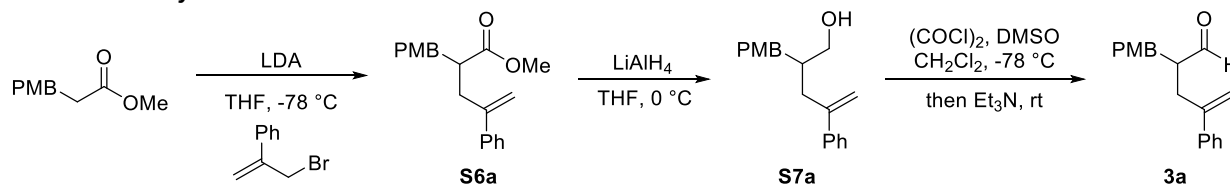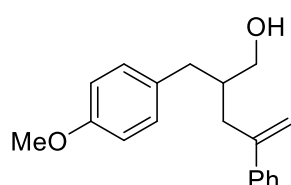

**2-(4-methoxybenzyl)-4-phenylpent-4-en-1-ol (S7a)**: To an oven-dried round bottom flask was added <sup>t</sup>Pr<sub>2</sub>NH (2.1 mL, 15 mmol, 1.3 equiv) and THF (25 mL), and the resulting solution was cooled to -78 °C. Then, <sup>n</sup>BuLi (5.8 mL, 14.4 mmol, 1.2 equiv, 2.5 M in THF) was added dropwise, and the resulting mixture was stirred for 1 hr. A solution of methyl 3-(4-methoxyphenyl)propanoate (2.33 g, 12 mmol, 1.0 equiv) in THF (10 mL) was added dropwise, and the resulting mixture was stirred for 1 h. Next, (3-bromoprop-1-en-2-yl)benzene<sup>[8]</sup> (3.55 g, 18 mmol, 1.5 equiv) was added, and the reaction mixture was stirred for 3 h. The reaction was quenched with saturated aqueous NH<sub>4</sub>Cl and extracted with EtOAc (3 x 20 mL). The combined organic layers were washed with brine, dried with anhydrous MgSO<sub>4</sub>, and concentrated *in vacuo*. The ester **S6a** was used without further purification. Crude **S6a** was dissolved in THF (24 mL, 0.50 M), and the solution was cooled to 0 °C. LiAlH<sub>4</sub> (683 mg, 18 mmol, 1.5 equiv) was

added portionwise, and the resulting mixture was stirred at 0 °C for 30 min. The reaction was quenched using the Fieser method, filtered through celite, and concentrated *in vacuo*. The crude material was purified by column chromatography (10% EtOAc in hexanes) to afford **S7a** as a colorless oil (1.74 g, 52% yield). <sup>1</sup>H NMR (400 MHz, CDCl<sub>3</sub>) δ 7.35 – 7.25 (m, 5H), 7.06 – 7.00 (m, 2H), 6.85 – 6.79 (m, 2H), 5.34 (d, *J* = 1.6 Hz, 1H), 5.13 (d, *J* = 1.4 Hz, 1H), 3.80 (s, 3H), 3.57 – 3.45 (m, 2H), 2.66 – 2.51 (m, 4H), 1.93 – 1.81 (m, 1H), 1.27 (s, 1H). <sup>13</sup>C NMR (101 MHz, CDCl<sub>3</sub>) δ 158.0, 147.4, 140.9, 132.6, 130.2, 128.5, 127.6, 126.4, 114.4, 113.9, 64.7, 55.4, 41.1, 37.2, 36.7. IR (ATR): 3360, 2930, 1611, 1511, 1442, 1300, 1244, 1177, 1027, 897, 779 cm<sup>-1</sup>. HRMS calculated for C<sub>19</sub>H<sub>22</sub>O<sub>2</sub>Na [M+Na]<sup>+</sup> 305.1518, found 305.1505.

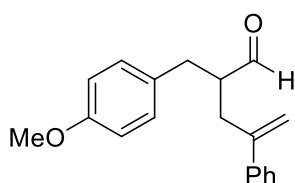

**2-(4-methoxybenzyl)-4-phenylpent-4-enal (3a):** To an oven-dried round bottom flask was added oxalyl chloride (1.1 mL, 12.4 mmol, 2 equiv) and CH<sub>2</sub>Cl<sub>2</sub> (14 mL). The mixture was cooled to -78 °C, and DMSO (1.3 mL, 18.6 mmol, 3 equiv) was added. The resulting mixture was stirred for 10 min. Alcohol **S7a** (1.7 g, 6.2 mmol, 1.0 equiv) was added dropwise as a solution in CH<sub>2</sub>Cl<sub>2</sub> (14 mL), and the resulting mixture was stirred for 15 min. Et<sub>3</sub>N (5.2 mL, 37.2 mmol, 6 equiv) was added, and the

resulting mixture was allowed to warm to rt and stirred for 10 min. The reaction mixture was quenched with H<sub>2</sub>O and extracted with CH<sub>2</sub>Cl<sub>2</sub> (3 x 15 mL). The combined organic layers were washed with brine, dried with anhydrous MgSO<sub>4</sub>, and concentrated *in vacuo*. The crude material was purified by column chromatography (50% CH<sub>2</sub>Cl<sub>2</sub> in hexanes) to afford **3a** as a light yellow oil (1.27 g, 73% yield). <sup>1</sup>H NMR (400 MHz, CDCl<sub>3</sub>) δ 9.67 (d, *J* = 2.0 Hz, 1H), 7.36 – 7.28 (m, 5H), 7.05 – 6.97 (m, 2H), 6.84 – 6.79 (m, 2H), 5.36 (d, *J* = 1.2 Hz, 1H), 5.13 (d, *J* = 1.2 Hz, 1H), 3.79 (s, 3H), 2.90 (ddd, *J* = 9.2, 3.6, 1.6 Hz, 2H), 2.78 – 2.68 (m, 2H), 2.66 – 2.58 (m, 1H). <sup>13</sup>C NMR (101 MHz, CDCl<sub>3</sub>) δ 204.3, 158.4, 145.6, 140.4, 130.6, 130.2, 128.6, 127.9, 126.4, 115.2, 114.1, 55.4, 51.7, 34.8, 34.2. IR (ATR): 2933, 2835, 1723, 1611, 1511, 1245, 1178, 1034, 901, 779, 704 cm<sup>-1</sup>. HRMS calculated for C<sub>19</sub>H<sub>20</sub>O<sub>2</sub>Na [M+Na]<sup>+</sup> 303.1361, found 303.1367.

#### Preparation of Aldehydes 3b-h

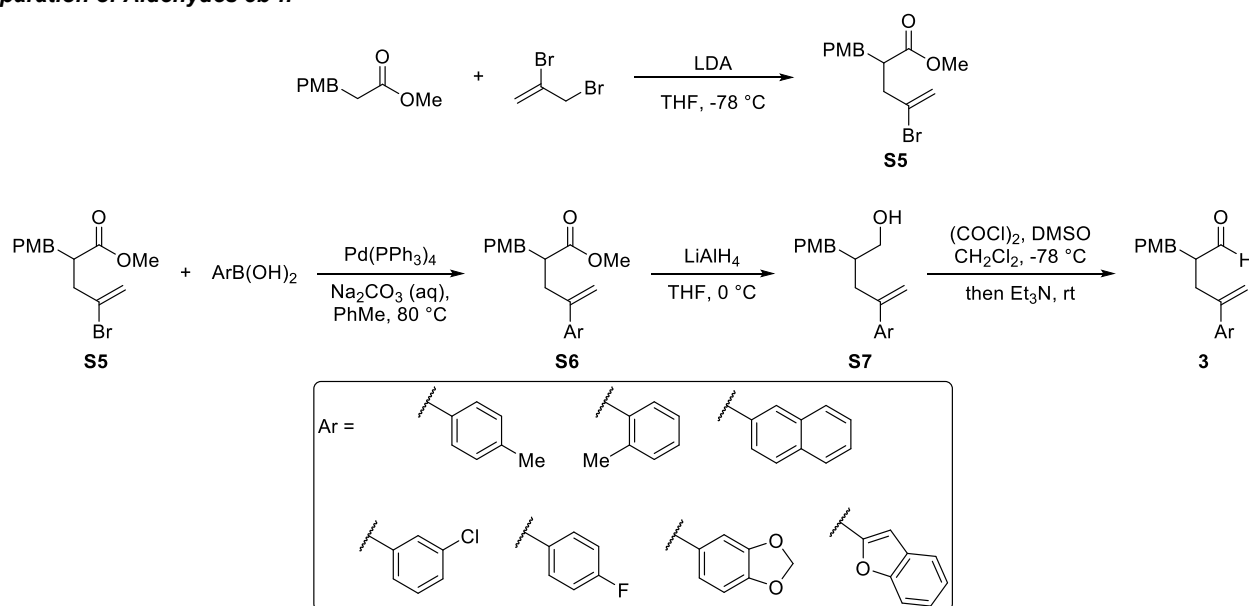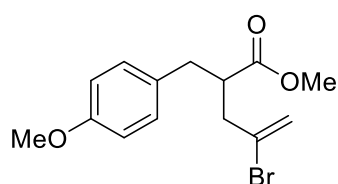

**methyl 4-bromo-2-(4-methoxybenzyl)pent-4-enoate (S5):** To an oven-dried round bottom flask was added <sup>i</sup>Pr<sub>2</sub>NH (3.4 mL, 24 mmol, 1.2 equiv) and THF (60 mL, 0.33 M), and the resulting solution was cooled to -78 °C. Then, <sup>n</sup>BuLi (8.8 mL, 22 mmol, 1.1 equiv, 2.5 M in THF) was added dropwise, and the resulting mixture was stirred for 45 min. A solution of methyl 3-(4-methoxyphenyl)propanoate (3.88 g, 20 mmol, 1 equiv) in THF (10 mL) was added dropwise, and the resulting mixture was allowed to stir for 1 h. Next, 2,3-dibromoprop-1-ene (5.33 g, 1.2 equiv, 90 wt%) was added, and the reaction mixture was stirred for 2 h. The reaction was quenched with saturated aqueous NH<sub>4</sub>Cl and extracted with EtOAc (3 x 20 mL). The combined organic layers were washed with brine, dried with anhydrous MgSO<sub>4</sub>, and

concentrated *in vacuo*. The crude material was purified by column chromatography (10% EtOAc in hexanes) to afford **S5** as a colorless oil (1.74 g, 52% yield).



concentrated *in vacuo*. The residue was purified by column chromatography (3% EtOAc in hexanes) to afford **S5** as a colorless oil (4.74 g, 75% yield).  $^1\text{H NMR}$  (400 MHz,  $\text{CDCl}_3$ )  $\delta$  7.08 (d,  $J$  = 8.5 Hz, 2H), 6.83 (d,  $J$  = 8.6 Hz, 2H), 5.64 (s, 1H), 5.47 (d,  $J$  = 1.5 Hz, 1H), 3.79 (s, 3H), 3.61 (s, 3H), 3.12 – 3.01 (m, 1H), 2.92 – 2.73 (m, 3H), 2.55 (dd,  $J$  = 14.6, 6.0 Hz, 1H).  $^{13}\text{C NMR}$  (101 MHz,  $\text{CDCl}_3$ )  $\delta$  174.8, 158.5, 131.2, 130.5, 130.0, 119.1, 114.0, 55.4, 51.8, 46.4, 43.4, 36.8. **IR** (ATR): 2951, 1733, 1628, 1612, 1512, 1435, 1246, 1176, 1034, 893  $\text{cm}^{-1}$ . **HRMS** calculated for  $\text{C}_{14}\text{H}_{17}\text{BrO}_3\text{Na}$   $[\text{M}+\text{Na}]^+$  335.0259, found 335.0275.

#### General Procedure for Suzuki Cross-coupling

To a round bottom flask was charged  $\text{Pd}(\text{PPh}_3)_4$  (1 mol%), the appropriate arylboronic acid (1.2 equiv), **S5** (1 equiv),  $\text{Na}_2\text{CO}_3$  (3.0 equiv, 2 M in  $\text{H}_2\text{O}$ ), and PhMe (0.20 M). The resulting mixture was stirred at 80 °C overnight. The reaction was cooled to rt and quenched with saturated aqueous  $\text{NH}_4\text{Cl}$  and extracted with EtOAc (3 x 10 mL). The combined organic layers were washed with brine, dried with anhydrous  $\text{MgSO}_4$ , and concentrated *in vacuo*. The ester **S6** was used without further purification.

#### General Procedure for Ester Reduction

The crude ester **S6** was dissolved in THF (0.50 M), and the resulting solution was cooled to 0 °C.  $\text{LiAlH}_4$  (1.5 equiv) was added portionwise, and the resulting mixture was stirred for 30 min. The reaction was quenched using the Fieser method, filtered through celite, and concentrated *in vacuo*. The residue was purified by column chromatography to afford alcohol **S7**.

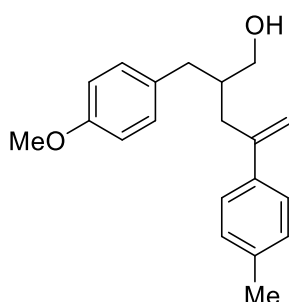

**2-(4-methoxybenzyl)-4-(p-tolyl)pent-4-en-1-ol (S7b)**: The title compound was prepared following the general procedures for Suzuki cross-coupling and ester reduction using **S5** (940 mg, 3.0 mmol, 1 equiv), *p*-tolylboronic acid (490 mg, 3.6 mmol, 1.2 equiv),  $\text{Pd}(\text{PPh}_3)_4$  (34.7 mg, 0.030 mmol, 1 mol%),  $\text{Na}_2\text{CO}_3$  (4.5 mL, 9.0 mmol, 3.0 equiv, 2 M in  $\text{H}_2\text{O}$ ), and PhMe (15 mL, 0.20 M). Crude **S6b** (1 equiv) was reduced to **S7b** using  $\text{LiAlH}_4$  (171 mg, 4.5 mmol, 1.5 equiv) and THF (6.0 mL, 0.50 M). The crude material was purified by column chromatography (10% EtOAc in hexanes) to afford **S7b** as a colorless oil (787 mg, 89% yield).  $^1\text{H NMR}$  (400 MHz,  $\text{CDCl}_3$ )  $\delta$  7.23 (d,  $J$  = 8.1 Hz, 2H), 7.13 (d,  $J$  = 8.0 Hz, 2H), 7.04 (d,  $J$  = 8.5 Hz, 2H), 6.83 (d,  $J$  = 8.5 Hz, 2H), 5.32 (s, 1H), 5.09 (s, 1H), 3.81 (s, 3H), 3.51 (s, 2H), 2.61 (dd,  $J$  = 7.2, 2.9 Hz, 2H), 2.56 (d,  $J$  = 7.1 Hz, 2H), 2.36 (s, 3H), 1.95 – 1.81 (m, 1H), 1.28 (s, 1H).  $^{13}\text{C NMR}$  (101 MHz,  $\text{CDCl}_3$ )  $\delta$  158.0, 147.2, 137.9, 137.4, 132.6, 130.2, 129.2, 126.3, 113.9, 113.6, 64.7, 55.4, 41.1, 37.3, 36.8, 21.2. **IR** (ATR): 3369, 2920, 1611, 1510, 1442, 1244, 1177, 1031, 894, 825  $\text{cm}^{-1}$ . **HRMS** calculated for  $\text{C}_{20}\text{H}_{24}\text{O}_2\text{H}$   $[\text{M}+\text{H}]^+$  297.1855, found 297.1856.

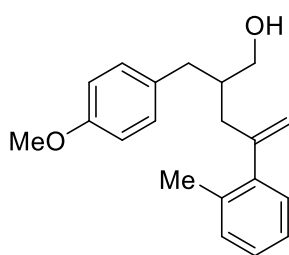

**2-(4-methoxybenzyl)-4-(o-tolyl)pent-4-en-1-ol (S7c)**: The title compound was prepared following the general procedures for Suzuki cross-coupling and ester reduction using **S5** (940 mg, 3.0 mmol, 1 equiv), *o*-tolylboronic acid (490 mg, 3.6 mmol, 1.2 equiv),  $\text{Pd}(\text{PPh}_3)_4$  (34.7 mg, 0.030 mmol, 1 mol%),  $\text{Na}_2\text{CO}_3$  (4.5 mL, 9.0 mmol, 3.0 equiv, 2 M in  $\text{H}_2\text{O}$ ), and PhMe (15 mL, 0.20 M). Crude **S6c** (1 equiv) was reduced to **S7c** using  $\text{LiAlH}_4$  (171 mg, 4.5 mmol, 1.5 equiv) and THF (6.0 mL, 0.50 M). The crude material was purified by column chromatography (10% EtOAc in hexanes) to afford **S7c** as a colorless oil (821 mg, 92% yield).  $^1\text{H NMR}$  (400 MHz,  $\text{CDCl}_3$ )  $\delta$  7.22 – 7.13 (m, 3H), 7.11 (d,  $J$  = 6.7 Hz, 1H), 7.00 (d,  $J$  = 8.5 Hz, 2H), 6.80 (d,  $J$  = 8.5 Hz, 2H), 5.27 (d,  $J$  = 1.0 Hz, 1H), 5.01 (d,  $J$  = 2.0 Hz, 1H), 3.79 (s, 3H), 3.57 – 3.45 (m, 2H), 2.66 (dd,  $J$  = 13.8, 6.2 Hz, 1H), 2.59 – 2.48 (m, 2H), 2.40 (dd,  $J$  = 14.4, 6.6 Hz, 1H), 2.29 (s, 3H), 1.84 – 1.73 (m, 1H), 1.22 (s, 1H).  $^{13}\text{C NMR}$  (101 MHz,  $\text{CDCl}_3$ )  $\delta$  158.0, 148.6, 142.4, 135.0, 132.5, 130.5, 130.1, 128.6, 127.1, 125.7, 116.2, 113.9, 64.7, 55.4, 40.8, 39.2, 36.5, 20.1. **IR** (ATR): 3367, 2926, 1611, 1511, 1441, 1243, 1177, 1032, 903, 732  $\text{cm}^{-1}$ . **HRMS** calculated for  $\text{C}_{20}\text{H}_{24}\text{O}_2\text{Na}$   $[\text{M}+\text{Na}]^+$  319.1674, found 319.1664.

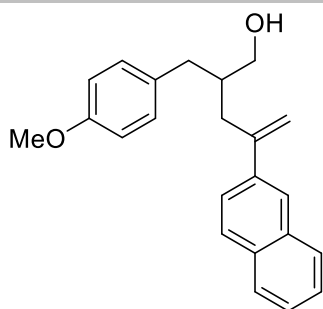

**2-(4-methoxybenzyl)-4-(naphthalen-2-yl)pent-4-en-1-ol (S7d):** The title compound was prepared following the general procedures for Suzuki cross-coupling and ester reduction using **S5** (940 mg, 3.0 mmol, 1 equiv), 2-naphthylboronic acid (619 mg, 3.6 mmol, 1.2 equiv), Pd(PPh<sub>3</sub>)<sub>4</sub> (34.7 mg, 0.030 mmol, 1 mol%), Na<sub>2</sub>CO<sub>3</sub> (4.5 mL, 9.0 mmol, 3.0 equiv, 2 M in H<sub>2</sub>O), and PhMe (15 mL, 0.20 M). Crude **S6d** (1 equiv) was reduced to **S7d** using LiAlH<sub>4</sub> (171 mg, 4.5 mmol, 1.5 equiv) and THF (6.0 mL, 0.50 M). The crude material was purified by column chromatography (10% EtOAc in hexanes) to afford **S7d** as a white solid (851 mg, 85% yield). **<sup>1</sup>H NMR** (400 MHz, CDCl<sub>3</sub>) δ 7.85 – 7.73 (m, 3H), 7.66 (s, 1H), 7.54 – 7.49 (m, 1H), 7.49 – 7.43 (m, 2H), 7.08 – 7.02 (m, 2H), 6.87 – 6.80 (m, 2H), 5.50 (d, *J* = 1.5 Hz, 1H), 5.24 (d, *J* = 1.2 Hz, 1H), 3.82 (s, 3H), 3.56 (d, *J* = 4.6 Hz, 2H), 2.75 – 2.56 (m, 4H), 1.93 (tt, *J* = 7.6, 4.2 Hz, 1H), 1.34 (s, 1H). **<sup>13</sup>C NMR** (101 MHz, CDCl<sub>3</sub>) δ 158.1, 147.1, 137.9, 133.5, 133.0, 132.6, 130.3, 128.3, 128.0, 127.6, 126.2, 126.0, 125.1, 124.8, 114.9, 113.9, 64.8, 55.4, 41.3, 37.0, 36.9. **IR** (ATR): 3306, 2931, 1610, 1509, 1243, 1023, 886, 828, 809, 751 cm<sup>-1</sup>. **HRMS** calculated for C<sub>23</sub>H<sub>24</sub>O<sub>2</sub>Na [M+Na]<sup>+</sup> 355.1674, found 355.1680.

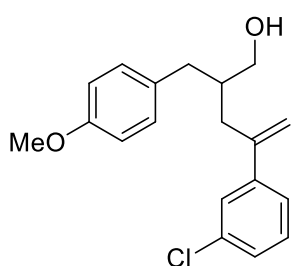

**4-(3-chlorophenyl)-2-(4-methoxybenzyl)pent-4-en-1-ol (S7e):** The title compound was prepared following the general procedures for Suzuki cross-coupling and ester reduction using **S5** (940 mg, 3.0 mmol, 1 equiv), 3-chlorophenylboronic acid (563 mg, 3.6 mmol, 1.2 equiv), Pd(PPh<sub>3</sub>)<sub>4</sub> (34.7 mg, 0.030 mmol, 1 mol%), Na<sub>2</sub>CO<sub>3</sub> (4.5 mL, 9.0 mmol, 3.0 equiv, 2 M in H<sub>2</sub>O), and PhMe (15 mL, 0.20 M). Crude **S6e** (1 equiv) was reduced to **S7e** using LiAlH<sub>4</sub> (171 mg, 4.5 mmol, 1.5 equiv) and THF (6.0 mL, 0.50 M). The crude material was purified by column chromatography (10% EtOAc in hexanes) to afford **S7e** as a colorless oil (732 mg, 77% yield). **<sup>1</sup>H NMR** (400 MHz, CDCl<sub>3</sub>) δ 7.29 – 7.20 (m, 3H), 7.17 (dd, *J* = 4.5, 1.9 Hz, 1H), 7.03 (d, *J* = 8.4 Hz, 2H), 6.83 (d, *J* = 8.4 Hz, 2H), 5.34 (s, 1H), 5.16 (s, 1H), 3.80 (s, 3H), 3.56 – 3.47 (m, 2H), 2.64 (dd, *J* = 13.8, 7.4 Hz, 1H), 2.60 – 2.45 (m, 3H), 1.90 – 1.78 (m, 1H), 1.27 (s, 1H). **<sup>13</sup>C NMR** (101 MHz, CDCl<sub>3</sub>) δ 158.1, 146.2, 142.8, 134.5, 132.4, 130.2, 129.7, 127.7, 126.6, 124.6, 115.4, 114.0, 64.6, 55.4, 41.0, 36.9, 36.7. **IR** (ATR): 3359, 2929, 1511, 1441, 1299, 1244, 1177, 1031, 804, 789 cm<sup>-1</sup>. **HRMS** calculated for C<sub>19</sub>H<sub>21</sub>ClO<sub>2</sub>Na [M+Na]<sup>+</sup> 339.1128, found 339.1129.

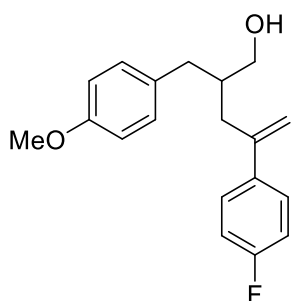

**4-(4-fluorophenyl)-2-(4-methoxybenzyl)pent-4-en-1-ol (S7f):** The title compound was prepared following the general procedures for Suzuki cross-coupling and ester reduction using **S5** (940 mg, 3.0 mmol, 1 equiv), 4-fluorophenylboronic acid (504 mg, 3.6 mmol, 1.2 equiv), Pd(PPh<sub>3</sub>)<sub>4</sub> (34.7 mg, 0.030 mmol, 1 mol%), Na<sub>2</sub>CO<sub>3</sub> (4.5 mL, 9.0 mmol, 3.0 equiv, 2 M in H<sub>2</sub>O), and PhMe (15 mL, 0.20 M). Crude **S6f** (1 equiv) was reduced to **S7f** using LiAlH<sub>4</sub> (171 mg, 4.5 mmol, 1.5 equiv) and THF (6.0 mL, 0.50 M). The crude material was purified by column chromatography (10% EtOAc in hexanes) to afford **S7f** as a colorless oil (808 mg, 90% yield). **<sup>1</sup>H NMR** (400 MHz, CDCl<sub>3</sub>) δ 7.32 – 7.21 (m, 2H), 7.00 (dd, *J* = 16.8, 8.5 Hz, 4H), 6.83 (d, *J* = 8.5 Hz, 2H), 5.28 (s, 1H), 5.11 (s, 1H), 3.80 (s, 3H), 3.56 – 3.42 (m, 2H), 2.67 – 2.45 (m, 4H), 1.89 – 1.75 (m, 1H), 1.35 (s, 1H). **<sup>13</sup>C NMR** (101 MHz, CDCl<sub>3</sub>) δ 162.4 (d, *J* = 246.3 Hz), 158.1, 146.3, 136.9 (d, *J* = 3.3 Hz), 132.5, 130.2, 128.0 (d, *J* = 7.9 Hz), 115.3 (d, *J* = 21.3 Hz), 114.3 (d, *J* = 1.2 Hz), 113.9, 64.6, 55.4, 41.1, 37.3, 36.7. **<sup>19</sup>F NMR** (376 MHz, CDCl<sub>3</sub>) δ -115.3. **IR** (ATR): 3344, 2929, 1601, 1508, 1244, 1177, 1030, 898, 839, 806 cm<sup>-1</sup>. **HRMS** calculated for C<sub>19</sub>H<sub>21</sub>FO<sub>2</sub>Na [M+Na]<sup>+</sup> 323.1423, found 323.1409.

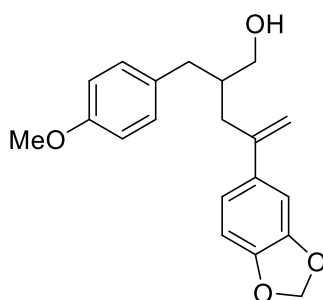

**4-(benzo[d][1,3]dioxol-5-yl)-2-(4-methoxybenzyl)pent-4-en-1-ol (S7g):** The title compound was prepared following the general procedures for Suzuki cross-coupling and ester reduction using **S5** (940 mg, 3.0 mmol, 1 equiv), 3,4-(methylenedioxy)phenylboronic acid (597 mg, 3.6 mmol, 1.2 equiv), Pd(PPh<sub>3</sub>)<sub>4</sub> (34.7 mg, 0.030 mmol, 1 mol%), Na<sub>2</sub>CO<sub>3</sub> (4.5 mL, 9.0 mmol, 3.0 equiv, 2 M in H<sub>2</sub>O), and PhMe (15 mL, 0.20 M). Crude **S6g** (1 equiv) was reduced to **S7g** using LiAlH<sub>4</sub> (171 mg, 4.5 mmol, 1.5 equiv) and THF (6.0 mL, 0.50 M). The crude material was purified by column chromatography (10% EtOAc in hexanes) to afford **S7g** as a yellow oil (880 mg, 90% yield). **<sup>1</sup>H NMR** (400 MHz, CDCl<sub>3</sub>) δ 7.07 – 7.01 (m, 2H), 6.85 – 6.76 (m, 4H), 6.74 (dd, *J* = 8.1, 0.5 Hz, 1H), 5.96 (dd, *J* = 1.4, 0.5 Hz, 1H), 5.95 (dd, *J* = 1.4, 0.4 Hz, 1H), 5.24 (d, *J* = 1.6 Hz, 1H), 5.04 (d, *J* = 1.1 Hz, 1H), 3.80 (s, 3H), 3.56 – 3.43 (m, 2H), 2.65 – 2.55 (m, 2H), 2.55 – 2.42 (m, 2H), 1.93 – 1.80 (m, 1H), 1.42 (s, 1H). **<sup>13</sup>C NMR** (101 MHz, CDCl<sub>3</sub>) δ 158.0, 147.8,

147.1, 146.8, 135.1, 132.6, 130.2, 119.9, 113.9, 113.4, 108.2, 107.0, 101.1, 64.6, 55.4, 41.1, 37.4, 36.7. IR (ATR): 3375, 2915, 1610, 1511, 1488, 1440, 1231, 1177, 1034, 935, 807 cm<sup>-1</sup>. HRMS calculated for C<sub>20</sub>H<sub>22</sub>O<sub>4</sub>H [M+H]<sup>+</sup> 327.1596, found 327.1599.

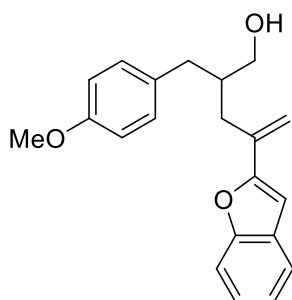

**4-(benzofuran-2-yl)-2-(4-methoxybenzyl)pent-4-en-1-ol (S7h):** The title compound was prepared following the general procedures for Suzuki cross-coupling and ester reduction using **S5** (940 mg, 3.0 mmol, 1 equiv), 2-benzofuranylboronic acid (583 mg, 3.6 mmol, 1.2 equiv), Pd(PPh<sub>3</sub>)<sub>4</sub> (34.7 mg, 0.030 mmol, 1 mol%), Na<sub>2</sub>CO<sub>3</sub> (4.5 mL, 9.0 mmol, 3.0 equiv, 2 M in H<sub>2</sub>O), and PhMe (15 mL, 0.20 M). Crude **S6h** (1 equiv) was reduced to **S7h** using LiAlH<sub>4</sub> (171 mg, 4.5 mmol, 1.5 equiv) and THF (6.0 mL, 0.50 M). The crude material was purified by column chromatography (10% EtOAc in hexanes) to afford **S7h** as a yellow oil (379 mg, 39% yield). <sup>1</sup>H NMR (400 MHz, CD<sub>2</sub>Cl<sub>2</sub>) δ 7.48 (d, *J* = 7.6 Hz, 1H), 7.41 (d, *J* = 8.2 Hz, 1H), 7.25 (t, *J* = 7.7 Hz, 1H), 7.17 (t, *J* = 7.5 Hz, 1H), 7.10 (d, *J* = 8.6 Hz, 2H), 6.83 (d, *J* = 8.5 Hz, 2H), 6.44 (s, 1H), 5.87 (s, 1H), 5.21 (s, 1H), 3.77 (s, 3H), 3.59 – 3.48 (m, 2H), 2.65 (qd, *J* = 13.6, 7.2 Hz, 2H), 2.53 (dd, *J* = 14.2, 8.1 Hz, 1H), 2.42 (dd, *J* = 14.2, 5.9 Hz, 1H), 2.09 – 1.99 (m, 1H), 1.47 (s, 1H). <sup>13</sup>C NMR (101 MHz, CD<sub>2</sub>Cl<sub>2</sub>) δ 158.2, 156.4, 154.8, 136.3, 132.6, 130.3, 129.1, 124.7, 122.8, 121.1, 114.3, 113.8, 110.9, 103.2, 64.2, 55.3, 42.5, 36.8, 34.8. IR (ATR): 3387, 2930, 1611, 1511, 1452, 1244, 1176, 1031, 804, 743 cm<sup>-1</sup>. HRMS calculated for C<sub>21</sub>H<sub>22</sub>O<sub>3</sub>Na [M+Na]<sup>+</sup> 345.1467, found 345.1482.

#### General Procedure for Swern Oxidation of Alcohols S7

To an oven-dried round bottom flask was added oxalyl chloride (1.3 equiv) and CH<sub>2</sub>Cl<sub>2</sub> (0.50 M). The mixture was cooled to -78 °C, and DMSO (3 equiv) was added. The resulting mixture was stirred for 30 min. Alcohol **S7** (1 equiv) was added as a solution in CH<sub>2</sub>Cl<sub>2</sub> (0.50 M), and the resulting mixture was stirred for 30 min. Et<sub>3</sub>N (5 equiv) was added, and the resulting mixture was allowed to warm to rt and stirred for 30 min. The reaction mixture was quenched with H<sub>2</sub>O and extracted with CH<sub>2</sub>Cl<sub>2</sub> (3 x 15 mL). The combined organic layers were washed with brine, dried with anhydrous MgSO<sub>4</sub>, and concentrated *in vacuo*. The residue was purified by column chromatography to afford aldehyde **3**.

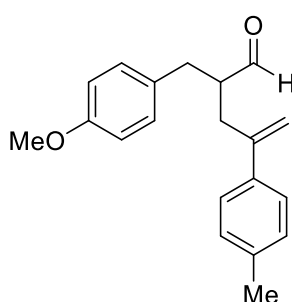

**2-(4-methoxybenzyl)-4-(p-tolyl)pent-4-enal (3b):** The title compound was prepared following the general procedure for Swern oxidation using **S7b** (754 mg, 2.5 mmol, 1 equiv), oxalyl chloride (0.28 mL, 3.3 mmol, 1.3 equiv), DMSO (0.54 mL, 7.6 mmol, 3 equiv), Et<sub>3</sub>N (1.8 mL, 12.7 mmol, 5 equiv), and CH<sub>2</sub>Cl<sub>2</sub> (10.2 mL, 0.25 M). The crude material was purified by column chromatography (3% EtOAc in hexanes) to afford **3b** as a light yellow oil (611 mg, 82% yield). <sup>1</sup>H NMR (400 MHz, CDCl<sub>3</sub>) δ 9.67 (d, *J* = 1.6 Hz, 1H), 7.20 (d, *J* = 8.1 Hz, 2H), 7.13 (d, *J* = 8.0 Hz, 2H), 7.02 (d, *J* = 8.5 Hz, 2H), 6.82 (d, *J* = 8.5 Hz, 2H), 5.33 (s, 1H), 5.08 (s, 1H), 3.79 (s, 3H), 2.93 – 2.82 (m, 2H), 2.77 – 2.67 (m, 2H), 2.60 (dd, *J* = 14.4, 5.7 Hz, 1H), 2.36 (s, 3H). <sup>13</sup>C NMR (101 MHz, CDCl<sub>3</sub>) δ 204.4, 158.4, 145.4, 137.7, 137.4, 130.7, 130.2, 129.3, 126.3, 114.4, 114.1, 55.4, 51.7, 34.8, 34.2, 21.2. IR (ATR): 2919, 2834, 1723, 1611, 1511, 1442, 1245, 1177, 1034, 825 cm<sup>-1</sup>. HRMS calculated for C<sub>20</sub>H<sub>22</sub>O<sub>2</sub>NH<sub>4</sub> [M+NH<sub>4</sub>]<sup>+</sup> 312.1964, found 312.1973.

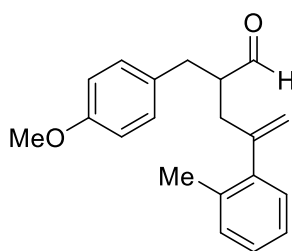

**2-(4-methoxybenzyl)-4-(o-tolyl)pent-4-enal (3c):** The title compound was prepared following the general procedure for Swern oxidation using **S7c** (763 mg, 2.6 mmol, 1 equiv), oxalyl chloride (0.29 mL, 3.3 mmol, 1.3 equiv), DMSO (0.55 mL, 7.7 mmol, 3 equiv), Et<sub>3</sub>N (1.8 mL, 12.9 mmol, 5 equiv), and CH<sub>2</sub>Cl<sub>2</sub> (10.3 mL, 0.25 M). The crude material was purified by column chromatography (3% EtOAc in hexanes) to afford **3c** as a colorless oil (713 mg, 94% yield). <sup>1</sup>H NMR (400 MHz, CDCl<sub>3</sub>) δ 9.63 (d, *J* = 2.3 Hz, 1H), 7.21 – 7.12 (m, 3H), 7.06 (d, *J* = 7.2 Hz, 1H), 7.03 – 6.96 (m, 2H), 6.83 – 6.76 (m, 2H), 5.26 (d, *J* = 1.5 Hz, 1H), 5.01 (d, *J* = 1.6 Hz, 1H), 3.79 (s, 3H), 2.88 (dd, *J* = 14.1, 7.7 Hz, 1H), 2.81 – 2.71 (m, 2H), 2.70 – 2.60 (m, 1H), 2.49 (dd, *J* = 14.7, 5.9 Hz, 1H), 2.26 (s, 3H). <sup>13</sup>C NMR (101 MHz, CDCl<sub>3</sub>) δ 204.3, 158.4, 146.9, 141.6, 135.1, 130.54, 130.48, 130.1, 128.7, 127.4, 125.8, 116.8, 114.1, 55.4, 51.5, 36.8, 34.4, 20.0. IR (ATR): 2931, 2835, 1724, 1611, 1512, 1245, 1178, 1034, 769, 732 cm<sup>-1</sup>. HRMS calculated for C<sub>20</sub>H<sub>22</sub>O<sub>2</sub>Na [M+Na]<sup>+</sup> 317.1518, found 317.1513.

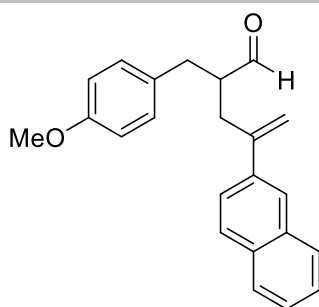

**2-(4-methoxybenzyl)-4-(naphthalen-2-yl)pent-4-enal (3d):** The title compound was prepared following the general procedure for Swern oxidation using **S7d** (807 mg, 2.4 mmol, 1 equiv), oxalyl chloride (0.27 mL, 3.2 mmol, 1.3 equiv), DMSO (0.52 mL, 7.3 mmol, 3 equiv), Et<sub>3</sub>N (1.7 mL, 12.1 mmol, 5 equiv), and CH<sub>2</sub>Cl<sub>2</sub> (9.7 mL, 0.25 M). The crude material was purified by column chromatography (3% EtOAc in hexanes) to afford **3d** as a white solid (685 mg, 85% yield). <sup>1</sup>H NMR (400 MHz, CDCl<sub>3</sub>) δ 9.72 (d, *J* = 1.5 Hz, 1H), 7.86 – 7.70 (m, 3H), 7.63 (s, 1H), 7.53 – 7.43 (m, 3H), 7.04 (d, *J* = 8.6 Hz, 2H), 6.83 (d, *J* = 8.6 Hz, 2H), 5.51 (s, 1H), 5.24 (s, 1H), 3.81 (s, 3H), 3.05 – 2.87 (m, 2H), 2.83 – 2.68 (m, 3H). <sup>13</sup>C NMR (101 MHz, CDCl<sub>3</sub>) δ 204.2, 158.4, 145.4, 137.4, 133.5, 133.1, 130.6, 130.2, 128.32, 128.27, 127.7, 126.4, 126.2, 125.1, 124.7, 115.7, 114.1, 55.4, 51.8, 34.6, 34.3. IR (ATR): 2929, 2834, 1717, 1611, 1511, 1245, 1177, 1031, 828, 816, 754 cm<sup>-1</sup>. HRMS calculated for C<sub>23</sub>H<sub>22</sub>O<sub>2</sub>Na [M+ Na]<sup>+</sup> 353.1518, found 353.1518.

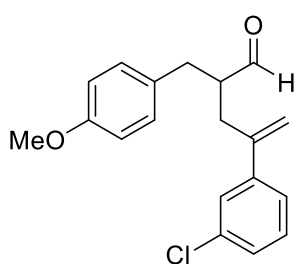

**4-(3-chlorophenyl)-2-(4-methoxybenzyl)pent-4-enal (3e):** The title compound was prepared following the general procedure for Swern oxidation using **S7e** (732 mg, 2.3 mmol, 1 equiv), oxalyl chloride (0.26 mL, 3.0 mmol, 1.3 equiv), DMSO (0.49 mL, 6.9 mmol, 3 equiv), Et<sub>3</sub>N (1.6 mL, 11.6 mmol, 5 equiv), and CH<sub>2</sub>Cl<sub>2</sub> (9.2 mL, 0.25 M). The crude material was purified by column chromatography (3% EtOAc in hexanes) to afford **3e** as a light yellow oil (710 mg, 98% yield). <sup>1</sup>H NMR (400 MHz, CDCl<sub>3</sub>) δ 9.68 (d, *J* = 1.9 Hz, 1H), 7.26 – 7.22 (m, 3H), 7.15 (dt, *J* = 6.4, 2.1 Hz, 1H), 7.04 – 6.99 (m, 2H), 6.85 – 6.81 (m, 2H), 5.36 (d, *J* = 0.5 Hz, 1H), 5.16 (d, *J* = 1.1 Hz, 1H), 3.80 (s, 3H), 2.96 – 2.82 (m, 2H), 2.74 – 2.65 (m, 2H), 2.61 – 2.54 (m, 1H). <sup>13</sup>C NMR (101 MHz, CDCl<sub>3</sub>) δ 203.9, 158.5, 144.5, 142.3, 134.6, 130.3, 130.2, 129.9, 128.0, 126.6, 124.6, 116.2, 114.2, 55.4, 51.6, 34.4, 34.2. IR (ATR): 2933, 2834, 1723, 1611, 1511, 1300, 1245, 1178, 1034, 790 cm<sup>-1</sup>. HRMS calculated for C<sub>19</sub>H<sub>19</sub>ClO<sub>2</sub>Na [M+ Na]<sup>+</sup> 337.0971, found 337.0987.

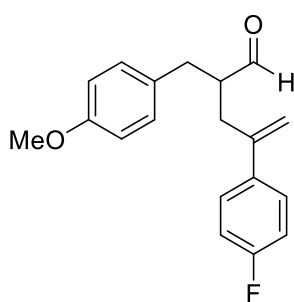

**4-(4-fluorophenyl)-2-(4-methoxybenzyl)pent-4-enal (3f):** The title compound was prepared following the general procedure for Swern oxidation using **S7f** (773 mg, 2.6 mmol, 1 equiv), oxalyl chloride (0.29 mL, 3.0 mmol, 1.3 equiv), DMSO (0.55 mL, 7.7 mmol, 3 equiv), Et<sub>3</sub>N (1.8 mL, 12.9 mmol, 5 equiv), and CH<sub>2</sub>Cl<sub>2</sub> (10.3 mL, 0.25 M). The crude material was purified by column chromatography (3% EtOAc in hexanes) to afford **3f** as a colorless oil (721 mg, 94% yield). <sup>1</sup>H NMR (400 MHz, CDCl<sub>3</sub>) δ 9.67 (d, *J* = 2.0 Hz, 1H), 7.26 – 7.21 (m, 2H), 7.00 (dd, *J* = 8.5, 8.0 Hz, 4H), 6.82 (d, *J* = 8.3 Hz, 2H), 5.29 (s, 1H), 5.11 (s, 1H), 3.79 (s, 3H), 2.94 – 2.82 (m, 2H), 2.74 – 2.64 (m, 2H), 2.58 (dd, *J* = 14.5, 4.9 Hz, 1H). <sup>13</sup>C NMR (101 MHz, CDCl<sub>3</sub>) δ 204.1, 162.6 (d, *J* = 246.9 Hz), 158.5, 144.6, 136.4 (d, *J* = 3.3 Hz), 130.4, 130.2, 128.0 (d, *J* = 8.0 Hz), 115.5 (d, *J* = 21.4 Hz), 115.1 (d, *J* = 1.2 Hz), 114.1, 55.4, 51.7, 34.8, 34.2. <sup>19</sup>F NMR (376 MHz, CDCl<sub>3</sub>) δ -114.8. IR (ATR): 2934, 2835, 1723, 1611, 1508, 1245, 1178, 1161, 1034, 839 cm<sup>-1</sup>. HRMS calculated for C<sub>19</sub>H<sub>19</sub>FO<sub>2</sub>Na [M+ Na]<sup>+</sup> 321.1267, found 321.1264.

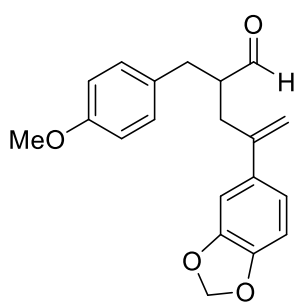

**4-(benzo[d][1,3]dioxol-5-yl)-2-(4-methoxybenzyl)pent-4-enal (3g):** The title compound was prepared following the general procedure for Swern oxidation using **S7g** (756 mg, 2.3 mmol, 1 equiv), oxalyl chloride (0.26 mL, 3.0 mmol, 1.3 equiv), DMSO (0.49 mL, 6.9 mmol, 3 equiv), Et<sub>3</sub>N (1.6 mL, 11.6 mmol, 5 equiv), and CH<sub>2</sub>Cl<sub>2</sub> (9.3 mL, 0.25 M). The crude material was purified by column chromatography (3% EtOAc in hexanes) to afford **3g** as a colorless oil (595 mg, 79% yield). <sup>1</sup>H NMR (400 MHz, CDCl<sub>3</sub>) δ 9.66 (d, *J* = 1.9 Hz, 1H), 7.02 (d, *J* = 8.6 Hz, 2H), 6.85 – 6.78 (m, 3H), 6.75 (d, *J* = 1.0 Hz, 2H), 5.98 – 5.93 (m, 2H), 5.25 (s, 1H), 5.04 (s, 1H), 3.79 (s, 3H), 2.86 (ddd, *J* = 21.6, 15.3, 8.3 Hz, 2H), 2.75 – 2.66 (m, 2H), 2.55 (dd, *J* = 14.3, 5.5 Hz, 1H). <sup>13</sup>C NMR (101 MHz, CDCl<sub>3</sub>) δ 204.2, 158.4, 148.0, 147.4, 145.1, 134.6, 130.6, 130.2, 119.9, 114.3, 114.1, 108.3, 107.0, 101.3, 55.4, 51.7, 35.0, 34.2. IR (ATR): 2906, 2835, 1722, 1611, 1512, 1440, 1231, 1178, 1035, 809 cm<sup>-1</sup>. HRMS calculated for C<sub>20</sub>H<sub>20</sub>O<sub>4</sub>Na [M+ Na]<sup>+</sup> 347.1259, found 347.1263.

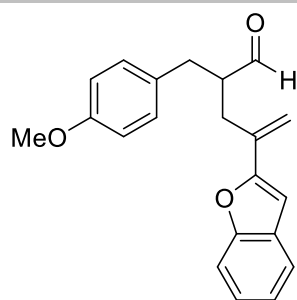

**4-(benzofuran-2-yl)-2-(4-methoxybenzyl)pent-4-enal (3h):** The title compound was prepared following the general procedure for Swern oxidation using **S7h** (379 mg, 1.2 mmol, 1 equiv), oxalyl chloride (0.13 mL, 1.5 mmol, 1.3 equiv), DMSO (0.25 mL, 3.5 mmol, 3 equiv), Et<sub>3</sub>N (0.82 mL, 5.9 mmol, 5 equiv), and CH<sub>2</sub>Cl<sub>2</sub> (4.8 mL, 0.25 M). The crude material was purified by column chromatography (3% EtOAc in hexanes) to afford **3h** as a yellow oil (297 mg, 79% yield). <sup>1</sup>H NMR (400 MHz, CD<sub>2</sub>Cl<sub>2</sub>) δ 9.70 (d, *J* = 1.9 Hz, 1H), 7.49 (d, *J* = 7.6 Hz, 1H), 7.41 (d, *J* = 8.0 Hz, 1H), 7.26 (t, *J* = 7.7 Hz, 1H), 7.18 (t, *J* = 7.5 Hz, 1H), 7.09 (d, *J* = 8.5 Hz, 2H), 6.83 (d, *J* = 8.6 Hz, 2H), 6.43 (s, 1H), 5.87 (s, 1H), 5.21 (s, 1H), 3.76 (s, 3H), 2.93 (ddd, *J* = 20.4, 14.0, 7.0 Hz, 2H), 2.79 (ddd, *J* = 19.5, 13.9, 7.0 Hz, 2H), 2.53 (dd, *J* = 14.3, 5.2 Hz, 1H). <sup>13</sup>C NMR (101 MHz, CD<sub>2</sub>Cl<sub>2</sub>) δ 203.6, 158.6, 155.7, 154.8, 134.9, 130.5, 130.2, 128.9, 124.9, 122.9, 121.2, 114.9, 114.1, 111.0, 103.1, 55.3, 52.6, 34.5, 32.0. IR (ATR): 2933, 2834, 1723, 1611, 1511, 1452, 1245, 1176, 1034, 806, 743 cm<sup>-1</sup>. HRMS calculated for C<sub>21</sub>H<sub>20</sub>O<sub>3</sub>Na [M+ Na]<sup>+</sup> 343.1310, found 343.1302.

### Preparation of Aldehyde 8

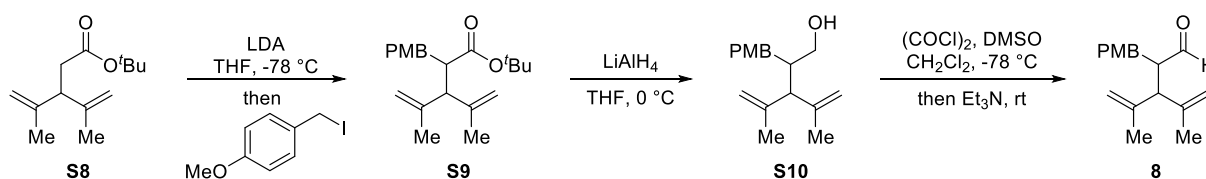

**2-(4-methoxybenzyl)-4-methyl-3-(prop-1-en-2-yl)pent-4-en-1-ol (S10):** To an oven-dried round bottom flask was added <sup>i</sup>Pr<sub>2</sub>NH (3.5 mL, 25 mmol, 1.3 equiv) and THF (47 mL, 0.33 M), and the resulting solution was cooled to -78 °C. Then, <sup>n</sup>BuLi (9.6 mL, 24 mmol, 1.2 equiv, 2.5 M in THF) was added dropwise, and the resulting mixture was stirred for 1 hr. A solution of ester **S8**<sup>[9]</sup> (4.21 g, 20 mmol, 1.0 equiv) in THF (10 mL) was added dropwise, and the resulting mixture was stirred for 1 h. Then, 4-methoxybenzyl iodide<sup>[10]</sup> (7.44 g, 30 mmol, 1.5 equiv) was added, and the reaction mixture was stirred for 3 h. The reaction was quenched with saturated aqueous NH<sub>4</sub>Cl and extracted with EtOAc (3 x 20 mL). The combined organic layers were washed with brine, dried with anhydrous MgSO<sub>4</sub>, and concentrated *in vacuo*. The ester **S9** was used without further purification. Crude **S9** was dissolved in THF (40 mL, 0.50 M), and the solution was cooled to 0 °C. LiAlH<sub>4</sub> (1.1 g, 30 mmol, 1.5 equiv) was added portionwise, and the resulting mixture was stirred at 60 °C for 12 h. The reaction was cooled to rt and quenched using the Fieser method. The resulting mixture was filtered through celite and concentrated *in vacuo*. The crude material was purified by column chromatography (10% EtOAc in hexanes) to afford **S10** as a colorless oil (3.16 g, 61% yield). <sup>1</sup>H NMR (400 MHz, CDCl<sub>3</sub>) δ 7.14 (d, *J* = 8.5 Hz, 2H), 6.84 (d, *J* = 8.5 Hz, 2H), 5.02 (s, 1H), 4.95 (s, 1H), 4.90 (s, 1H), 4.87 (s, 1H), 3.80 (s, 3H), 3.55 (dd, *J* = 11.3, 3.7 Hz, 1H), 3.48 (dd, *J* = 11.3, 3.1 Hz, 1H), 2.81 (dd, *J* = 13.9, 3.1 Hz, 1H), 2.72 (d, *J* = 11.4 Hz, 1H), 2.47 (dd, *J* = 13.8, 10.5 Hz, 1H), 2.04 (ddd, *J* = 14.3, 7.2, 3.4 Hz, 1H), 1.76 (s, 3H), 1.69 (s, 3H), 1.39 (s, 1H). <sup>13</sup>C NMR (101 MHz, CDCl<sub>3</sub>) δ 158.0, 145.7, 144.5, 133.1, 130.2, 113.9, 112.8, 112.3, 61.8, 56.3, 55.4, 41.8, 34.0, 21.8, 20.2. IR (ATR): 3411, 2936, 1611, 1510, 1442, 1244, 1177, 1035, 890, 808 cm<sup>-1</sup>. HRMS calculated for C<sub>17</sub>H<sub>24</sub>O<sub>2</sub>Na [M+Na]<sup>+</sup> 283.1674, found 283.1687.

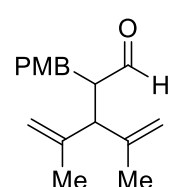

**2-(4-methoxybenzyl)-4-methyl-3-(prop-1-en-2-yl)pent-4-enal (8):** To an oven-dried round bottom flask was added oxalyl chloride (1.0 mL, 11.5 mmol, 1.3 equiv) and CH<sub>2</sub>Cl<sub>2</sub> (18 mL, 0.50 M). The mixture was cooled to -78 °C, and DMSO (1.9 mL, 26.5 mmol, 3 equiv) was added. The resulting mixture was stirred for 30 min. Alcohol **S10** (2.30 g, 8.83 mmol, 1.0 equiv) was added as a solution in CH<sub>2</sub>Cl<sub>2</sub> (18 mL, 0.50 M), and the resulting mixture was stirred for 30 min. Et<sub>3</sub>N (6.2 mL, 44.2 mmol, 5 equiv) was added, and the resulting mixture was allowed to warm to rt and stirred for 30 min. The reaction mixture was quenched with H<sub>2</sub>O and extracted with CH<sub>2</sub>Cl<sub>2</sub> (3 x 15 mL). The combined organic layers were washed with brine, dried with anhydrous MgSO<sub>4</sub>, and concentrated *in vacuo*. The residue was purified by column chromatography (5% EtOAc in hexanes) to afford **8** as a colorless oil (1.71 g, 75% yield). <sup>1</sup>H NMR (400 MHz, CDCl<sub>3</sub>) δ 9.50 (d, *J* = 3.1 Hz, 1H), 7.04 (d, *J* = 8.5 Hz, 2H), 6.81 (d, *J* = 8.5 Hz, 2H), 5.05 (s, 1H), 4.97 (s, 1H), 4.91 (s, 1H), 4.80 (s, 1H), 3.78 (s, 3H), 3.01 – 2.92 (m, 2H), 2.89 – 2.82 (m, 1H), 2.70 (dd, *J* = 14.4, 8.7 Hz, 1H), 1.71 (s, 3H), 1.67 (s, 3H). <sup>13</sup>C NMR (101 MHz, CDCl<sub>3</sub>) δ 204.5, 158.3, 143.7, 142.6, 130.7, 130.1, 114.4, 114.1, 113.6, 55.4, 55.1, 53.2, 34.0, 21.6, 19.9. IR (ATR): 2938, 2835, 1727, 1612, 1512, 1245, 1178, 1035, 896, 827 cm<sup>-1</sup>. HRMS calculated for C<sub>17</sub>H<sub>22</sub>O<sub>2</sub>Na [M+Na]<sup>+</sup> 281.1518, found 281.1515.

## Preparation of Aldehyde 1a-d

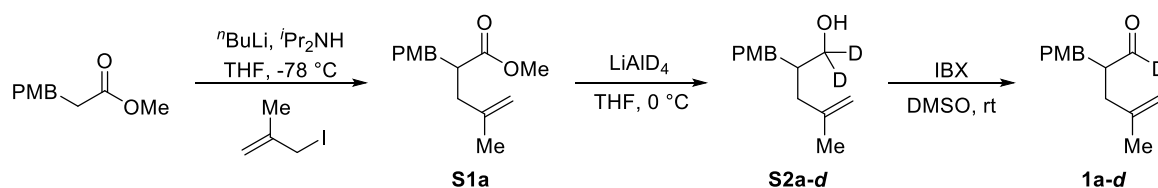

**2-(4-methoxybenzyl)-4-methylpent-4-en-1,1-d<sub>2</sub>-1-ol (S2a-d)**: To an oven-dried round bottom flask was added <sup>t</sup>Pr<sub>2</sub>NH (0.85 mL, 6.0 mmol, 1.2 equiv) and THF (10 mL, 0.33 M), and the resulting solution was cooled to -78 °C. Then, <sup>t</sup>BuLi (2.2 mL, 5.5 mmol, 1.1 equiv, 2.5 M in THF) was added dropwise, and the resulting mixture was allowed to stir for 45 min. A solution of methyl 3-(4-methoxyphenyl)propanoate (971 mg, 5.0 mmol, 1.0 equiv) in THF (5 mL) was added dropwise, and the resulting mixture was allowed to stir for 1 h. Then, methyl iodide (1.1 g, 6.0 mmol, 1.2 equiv) was added, and the reaction mixture was allowed to stir for 2 h. The reaction was quenched with saturated aqueous NH<sub>4</sub>Cl and extracted with EtOAc (3 x 15 mL). The combined organic layers were washed with brine, dried with anhydrous MgSO<sub>4</sub>, and concentrated *in vacuo*. The ester **S1a** was used without further purification. Crude **S1a** was dissolved in THF (10 mL, 0.50 M), and the solution was cooled to 0 °C. LiAlD<sub>4</sub> (315 mg, 7.5 mmol, 1.5 equiv) was added portionwise, and the resulting mixture was stirred for 1 h. The reaction was quenched using the Fieser method. The resulting mixture was filtered through celite and concentrated *in vacuo*. The crude material was purified by column chromatography (10% EtOAc in hexanes) to afford **S2a-d** as a colorless oil (478 mg, 43% yield). <sup>1</sup>H NMR (400 MHz, CDCl<sub>3</sub>) δ 7.11 (d, *J* = 8.5 Hz, 2H), 6.84 (d, *J* = 8.6 Hz, 2H), 4.81 (s, 1H), 4.78 (s, 1H), 3.80 (s, 3H), 2.58 (d, *J* = 6.8 Hz, 2H), 2.17 – 2.07 (m, 1H), 2.00 (ddd, *J* = 21.2, 13.9, 6.6 Hz, 2H), 1.73 (s, 3H), 1.37 (s, 1H). <sup>13</sup>C NMR (151 MHz, CDCl<sub>3</sub>) δ 158.0, 144.7, 132.7, 130.2, 113.9, 112.2, 65.1 – 63.7 (m), 55.4, 40.3, 40.3, 36.8, 22.4. IR (ATR): 3369, 2914, 1611, 1511, 1442, 1244, 1177, 1035, 888, 829 cm<sup>-1</sup>. HRMS calculated for C<sub>14</sub>H<sub>18</sub>D<sub>2</sub>O<sub>2</sub>Na [M+Na]<sup>+</sup> 245.1487, found 245.1489.

**2-(4-methoxybenzyl)-4-methylpent-4-enal-1-d (1a-d)**: To a round bottom flask was added alcohol **S2a-d** (453 mg, 2.0 mmol, 1.0 equiv) and DMSO (8 mL, 0.25 M). IBX<sup>[7]</sup> (628 mg, 2.2 mmol, 1.1 equiv) was added, and the resulting mixture was stirred overnight at rt. The reaction mixture was quenched with H<sub>2</sub>O (32 mL) and extracted with CH<sub>2</sub>Cl<sub>2</sub> (3 x 10 mL). The combined organic layers were washed with brine, dried with anhydrous MgSO<sub>4</sub>, and concentrated *in vacuo*. The residue was purified by column chromatography (5% EtOAc in hexanes) to afford **1a-d** as a colorless oil (365 mg, 82% yield). <sup>1</sup>H NMR (500 MHz, CDCl<sub>3</sub>) δ 7.09 (d, *J* = 8.5 Hz, 2H), 6.83 (d, *J* = 8.5 Hz, 2H), 4.84 (s, 1H), 4.75 (s, 1H), 3.79 (s, 3H), 2.90 (dd, *J* = 13.7, 7.5 Hz, 1H), 2.79 (dt, *J* = 13.9, 6.9 Hz, 1H), 2.71 (dd, *J* = 13.7, 6.1 Hz, 1H), 2.39 (dd, *J* = 14.8, 8.0 Hz, 1H), 2.15 (dd, *J* = 14.9, 6.3 Hz, 1H), 1.73 (s, 3H). <sup>13</sup>C NMR (101 MHz, CDCl<sub>3</sub>) δ 204.8 – 203.8 (m), 158.4, 142.3, 130.7, 130.1, 114.1, 113.0, 55.4, 51.4 – 51.2 (m), 37.2, 34.3, 22.6. IR (ATR): 2935, 2836, 1710, 1612, 1512, 1442, 1244, 1178, 1034, 830 cm<sup>-1</sup>. HRMS calculated for C<sub>14</sub>H<sub>17</sub>DO<sub>2</sub>Na [M+Na]<sup>+</sup> 242.1267, found 242.1273.

## 4. Esterification of 7a

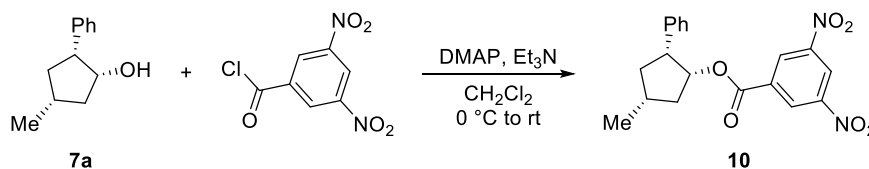

**(1R,2R,4R)-4-methyl-2-phenylcyclopentyl 3,5-dinitrobenzoate (10)**: Alcohol **7a** (20.8 mg, 0.12 mmol, 1.0 equiv) was dissolved in CH<sub>2</sub>Cl<sub>2</sub> (0.24 mL, 0.50 M) in a 1 dram vial equipped with a magnetic stir bar. Et<sub>3</sub>N (33 mL, 0.24 mmol, 2.0 equiv) and DMAP (1.4 mg, 0.012 mmol, 10 mol%) were added. The resulting solution was cooled to 0 °C, and 3,5-dinitrobenzoyl chloride (40.8 mg, 0.18 mmol, 1.5 equiv) was added. The vial was then sealed with a Teflon-lined screw cap and stirred overnight. The reaction mixture was quenched with H<sub>2</sub>O and extracted with CH<sub>2</sub>Cl<sub>2</sub> (3 x 5 mL). The

combined organic layers were washed with brine, dried with anhydrous  $\text{MgSO}_4$ , and concentrated *in vacuo*. The title compound was isolated by preparative thin-layer chromatography (30% EtOAc in hexanes) as a yellow solid (37.3 mg, 85% yield,  $[\alpha]_D^{24} = -112.2$  (c 0.56,  $\text{CHCl}_3$ )).  $^1\text{H NMR}$  (400 MHz,  $\text{CDCl}_3$ )  $\delta$  9.12 (t,  $J = 2.1$  Hz, 1H), 8.78 (d,  $J = 2.1$  Hz, 2H), 7.31 (dd,  $J = 12.6, 7.2$  Hz, 4H), 7.15 (t,  $J = 7.1$  Hz, 1H), 5.63 (td,  $J = 6.4, 3.6$  Hz, 1H), 3.51 – 3.38 (m, 1H), 2.72 – 2.55 (m, 1H), 2.35 – 2.16 (m, 2H), 2.01 – 1.89 (m, 1H), 1.59 (ddd,  $J = 14.4, 8.3, 3.5$  Hz, 1H), 1.32 – 1.11 (m, 4H).  $^{13}\text{C NMR}$  (101 MHz,  $\text{CDCl}_3$ )  $\delta$  162.0, 148.6, 139.0, 134.4, 129.2, 128.5, 128.4, 126.9, 122.1, 81.0, 50.3, 41.6, 38.5, 32.4, 21.0. **IR** (ATR): 3113, 2956, 1715, 1630, 1546, 1460, 1344, 1287, 1174, 754  $\text{cm}^{-1}$ .

## 5. Oxidative Decomposition of 6a

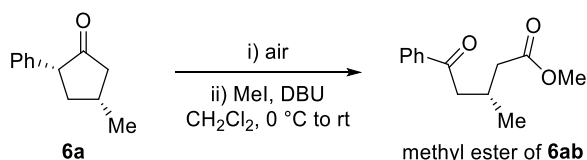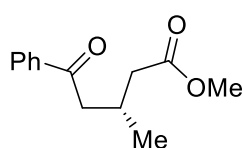

**methyl (R)-3-methyl-5-oxo-5-phenylpentanoate:** Ketone **6a** (12.0 mg, 0.069 mmol, 1.0 equiv) was allowed to stand in a 1 dram vial opened to air until full consumption of **6a** was observed by  $^1\text{H NMR}$  (ca. 2 weeks). Then,  $\text{CH}_2\text{Cl}_2$  (0.20 mL) and DBU (15 mL, 0.10 mmol, 1.5 equiv) was added to the crude material. The resulting mixture was cooled to 0 °C, and MeI (8.6 mL, 0.14 mmol, 2.0 equiv) was added. The vial

was then sealed with a Teflon-lined screw cap and stirred overnight. The reaction mixture was concentrated *in vacuo*. The title compound was isolated by preparative thin-layer chromatography (5% EtOAc in hexanes) as a colorless oil (4.5 mg, 30% yield,  $[\alpha]_D^{24} = +3.7$  (c 0.30,  $\text{CHCl}_3$ )).  $^1\text{H NMR}$  (400 MHz,  $\text{CDCl}_3$ )  $\delta$  7.98 (d,  $J = 7.4$  Hz, 2H), 7.57 (t,  $J = 7.4$  Hz, 1H), 7.47 (t,  $J = 7.6$  Hz, 2H), 3.68 (s, 3H), 3.11 (dd,  $J = 16.2, 5.9$  Hz, 1H), 2.85 (dd,  $J = 16.3, 7.5$  Hz, 1H), 2.69 (dq,  $J = 13.5, 6.7$  Hz, 1H), 2.45 (dd,  $J = 15.3, 6.6$  Hz, 1H), 2.33 (dd,  $J = 15.3, 7.0$  Hz, 1H), 1.06 (d,  $J = 6.7$  Hz, 3H).  $^{13}\text{C NMR}$  (126 MHz,  $\text{CDCl}_3$ )  $\delta$  199.4, 173.2, 137.2, 133.2, 128.8, 128.3, 51.6, 45.0, 41.1, 27.0, 20.3. **IR** (ATR): 2954, 1732, 1682, 1448, 1368, 1211, 1159, 1002, 753, 690  $\text{cm}^{-1}$ . **HRMS** calculated for  $\text{C}_{13}\text{H}_{16}\text{O}_3\text{Na}$   $[\text{M}+\text{Na}]^+$  243.0997, found 243.0996.

## 6. Hydroacylation of Aldehyde 8

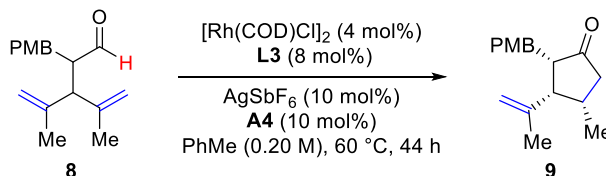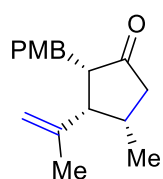

**(2S,3R,4S)-2-(4-methoxybenzyl)-4-methyl-3-(prop-1-en-2-yl)cyclopentan-1-one (9):** In a  $\text{N}_2$ -filled glovebox,  $[\text{Rh}(\text{COD})\text{Cl}]_2$  (2.0 mg, 0.0040 mmol, 4 mol%), (*R*)-DTBM-Segphos (10.7 mg, 0.0080 mmol, 8 mol%), and toluene (0.50 mL, 0.20 M) were added to a 1 dram vial equipped with a magnetic stir bar. The solution was stirred at 30 °C for 10 min.  $\text{AgSbF}_6$  (3.4 mg, 0.010 mmol, 10 mol%), was added, and the resulting mixture was stirred 30 °C for 30 min. Aldehyde **8** (25.8 mg, 0.10 mmol, 1.0 equiv) and 1-AdNH<sub>2</sub> (1.5 mg, 0.010 mmol, 10 mol%) were added. The

vial was then sealed with a Teflon-lined screw cap and stirred at 60 °C for 44 h. The reaction mixture was cooled to rt, filtered through celite, and concentrated *in vacuo*. The diastereoselectivity was determined by  $^1\text{H NMR}$  analysis of the unpurified reaction mixture. The title compound was isolated by preparative thin-layer chromatography (5% EtOAc in hexanes) as a colorless oil (13.7 mg, 53% yield, >20:1:1:1 *dr*, >99% *ee*,  $[\alpha]_D^{24} = +74.3$  (c 0.56,  $\text{CHCl}_3$ )).  $^1\text{H NMR}$  (400 MHz,  $\text{CDCl}_3$ )  $\delta$  7.09 – 7.01 (m, 2H), 6.81 – 6.74 (m, 2H), 4.93 (dq,  $J = 2.9, 1.4$  Hz, 1H), 4.83 (dd,  $J = 1.5, 0.6$  Hz, 1H), 3.78 (s, 3H), 2.92 (dd,  $J = 14.1, 4.5$  Hz, 1H), 2.72 (dd,  $J = 14.1, 5.5$  Hz, 1H), 2.56 – 2.45 (m, 1H), 2.45 – 2.35 (m, 1H), 2.08 – 1.91 (m, 2H), 1.68 – 1.54 (m, 4H), 0.97 (d,  $J = 6.1$  Hz, 3H).  $^{13}\text{C NMR}$  (101 MHz,  $\text{CDCl}_3$ )  $\delta$  218.3, 158.1, 142.8, 131.4, 131.0, 115.1, 113.6, 57.2, 55.33, 55.26, 46.6, 32.9, 32.3, 17.88, 17.76. **IR** (ATR): 2954, 2915, 1738, 1611, 1511, 1441, 1244, 1177, 1035, 893  $\text{cm}^{-1}$ . **HRMS** calculated for  $\text{C}_{17}\text{H}_{22}\text{O}_2\text{Na}$   $[\text{M}+\text{Na}]^+$  281.1518, found 281.1507. **Chiral SFC:** 250 mm CHIRALPAK IC, 3% *i*-PrOH, 2.0 mL/min, 220 nm, 44 °C, nozzle pressure = 200 bar  $\text{CO}_2$ ,  $t_{R1} = 13.6$  min (minor),  $t_{R2} = 14.8$  min (major).

## 7. Deuterium Labeling Experiment

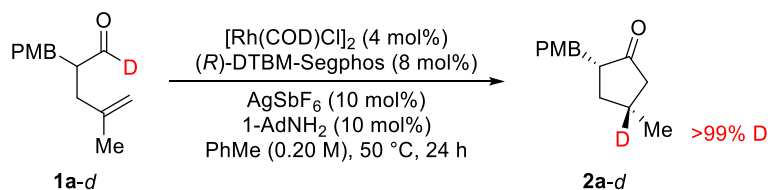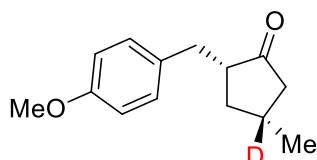

**(2R,4R)-2-(4-methoxybenzyl)-4-methylcyclopentan-1-one-4-d (2a-d):** In a N<sub>2</sub>-filled glovebox, [Rh(COD)Cl]<sub>2</sub> (2.0 mg, 0.0040 mmol, 4 mol%), (*R*)-DTBM-Segphos (10.7 mg, 0.0080 mmol, 8 mol%), and toluene (0.50 mL, 0.20 M) were added to a 1 dram vial equipped with a magnetic stir bar. The solution was stirred at 30 °C for 10 min. AgSbF<sub>6</sub> (3.4 mg, 0.010 mmol, 10 mol%), was added, and the resulting mixture was stirred 30 °C for 30 min. Aldehyde **1a-d** (21.9 mg, 0.10 mmol,

1.0 equiv) and 1-AdNH<sub>2</sub> (1.5 mg, 0.010 mmol, 10 mol%) were added. The vial was then sealed with a Teflon-lined screw cap and stirred at 50 °C for 24 h. The reaction mixture was cooled to rt, filtered through celite, and concentrated *in vacuo*. The diastereoselectivity was determined by <sup>1</sup>H NMR analysis of the unpurified reaction mixture. The title compound was isolated by preparative thin-layer chromatography (5% EtOAc in hexanes) as a white solid (18.2 mg, 83% yield, >20:1 *dr*, >99% *ee*, [α]<sub>D</sub><sup>24</sup> = +71.2 (c 0.78, CHCl<sub>3</sub>)). <sup>1</sup>H NMR (400 MHz, CDCl<sub>3</sub>) δ 7.08 (d, *J* = 8.5 Hz, 2H), 6.83 (d, *J* = 8.6 Hz, 2H), 3.79 (s, 3H), 3.11 (dd, *J* = 13.8, 3.9 Hz, 1H), 2.56 – 2.44 (m, 2H), 2.44 – 2.35 (m, 1H), 2.20 – 2.10 (m, 1H), 1.71 (d, *J* = 18.5 Hz, 1H), 1.15 (t, *J* = 12.4 Hz, 1H), 1.09 (s, 3H). <sup>13</sup>C NMR (126 MHz, CDCl<sub>3</sub>) δ 219.9, 158.1, 132.2, 129.9, 114.0, 55.4, 53.1, 46.9, 38.2, 34.8, 29.3 (t, *J* = 19.6 Hz), 20.2. IR (ATR): 2953, 2867, 1736, 1611, 1511, 1455, 1243, 1177, 1034, 818 cm<sup>-1</sup>. HRMS calculated for C<sub>14</sub>H<sub>17</sub>DO<sub>2</sub>Na [M+Na]<sup>+</sup> 242.1267, found 242.1278. Chiral SFC: 100 mm CHIRALPAK AD-H, 1% *i*-PrOH, 2.0 mL/min, 220 nm, 44 °C, nozzle pressure = 200 bar CO<sub>2</sub>, t<sub>R1</sub> = 5.8 min (major), t<sub>R2</sub> = 7.9 min (minor).

## 8. Kinetic Isotope Effect Experiment

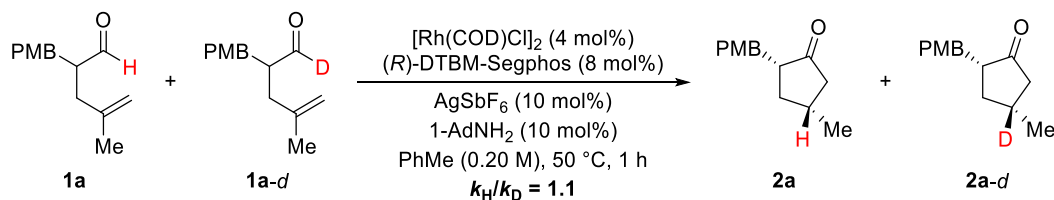

In a N<sub>2</sub>-filled glovebox, [Rh(COD)Cl]<sub>2</sub> (2.0 mg, 0.0040 mmol), (*R*)-DTBM-Segphos (10.7 mg, 0.0080 mmol), and toluene (0.25 mL) were added to a 1 dram vial equipped with a magnetic stir bar. The solution was stirred at 30 °C for 10 min. AgSbF<sub>6</sub> (3.4 mg, 0.010 mmol) was added, and the resulting mixture was stirred 30 °C for 30 min. Aldehydes **1a** (11.0 mg, 0.050 mmol) and **1a-d** (11.0 mg, 0.050 mmol) were added as a solution in toluene (0.25 mL). Then, 1-AdNH<sub>2</sub> (1.5 mg, 0.010 mmol) was added. The vial was then sealed with a Teflon-lined screw cap and stirred at 50 °C for 1 h. The reaction mixture was cooled to rt, filtered through celite, and concentrated *in vacuo*. The diastereoselectivity was determined by <sup>1</sup>H NMR analysis of the unpurified reaction mixture. The crude mixture was purified by preparative thin-layer chromatography (5% EtOAc in hexanes) to afford a mixture of **2a** and **2a-d** (3.9 mg, 18% yield). The ratio (1.1:1.0) of **2a** and **2a-d** was determined by <sup>1</sup>H NMR.

<sup>1</sup>H NMR (400 MHz, CDCl<sub>3</sub>) δ 7.08 (d, *J* = 8.5 Hz, 2H), 6.83 (d, *J* = 8.6 Hz, 2H), 3.79 (s, 3H), 3.11 (dd, *J* = 13.7, 3.9 Hz, 1H), 2.55 – 2.45 (m, 2H), 2.44 – 2.35 (m, 1H), 2.16 (d, *J* = 12.1 Hz, 1H), 2.12 – 2.03 (m, **0.54H**), 1.77 – 1.66 (m, 1H), 1.22 – 1.12 (m, 1H), 1.10 (d, *J* = 6.3 Hz, 3H).

Recovered unreacted **1a** and **1a-d** (19.3 mg, 88% yield): <sup>1</sup>H NMR (400 MHz, CDCl<sub>3</sub>) δ 9.66 (d, *J* = 2.5 Hz, **0.43H**), 7.09 (d, *J* = 8.6 Hz, 2H), 6.83 (d, *J* = 8.6 Hz, 2H), 4.84 (s, 1H), 4.75 (s, 1H), 3.79 (s, 3H), 2.90 (dd, *J* = 13.4, 7.4 Hz, 1H), 2.83 – 2.74 (m, 1H), 2.71 (dd, *J* = 13.4, 6.0 Hz, 1H), 2.39 (dd, *J* = 14.8, 7.9 Hz, 1H), 2.15 (dd, *J* = 14.7, 6.2 Hz, 1H), 1.72 (s, 3H).



## 9. Gram-scale Dynamic Kinetic Resolution of 1a

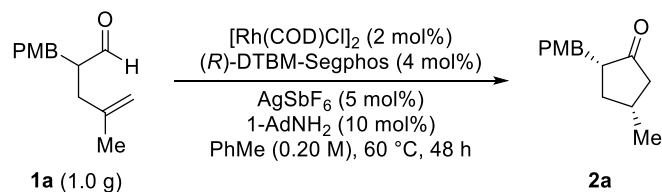

In a N<sub>2</sub>-filled glovebox,  $[\text{Rh}(\text{COD})\text{Cl}]_2$  (45.2 mg, 0.092 mmol, 2 mol%), (*R*)-DTBM-Segphos (216 mg, 0.183 mmol, 4 mol%), and toluene (23 mL, 0.20 M) were added to an oven-dried round bottom flask equipped with a magnetic stir bar. The solution was stirred at 30 °C for 15 min.  $\text{AgSbF}_6$  (78.7 mg, 0.229 mmol, 5 mol%) was added, and the resulting mixture was stirred 30 °C for 30 min. Aldehyde **1a** (1.0 g, 4.58 mmol, 1.0 equiv) and 1-AdNH<sub>2</sub> (69.3 mg, 0.458 mmol, 10 mol%) were added sequentially. The flask was then sealed with a rubber septum and removed from the glovebox. A N<sub>2</sub>-filled balloon was attached, and the reaction was stirred at 60 °C for 48 h. The reaction mixture was cooled to rt, filtered through celite, and concentrated *in vacuo*. The diastereoselectivity was determined by <sup>1</sup>H NMR analysis of the unpurified reaction mixture. The crude mixture was purified by column chromatography (5% EtOAc in hexanes) to afford **2a** as a light yellow solid (891 mg, 89% yield, >20:1 *dr*, >99% *ee*). The <sup>1</sup>H NMR data matched those for **2a** obtained by following general Method A (page 4). <sup>1</sup>H NMR (400 MHz, CDCl<sub>3</sub>) δ 7.08 (d, *J* = 8.5 Hz, 2H), 6.82 (d, *J* = 8.5 Hz, 2H), 3.79 (s, 3H), 3.11 (dd, *J* = 13.8, 4.0 Hz, 1H), 2.56 – 2.45 (m, 2H), 2.40 (dtd, *J* = 12.4, 8.1, 4.1 Hz, 1H), 2.21 – 2.03 (m, 2H), 1.71 (dd, *J* = 18.4, 11.3 Hz, 1H), 1.21 – 1.11 (m, 1H), 1.10 (d, *J* = 6.3 Hz, 3H).

## 10. X-ray Crystallographic Data

X-ray Crystallographic Data for **2a** (CCDC 1869120)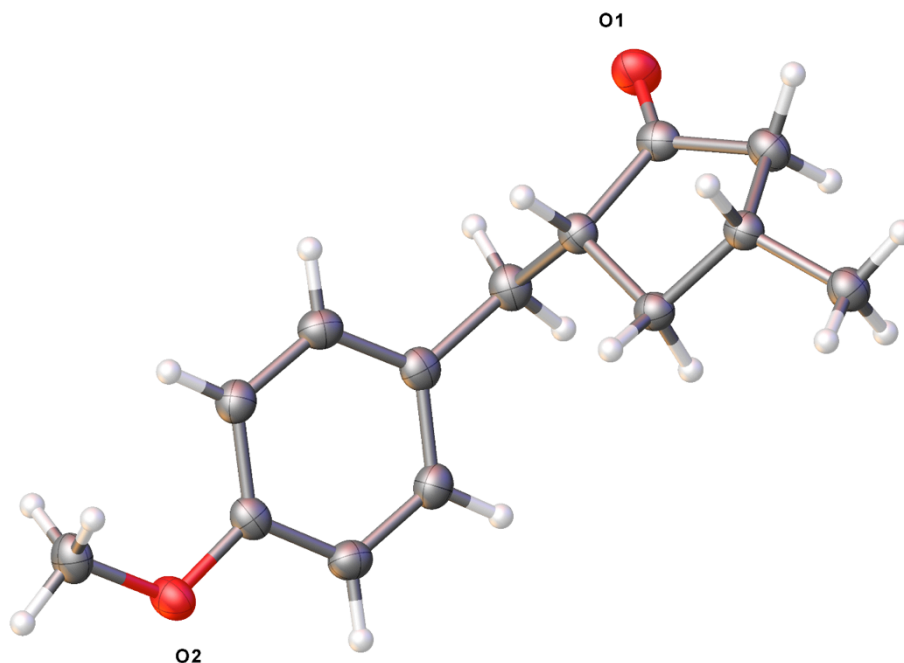

The single crystal X-ray diffraction studies were carried out on a Bruker Kappa APEX-II CCD diffractometer equipped with Cu K<sub>α</sub> radiation ( $\lambda = 1.5478$ ). A 0.153 x 0.067 x 0.042 mm piece of a colorless block was mounted on a Cryoloop with Paratone oil. Data were collected in a nitrogen gas stream at 100(2) K using  $\omega$  and  $\nu$  scans. Crystal-to-detector distance was 40 mm using variable exposure time (5s-20s) depending on  $q$  with a scan width of 2.0°. Data collection was 99.0% complete to 68.00° in  $q$ . A total of 12765 reflections were collected covering the indices,  $-5 \leq h \leq 6$ ,  $-11 \leq k \leq 11$ ,  $-14 \leq l \leq 14$ . 2136 reflections were found to be symmetry independent, with a  $R_{\text{int}}$  of 0.0286. Indexing and unit cell refinement indicated a primitive, monoclinic lattice. The space

group was found to be  $P2_1$ . The data were integrated using the Bruker SAINT software program and scaled using the SADABS software program. Solution by direct methods (SHELXT) produced a complete phasing model consistent with the proposed structure.

All nonhydrogen atoms were refined anisotropically by full-matrix least-squares (SHELXL-2014). All hydrogen atoms were placed using a riding model. Their positions were constrained relative to their parent atom using the appropriate HFIX command in SHELXL-2014. The absolute stereochemistry of the molecule was established by anomalous dispersion using the Parson's method with a Flack parameter of 0.022(64). Crystallographic data are summarized in Table S1.

Table S1. Crystal data and structure refinement for UCI\_Dong\_11-ZC-4.

|                                 |                                                |                             |
|---------------------------------|------------------------------------------------|-----------------------------|
| Report date                     | 2018-06-27                                     |                             |
| Identification code             | 11-ZC-4                                        |                             |
| Empirical formula               | C <sub>14</sub> H <sub>18</sub> O <sub>2</sub> |                             |
| Molecular formula               | C <sub>14</sub> H <sub>18</sub> O <sub>2</sub> |                             |
| Formula weight                  | 218.28                                         |                             |
| Temperature                     | 100.0 K                                        |                             |
| Wavelength                      | 1.54178 Å                                      |                             |
| Crystal system                  | Monoclinic                                     |                             |
| Space group                     | P 1 21 1                                       |                             |
| Unit cell dimensions            | a = 5.1826(3) Å                                | $\alpha = 90^\circ$ .       |
|                                 | b = 9.6599(5) Å                                | $\beta = 93.160(2)^\circ$ . |
|                                 | c = 11.8510(6) Å                               | $\gamma = 90^\circ$ .       |
| Volume                          | 592.40(5) Å <sup>3</sup>                       |                             |
| Z                               | 2                                              |                             |
| Density (calculated)            | 1.224 Mg/m <sup>3</sup>                        |                             |
| Absorption coefficient          | 0.634 mm <sup>-1</sup>                         |                             |
| F(000)                          | 236                                            |                             |
| Crystal size                    | 0.153 x 0.067 x 0.042 mm <sup>3</sup>          |                             |
| Crystal color, habit            | Colorless Block                                |                             |
| Theta range for data collection | 3.735 to 68.149°.                              |                             |
| Index ranges                    | -5 ≤ h ≤ 6, -11 ≤ k ≤ 11, -14 ≤ l ≤ 14         |                             |
| Reflections collected           | 12765                                          |                             |

|                                   |                                             |
|-----------------------------------|---------------------------------------------|
| Independent reflections           | 2136 [R(int) = 0.0286, R(sigma) = 0.0187]   |
| Completeness to theta = 68.000°   | 99.0 %                                      |
| Absorption correction             | Semi-empirical from equivalents             |
| Max. and min. transmission        | 0.3200 and 0.2284                           |
| Refinement method                 | Full-matrix least-squares on F <sup>2</sup> |
| Data / restraints / parameters    | 2136 / 1 / 147                              |
| Goodness-of-fit on F <sup>2</sup> | 1.043                                       |
| Final R indices [I>2sigma(I)]     | R1 = 0.0264, wR2 = 0.0670                   |
| R indices (all data)              | R1 = 0.0272, wR2 = 0.0674                   |
| Absolute structure parameter      | 0.02(6)                                     |
| Extinction coefficient            | n/a                                         |
| Largest diff. peak and hole       | 0.114 and -0.130 e.Å <sup>-3</sup>          |

Table S2. Atomic coordinates (  $\times 10^4$ ) and equivalent isotropic displacement parameters ( $\text{\AA}^2 \times 10^3$ ) for UCI\_Dong\_11-ZC-4. U(eq) is defined as one third of the trace of the orthogonalized  $U^{ij}$  tensor.

|      | x        | y       | z        | U(eq) |
|------|----------|---------|----------|-------|
| O(1) | 10292(3) | 2748(1) | 5621(1)  | 32(1) |
| O(2) | 976(3)   | 6936(1) | 10207(1) | 31(1) |
| C(1) | 8554(3)  | 3506(2) | 5284(2)  | 25(1) |
| C(2) | 7910(4)  | 3901(2) | 4069(2)  | 27(1) |
| C(3) | 5249(3)  | 4593(2) | 4073(1)  | 24(1) |
| C(4) | 5314(4)  | 5292(2) | 5244(1)  | 24(1) |
| C(5) | 6663(3)  | 4229(2) | 6033(1)  | 23(1) |
| C(6) | 7990(4)  | 4765(2) | 7133(2)  | 28(1) |
| C(7) | 6116(4)  | 5325(2) | 7949(1)  | 24(1) |
| C(8) | 4598(3)  | 4437(2) | 8553(2)  | 27(1) |

|       |         |         |          |       |
|-------|---------|---------|----------|-------|
| C(9)  | 2833(4) | 4918(2) | 9306(2)  | 26(1) |
| C(10) | 2584(3) | 6336(2) | 9469(1)  | 25(1) |
| C(11) | 4082(4) | 7246(2) | 8871(2)  | 28(1) |
| C(12) | 5821(4) | 6744(2) | 8123(2)  | 27(1) |
| C(13) | 4690(4) | 5572(2) | 3088(2)  | 28(1) |
| C(14) | -674(4) | 6038(2) | 10795(2) | 31(1) |

Table S3. Bond lengths [ $\text{\AA}$ ] and angles [ $^\circ$ ] for UCI\_Dong\_11-ZC-4.

|             |          |                   |            |
|-------------|----------|-------------------|------------|
| O(1)-C(1)   | 1.212(2) | C(2)-C(3)-C(4)    | 102.64(14) |
| O(2)-C(10)  | 1.370(2) | C(13)-C(3)-C(2)   | 113.76(15) |
| O(2)-C(14)  | 1.426(2) | C(13)-C(3)-C(4)   | 114.42(15) |
| C(1)-C(2)   | 1.509(3) | C(5)-C(4)-C(3)    | 104.03(14) |
| C(1)-C(5)   | 1.526(2) | C(1)-C(5)-C(4)    | 103.81(14) |
| C(2)-C(3)   | 1.533(3) | C(1)-C(5)-C(6)    | 112.14(14) |
| C(3)-C(4)   | 1.542(2) | C(4)-C(5)-C(6)    | 117.49(15) |
| C(3)-C(13)  | 1.518(3) | C(7)-C(6)-C(5)    | 113.12(14) |
| C(4)-C(5)   | 1.530(2) | C(8)-C(7)-C(6)    | 120.79(16) |
| C(5)-C(6)   | 1.531(2) | C(8)-C(7)-C(12)   | 117.44(17) |
| C(6)-C(7)   | 1.509(2) | C(12)-C(7)-C(6)   | 121.77(17) |
| C(7)-C(8)   | 1.389(3) | C(7)-C(8)-C(9)    | 122.31(17) |
| C(7)-C(12)  | 1.395(3) | C(10)-C(9)-C(8)   | 119.19(17) |
| C(8)-C(9)   | 1.392(3) | O(2)-C(10)-C(9)   | 124.77(16) |
| C(9)-C(10)  | 1.390(3) | O(2)-C(10)-C(11)  | 115.73(15) |
| C(10)-C(11) | 1.392(3) | C(9)-C(10)-C(11)  | 119.49(16) |
| C(11)-C(12) | 1.386(3) | C(12)-C(11)-C(10) | 120.34(17) |

|                  |            |
|------------------|------------|
| C(11)-C(12)-C(7) | 121.23(17) |
| C(10)-O(2)-C(14) | 117.18(14) |
| O(1)-C(1)-C(2)   | 126.03(18) |
| O(1)-C(1)-C(5)   | 125.09(17) |
| C(2)-C(1)-C(5)   | 108.87(15) |
| C(1)-C(2)-C(3)   | 105.00(15) |

Table S4. Anisotropic displacement parameters ( $\text{\AA}^2 \times 10^3$ ) for UCI\_Dong\_11-ZC-4. The anisotropic displacement factor exponent takes the form:  $-2\pi^2 [ h^2 a^{*2} U^{11} + \dots + 2 h k a^* b^* U^{12} ]$

|       | U <sup>11</sup> | U <sup>22</sup> | U <sup>33</sup> | U <sup>23</sup> | U <sup>13</sup> | U <sup>12</sup> |
|-------|-----------------|-----------------|-----------------|-----------------|-----------------|-----------------|
| O(1)  | 26(1)           | 36(1)           | 35(1)           | 0(1)            | 1(1)            | 8(1)            |
| O(2)  | 28(1)           | 32(1)           | 34(1)           | -5(1)           | 8(1)            | -1(1)           |
| C(1)  | 18(1)           | 25(1)           | 31(1)           | -2(1)           | 2(1)            | -2(1)           |
| C(2)  | 23(1)           | 31(1)           | 28(1)           | -3(1)           | 3(1)            | 1(1)            |
| C(3)  | 21(1)           | 24(1)           | 26(1)           | -1(1)           | 2(1)            | -1(1)           |
| C(4)  | 22(1)           | 23(1)           | 26(1)           | -1(1)           | 2(1)            | 1(1)            |
| C(5)  | 19(1)           | 26(1)           | 25(1)           | 0(1)            | 2(1)            | -1(1)           |
| C(6)  | 22(1)           | 34(1)           | 26(1)           | 0(1)            | -1(1)           | -1(1)           |
| C(7)  | 22(1)           | 29(1)           | 21(1)           | 0(1)            | -4(1)           | 0(1)            |
| C(8)  | 26(1)           | 25(1)           | 29(1)           | -1(1)           | -2(1)           | 0(1)            |
| C(9)  | 24(1)           | 28(1)           | 26(1)           | 1(1)            | 0(1)            | -3(1)           |
| C(10) | 20(1)           | 31(1)           | 23(1)           | -2(1)           | -1(1)           | 1(1)            |
| C(11) | 29(1)           | 24(1)           | 29(1)           | 0(1)            | -1(1)           | 2(1)            |
| C(12) | 26(1)           | 30(1)           | 25(1)           | 4(1)            | 0(1)            | -2(1)           |
| C(13) | 27(1)           | 31(1)           | 26(1)           | -1(1)           | 1(1)            | 1(1)            |

---

C(14) 24(1) 40(1) 29(1) 1(1) 5(1) 1(1)

---

Table S5. Hydrogen coordinates ( $\times 10^4$ ) and isotropic displacement parameters ( $\text{\AA}^2 \times 10^3$ ) for UCI\_Dong\_11-ZC-4.

---

|        | x     | y    | z     | U(eq) |
|--------|-------|------|-------|-------|
| H(2A)  | 7845  | 3070 | 3579  | 32    |
| H(2B)  | 9213  | 4551 | 3795  | 32    |
| H(3)   | 3895  | 3855 | 4049  | 28    |
| H(4A)  | 6300  | 6169 | 5242  | 28    |
| H(4B)  | 3543  | 5486 | 5476  | 28    |
| H(5)   | 5341  | 3532 | 6237  | 28    |
| H(6A)  | 8994  | 4002 | 7502  | 33    |
| H(6B)  | 9221  | 5506 | 6952  | 33    |
| H(8)   | 4770  | 3467 | 8449  | 32    |
| H(9)   | 1813  | 4286 | 9703  | 31    |
| H(11)  | 3912  | 8216 | 8976  | 33    |
| H(12)  | 6831  | 7377 | 7721  | 32    |
| H(13A) | 2989  | 5998 | 3155  | 42    |
| H(13B) | 4706  | 5055 | 2377  | 42    |
| H(13C) | 6016  | 6296 | 3096  | 42    |
| H(14A) | -1835 | 5550 | 10249 | 46    |
| H(14B) | -1696 | 6584 | 11306 | 46    |
| H(14C) | 377   | 5364 | 11234 | 46    |

---

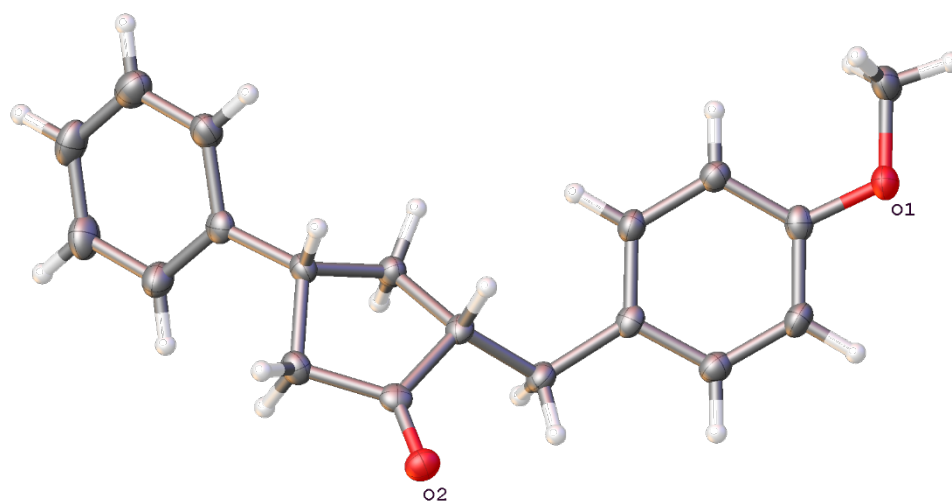

Table S6. Crystal data and structure refinement for UCIDong\_16b\_0m\_a.

|                                   |                                                |                 |
|-----------------------------------|------------------------------------------------|-----------------|
| Identification code               | ucidong_16b_0m_a                               |                 |
| Empirical formula                 | C <sub>19</sub> H <sub>20</sub> O <sub>2</sub> |                 |
| Formula weight                    | 280.35                                         |                 |
| Temperature                       | 100.0 K                                        |                 |
| Wavelength                        | 1.54178 Å                                      |                 |
| Crystal system                    | Monoclinic                                     |                 |
| Space group                       | P 21                                           |                 |
| Unit cell dimensions              | a = 7.7848(5) Å                                | α = 90°.        |
|                                   | b = 6.8098(4) Å                                | β = 91.804(3)°. |
|                                   | c = 14.0541(7) Å                               | γ = 90°.        |
| Volume                            | 744.68(7) Å <sup>3</sup>                       |                 |
| Z                                 | 2                                              |                 |
| Density (calculated)              | 1.250 Mg/m <sup>3</sup>                        |                 |
| Absorption coefficient            | 0.626 mm <sup>-1</sup>                         |                 |
| F(000)                            | 300                                            |                 |
| Crystal size                      | 0.30 x 0.29 x 0.28 mm <sup>3</sup>             |                 |
| Theta range for data collection   | 3.146 to 68.286°.                              |                 |
| Index ranges                      | -9 ≤ h ≤ 9, -8 ≤ k ≤ 8, -16 ≤ l ≤ 16           |                 |
| Reflections collected             | 8800                                           |                 |
| Independent reflections           | 2712 [R(int) = 0.0327]                         |                 |
| Completeness to theta = 67.679°   | 99.8 %                                         |                 |
| Absorption correction             | Semi-empirical from equivalents                |                 |
| Max. and min. transmission        | 0.3201 and 0.2289                              |                 |
| Refinement method                 | Full-matrix least-squares on F <sup>2</sup>    |                 |
| Data / restraints / parameters    | 2712 / 1 / 191                                 |                 |
| Goodness-of-fit on F <sup>2</sup> | 1.091                                          |                 |
| Final R indices [I > 2σ(I)]       | R1 = 0.0315, wR2 = 0.0768                      |                 |
| R indices (all data)              | R1 = 0.0318, wR2 = 0.0771                      |                 |
| Absolute structure parameter      | 0.01(6)                                        |                 |
| Extinction coefficient            | n/a                                            |                 |
| Largest diff. peak and hole       | 0.240 and -0.153 e.Å <sup>-3</sup>             |                 |

Table S7. Atomic coordinates ( $\times 10^4$ ) and equivalent isotropic displacement parameters ( $\text{\AA}^2 \times 10^3$ ) for UCIDong\_16b\_0m\_a.  $U(\text{eq})$  is defined as one third of the trace of the orthogonalized  $U^{\text{ij}}$  tensor.

|       | x       | y       | z       | U(eq) |
|-------|---------|---------|---------|-------|
| O(1)  | 574(2)  | 7987(2) | 1024(1) | 30(1) |
| O(2)  | 3074(2) | 117(2)  | 5242(1) | 29(1) |
| C(1)  | 1350(3) | 9883(3) | 982(1)  | 34(1) |
| C(2)  | 716(2)  | 7020(3) | 1878(1) | 25(1) |
| C(3)  | 1543(2) | 7758(3) | 2694(1) | 25(1) |
| C(4)  | 1644(2) | 6612(3) | 3519(1) | 26(1) |
| C(5)  | 942(2)  | 4738(3) | 3553(1) | 24(1) |
| C(6)  | 72(2)   | 4054(3) | 2732(1) | 27(1) |
| C(7)  | -42(2)  | 5160(3) | 1909(1) | 29(1) |
| C(8)  | 1072(2) | 3421(3) | 4423(1) | 25(1) |
| C(9)  | 2688(2) | 3650(2) | 5067(1) | 23(1) |
| C(10) | 3158(2) | 1748(3) | 5592(1) | 23(1) |
| C(11) | 3762(2) | 2233(3) | 6598(1) | 27(1) |
| C(12) | 4100(2) | 4442(2) | 6577(1) | 23(1) |
| C(13) | 2675(2) | 5166(3) | 5871(1) | 25(1) |
| C(14) | 4165(2) | 5543(2) | 7513(1) | 24(1) |
| C(15) | 5160(2) | 7241(3) | 7592(1) | 31(1) |
| C(16) | 5219(3) | 8340(3) | 8425(1) | 36(1) |
| C(17) | 4280(3) | 7758(3) | 9198(1) | 36(1) |
| C(18) | 3286(3) | 6079(3) | 9130(1) | 36(1) |
| C(19) | 3230(2) | 4970(3) | 8296(1) | 31(1) |

Table S8. Bond lengths [ $\text{\AA}$ ] and angles [ $^\circ$ ] for UCIDong\_16b\_0m\_a.

|            |          |
|------------|----------|
| O(1)-C(1)  | 1.428(2) |
| O(1)-C(2)  | 1.370(2) |
| O(2)-C(10) | 1.215(2) |
| C(1)-H(1A) | 0.9800   |
| C(1)-H(1B) | 0.9800   |
| C(1)-H(1C) | 0.9800   |
| C(2)-C(3)  | 1.392(2) |
| C(2)-C(7)  | 1.399(3) |



---

|                 |            |
|-----------------|------------|
| C(3)-H(3)       | 0.9500     |
| C(3)-C(4)       | 1.398(2)   |
| C(4)-H(4)       | 0.9500     |
| C(4)-C(5)       | 1.389(3)   |
| C(5)-C(6)       | 1.399(2)   |
| C(5)-C(8)       | 1.518(2)   |
| C(6)-H(6)       | 0.9500     |
| C(6)-C(7)       | 1.381(3)   |
| C(7)-H(7)       | 0.9500     |
| C(8)-H(8B)      | 0.9900     |
| C(8)-H(8A)      | 0.9900     |
| C(8)-C(9)       | 1.534(2)   |
| C(9)-H(9)       | 1.0000     |
| C(9)-C(10)      | 1.529(2)   |
| C(9)-C(13)      | 1.531(2)   |
| C(10)-C(11)     | 1.513(2)   |
| C(11)-H(11A)    | 0.9900     |
| C(11)-H(11B)    | 0.9900     |
| C(11)-C(12)     | 1.528(2)   |
| C(12)-H(12)     | 1.0000     |
| C(12)-C(13)     | 1.545(2)   |
| C(12)-C(14)     | 1.514(2)   |
| C(13)-H(13A)    | 0.9900     |
| C(13)-H(13B)    | 0.9900     |
| C(14)-C(15)     | 1.394(3)   |
| C(14)-C(19)     | 1.394(3)   |
| C(15)-H(15)     | 0.9500     |
| C(15)-C(16)     | 1.389(3)   |
| C(16)-H(16)     | 0.9500     |
| C(16)-C(17)     | 1.386(3)   |
| C(17)-H(17)     | 0.9500     |
| C(17)-C(18)     | 1.382(3)   |
| C(18)-H(18)     | 0.9500     |
| C(18)-C(19)     | 1.394(3)   |
| C(19)-H(19)     | 0.9500     |
| <br>            |            |
| C(2)-O(1)-C(1)  | 116.63(13) |
| O(1)-C(1)-H(1A) | 109.5      |
| O(1)-C(1)-H(1B) | 109.5      |

---

|                    |            |
|--------------------|------------|
| O(1)-C(1)-H(1C)    | 109.5      |
| H(1A)-C(1)-H(1B)   | 109.5      |
| H(1A)-C(1)-H(1C)   | 109.5      |
| H(1B)-C(1)-H(1C)   | 109.5      |
| O(1)-C(2)-C(3)     | 124.83(16) |
| O(1)-C(2)-C(7)     | 116.10(15) |
| C(3)-C(2)-C(7)     | 119.07(15) |
| C(2)-C(3)-H(3)     | 120.2      |
| C(2)-C(3)-C(4)     | 119.65(16) |
| C(4)-C(3)-H(3)     | 120.2      |
| C(3)-C(4)-H(4)     | 119.0      |
| C(5)-C(4)-C(3)     | 121.96(15) |
| C(5)-C(4)-H(4)     | 119.0      |
| C(4)-C(5)-C(6)     | 117.28(16) |
| C(4)-C(5)-C(8)     | 123.63(15) |
| C(6)-C(5)-C(8)     | 119.09(16) |
| C(5)-C(6)-H(6)     | 119.1      |
| C(7)-C(6)-C(5)     | 121.72(17) |
| C(7)-C(6)-H(6)     | 119.1      |
| C(2)-C(7)-H(7)     | 119.9      |
| C(6)-C(7)-C(2)     | 120.27(16) |
| C(6)-C(7)-H(7)     | 119.9      |
| C(5)-C(8)-H(8B)    | 108.1      |
| C(5)-C(8)-H(8A)    | 108.1      |
| C(5)-C(8)-C(9)     | 116.63(14) |
| H(8B)-C(8)-H(8A)   | 107.3      |
| C(9)-C(8)-H(8B)    | 108.1      |
| C(9)-C(8)-H(8A)    | 108.1      |
| C(8)-C(9)-H(9)     | 107.5      |
| C(10)-C(9)-C(8)    | 112.19(14) |
| C(10)-C(9)-H(9)    | 107.5      |
| C(10)-C(9)-C(13)   | 102.83(13) |
| C(13)-C(9)-C(8)    | 118.64(14) |
| C(13)-C(9)-H(9)    | 107.5      |
| O(2)-C(10)-C(9)    | 124.77(15) |
| O(2)-C(10)-C(11)   | 126.05(16) |
| C(11)-C(10)-C(9)   | 109.18(14) |
| C(10)-C(11)-H(11A) | 110.9      |
| C(10)-C(11)-H(11B) | 110.9      |

---

|                     |            |
|---------------------|------------|
| C(10)-C(11)-C(12)   | 104.20(14) |
| H(11A)-C(11)-H(11B) | 108.9      |
| C(12)-C(11)-H(11A)  | 110.9      |
| C(12)-C(11)-H(11B)  | 110.9      |
| C(11)-C(12)-H(12)   | 107.5      |
| C(11)-C(12)-C(13)   | 101.89(14) |
| C(13)-C(12)-H(12)   | 107.5      |
| C(14)-C(12)-C(11)   | 118.12(14) |
| C(14)-C(12)-H(12)   | 107.5      |
| C(14)-C(12)-C(13)   | 113.77(14) |
| C(9)-C(13)-C(12)    | 103.72(13) |
| C(9)-C(13)-H(13A)   | 111.0      |
| C(9)-C(13)-H(13B)   | 111.0      |
| C(12)-C(13)-H(13A)  | 111.0      |
| C(12)-C(13)-H(13B)  | 111.0      |
| H(13A)-C(13)-H(13B) | 109.0      |
| C(15)-C(14)-C(12)   | 118.86(15) |
| C(19)-C(14)-C(12)   | 122.94(15) |
| C(19)-C(14)-C(15)   | 118.17(17) |
| C(14)-C(15)-H(15)   | 119.4      |
| C(16)-C(15)-C(14)   | 121.13(18) |
| C(16)-C(15)-H(15)   | 119.4      |
| C(15)-C(16)-H(16)   | 119.9      |
| C(17)-C(16)-C(15)   | 120.15(19) |
| C(17)-C(16)-H(16)   | 119.9      |
| C(16)-C(17)-H(17)   | 120.3      |
| C(18)-C(17)-C(16)   | 119.39(18) |
| C(18)-C(17)-H(17)   | 120.3      |
| C(17)-C(18)-H(18)   | 119.7      |
| C(17)-C(18)-C(19)   | 120.57(18) |
| C(19)-C(18)-H(18)   | 119.7      |
| C(14)-C(19)-C(18)   | 120.59(18) |
| C(14)-C(19)-H(19)   | 119.7      |
| C(18)-C(19)-H(19)   | 119.7      |

---

Symmetry transformations used to generate equivalent atoms:

Table S9. Anisotropic displacement parameters ( $\text{\AA}^2 \times 10^3$ ) for UCIDong\_16b\_0m\_a. The anisotropic displacement factor exponent takes the form:  $-2\pi^2 [ h^2 a^*2U^{11} + \dots + 2 h k a^* b^* U^{12} ]$

|       | U <sup>11</sup> | U <sup>22</sup> | U <sup>33</sup> | U <sup>23</sup> | U <sup>13</sup> | U <sup>12</sup> |
|-------|-----------------|-----------------|-----------------|-----------------|-----------------|-----------------|
| O(1)  | 37(1)           | 32(1)           | 20(1)           | 1(1)            | -2(1)           | -1(1)           |
| O(2)  | 32(1)           | 22(1)           | 32(1)           | -4(1)           | 3(1)            | 0(1)            |
| C(1)  | 44(1)           | 33(1)           | 24(1)           | 2(1)            | 1(1)            | -2(1)           |
| C(2)  | 24(1)           | 30(1)           | 21(1)           | 0(1)            | 2(1)            | 5(1)            |
| C(3)  | 26(1)           | 25(1)           | 25(1)           | -2(1)           | 0(1)            | -2(1)           |
| C(4)  | 26(1)           | 29(1)           | 22(1)           | -3(1)           | -2(1)           | -2(1)           |
| C(5)  | 21(1)           | 27(1)           | 23(1)           | -2(1)           | 0(1)            | 1(1)            |
| C(6)  | 28(1)           | 26(1)           | 26(1)           | -3(1)           | 0(1)            | -3(1)           |
| C(7)  | 31(1)           | 32(1)           | 23(1)           | -5(1)           | -4(1)           | -2(1)           |
| C(8)  | 25(1)           | 26(1)           | 25(1)           | 0(1)            | -1(1)           | -3(1)           |
| C(9)  | 23(1)           | 24(1)           | 23(1)           | 0(1)            | 1(1)            | -1(1)           |
| C(10) | 19(1)           | 25(1)           | 27(1)           | 0(1)            | 5(1)            | 0(1)            |
| C(11) | 30(1)           | 24(1)           | 25(1)           | 3(1)            | 1(1)            | 2(1)            |
| C(12) | 23(1)           | 25(1)           | 22(1)           | 1(1)            | 1(1)            | -1(1)           |
| C(13) | 28(1)           | 23(1)           | 25(1)           | -1(1)           | -1(1)           | 1(1)            |
| C(14) | 23(1)           | 26(1)           | 24(1)           | 1(1)            | -3(1)           | 4(1)            |
| C(15) | 37(1)           | 28(1)           | 28(1)           | 3(1)            | -1(1)           | 0(1)            |
| C(16) | 44(1)           | 29(1)           | 36(1)           | -5(1)           | -5(1)           | -1(1)           |
| C(17) | 38(1)           | 41(1)           | 30(1)           | -11(1)          | -6(1)           | 9(1)            |
| C(18) | 34(1)           | 51(1)           | 24(1)           | -3(1)           | 4(1)            | 5(1)            |
| C(19) | 28(1)           | 38(1)           | 26(1)           | -1(1)           | 0(1)            | -4(1)           |

Table S10. Hydrogen coordinates ( $\times 10^4$ ) and isotropic displacement parameters ( $\text{\AA}^2 \times 10^3$ ) for UCIDong\_16b\_0m\_a.

|       | x    | y     | z    | U(eq) |
|-------|------|-------|------|-------|
| H(1A) | 1155 | 10438 | 344  | 50    |
| H(1B) | 2588 | 9766  | 1118 | 50    |
| H(1C) | 840  | 10746 | 1454 | 50    |
| H(3)  | 2037 | 9034  | 2691 | 31    |
| H(4)  | 2209 | 7129  | 4073 | 31    |
| H(6)  | -454 | 2796  | 2741 | 32    |

|        |      |      |      |    |
|--------|------|------|------|----|
| H(7)   | -639 | 4656 | 1362 | 34 |
| H(8B)  | 1007 | 2040 | 4206 | 30 |
| H(8A)  | 56   | 3668 | 4812 | 30 |
| H(9)   | 3663 | 3985 | 4650 | 28 |
| H(11A) | 4824 | 1502 | 6775 | 32 |
| H(11B) | 2867 | 1910 | 7058 | 32 |
| H(12)  | 5228 | 4648 | 6269 | 28 |
| H(13A) | 1545 | 5194 | 6176 | 30 |
| H(13B) | 2937 | 6496 | 5631 | 30 |
| H(15)  | 5809 | 7654 | 7066 | 37 |
| H(16)  | 5904 | 9493 | 8465 | 44 |
| H(17)  | 4319 | 8506 | 9768 | 44 |
| H(18)  | 2636 | 5677 | 9656 | 43 |
| H(19)  | 2549 | 3813 | 8261 | 37 |

*X-ray Crystallographic Data for 10 (CCDC 1869121)*

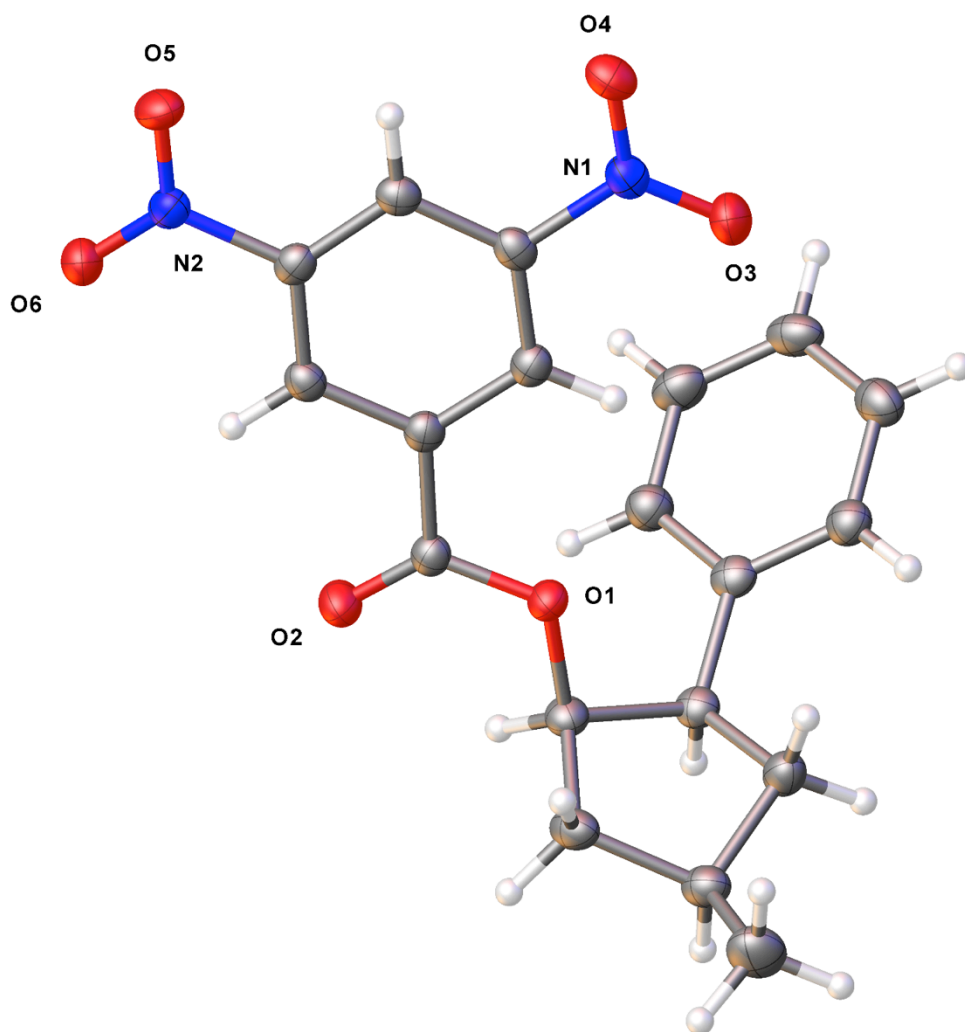

The single crystal X-ray diffraction studies were carried out on a Bruker Kappa APEX-II CCD diffractometer equipped with Cu K $\alpha$  radiation ( $\lambda = 1.5478$ ). Crystals of the subject compound were grown by dissolving approximately 1mg of sample in 350 $\mu$ L of Dichloromethane, which was then vapor diffused with Pentane over 2 days. A 0.357 x 0.046 x 0.023 mm piece of a colorless needle was mounted on a Cryoloop with Paratone oil. Data were collected in a nitrogen gas stream at 100(2) K using  $\omega$  and  $\nu$  scans. Crystal-to-detector distance was 40 mm using variable exposure time (5s-20s) depending on  $q$  with a scan width of 2.0°. Data collection was 99.5% complete to 68.00° in  $q$ . A total of 25579 reflections were collected covering the indices,  $-12 \leq h \leq 12$ ,  $-5 \leq k \leq 6$ ,  $-19 \leq l \leq 19$ . 3089 reflections were found to be symmetry independent, with a  $R_{int}$  of 0.0376. Indexing and unit cell refinement indicated a primitive, monoclinic lattice. The space group was found to be  $P2_1$ . The data were integrated using the Bruker SAINT software program and scaled using the SADABS software program. Solution by direct methods (SHELXT) produced a complete phasing model consistent with the proposed structure. All nonhydrogen atoms were refined anisotropically by full-matrix least-squares (SHELXL-2014). All hydrogen atoms were placed using a riding model. Their positions were constrained relative to their parent atom using the appropriate HFIX command in SHELXL-2014. The absolute stereochemistry of the molecule was established by anomalous dispersion using the Parson's method with a Flack parameter of 0.010(52). Crystallographic data are summarized in Table S11.

Table S11. Crystal data and structure refinement for UCI\_Dong\_ZC-11-16a.

|                        |                                                               |                                |
|------------------------|---------------------------------------------------------------|--------------------------------|
| Report date            | 2018-06-14                                                    |                                |
| Identification code    | ZC-11-16a                                                     |                                |
| Empirical formula      | C <sub>19</sub> H <sub>18</sub> N <sub>2</sub> O <sub>6</sub> |                                |
| Molecular formula      | C <sub>19</sub> H <sub>18</sub> N <sub>2</sub> O <sub>6</sub> |                                |
| Formula weight         | 370.35                                                        |                                |
| Temperature            | 100.0 K                                                       |                                |
| Wavelength             | 1.54178 Å                                                     |                                |
| Crystal system         | Monoclinic                                                    |                                |
| Space group            | P 1 21 1                                                      |                                |
| Unit cell dimensions   | $a = 10.1670(3)$ Å                                            | $\alpha = 90^\circ$ .          |
|                        | $b = 5.5064(2)$ Å                                             | $\beta = 104.9590(10)^\circ$ . |
|                        | $c = 16.0224(5)$ Å                                            | $\gamma = 90^\circ$ .          |
| Volume                 | $866.59(5)$ Å <sup>3</sup>                                    |                                |
| Z                      | 2                                                             |                                |
| Density (calculated)   | 1.419 Mg/m <sup>3</sup>                                       |                                |
| Absorption coefficient | 0.898 mm <sup>-1</sup>                                        |                                |
| F(000)                 | 388                                                           |                                |

|                                   |                                             |
|-----------------------------------|---------------------------------------------|
| Crystal size                      | 0.357 x 0.046 x 0.023 mm <sup>3</sup>       |
| Crystal color, habit              | Colorless Needle                            |
| Theta range for data collection   | 2.855 to 68.272°.                           |
| Index ranges                      | -12<=h<=12, -5<=k<=6, -19<=l<=19            |
| Reflections collected             | 25579                                       |
| Independent reflections           | 3089 [R(int) = 0.0376, R(sigma) = 0.0204]   |
| Completeness to theta = 68.000°   | 99.5 %                                      |
| Absorption correction             | Semi-empirical from equivalents             |
| Max. and min. transmission        | 0.3200 and 0.2206                           |
| Refinement method                 | Full-matrix least-squares on F <sup>2</sup> |
| Data / restraints / parameters    | 3089 / 1 / 245                              |
| Goodness-of-fit on F <sup>2</sup> | 1.050                                       |
| Final R indices [I>2sigma(I)]     | R1 = 0.0246, wR2 = 0.0649                   |
| R indices (all data)              | R1 = 0.0251, wR2 = 0.0654                   |
| Absolute structure parameter      | 0.01(5)                                     |
| Extinction coefficient            | n/a                                         |
| Largest diff. peak and hole       | 0.131 and -0.141 e.Å <sup>-3</sup>          |

Table S12. Atomic coordinates ( x 10<sup>4</sup>) and equivalent isotropic displacement parameters (Å<sup>2</sup>x 10<sup>3</sup>) for UCI\_Dong\_ZC-11-16a. U(eq) is defined as one third of the trace of the orthogonalized U<sup>ij</sup> tensor.

|      | x       | y       | z       | U(eq) |
|------|---------|---------|---------|-------|
| O(1) | 2372(1) | 3438(2) | 7378(1) | 22(1) |
| O(2) | 1314(1) | 261(3)  | 6598(1) | 29(1) |
| O(3) | 4531(1) | 9475(2) | 5962(1) | 32(1) |
| O(4) | 3988(1) | 9739(2) | 4567(1) | 29(1) |

---

|       |         |         |         |       |
|-------|---------|---------|---------|-------|
| O(5)  | 1174(1) | 3543(3) | 2846(1) | 30(1) |
| O(6)  | 566(1)  | 463(3)  | 3500(1) | 29(1) |
| N(1)  | 3921(1) | 8765(3) | 5244(1) | 24(1) |
| N(2)  | 1080(1) | 2469(3) | 3497(1) | 23(1) |
| C(1)  | 2327(2) | 2226(3) | 8184(1) | 23(1) |
| C(2)  | 1143(2) | 3249(4) | 8510(1) | 27(1) |
| C(3)  | 1780(2) | 4412(4) | 9392(1) | 27(1) |
| C(4)  | 3204(2) | 5122(4) | 9323(1) | 27(1) |
| C(5)  | 3635(2) | 2929(3) | 8874(1) | 22(1) |
| C(6)  | 4895(2) | 3171(3) | 8540(1) | 24(1) |
| C(7)  | 5231(2) | 1316(4) | 8041(1) | 28(1) |
| C(8)  | 6378(2) | 1473(4) | 7728(1) | 32(1) |
| C(9)  | 7217(2) | 3494(4) | 7908(1) | 32(1) |
| C(10) | 6900(2) | 5347(4) | 8403(1) | 32(1) |
| C(11) | 5746(2) | 5183(4) | 8719(1) | 27(1) |
| C(12) | 960(2)  | 6497(5) | 9617(2) | 40(1) |
| C(13) | 1853(2) | 2217(3) | 6649(1) | 21(1) |
| C(14) | 2050(2) | 3547(3) | 5874(1) | 21(1) |
| C(15) | 2866(2) | 5603(3) | 5939(1) | 22(1) |
| C(16) | 3038(2) | 6624(3) | 5184(1) | 22(1) |
| C(17) | 2440(2) | 5701(3) | 4371(1) | 22(1) |
| C(18) | 1654(2) | 3641(3) | 4339(1) | 22(1) |
| C(19) | 1440(2) | 2552(3) | 5069(1) | 22(1) |

---



Table S13. Bond lengths [Å] and angles [°] for UCI\_Dong\_ZC-11-16a.

|                 |            |                   |            |
|-----------------|------------|-------------------|------------|
| O(1)-C(1)       | 1.4655(19) | C(4)-C(5)         | 1.526(3)   |
| O(1)-C(13)      | 1.333(2)   | C(5)-C(6)         | 1.517(2)   |
| O(2)-C(13)      | 1.202(2)   | C(6)-C(7)         | 1.393(3)   |
| O(3)-N(1)       | 1.2223(19) | C(6)-C(11)        | 1.389(3)   |
| O(4)-N(1)       | 1.2277(19) | C(7)-C(8)         | 1.386(3)   |
| O(5)-N(2)       | 1.2252(19) | C(8)-C(9)         | 1.387(3)   |
| O(6)-N(2)       | 1.223(2)   | C(9)-C(10)        | 1.380(3)   |
| N(1)-C(16)      | 1.470(2)   | C(10)-C(11)       | 1.395(2)   |
| N(2)-C(18)      | 1.472(2)   | C(13)-C(14)       | 1.499(2)   |
| C(1)-C(2)       | 1.537(2)   | C(14)-C(15)       | 1.391(3)   |
| C(1)-C(5)       | 1.544(2)   | C(14)-C(19)       | 1.391(2)   |
| C(2)-C(3)       | 1.535(2)   | C(15)-C(16)       | 1.385(2)   |
| C(3)-C(4)       | 1.532(2)   | C(16)-C(17)       | 1.384(2)   |
| C(3)-C(12)      | 1.516(3)   | C(17)-C(18)       | 1.381(3)   |
| C(18)-C(19)     | 1.381(2)   | C(10)-C(9)-C(8)   | 119.39(17) |
|                 |            | C(9)-C(10)-C(11)  | 120.23(19) |
| C(13)-O(1)-C(1) | 116.58(14) | C(6)-C(11)-C(10)  | 120.93(18) |
| O(3)-N(1)-O(4)  | 124.18(15) | O(1)-C(13)-C(14)  | 111.86(14) |
| O(3)-N(1)-C(16) | 118.09(14) | O(2)-C(13)-O(1)   | 125.55(16) |
| O(4)-N(1)-C(16) | 117.74(14) | O(2)-C(13)-C(14)  | 122.57(15) |
| O(5)-N(2)-C(18) | 118.00(15) | C(15)-C(14)-C(13) | 122.67(14) |
| O(6)-N(2)-O(5)  | 124.47(15) | C(15)-C(14)-C(19) | 120.35(15) |
| O(6)-N(2)-C(18) | 117.52(14) | C(19)-C(14)-C(13) | 116.87(15) |
| O(1)-C(1)-C(2)  | 109.75(14) | C(16)-C(15)-C(14) | 118.14(15) |
| O(1)-C(1)-C(5)  | 107.44(13) | C(15)-C(16)-N(1)  | 118.77(15) |
| C(2)-C(1)-C(5)  | 105.66(14) | C(17)-C(16)-N(1)  | 117.91(15) |

|                 |            |                   |            |
|-----------------|------------|-------------------|------------|
| C(3)-C(2)-C(1)  | 106.56(13) | C(17)-C(16)-C(15) | 123.30(16) |
| C(4)-C(3)-C(2)  | 102.78(13) | C(18)-C(17)-C(16) | 116.50(15) |
| C(12)-C(3)-C(2) | 114.05(15) | C(17)-C(18)-N(2)  | 118.89(14) |
| C(12)-C(3)-C(4) | 114.36(17) | C(17)-C(18)-C(19) | 122.76(15) |
| C(5)-C(4)-C(3)  | 102.93(15) | C(19)-C(18)-N(2)  | 118.26(15) |
| C(4)-C(5)-C(1)  | 103.71(13) | C(18)-C(19)-C(14) | 118.93(16) |
| C(6)-C(5)-C(1)  | 114.80(13) |                   |            |
| C(6)-C(5)-C(4)  | 117.89(15) |                   |            |
| C(7)-C(6)-C(5)  | 119.54(16) |                   |            |
| C(11)-C(6)-C(5) | 122.37(16) |                   |            |
| C(11)-C(6)-C(7) | 118.09(16) |                   |            |
| C(8)-C(7)-C(6)  | 121.08(18) |                   |            |
| C(7)-C(8)-C(9)  | 120.27(18) |                   |            |

Table S14. Anisotropic displacement parameters ( $\text{\AA}^2 \times 10^3$ ) for UCI\_Dong\_ZC-11-16a. The anisotropic displacement factor exponent takes the form:  $-2\pi^2 [ h^2 a^{*2} U^{11} + \dots + 2 h k a^* b^* U^{12} ]$

|      | U <sup>11</sup> | U <sup>22</sup> | U <sup>33</sup> | U <sup>23</sup> | U <sup>13</sup> | U <sup>12</sup> |
|------|-----------------|-----------------|-----------------|-----------------|-----------------|-----------------|
| O(1) | 24(1)           | 24(1)           | 18(1)           | 0(1)            | 4(1)            | -3(1)           |
| O(2) | 34(1)           | 28(1)           | 25(1)           | -1(1)           | 7(1)            | -9(1)           |
| O(3) | 34(1)           | 31(1)           | 33(1)           | -7(1)           | 8(1)            | -9(1)           |
| O(4) | 28(1)           | 27(1)           | 34(1)           | 5(1)            | 11(1)           | -2(1)           |
| O(5) | 30(1)           | 41(1)           | 21(1)           | 1(1)            | 9(1)            | -5(1)           |
| O(6) | 29(1)           | 31(1)           | 27(1)           | -5(1)           | 7(1)            | -7(1)           |
| N(1) | 22(1)           | 22(1)           | 29(1)           | -1(1)           | 8(1)            | 0(1)            |
| N(2) | 20(1)           | 29(1)           | 22(1)           | -3(1)           | 6(1)            | -1(1)           |
| C(1) | 25(1)           | 24(1)           | 20(1)           | 3(1)            | 5(1)            | -1(1)           |

---

|       |       |       |       |       |       |       |
|-------|-------|-------|-------|-------|-------|-------|
| C(2)  | 21(1) | 37(1) | 24(1) | 4(1)  | 6(1)  | -1(1) |
| C(3)  | 23(1) | 35(1) | 24(1) | 1(1)  | 8(1)  | 1(1)  |
| C(4)  | 23(1) | 34(1) | 25(1) | -6(1) | 6(1)  | -2(1) |
| C(5)  | 22(1) | 26(1) | 19(1) | 3(1)  | 4(1)  | 2(1)  |
| C(6)  | 22(1) | 29(1) | 19(1) | 3(1)  | 3(1)  | 3(1)  |
| C(7)  | 26(1) | 30(1) | 28(1) | -1(1) | 7(1)  | 1(1)  |
| C(8)  | 29(1) | 41(1) | 28(1) | -2(1) | 10(1) | 7(1)  |
| C(9)  | 23(1) | 48(1) | 28(1) | 5(1)  | 9(1)  | 4(1)  |
| C(10) | 25(1) | 39(1) | 30(1) | 2(1)  | 5(1)  | -4(1) |
| C(11) | 26(1) | 31(1) | 23(1) | -1(1) | 5(1)  | 0(1)  |
| C(12) | 32(1) | 44(1) | 48(1) | -5(1) | 19(1) | 2(1)  |
| C(13) | 18(1) | 23(1) | 21(1) | -2(1) | 4(1)  | 1(1)  |
| C(14) | 18(1) | 22(1) | 22(1) | -2(1) | 6(1)  | 2(1)  |
| C(15) | 19(1) | 24(1) | 22(1) | -2(1) | 4(1)  | 2(1)  |
| C(16) | 17(1) | 21(1) | 28(1) | 0(1)  | 7(1)  | 2(1)  |
| C(17) | 19(1) | 23(1) | 24(1) | 2(1)  | 7(1)  | 3(1)  |
| C(18) | 18(1) | 26(1) | 21(1) | -2(1) | 4(1)  | 3(1)  |
| C(19) | 18(1) | 23(1) | 25(1) | 0(1)  | 6(1)  | 0(1)  |

---

Table S15. Hydrogen coordinates ( $\times 10^4$ ) and isotropic displacement parameters ( $\text{\AA}^2 \times 10^3$ )

for UCI\_Dong\_ZC-11-16a.

|        | x    | y    | z     | U(eq) |
|--------|------|------|-------|-------|
| H(1)   | 2250 | 424  | 8107  | 28    |
| H(2A)  | 633  | 4477 | 8101  | 33    |
| H(2B)  | 510  | 1933 | 8568  | 33    |
| H(3)   | 1876 | 3134 | 9847  | 33    |
| H(4A)  | 3175 | 6614 | 8973  | 33    |
| H(4B)  | 3832 | 5382 | 9901  | 33    |
| H(5)   | 3821 | 1583 | 9308  | 27    |
| H(7)   | 4665 | -78  | 7913  | 34    |
| H(8)   | 6590 | 189  | 7388  | 39    |
| H(9)   | 8002 | 3604 | 7692  | 39    |
| H(10)  | 7469 | 6739 | 8529  | 38    |
| H(11)  | 5539 | 6466 | 9060  | 32    |
| H(12A) | 867  | 7777 | 9181  | 59    |
| H(12B) | 1428 | 7149 | 10185 | 59    |
| H(12C) | 55   | 5912 | 9630  | 59    |
| H(15)  | 3293 | 6287 | 6486  | 26    |
| H(17)  | 2565 | 6445 | 3862  | 26    |
| H(19)  | 884  | 1145 | 5022  | 26    |

## 11. References

- [1] D. C. Whitehead, R. Yousefi, A. Jaganathan, B. Borhan, *J. Am. Chem. Soc.* **2010**, *132*, 3298–3300.  
 [2] X.-Y. Qin, B.-Y. Chen, J.-J. Fu, L. Shan, X.-G. Lei, W.-D. Zhang, *Eur. J. Med. Chem.* **2015**, *102*, 256–265.  
 [3] H. V. Huynh, Y. X. Chew, *Inorg. Chim. Acta.* **2010**, *363*, 1979–1983.  
 [4] S. K. Scott, A. J. Grenning, *Angew. Chem. Int. Ed.* **2017**, *56*, 8125–8129.  
 [5] W. Yuan, R. J. Berman, M. H. Gelb, *J. Am. Chem. Soc.* **1987**, *109*, 8071–8081.  
 [6] F. Giacomina, A. Alexakis, *Eur. J. Org. Chem.* **2013**, 6710–6721.  
 [7] M. Frigerio, M. Santagostino, S. Sputore, *J. Org. Chem.* **1999**, *64*, 4537–4538.  
 [8] A. Faulkner, J. S. Scott, J. F. Bower, *J. Am. Chem. Soc.* **2015**, *137*, 7224–7230.  
 [9] M. Tanaka, M. Imai, M. Fujio, E. Sakamoto, M. Takahashi, Y. Eto-Kato, X. M. Wu, K. Funakoshi, K. Sakai, H. Suemune, *J. Org. Chem.* **2000**, *65*, 5806–5816.  
 [10] F. Bilodeau, L. Dubé, P. Deslongchamps, *Tetrahedron* **2003**, *59*, 2781–2791.

## 12. Ligand and Amine Combinations for Various Aldehydes

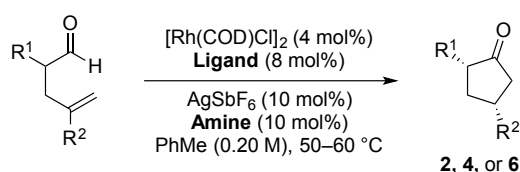

|                                                                                                                                             | <br>$\alpha$ -alkyl aldehyde<br>with alkyl olefin ( <b>1a</b> )                                                                                        | <br>$\alpha$ -alkyl aldehyde<br>with styrenyl olefin ( <b>3a</b> )                                                                                     | <br>$\alpha$ -aryl aldehyde<br>with alkyl olefin ( <b>5a</b> )                                                                                         |
|---------------------------------------------------------------------------------------------------------------------------------------------|--------------------------------------------------------------------------------------------------------------------------------------------------------|--------------------------------------------------------------------------------------------------------------------------------------------------------|--------------------------------------------------------------------------------------------------------------------------------------------------------|
| <br>(Ar = 3,5- <sup>t</sup> Bu <sub>2</sub> -4-OMePh)<br>DTBM-Segphos ( <b>L3</b> )/<br>1-AdNH <sub>2</sub> ( <b>A5</b> )                   | <div style="border: 1px solid black; padding: 5px; width: fit-content; margin: auto;"> <b>2a</b>, 94%<br/>&gt;20:1 <i>dr</i>, &gt;99% <i>ee</i> </div> | <b>4a</b> , <10%<br><i>dr</i> ND, <i>ee</i> ND                                                                                                         | <b>6a</b> , 24%<br>>20:1 <i>dr</i> , >99% <i>ee</i>                                                                                                    |
| <br>JoSPOphos ( <b>L4</b> )/<br>1-AdNH <sub>2</sub> ( <b>A5</b> )                                                                           | <b>2a</b> , 78%<br>>20:1 <i>dr</i> , >99% <i>ee</i>                                                                                                    | <div style="border: 1px solid black; padding: 5px; width: fit-content; margin: auto;"> <b>4a</b>, 76%<br/>&gt;20:1 <i>dr</i>, &gt;99% <i>ee</i> </div> | <b>6a</b> , 54%<br>10:1 <i>dr</i> , 87% <i>ee</i>                                                                                                      |
| <br>(Ar = 3,5- <sup>t</sup> Bu <sub>2</sub> -4-OMePh)<br>DTBM-Garphos ( <b>L5</b> )/<br>2,6-Et <sub>2</sub> PhNH <sub>2</sub> ( <b>A8</b> ) | <b>2a</b> , 83%<br>>20:1 <i>dr</i> , 93% <i>ee</i>                                                                                                     | <b>4a</b> , <10%<br><i>dr</i> ND, <i>ee</i> ND                                                                                                         | <div style="border: 1px solid black; padding: 5px; width: fit-content; margin: auto;"> <b>6a</b>, 87%<br/>&gt;20:1 <i>dr</i>, &gt;99% <i>ee</i> </div> |

Figure S1. Empirical Trend for Optimal Amine and Ligand.

## 13. NMR Spectra

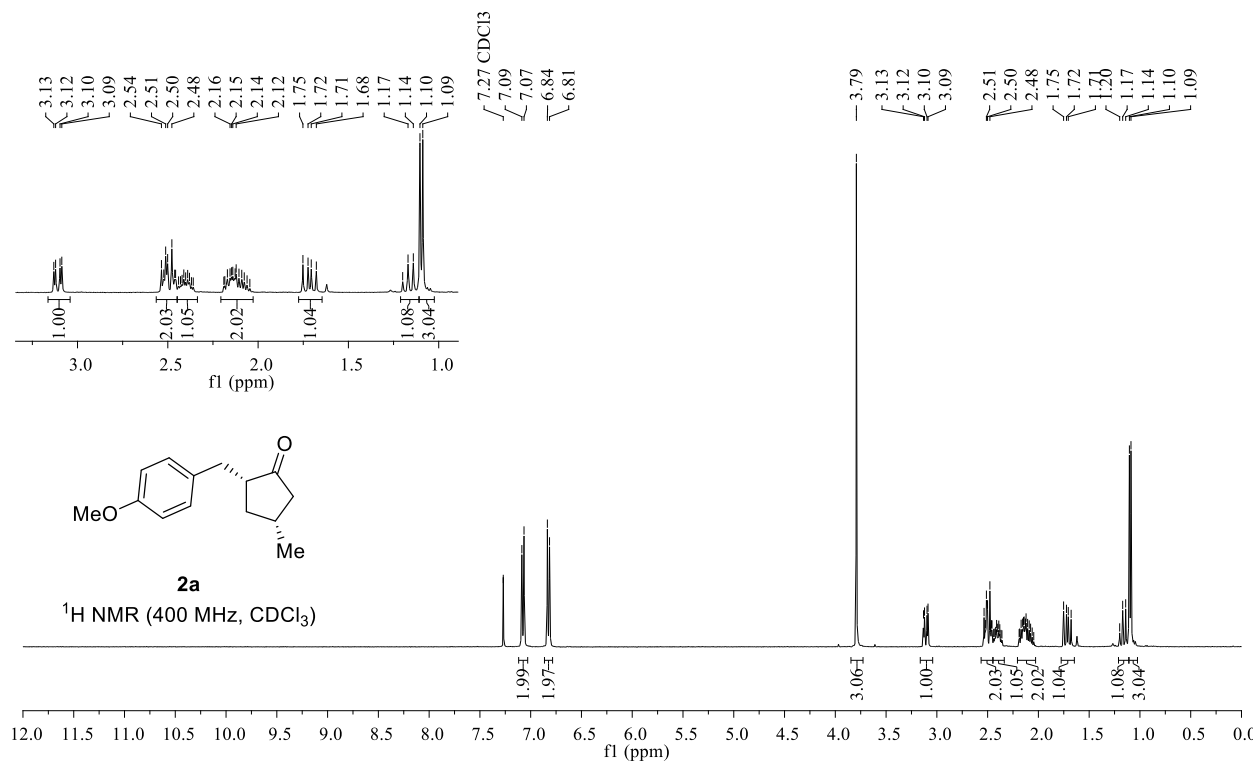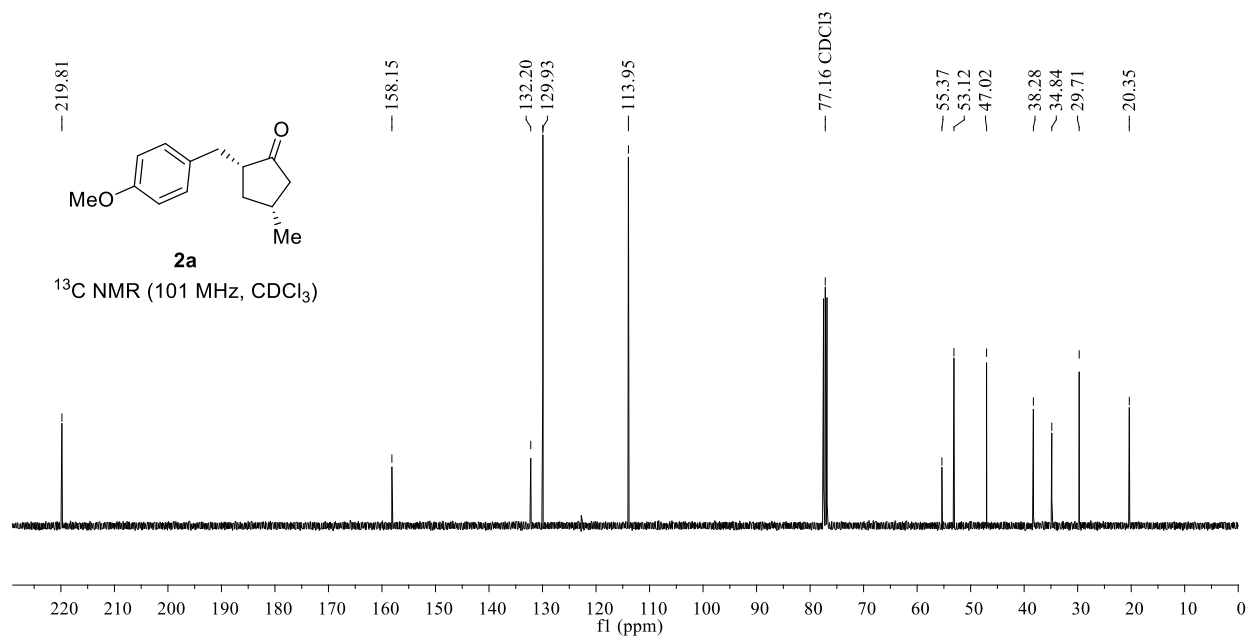

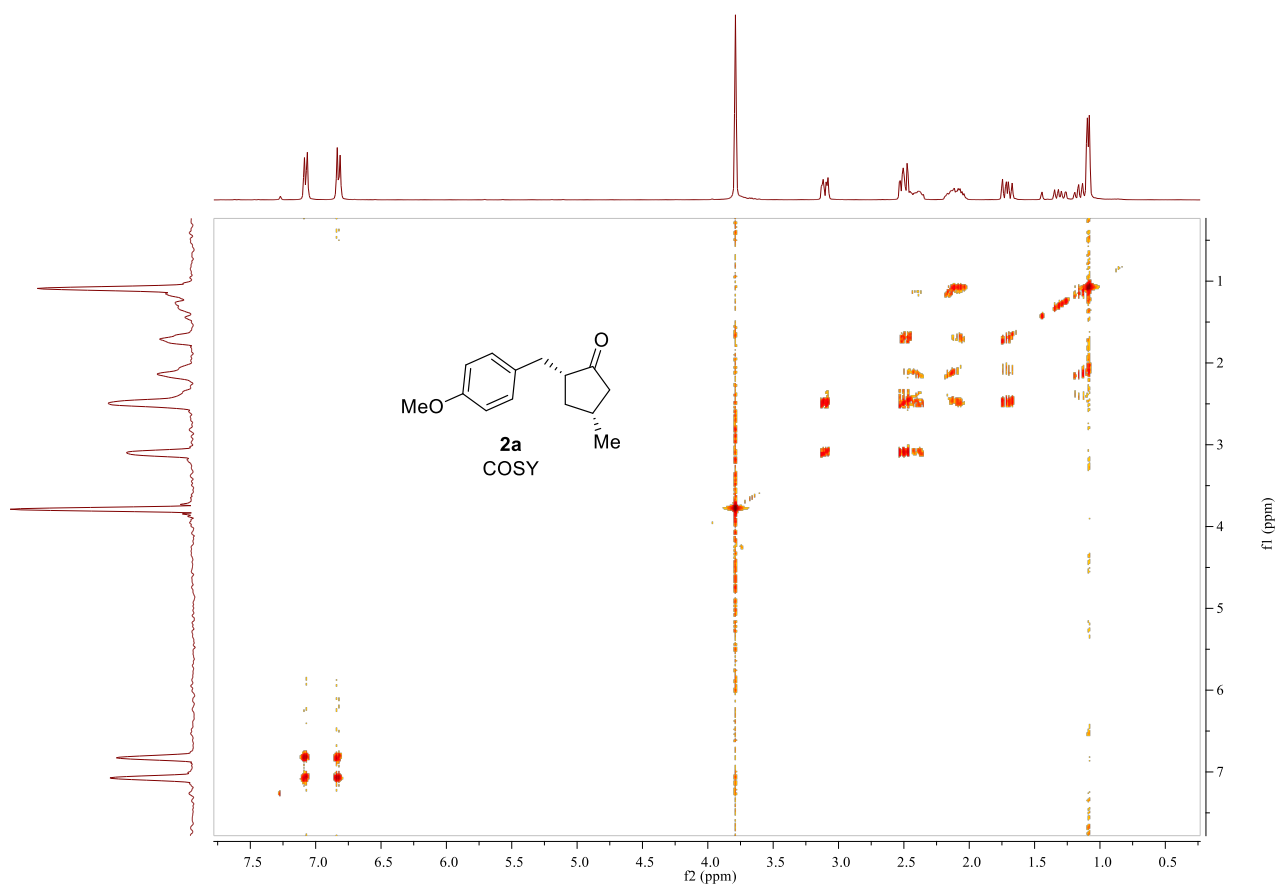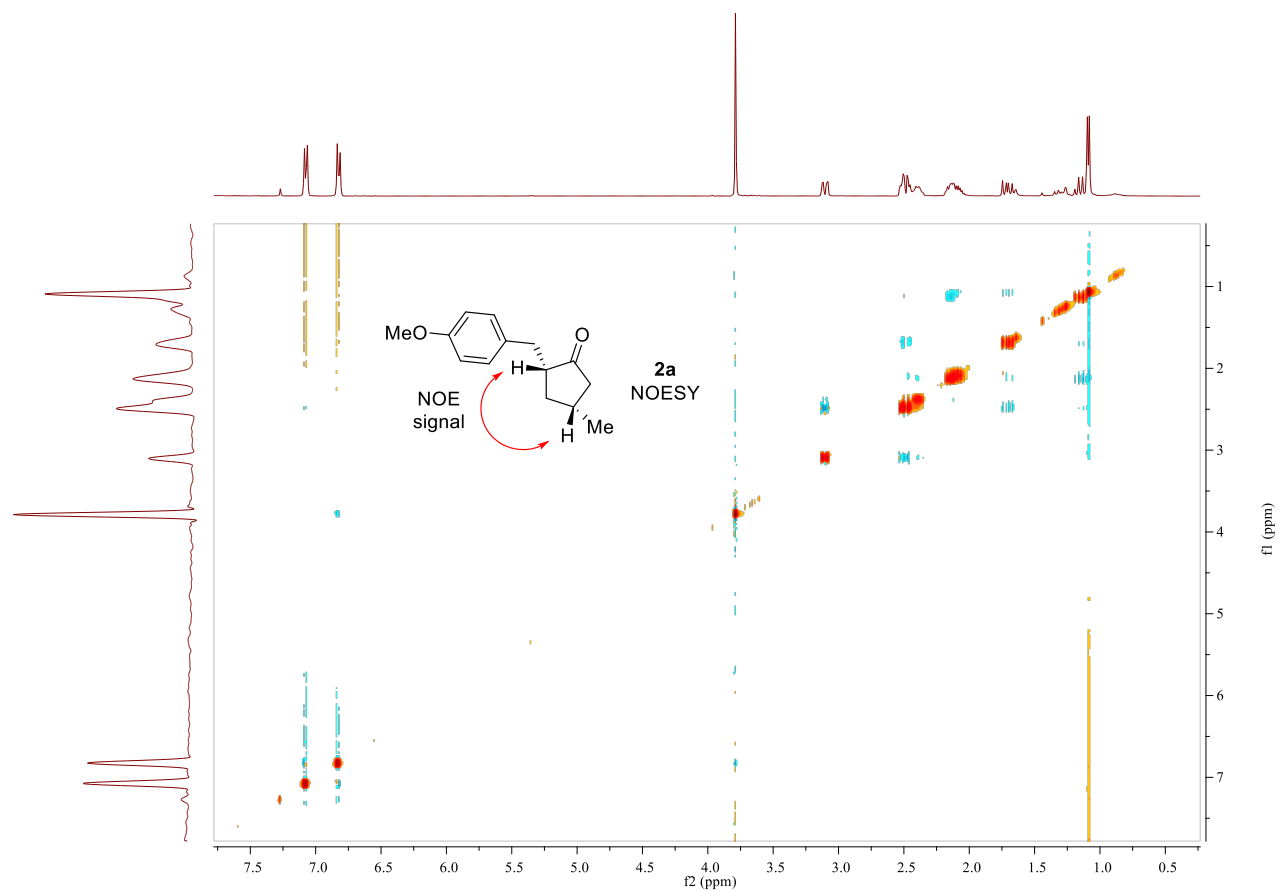

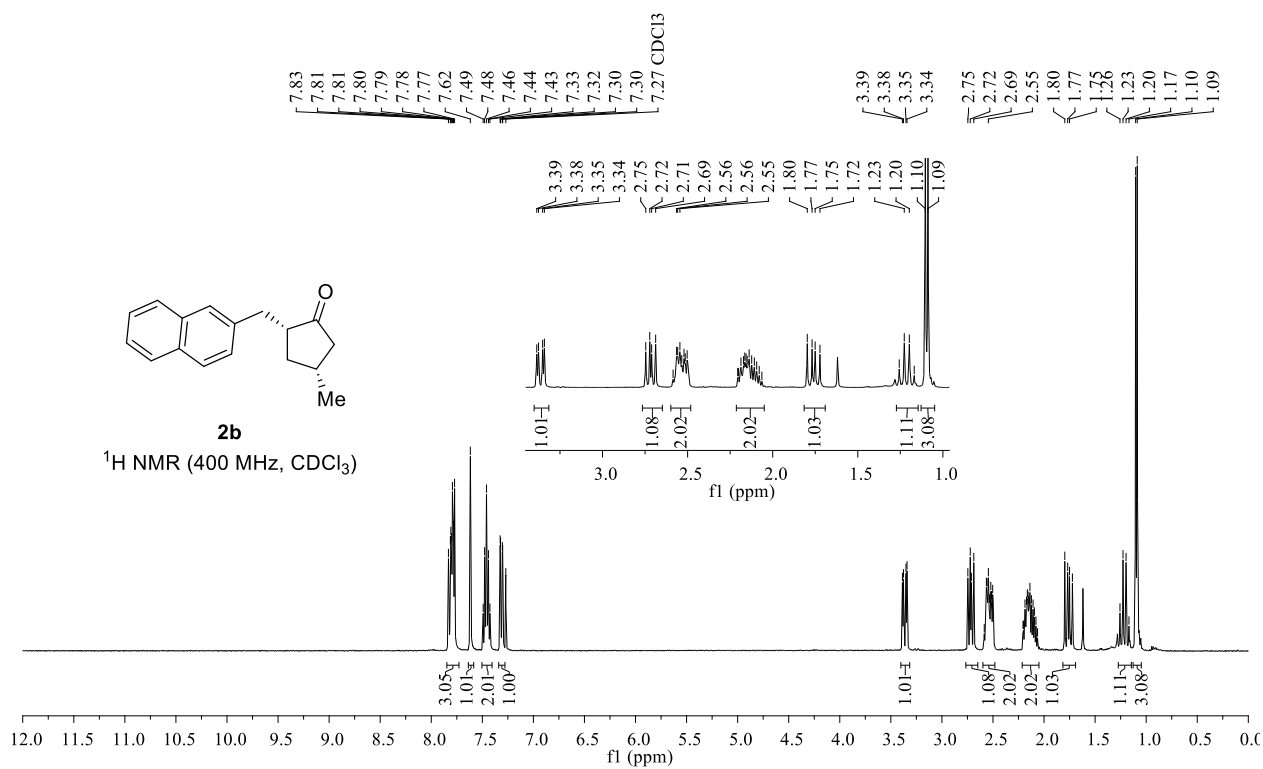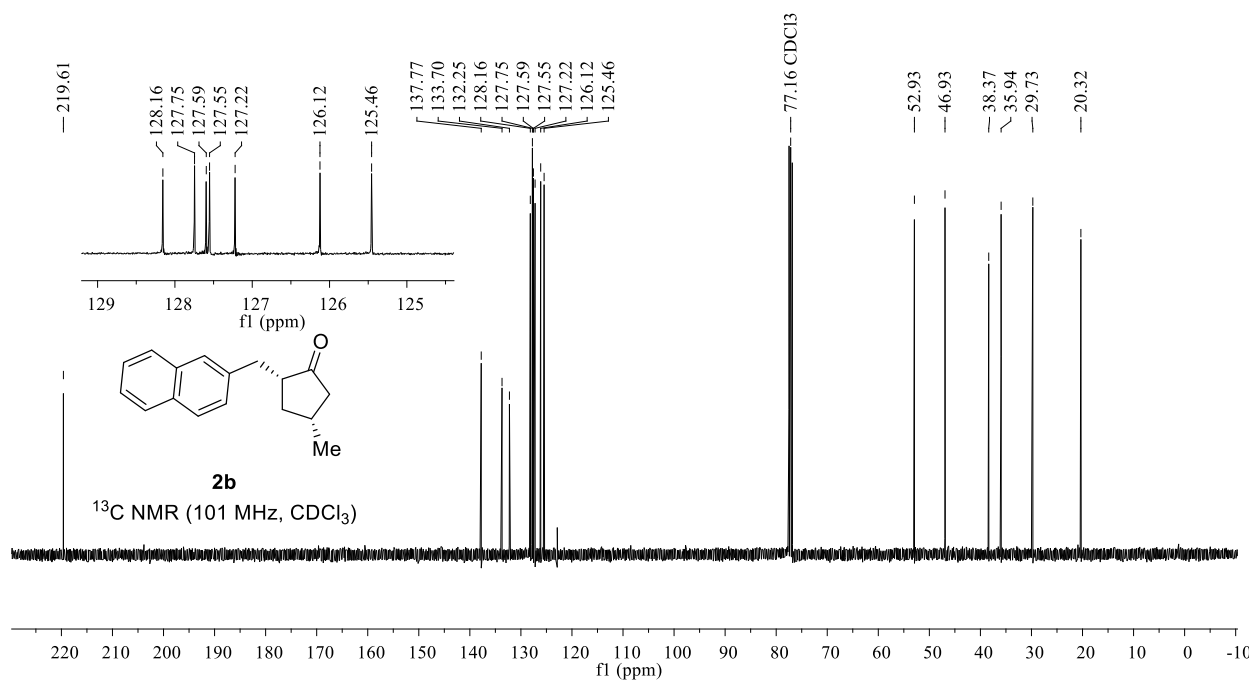



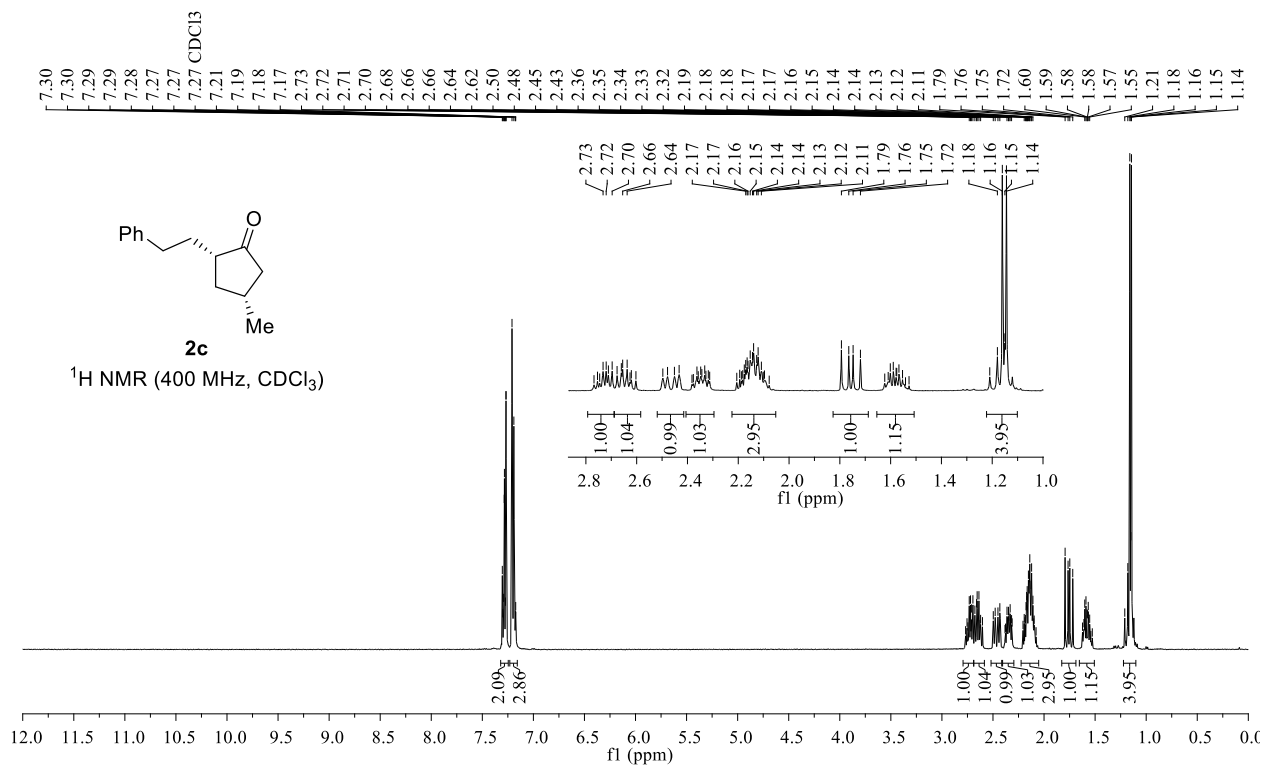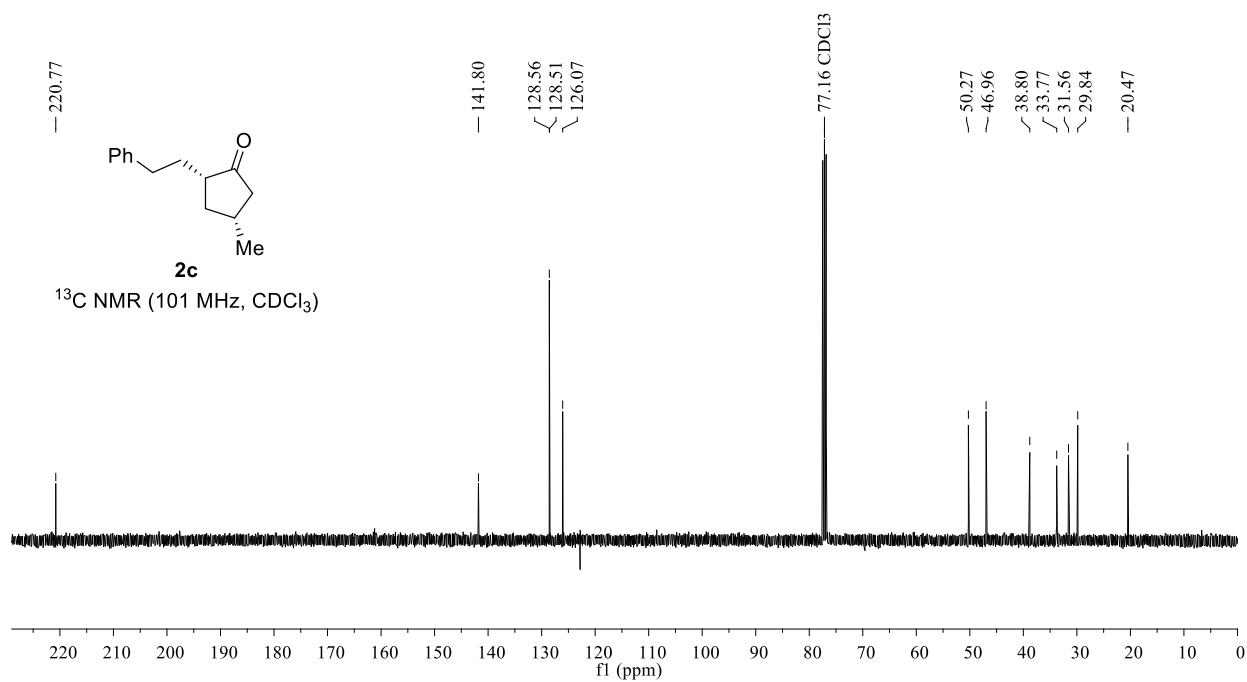

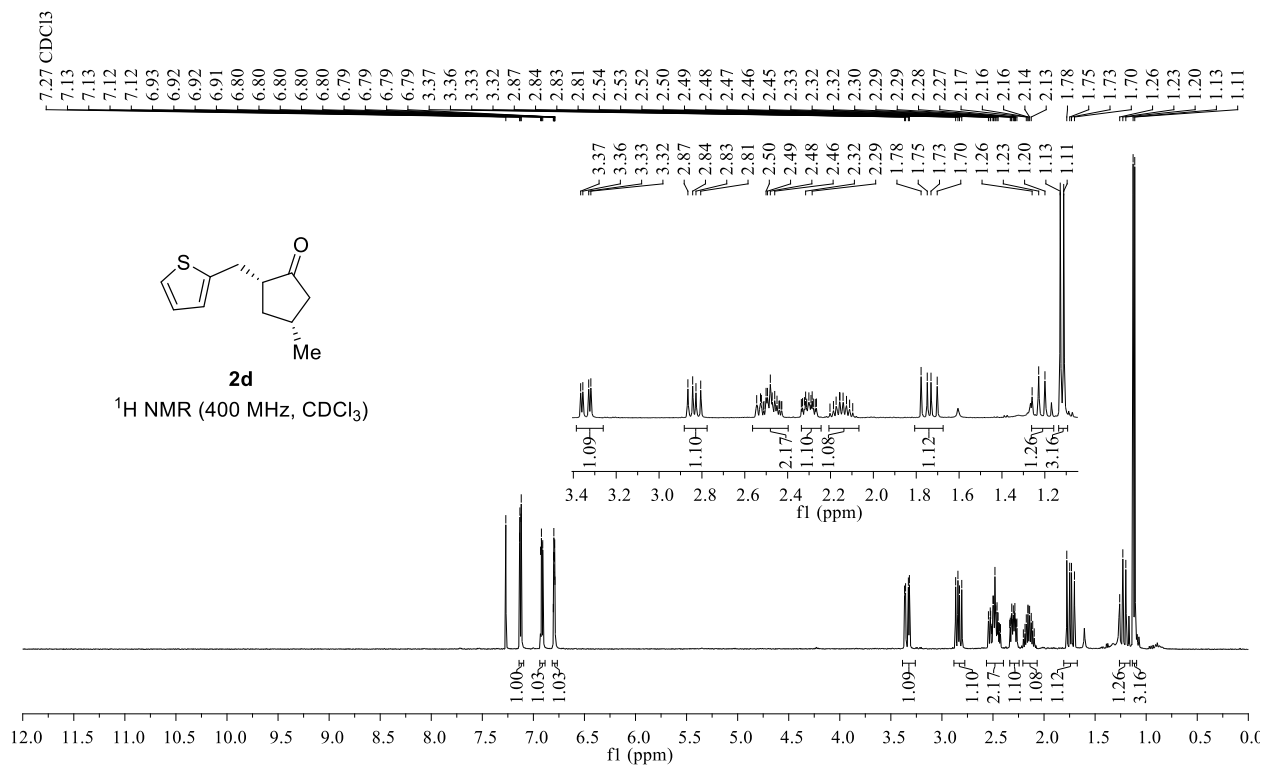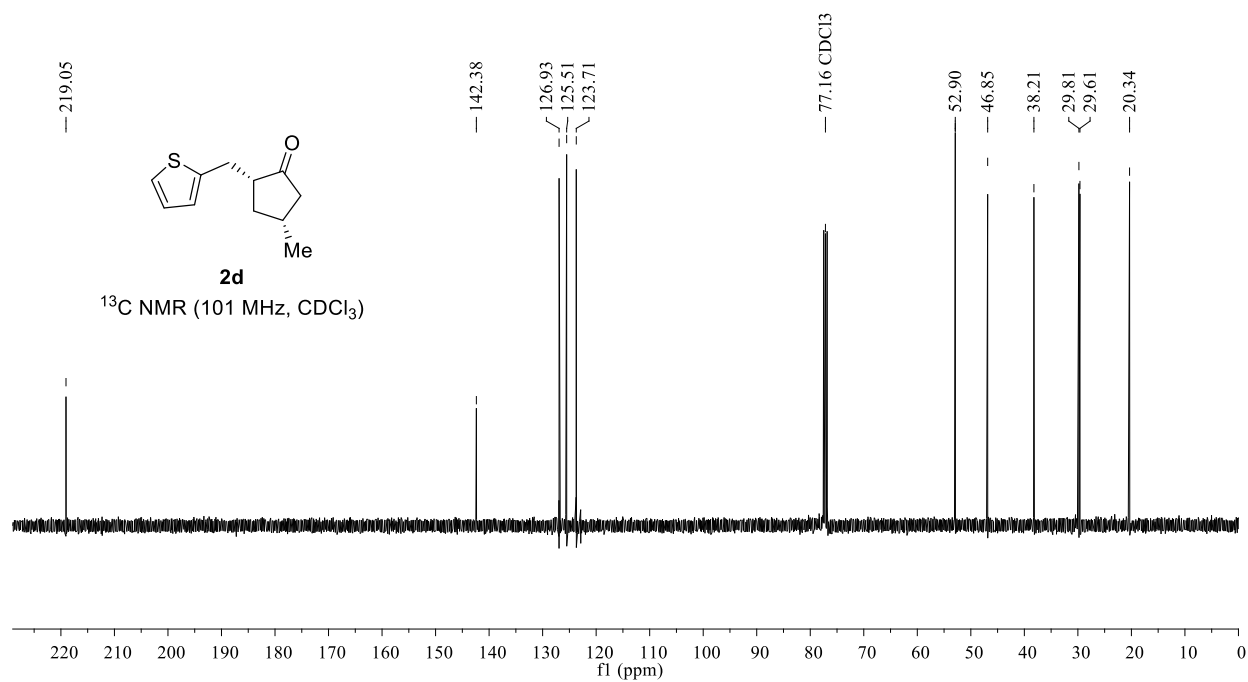

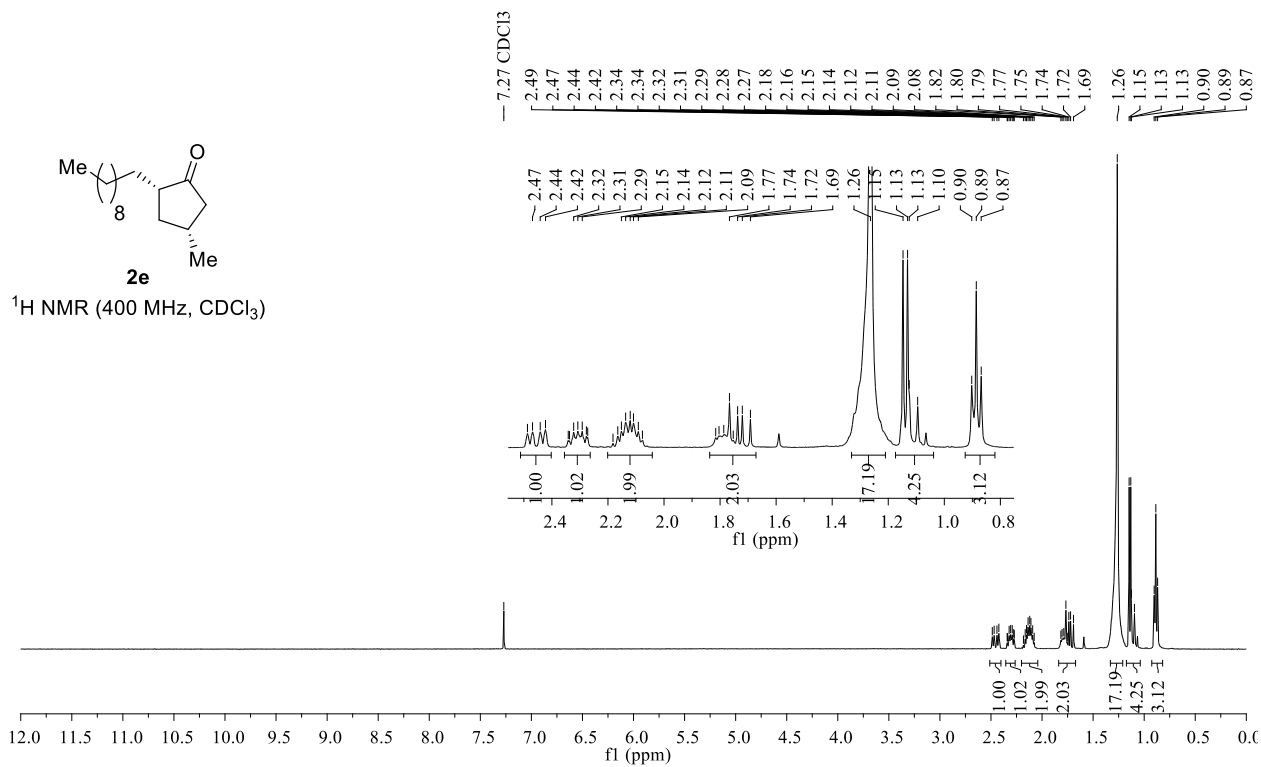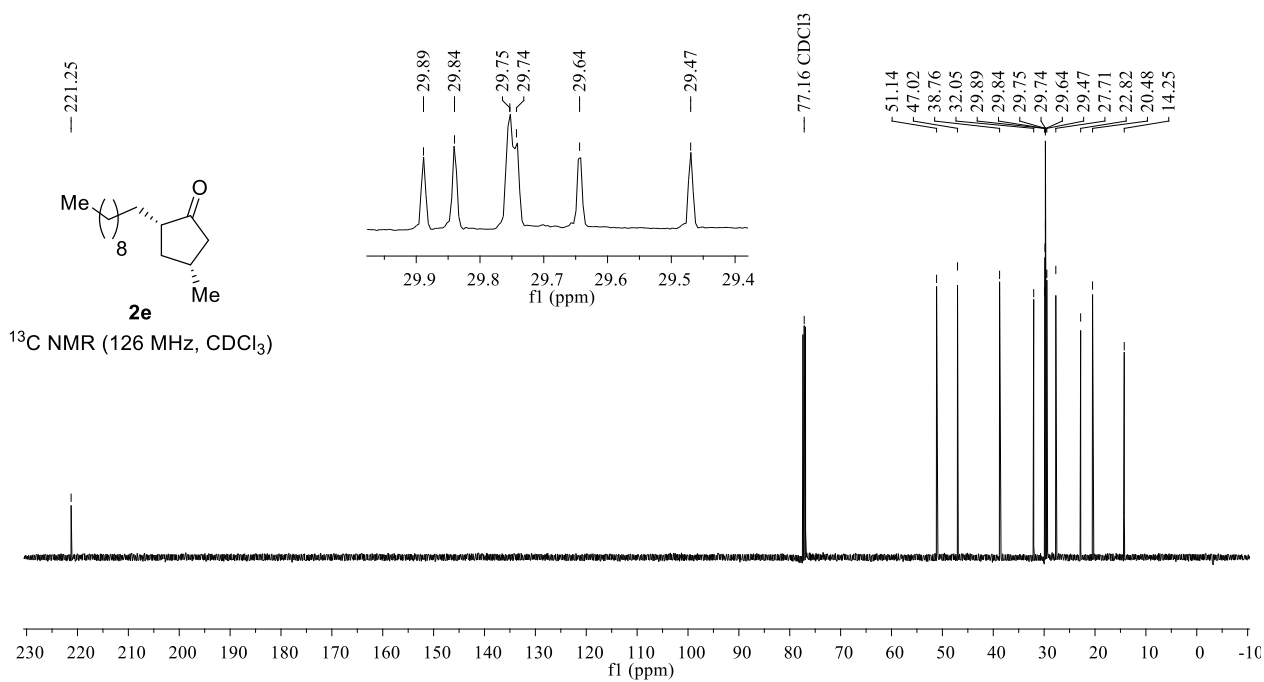

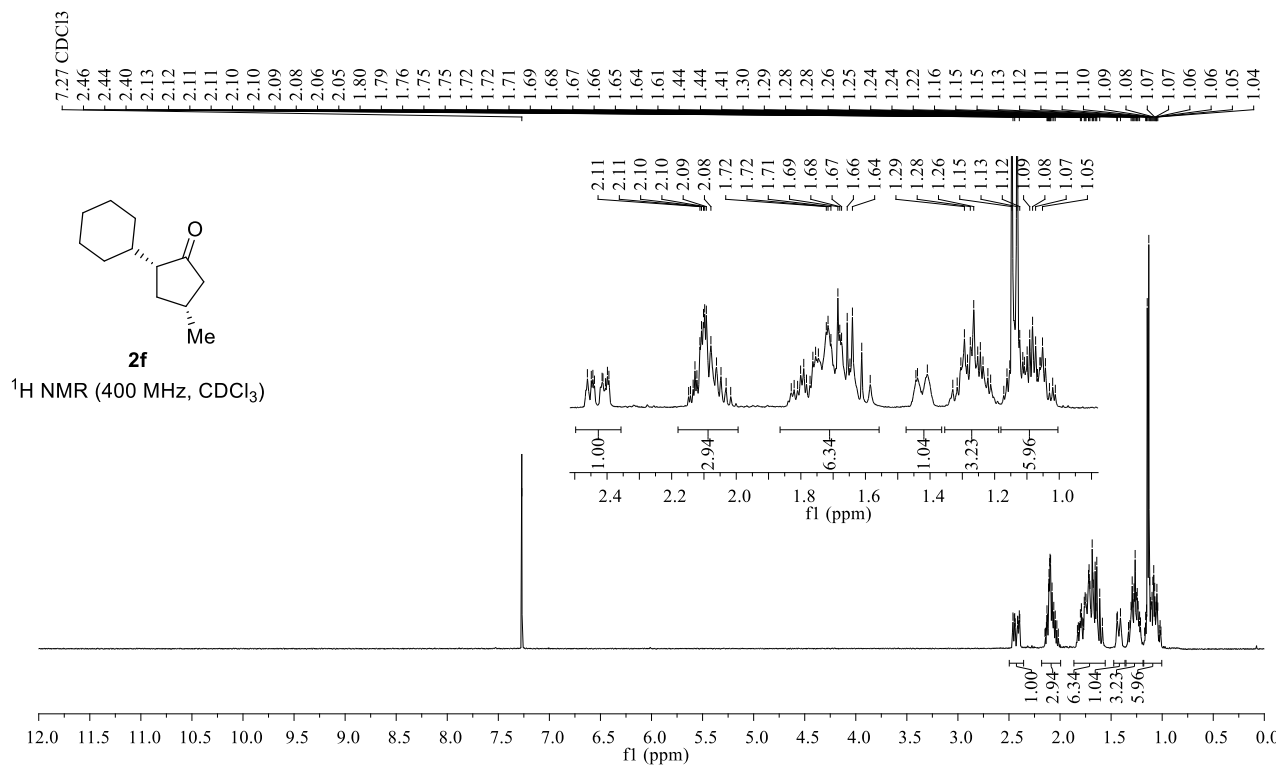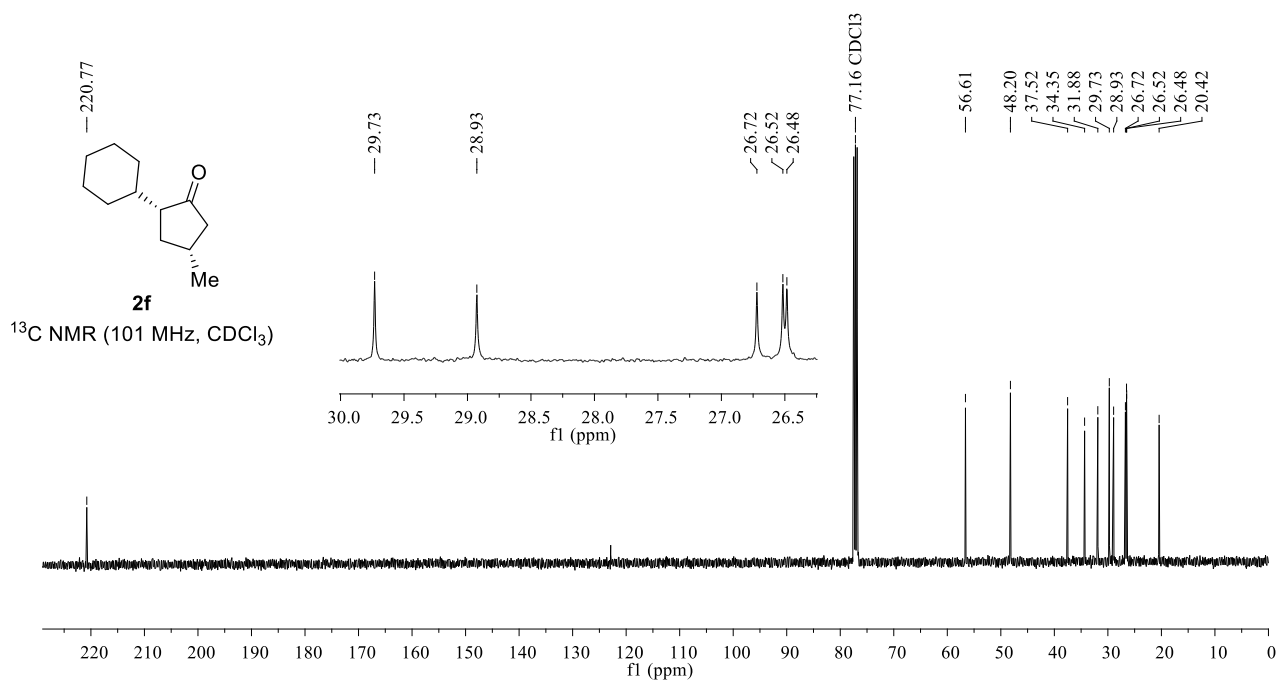

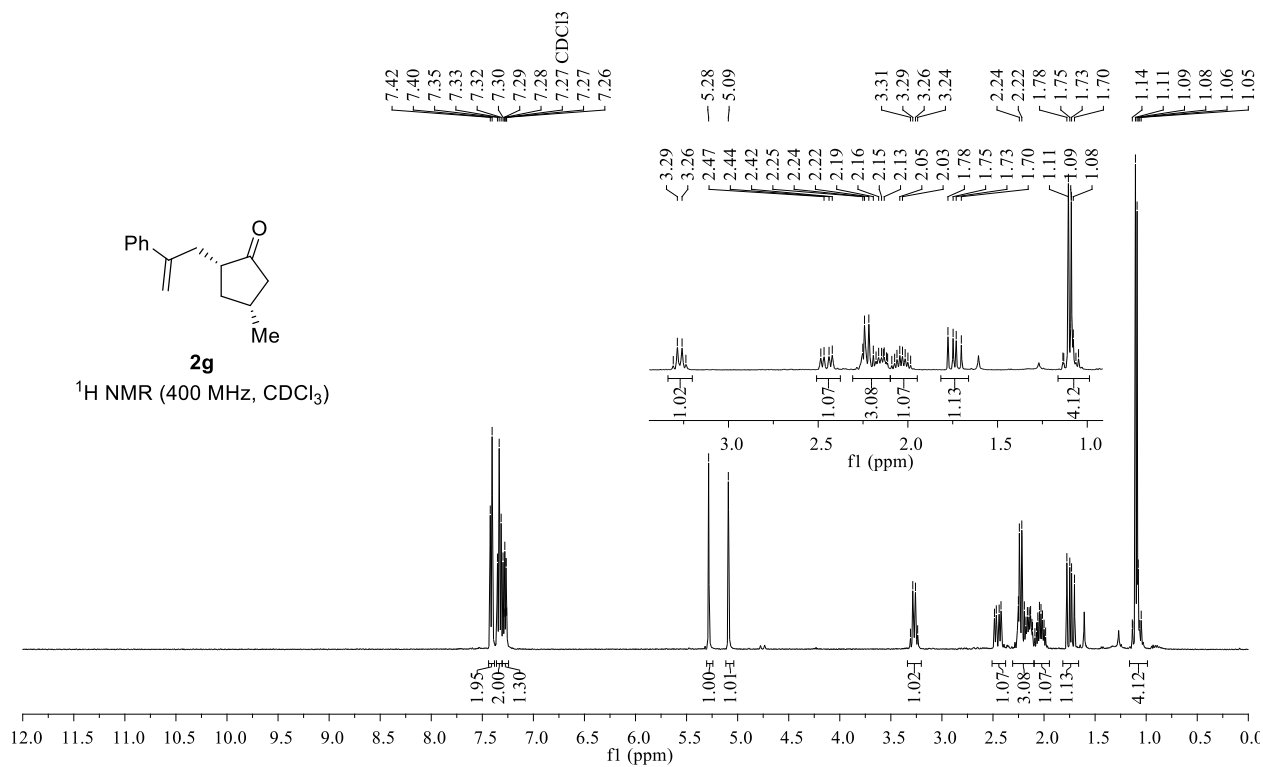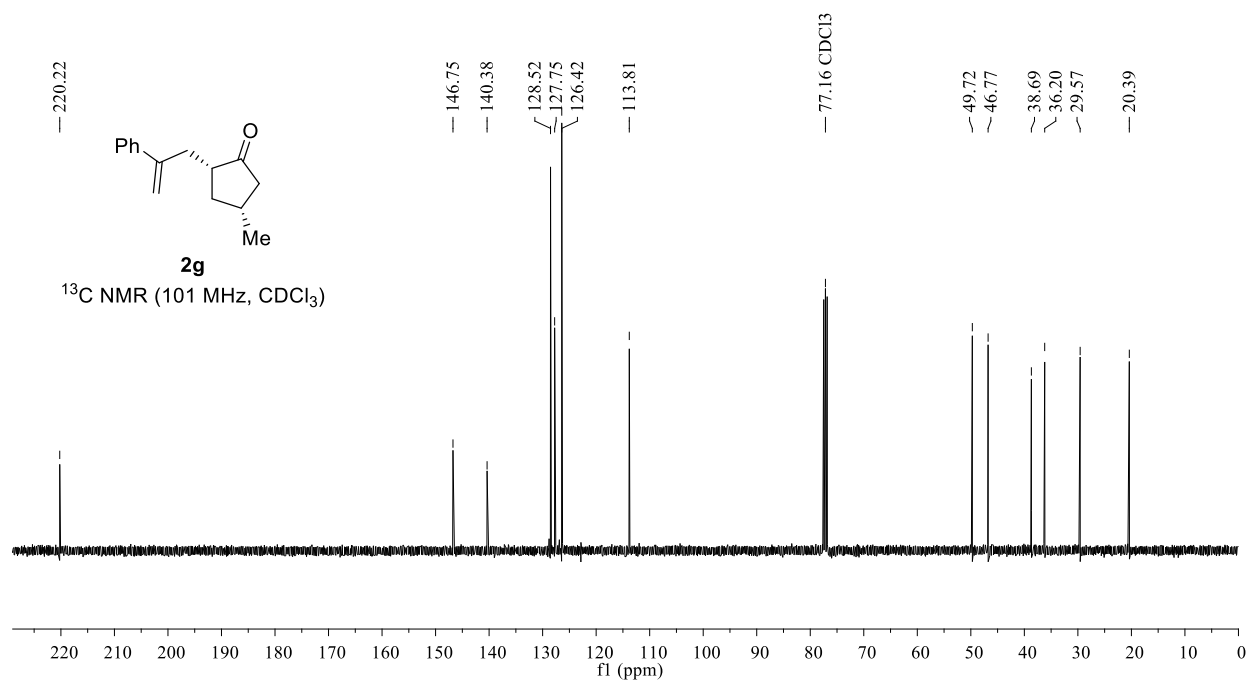

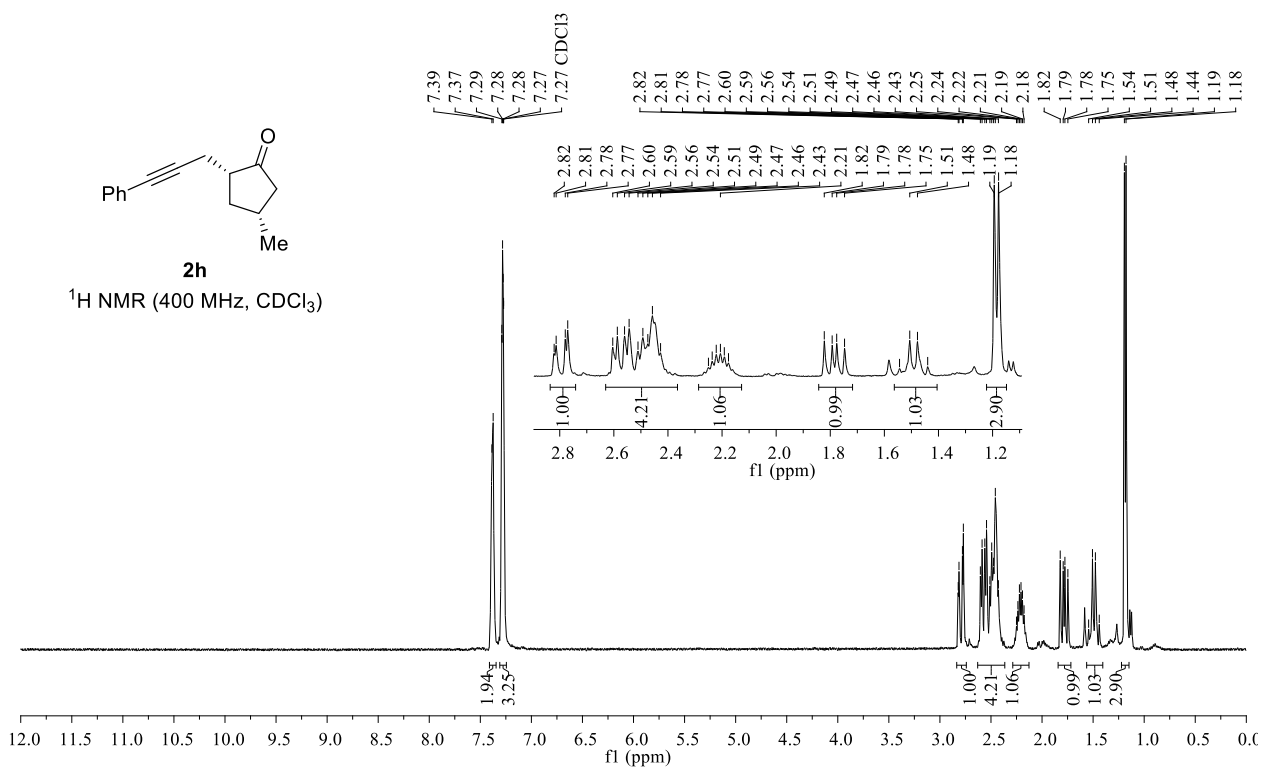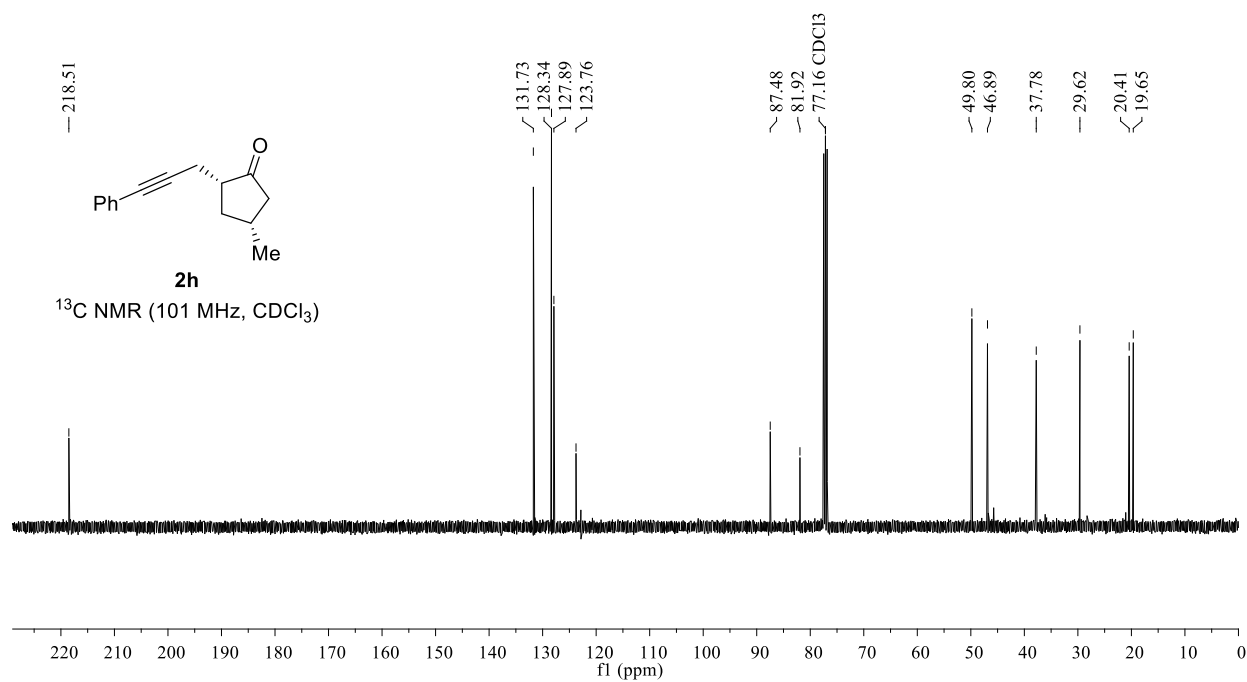

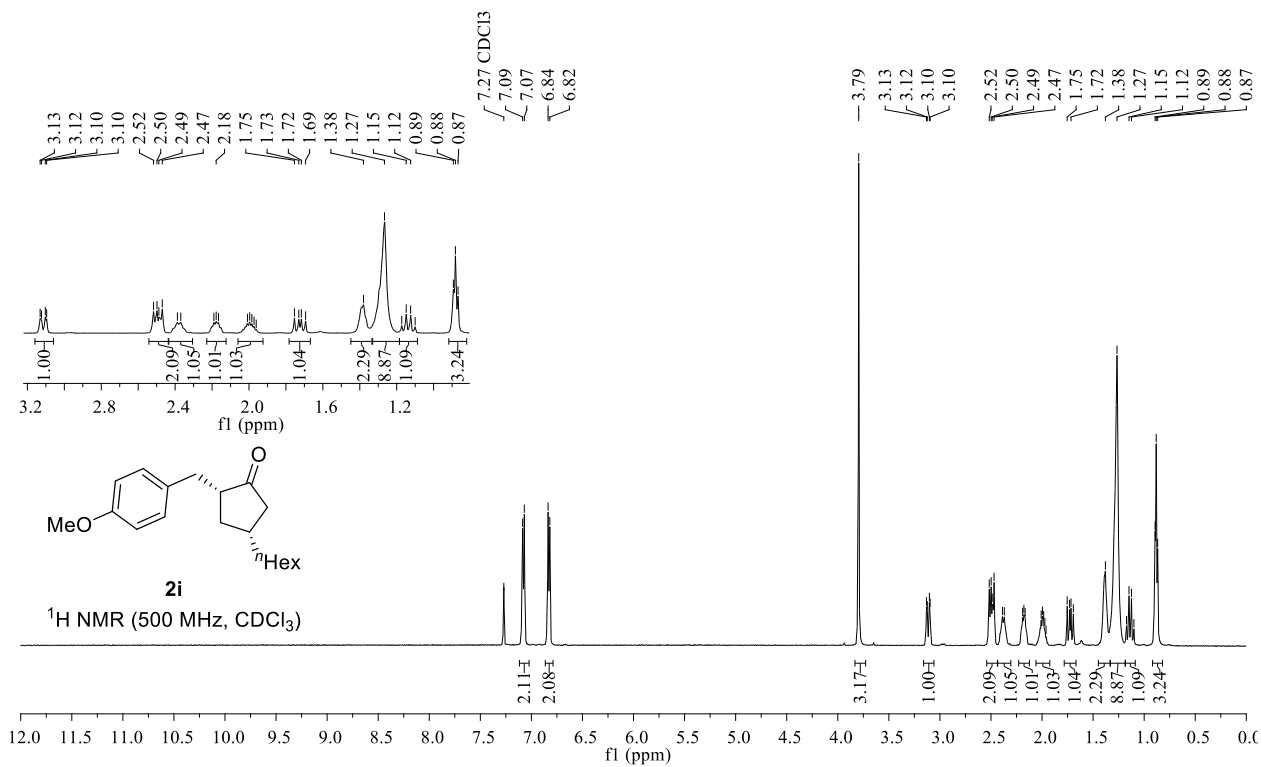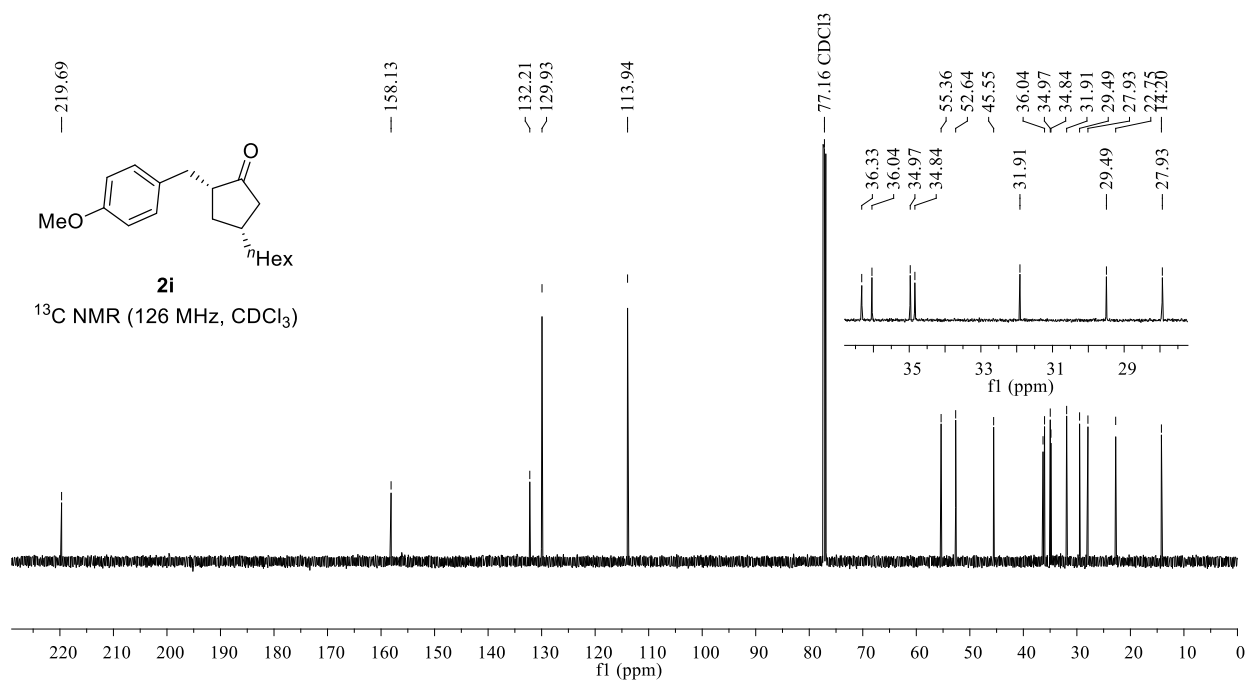

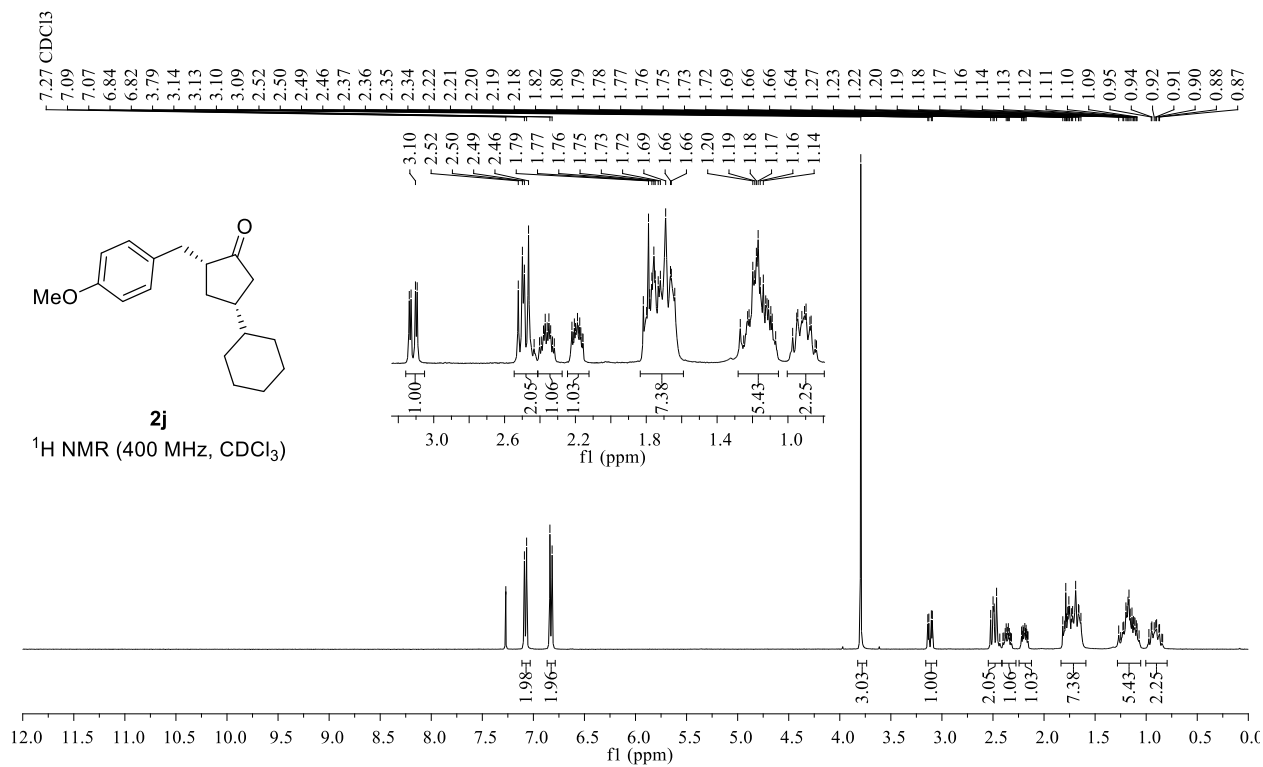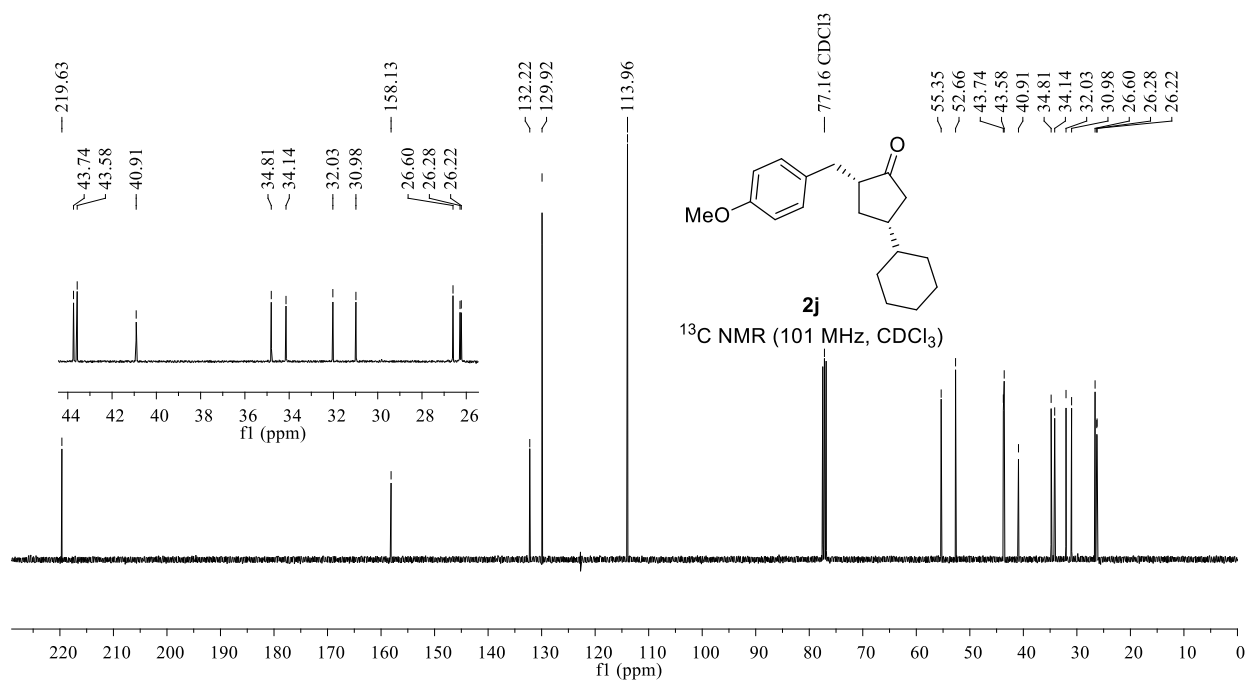



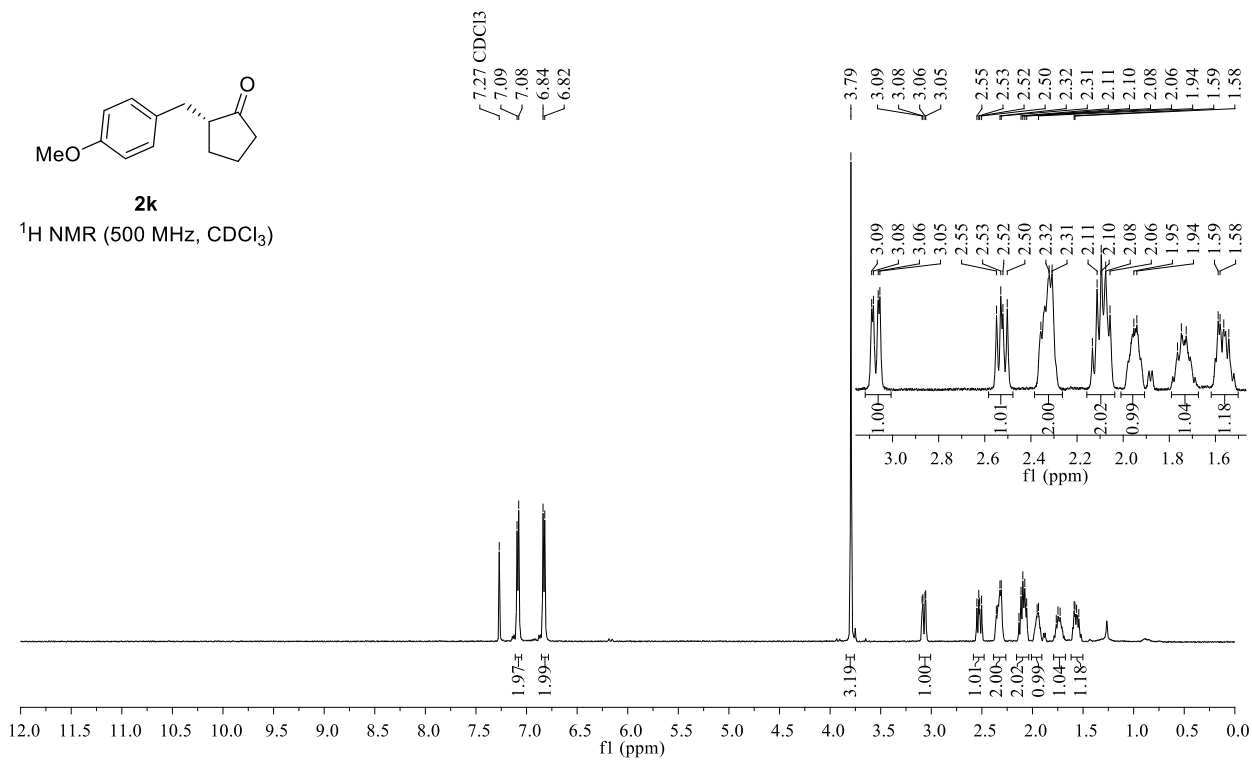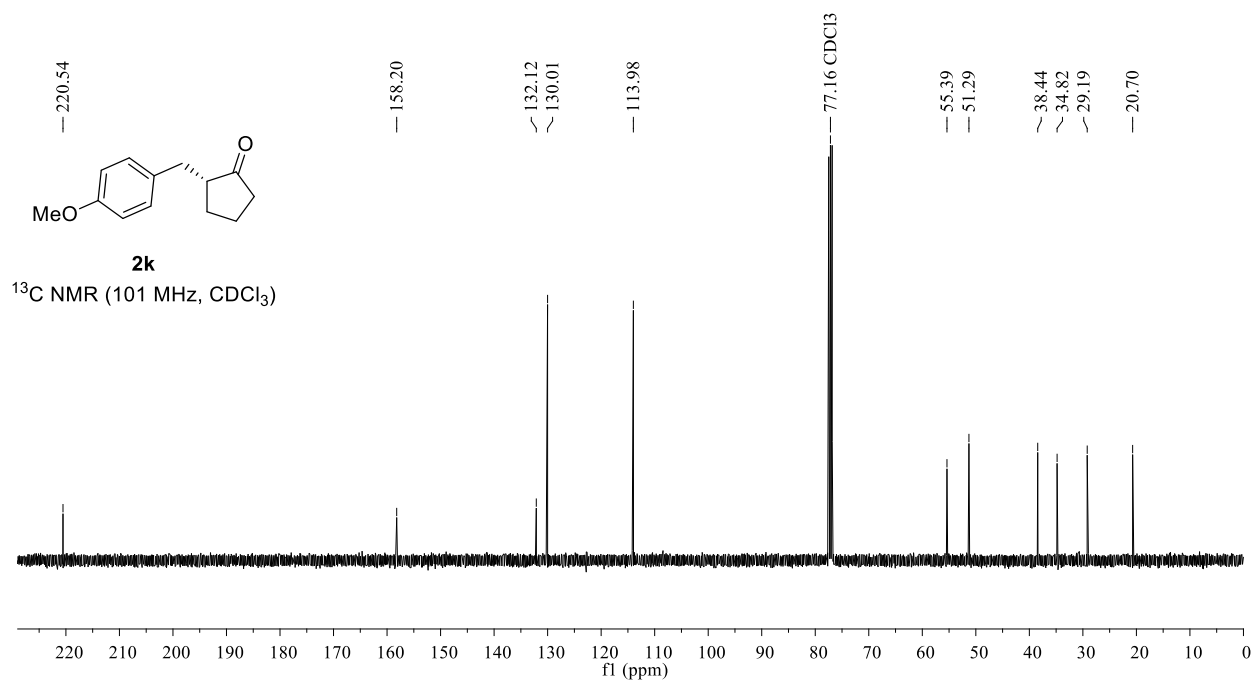

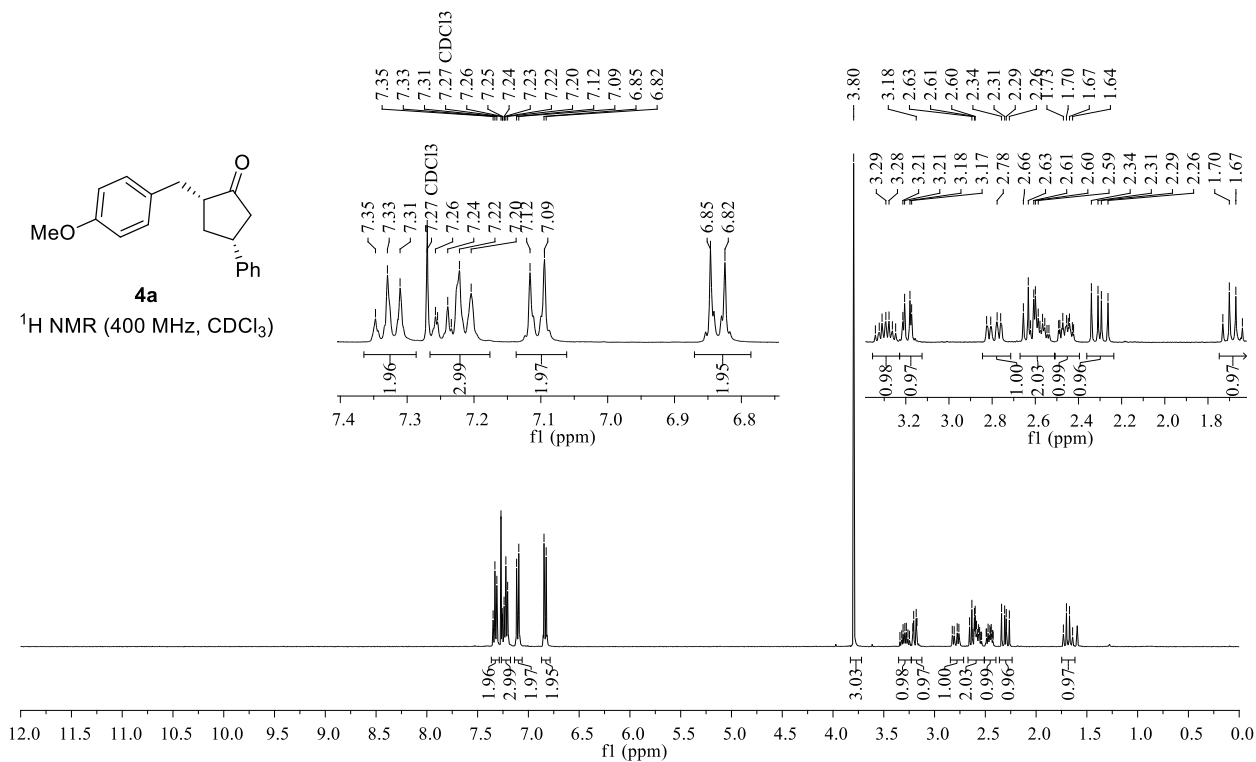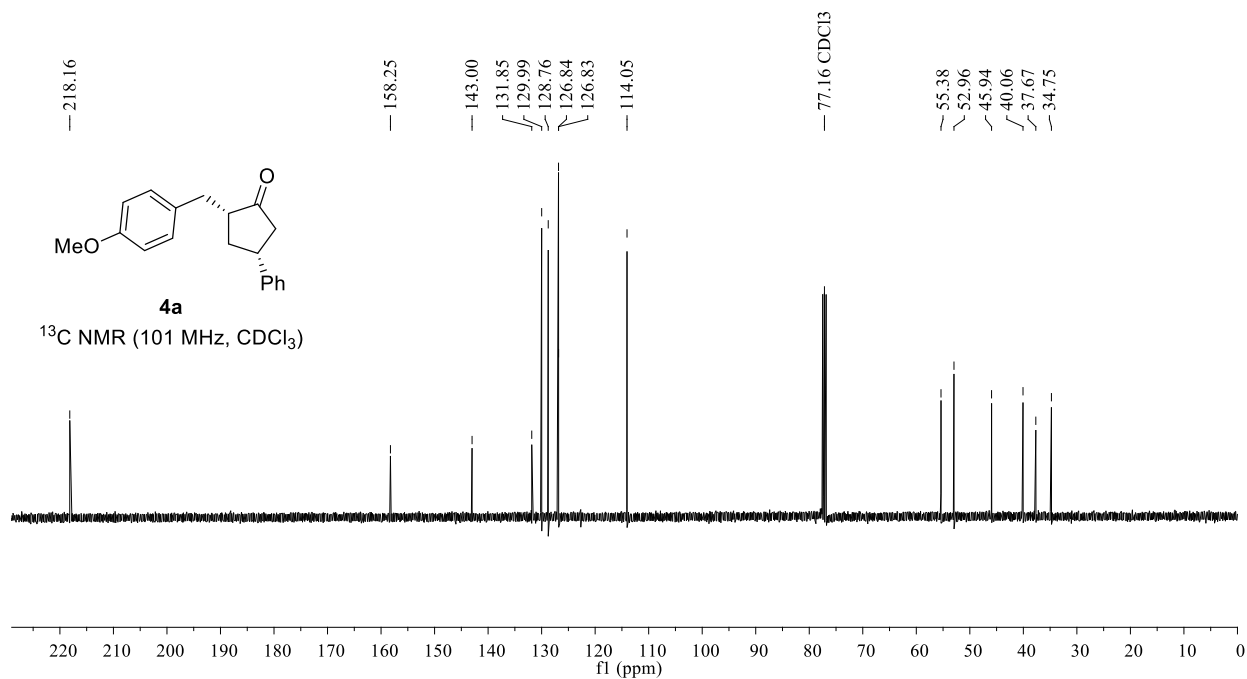

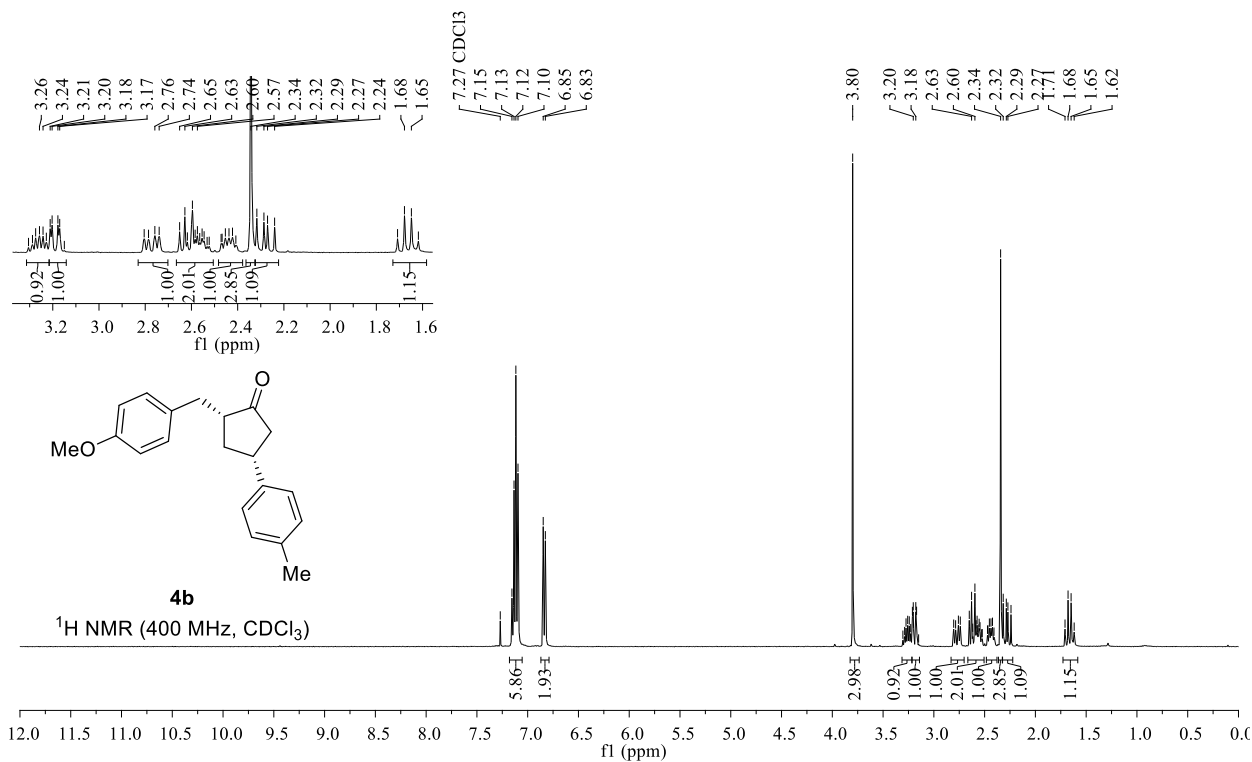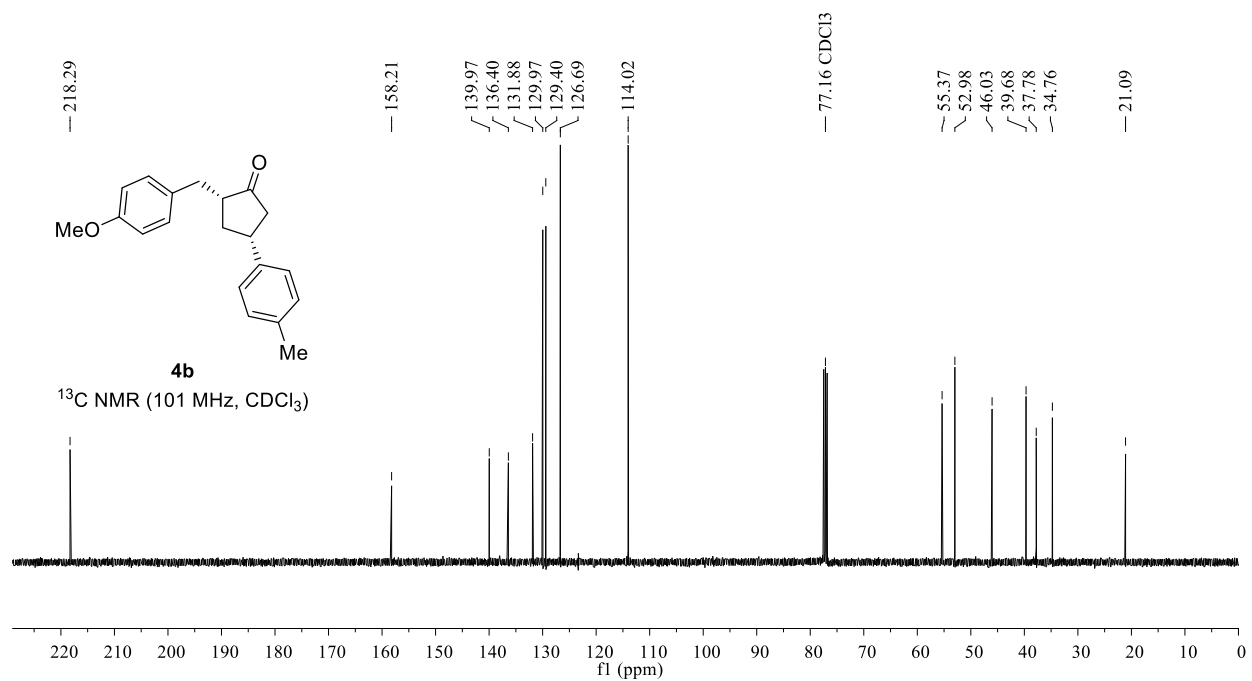

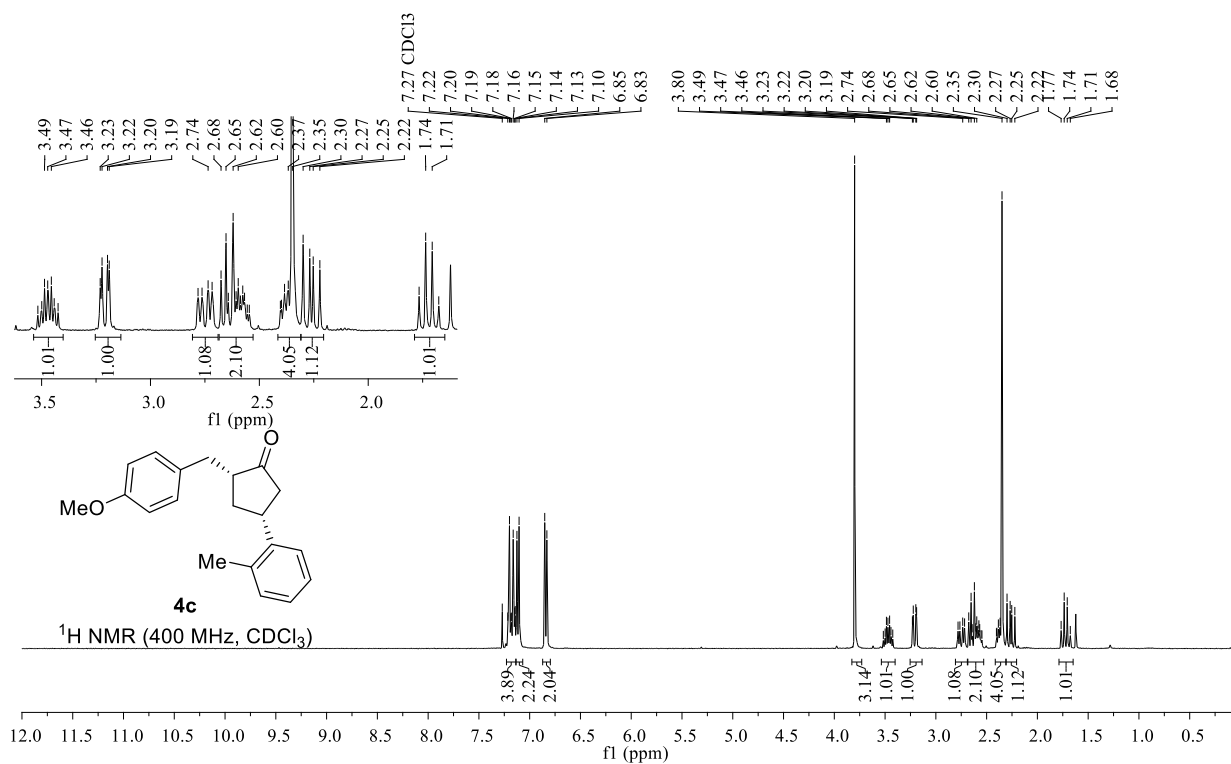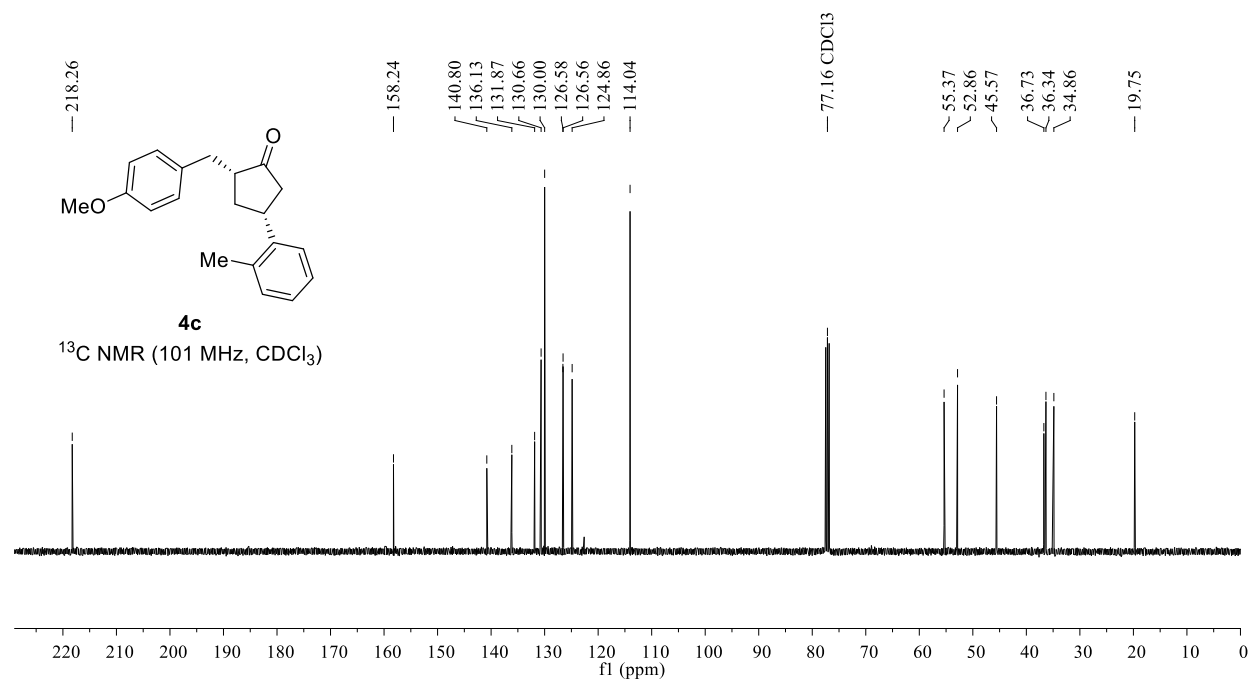

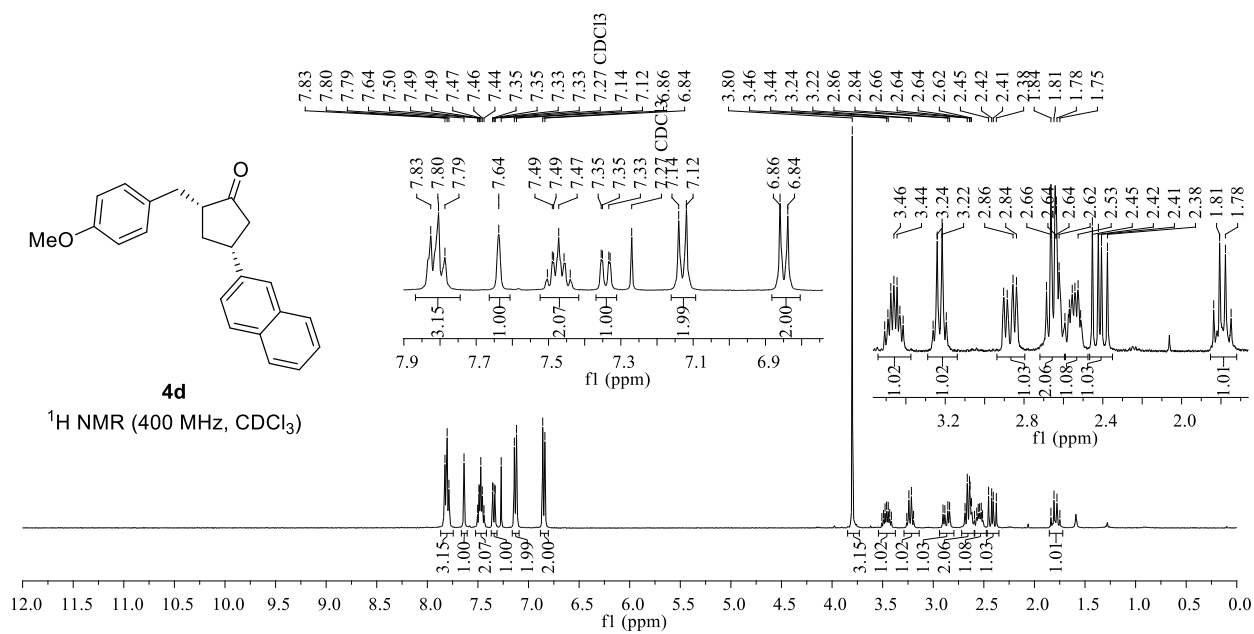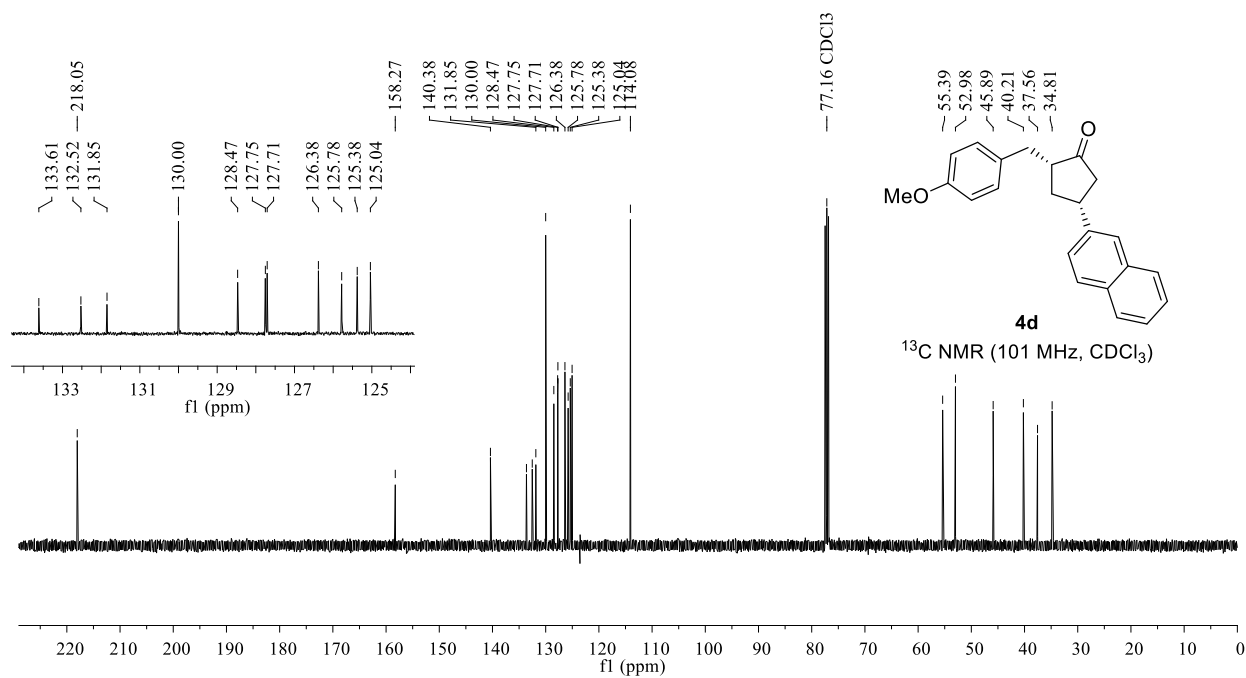

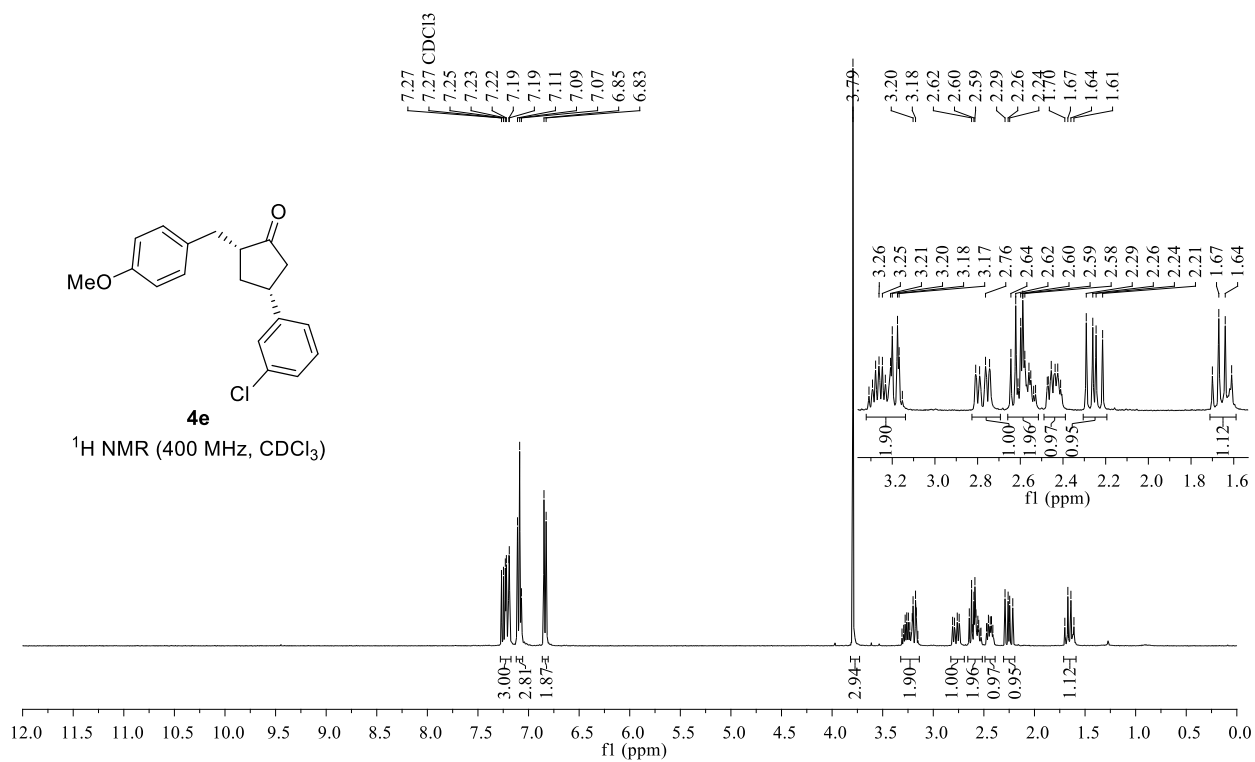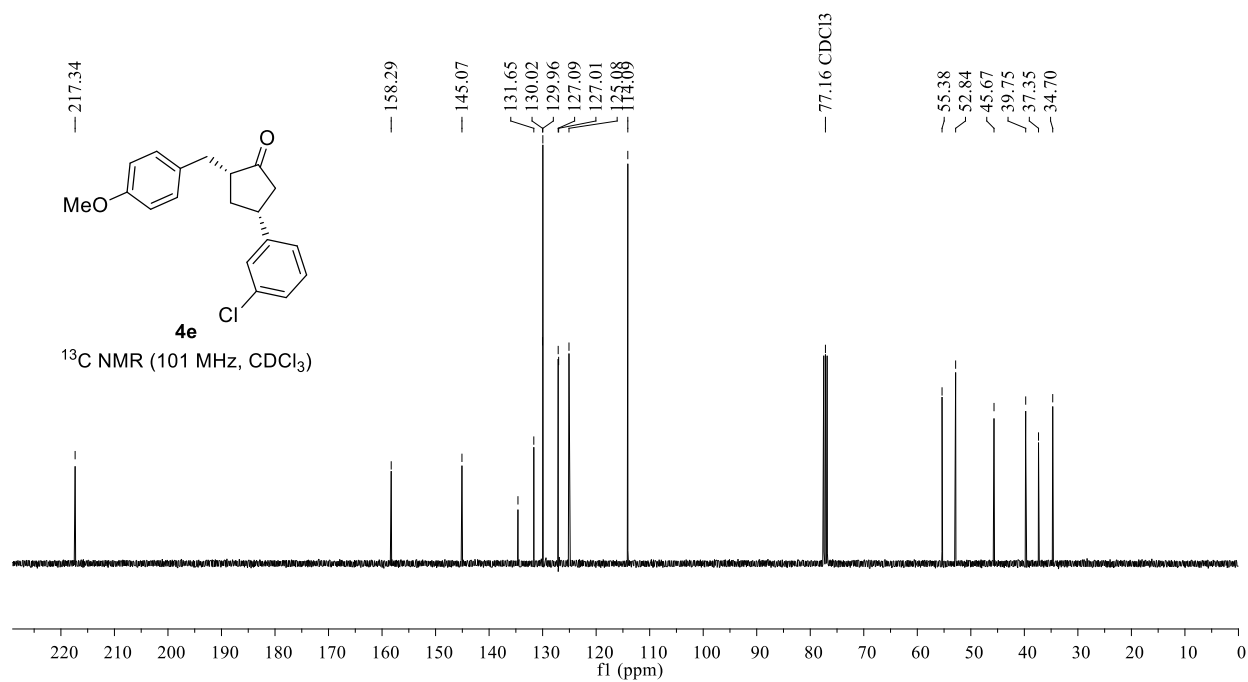

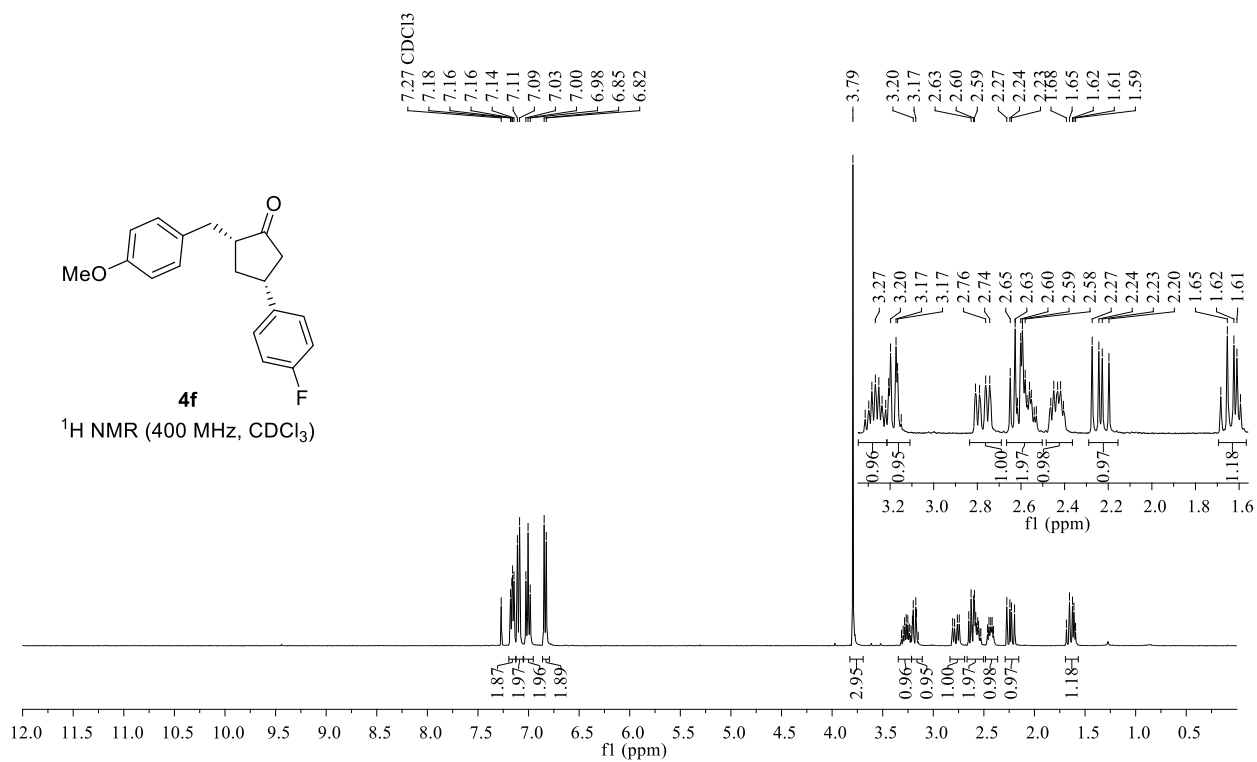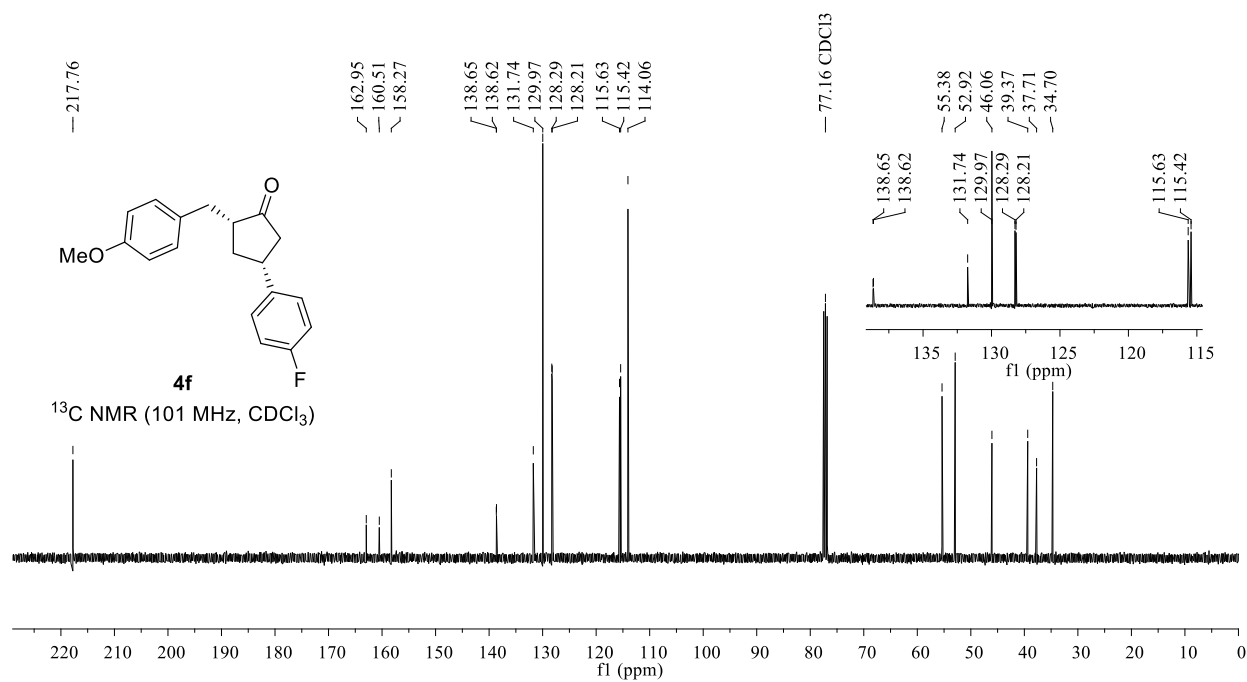

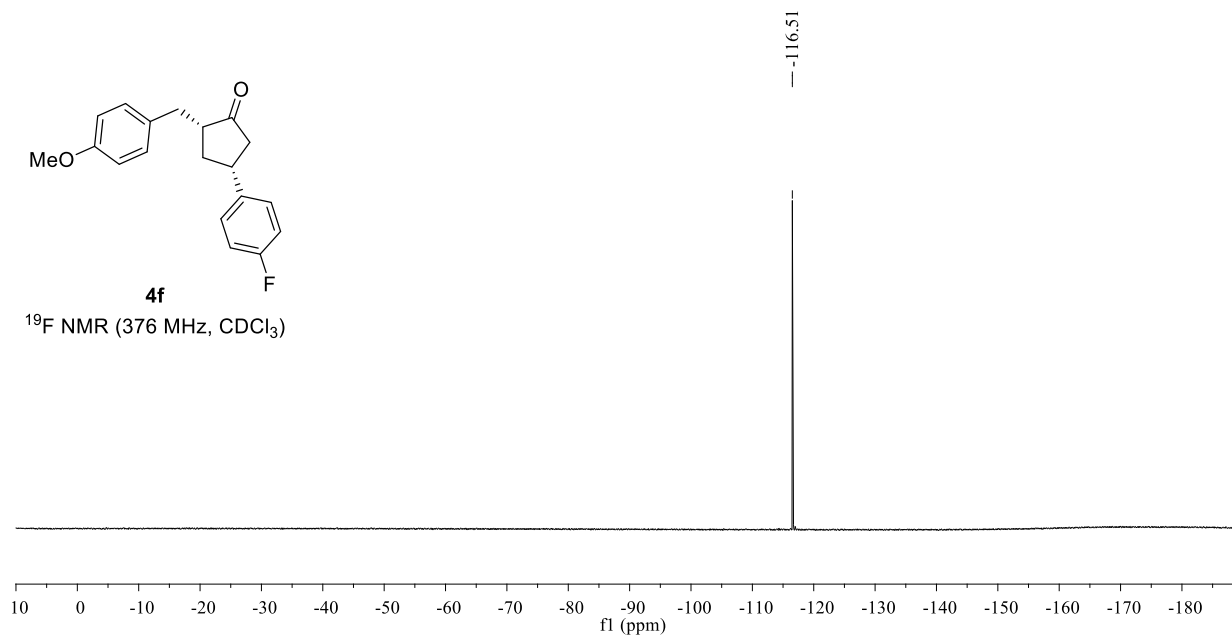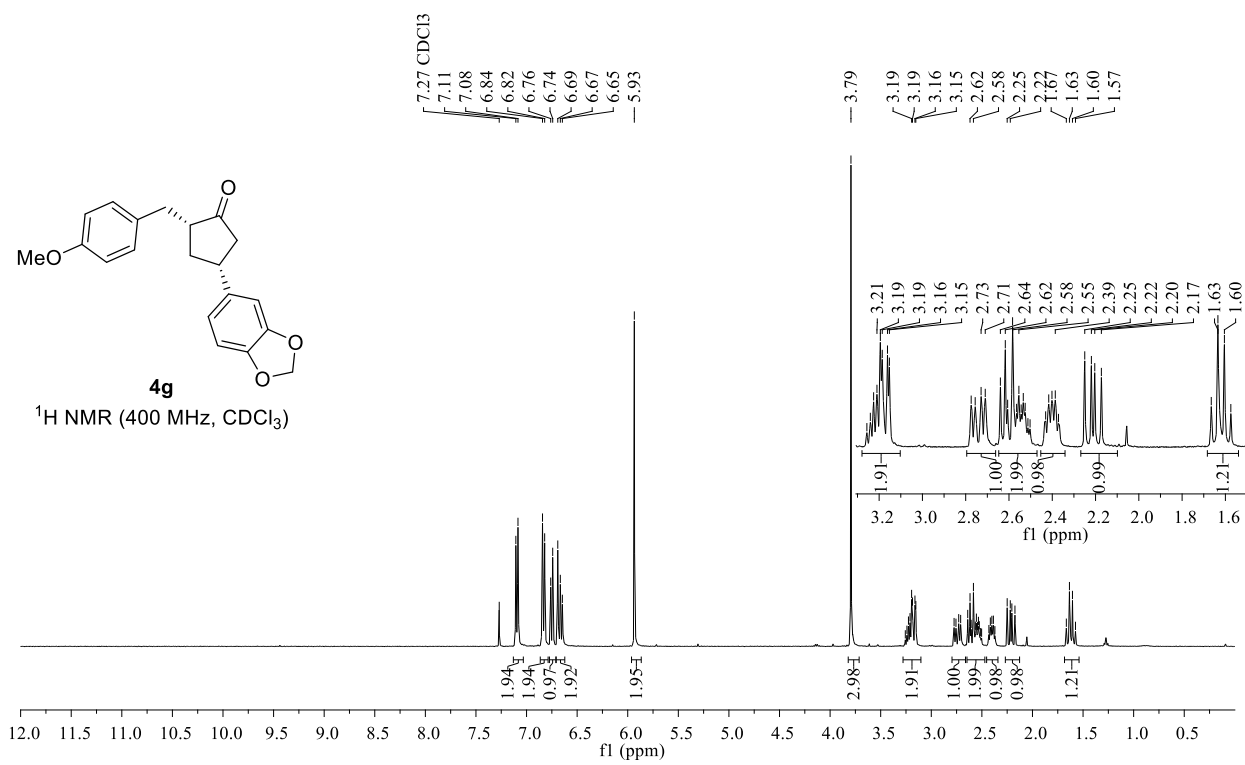



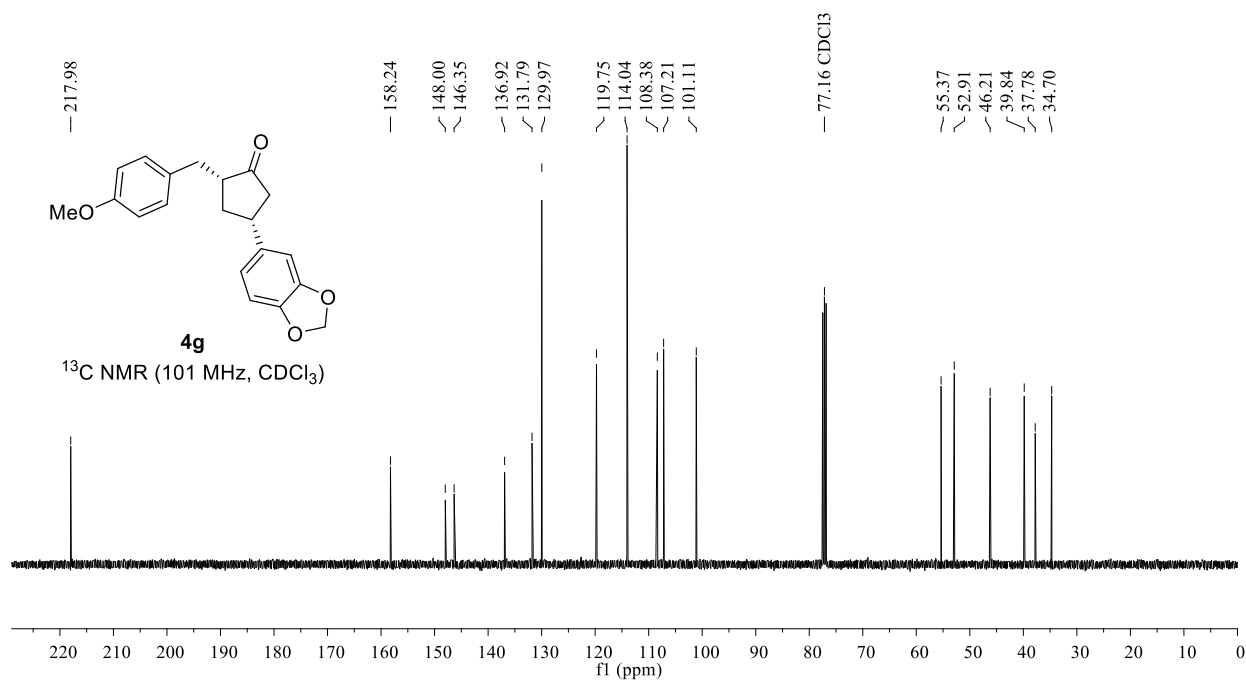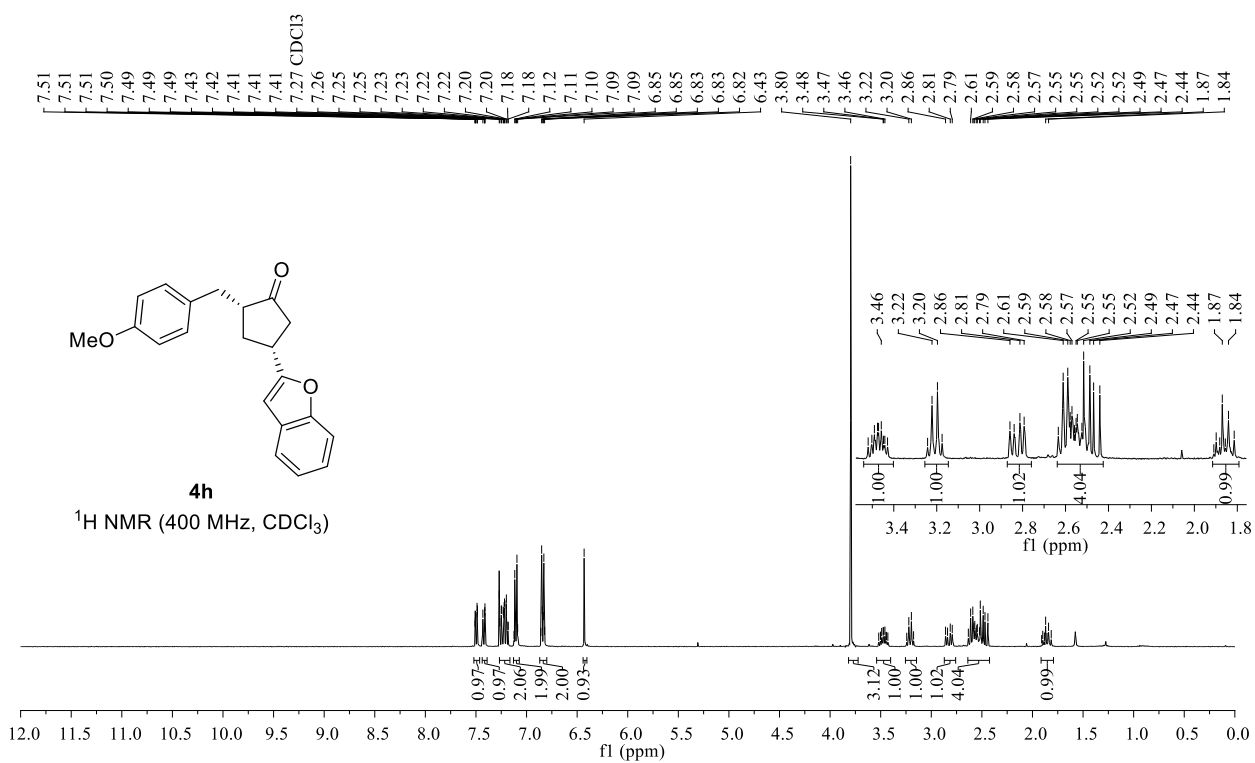

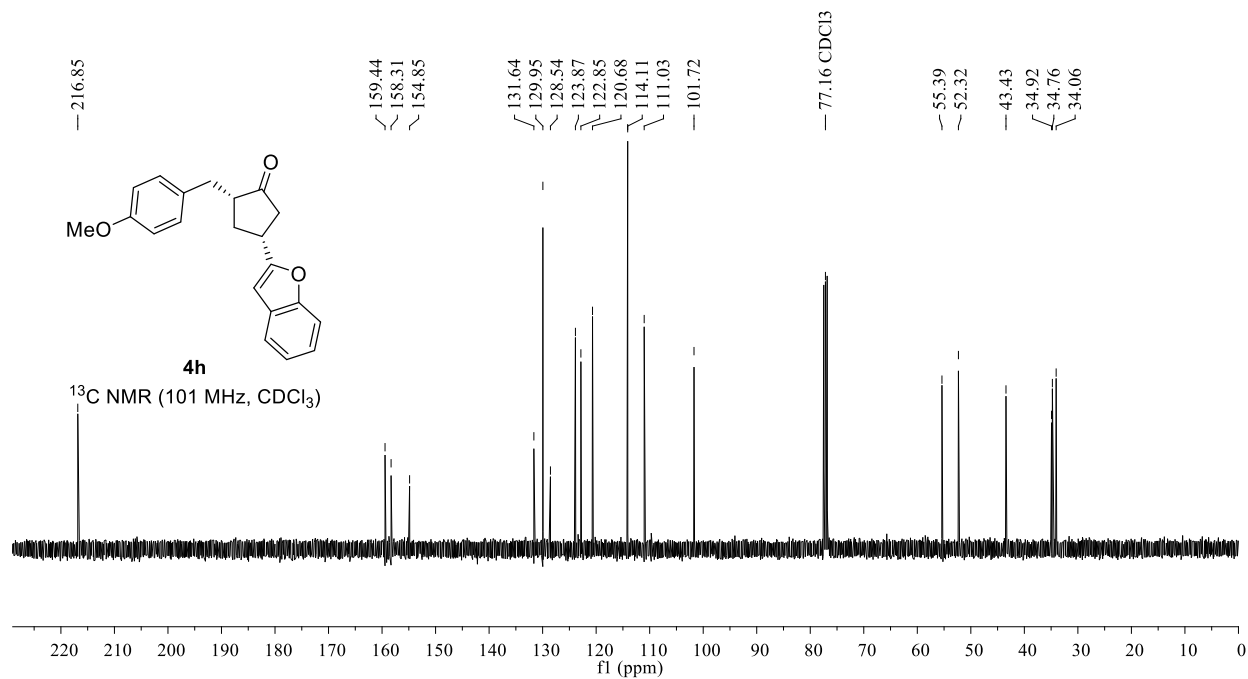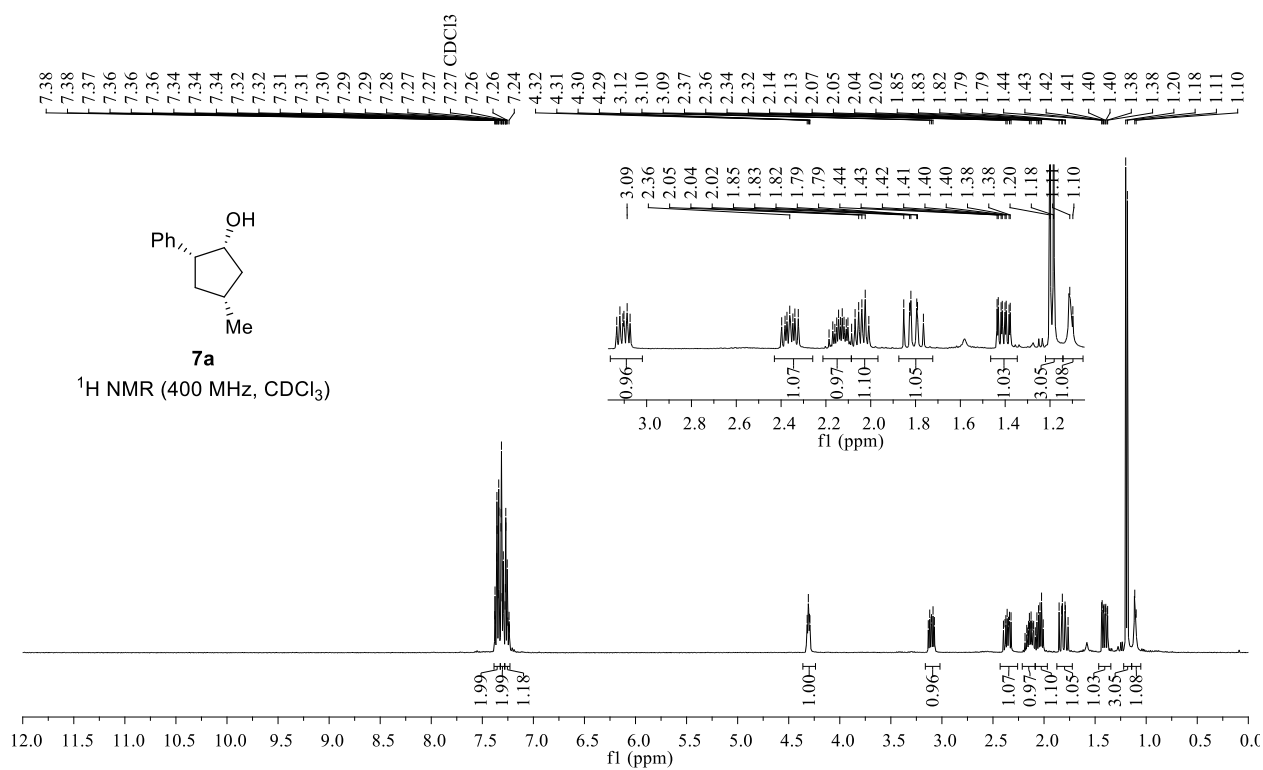

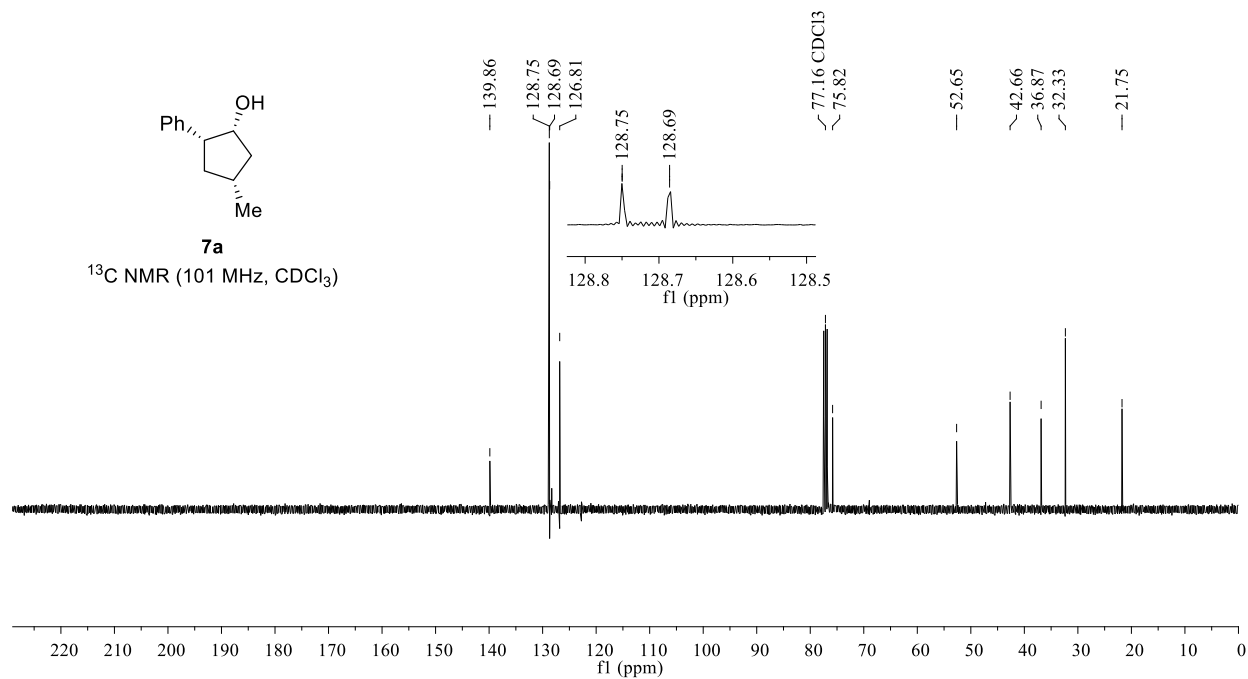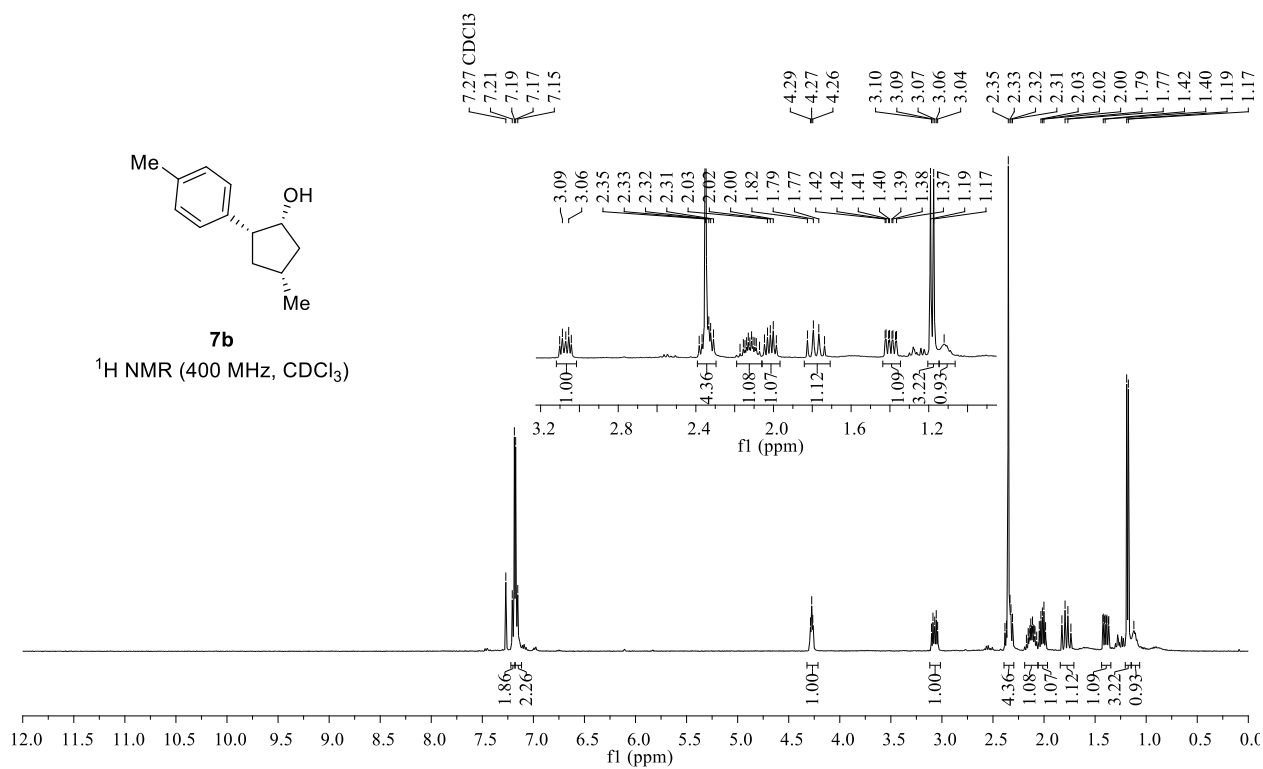

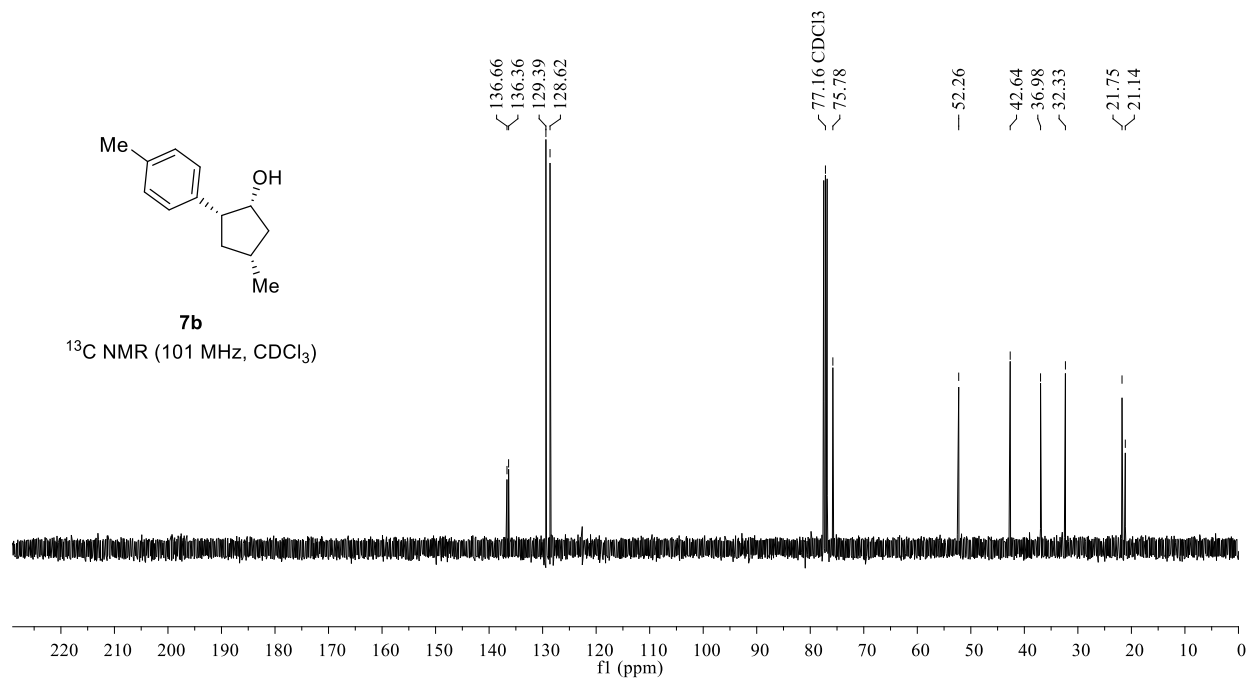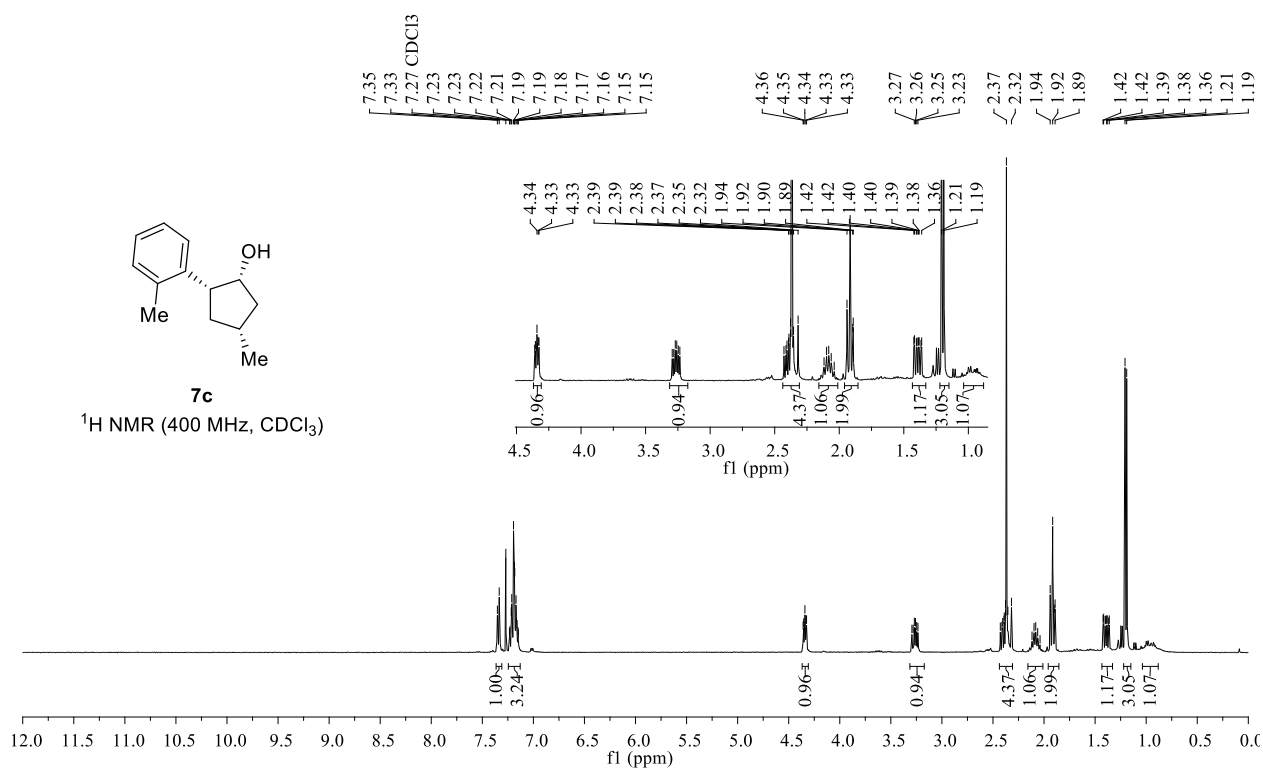

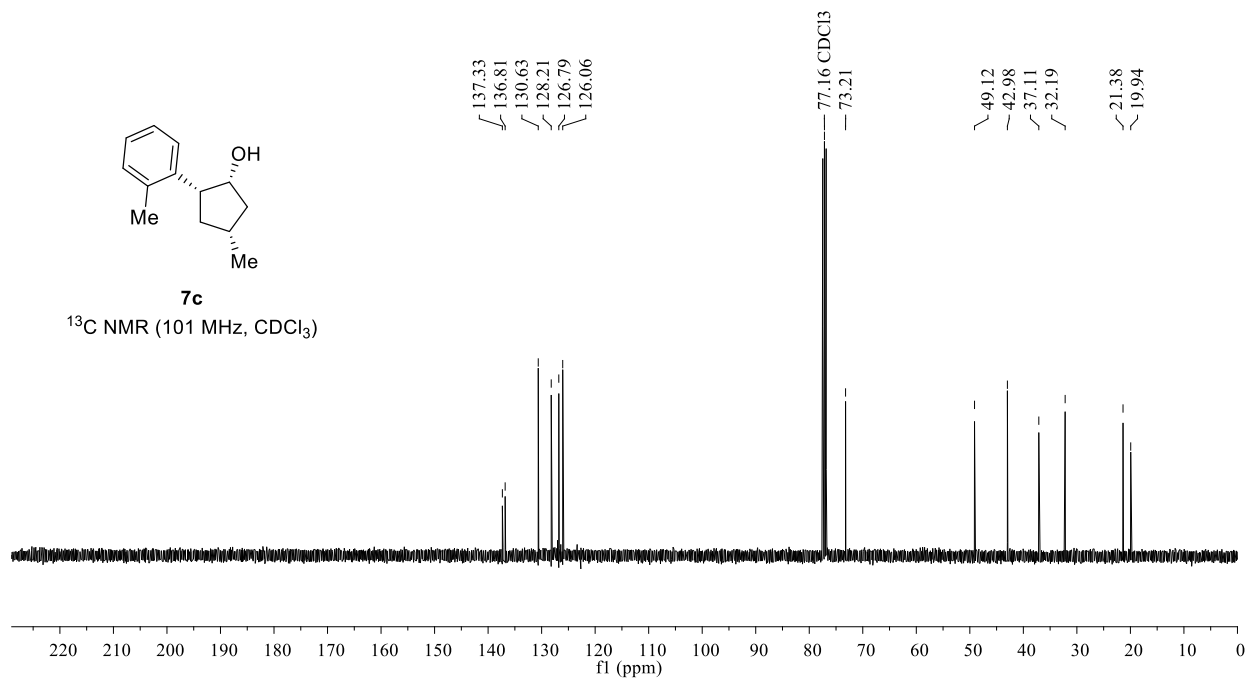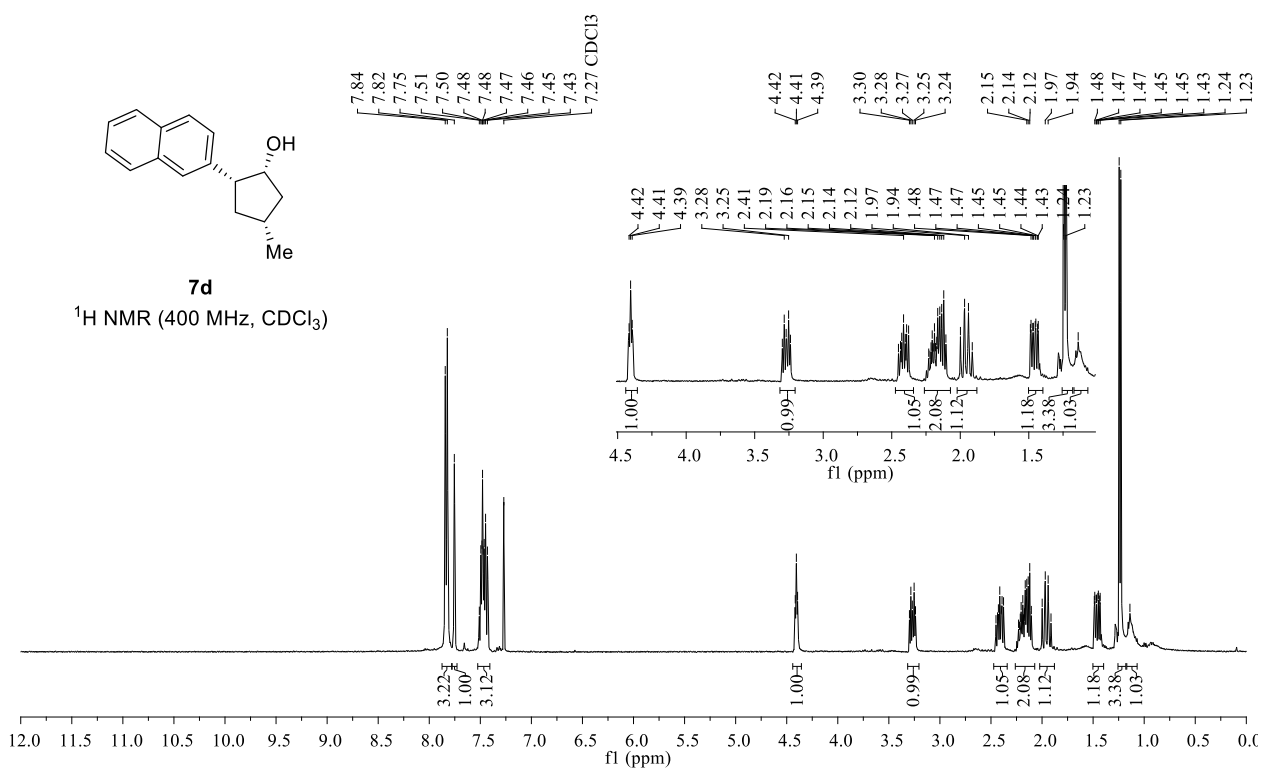

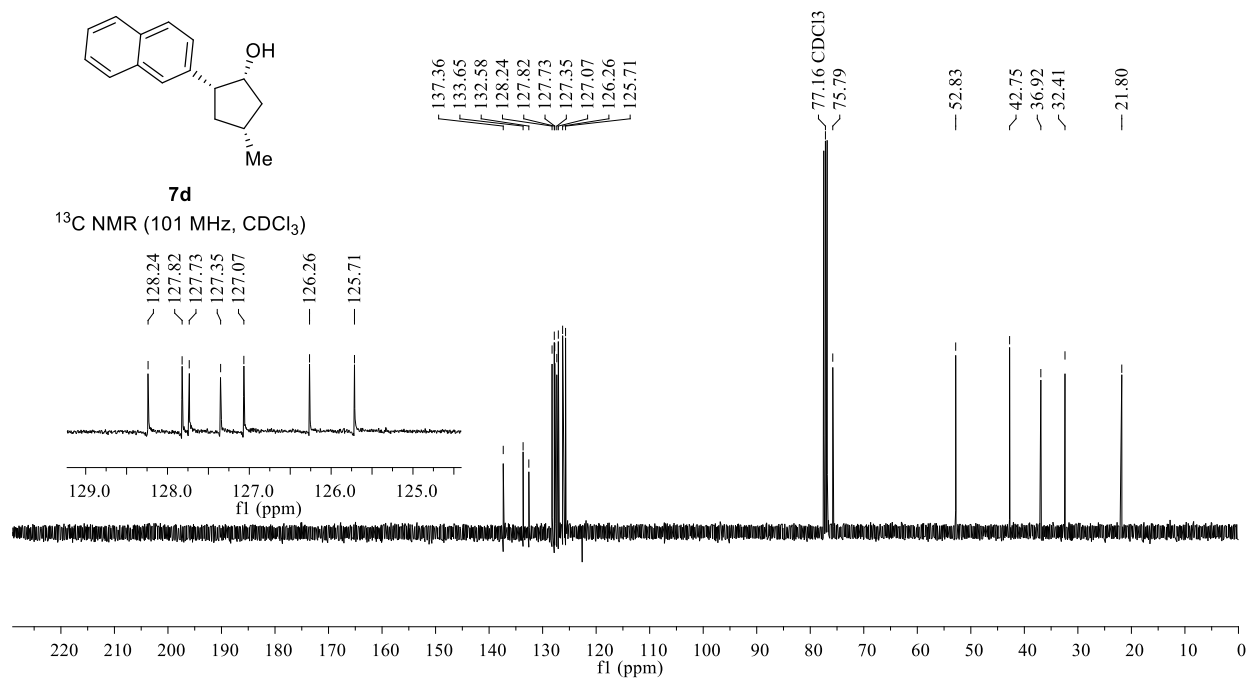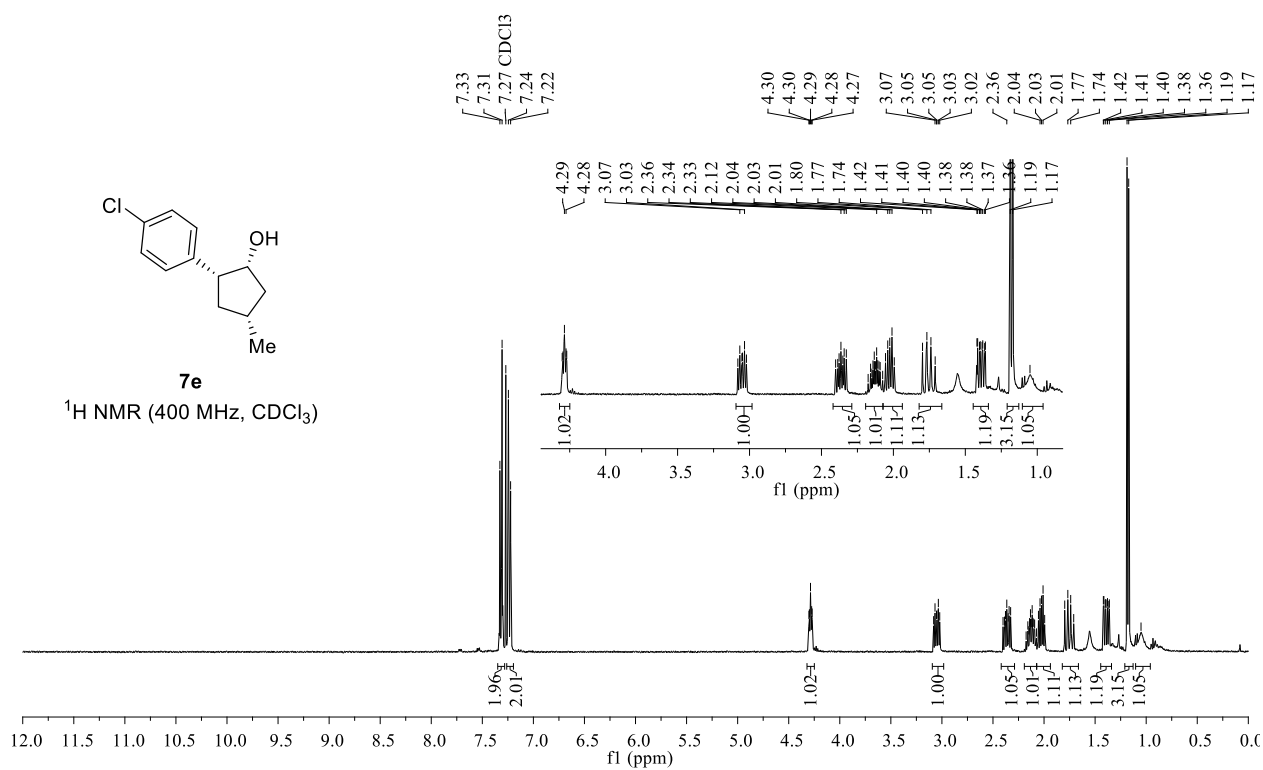

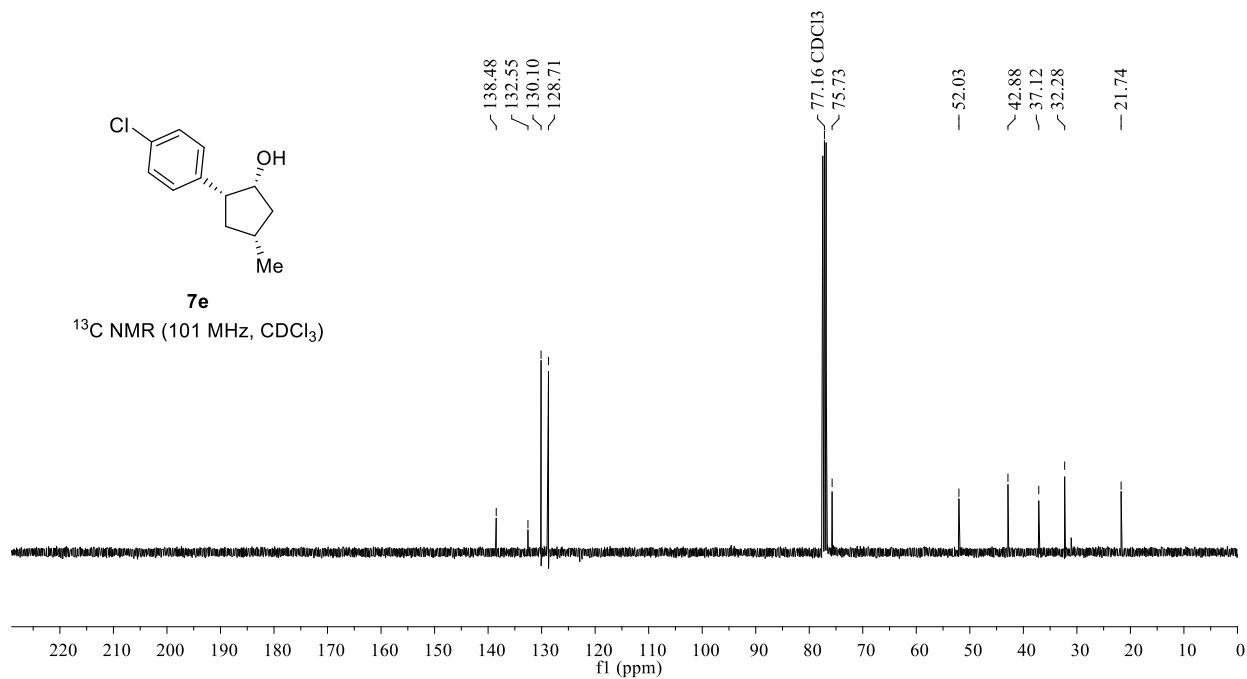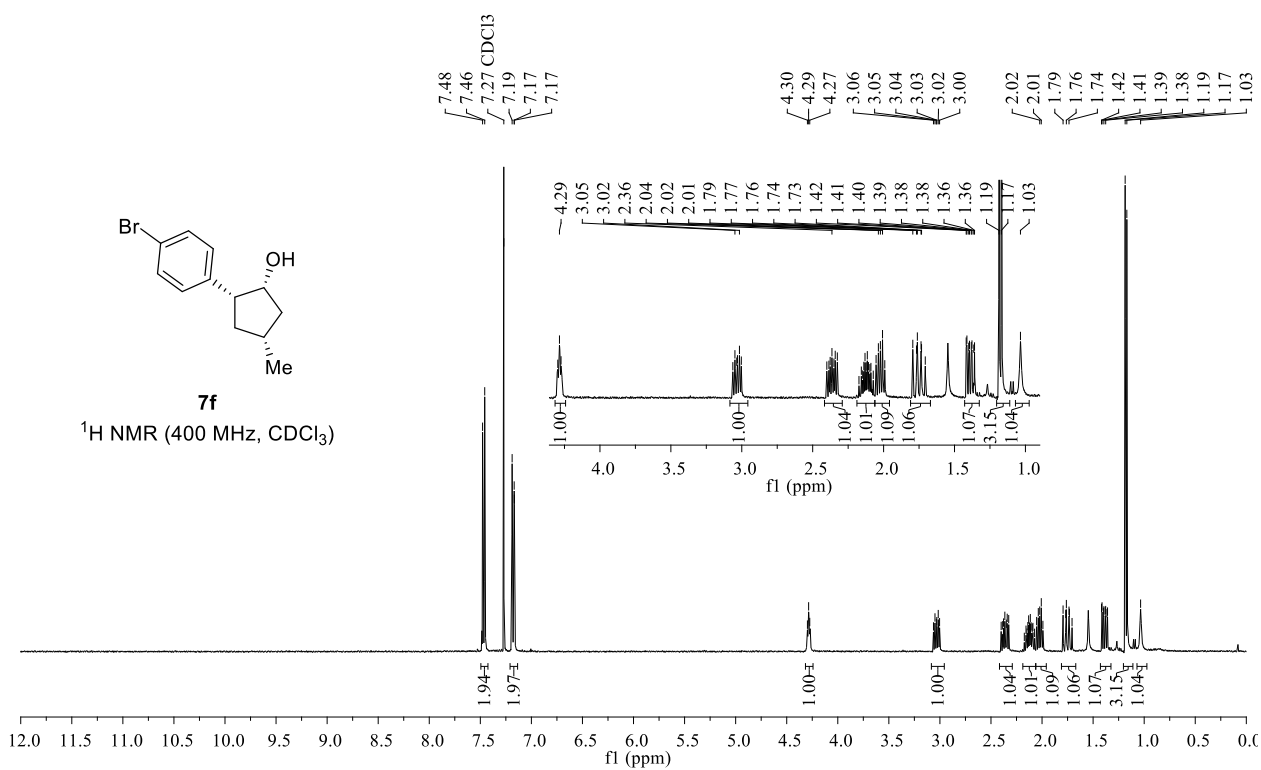

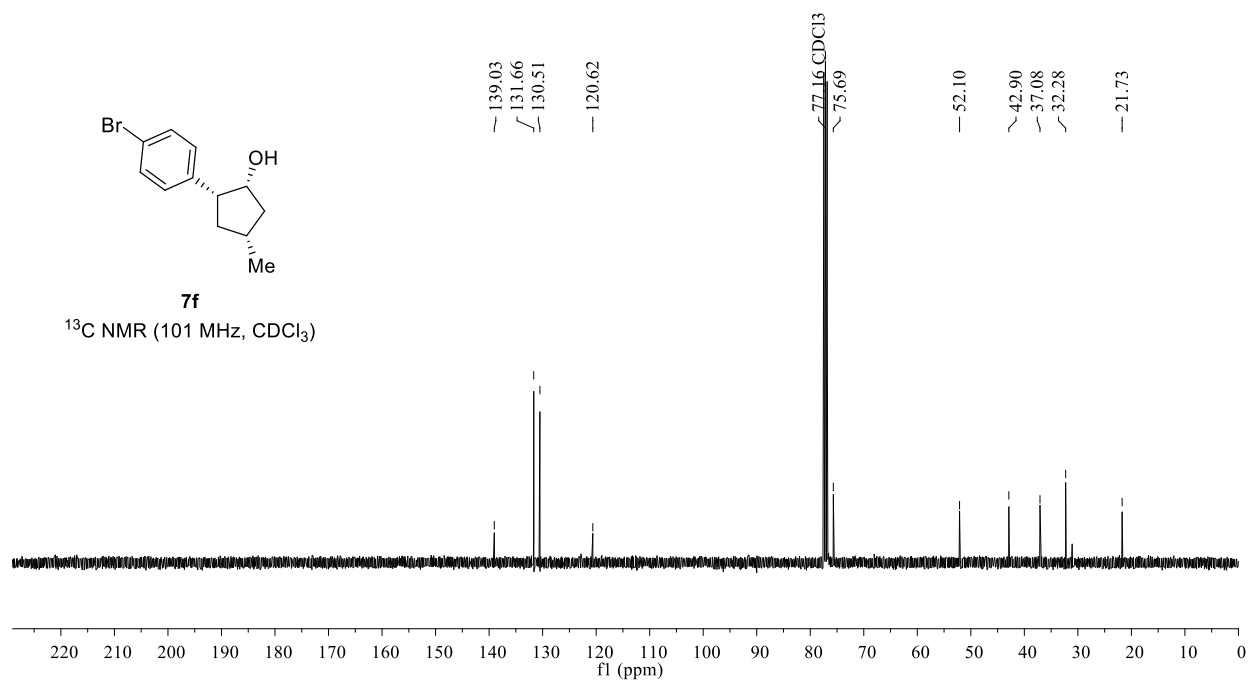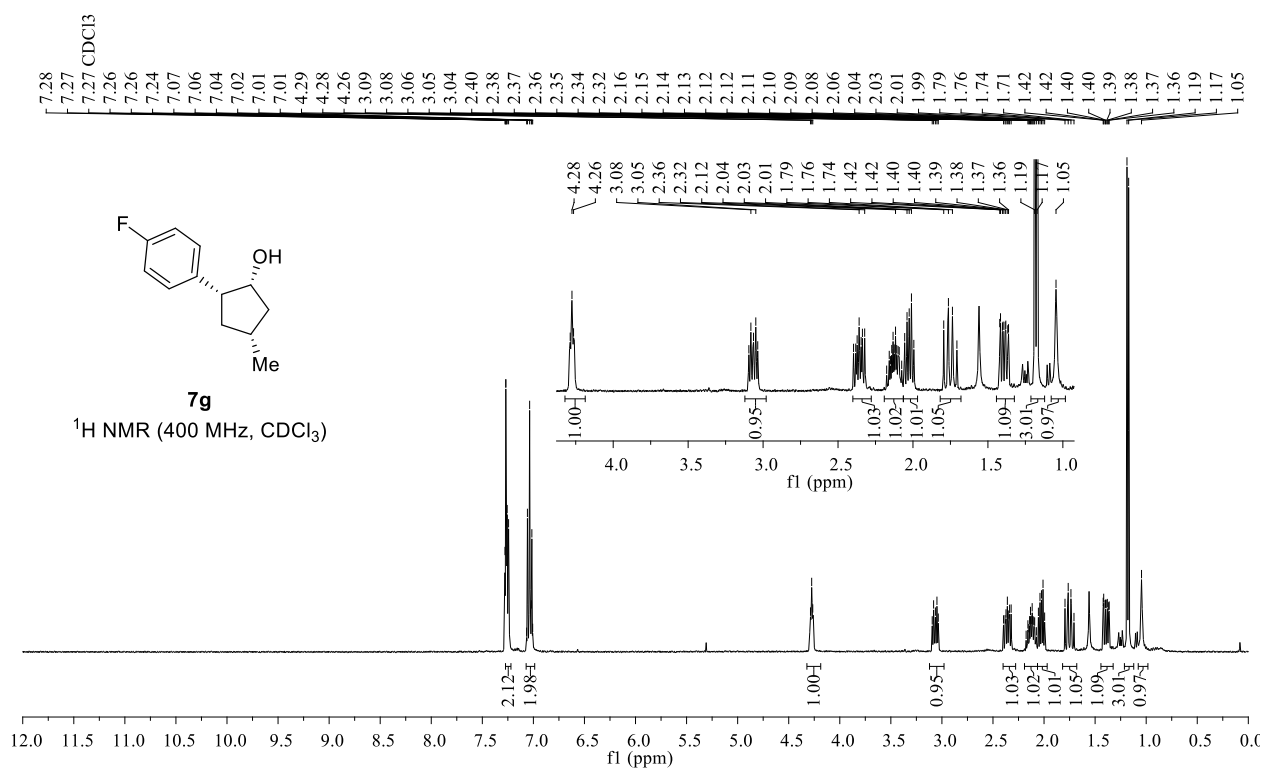



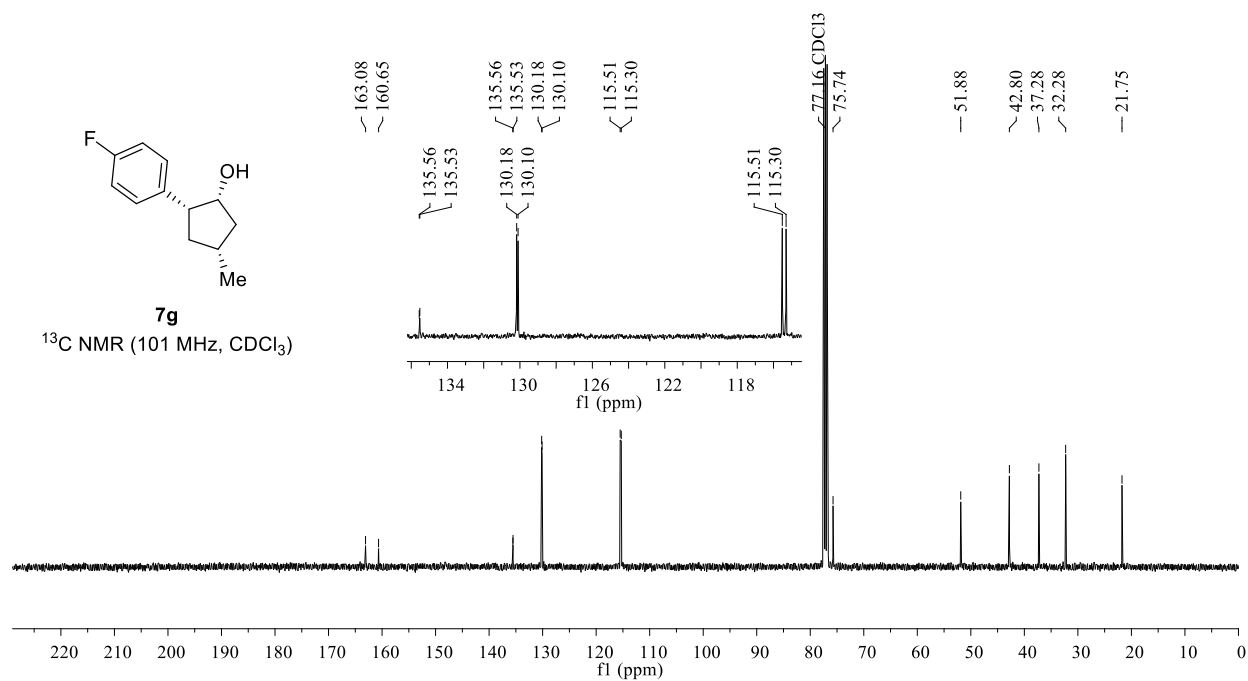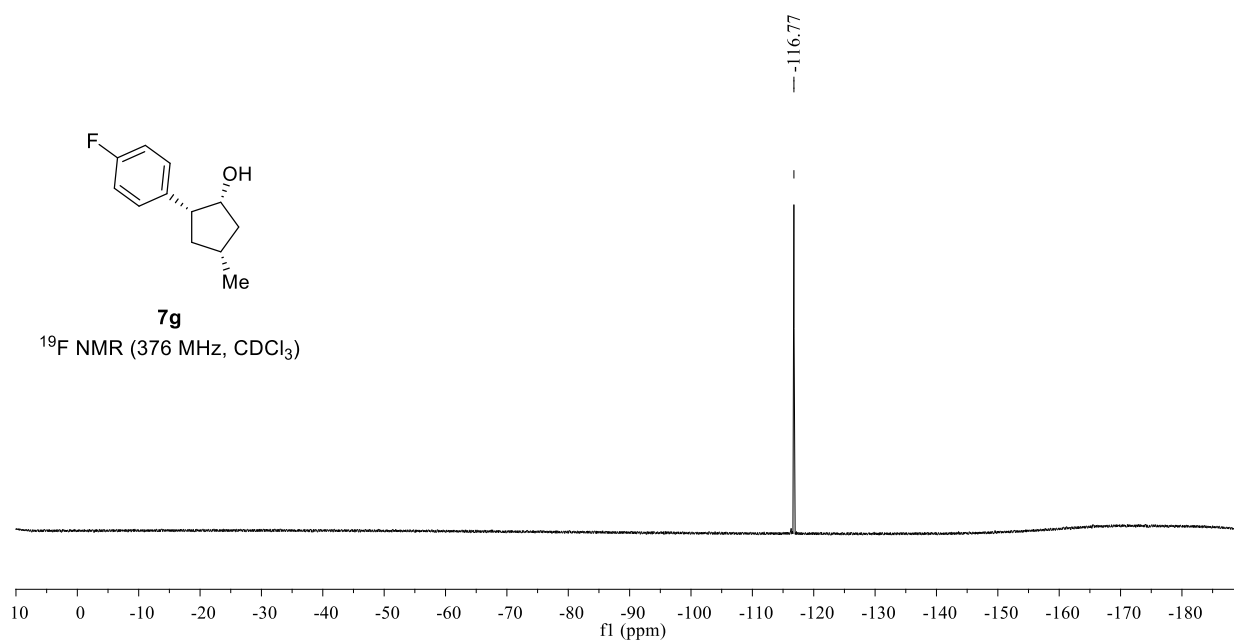

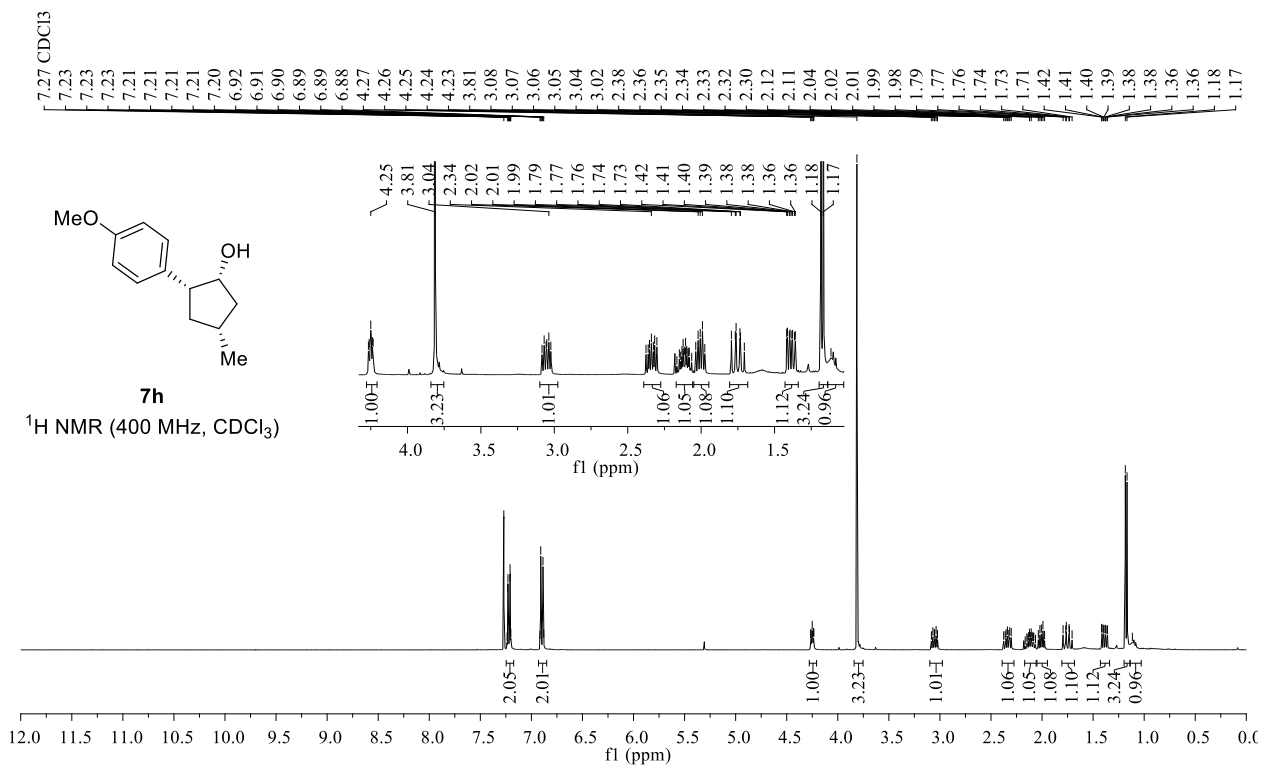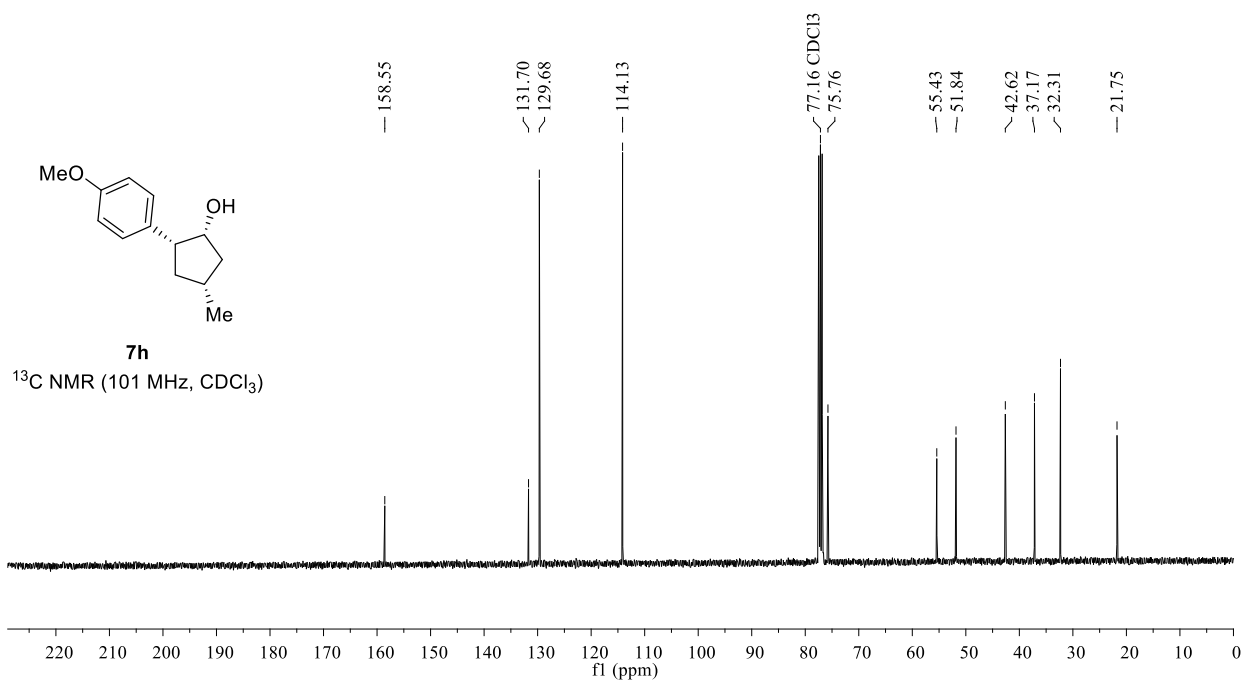

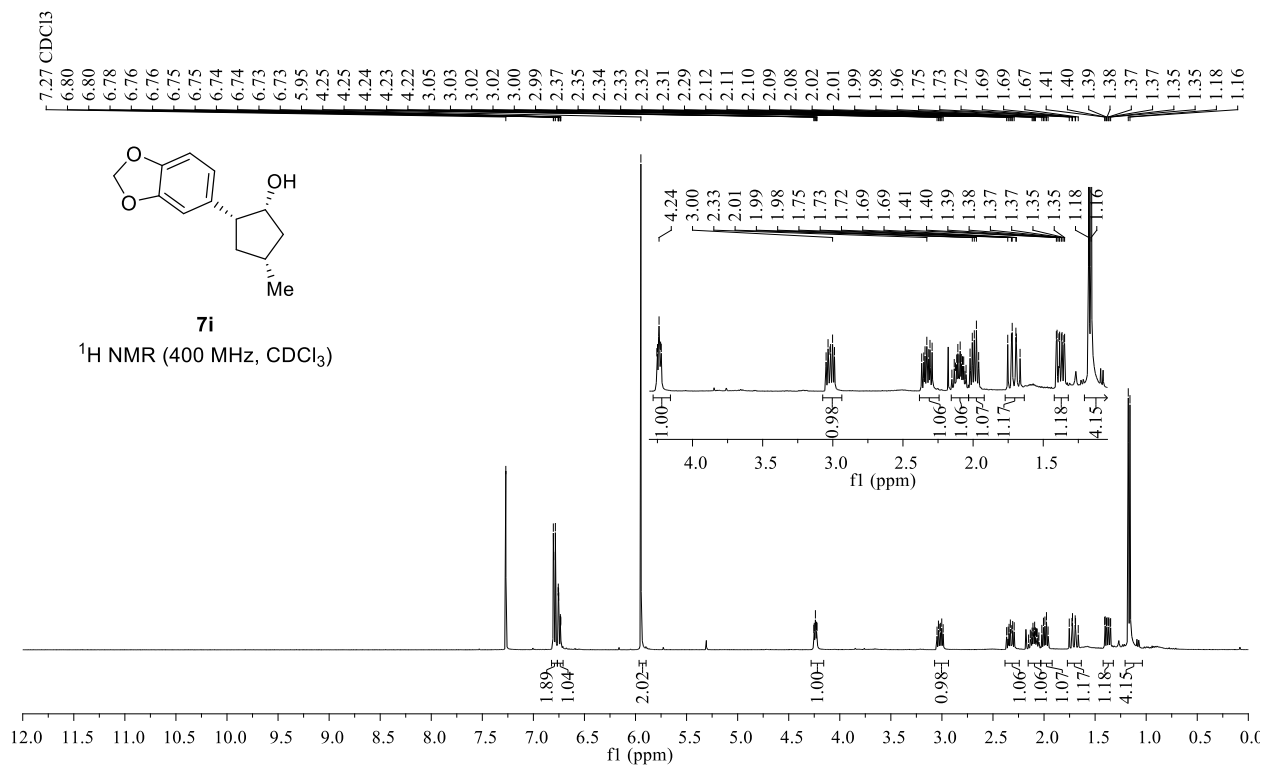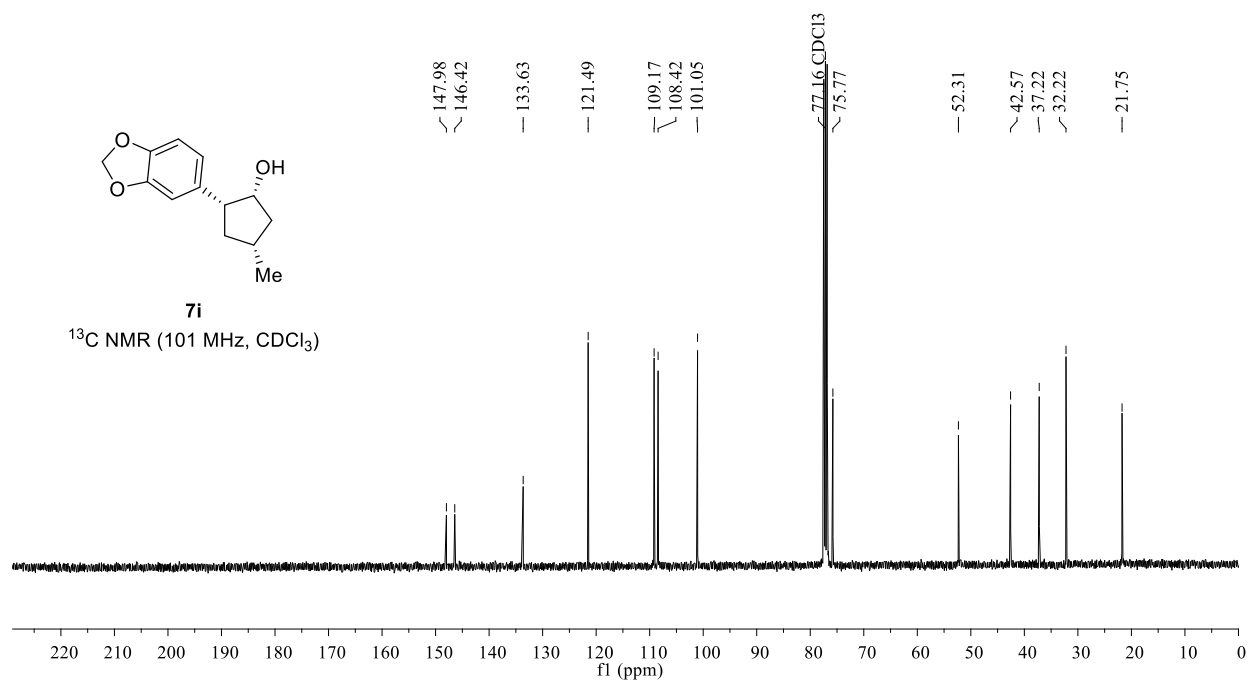

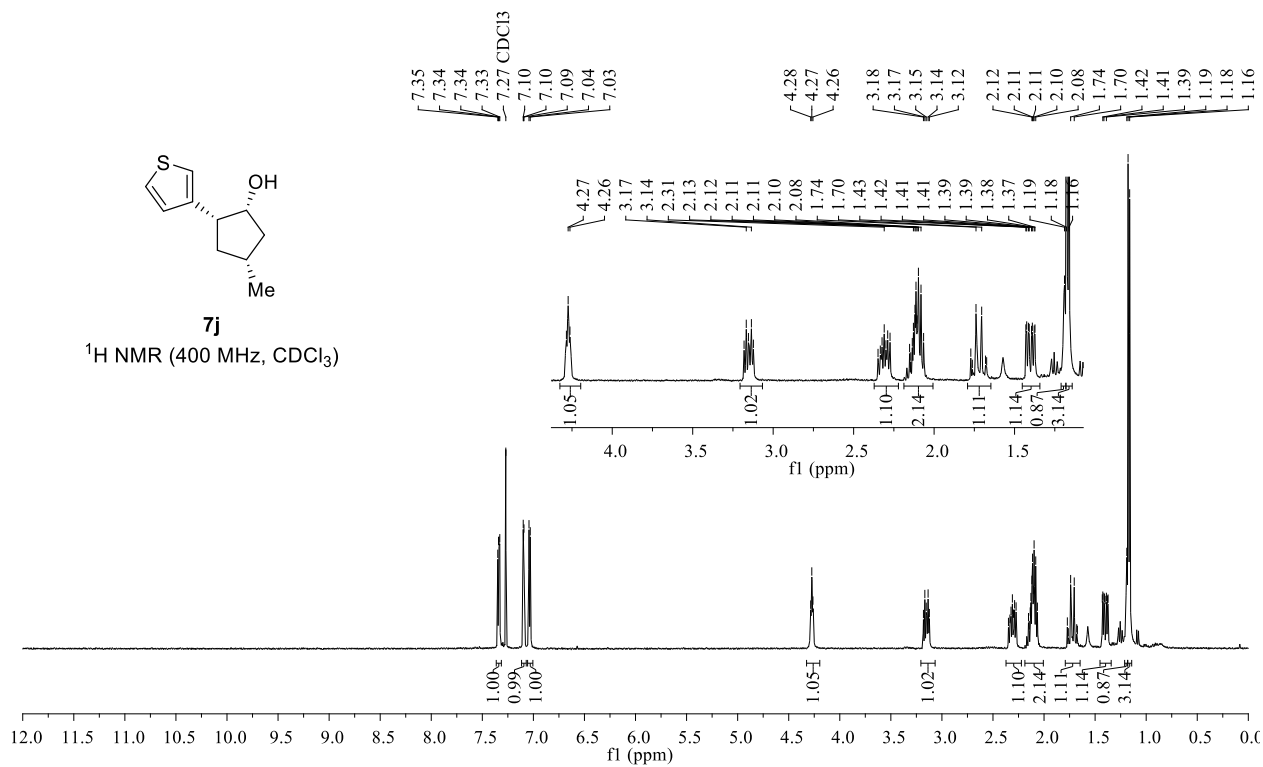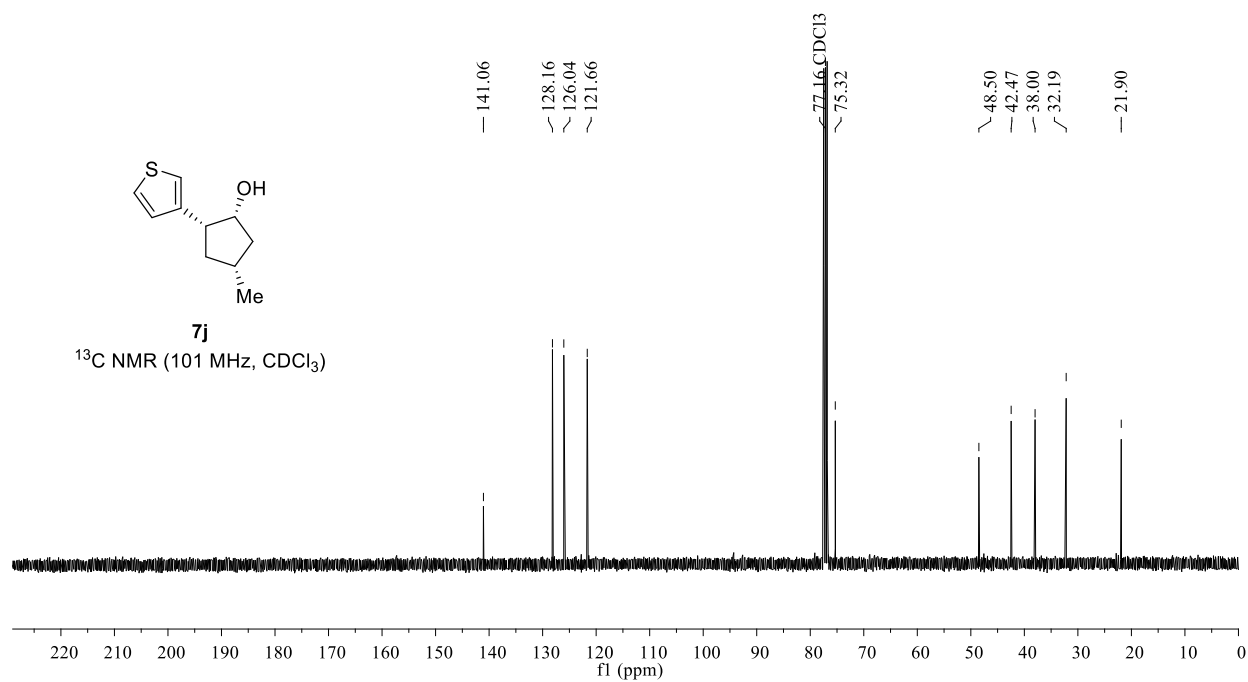

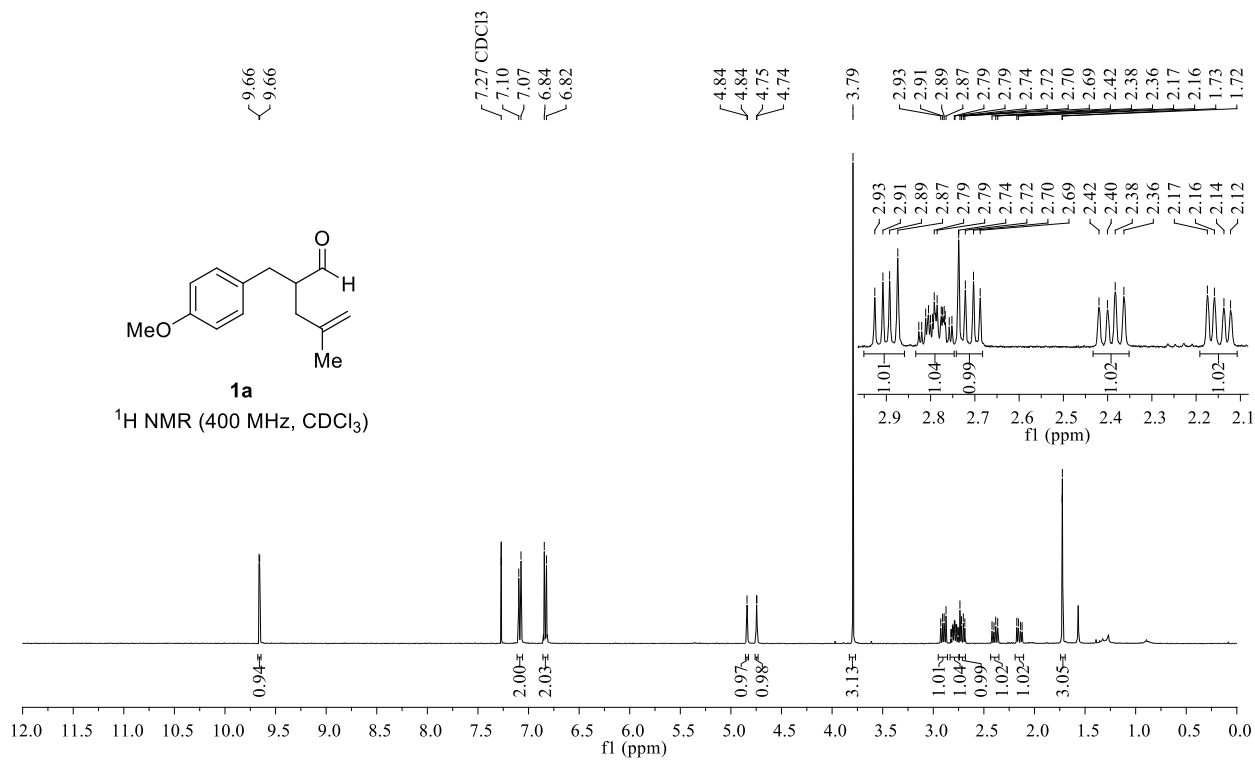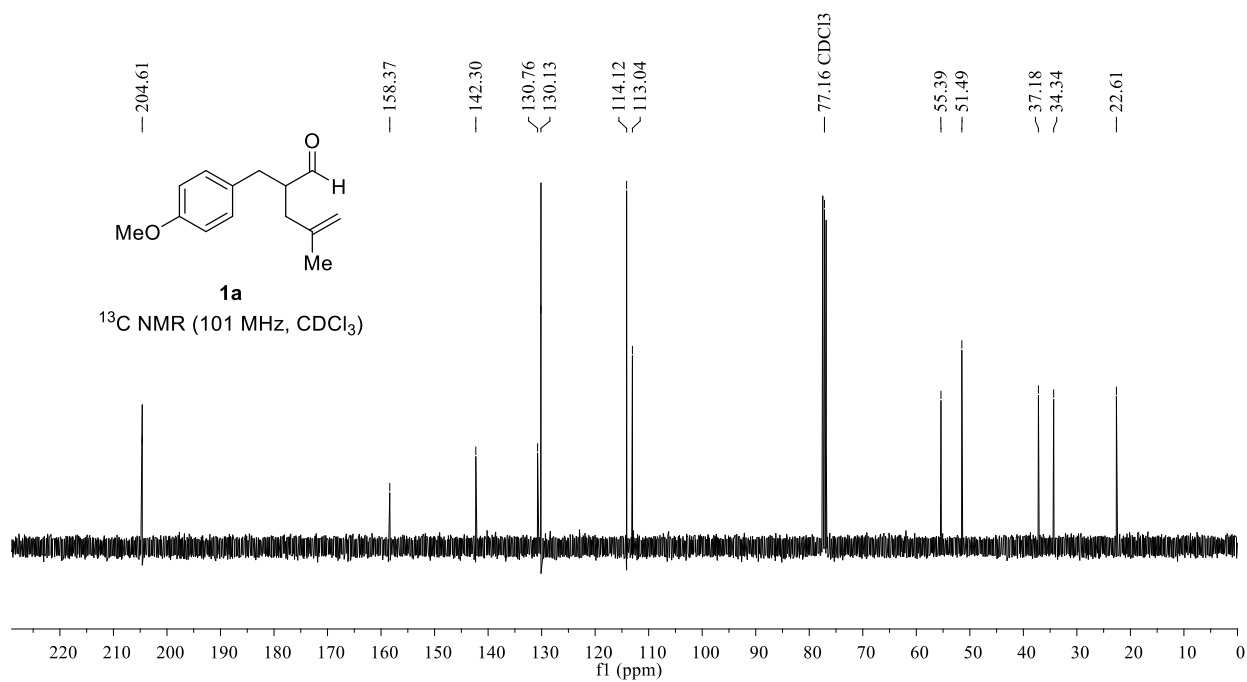

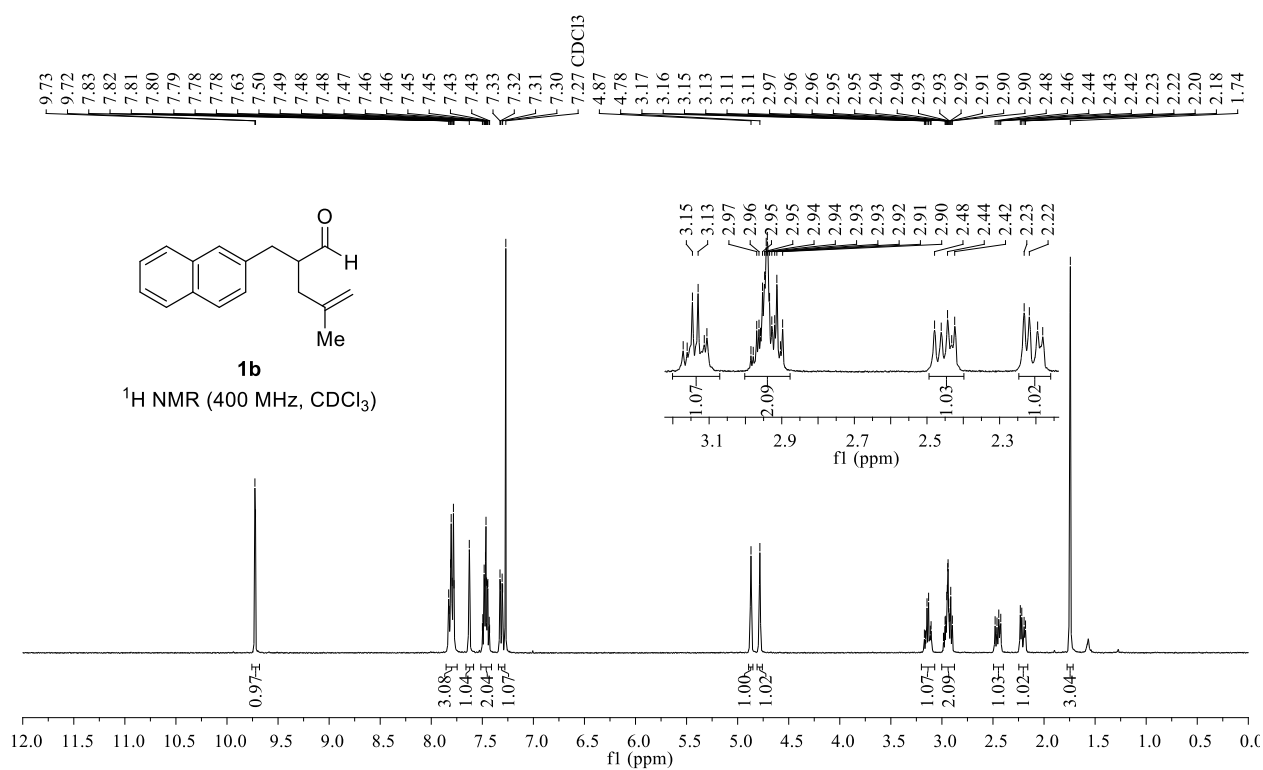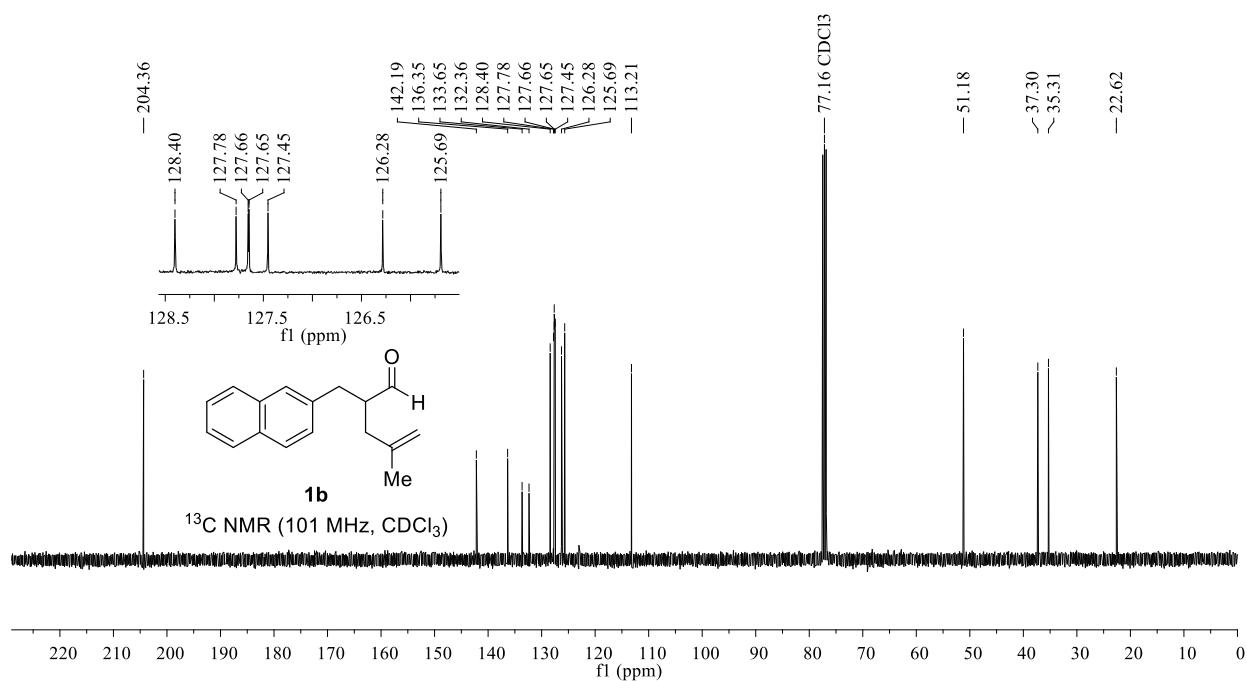

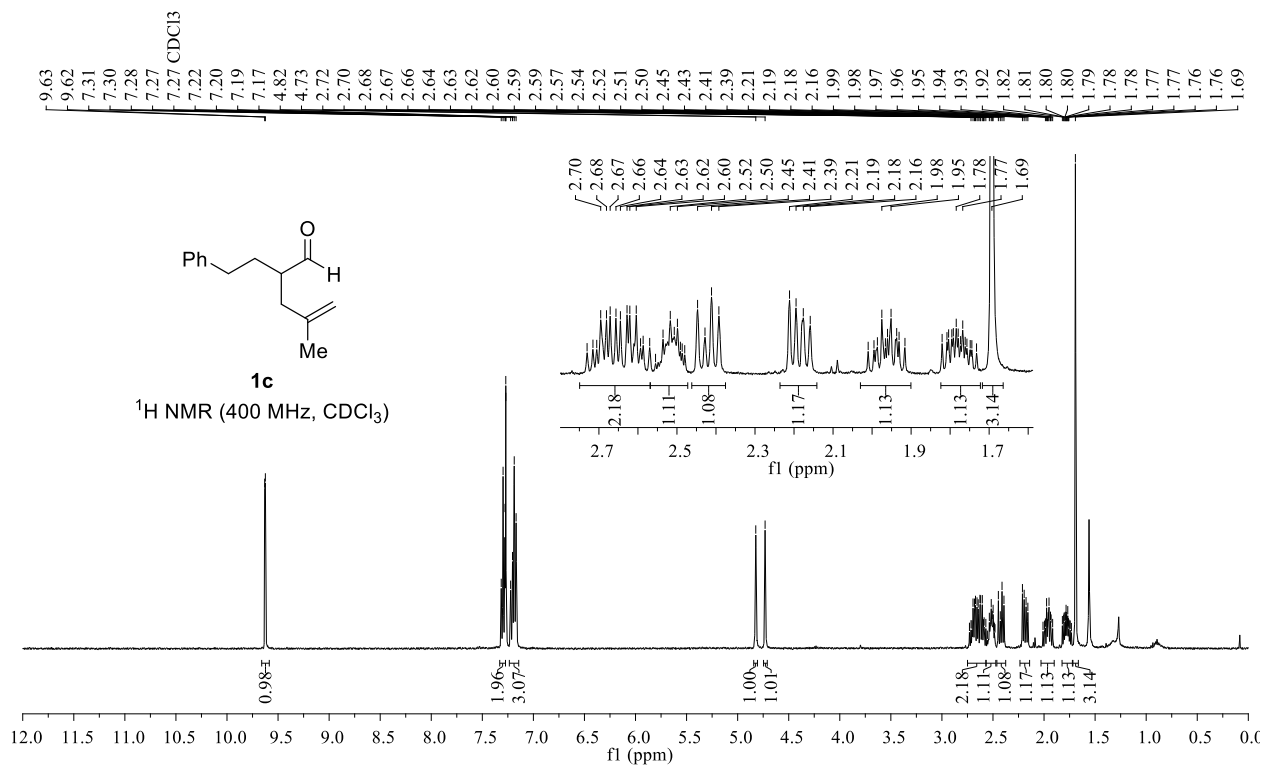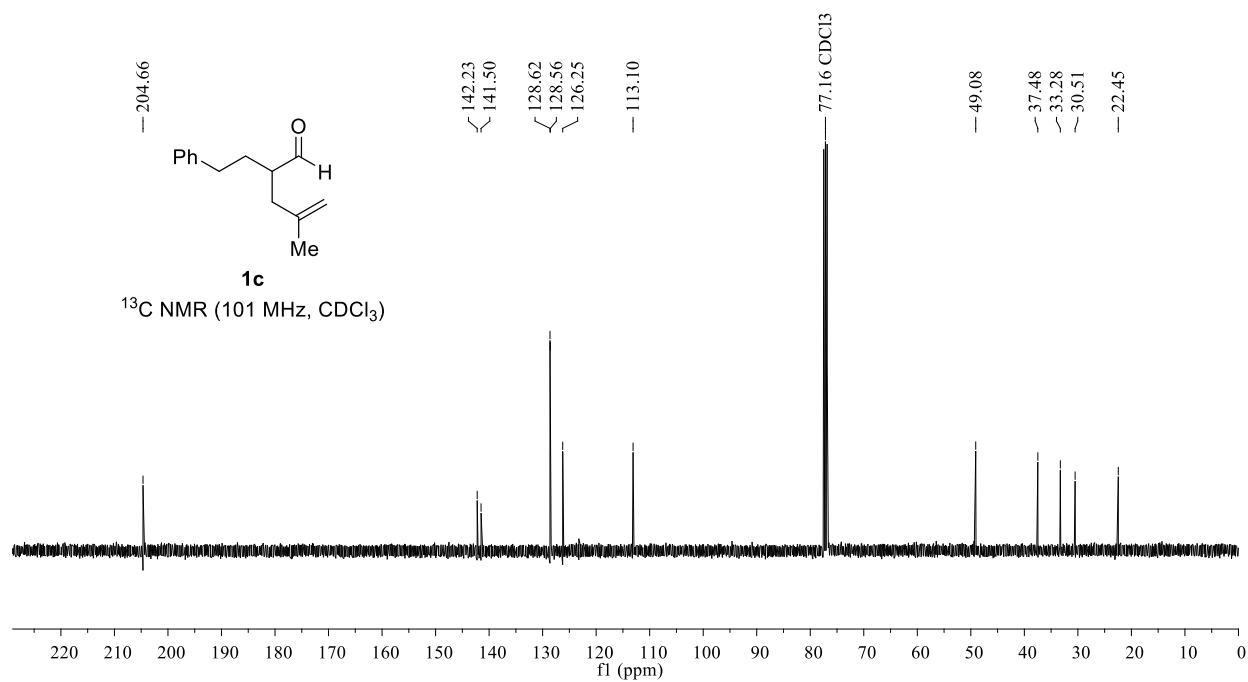

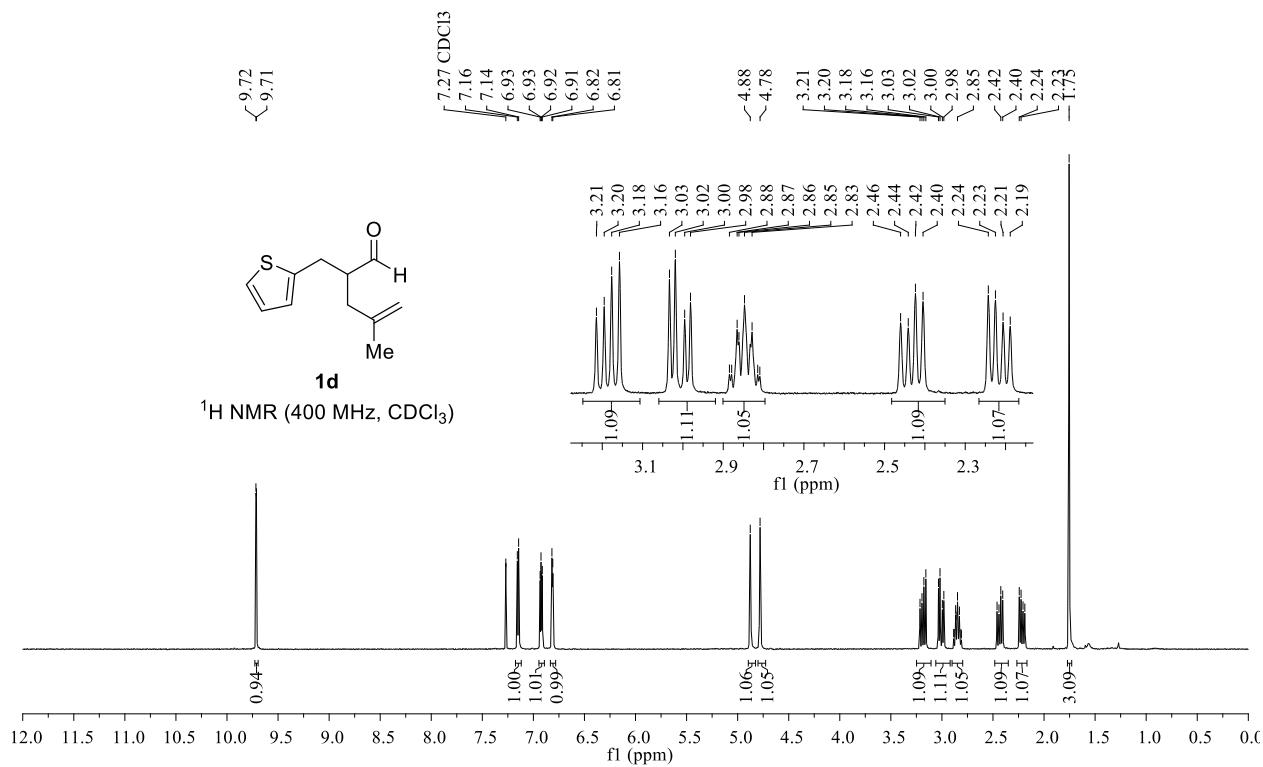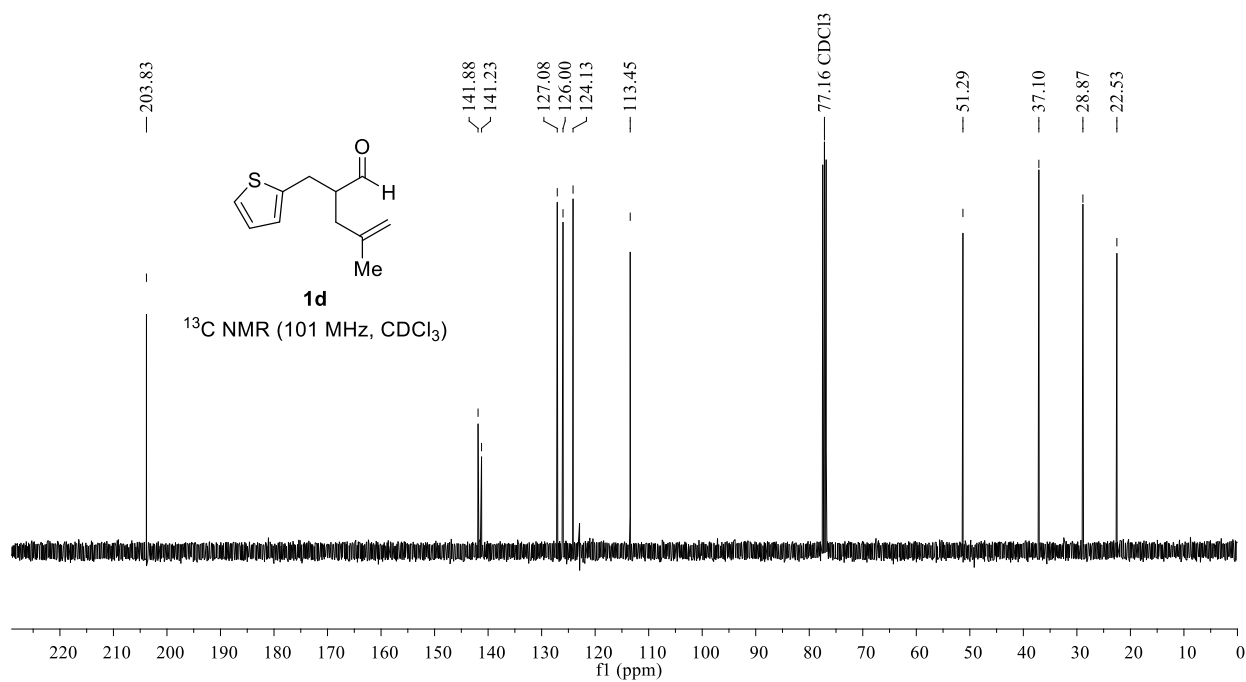



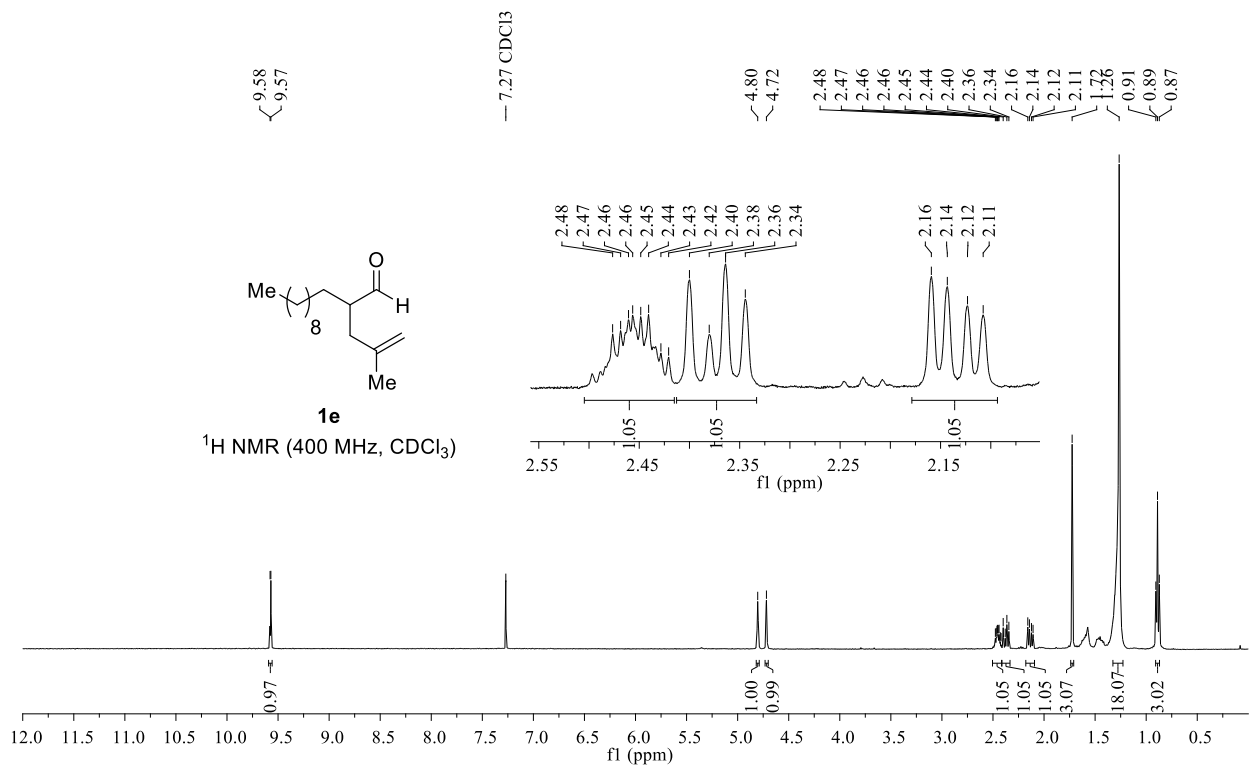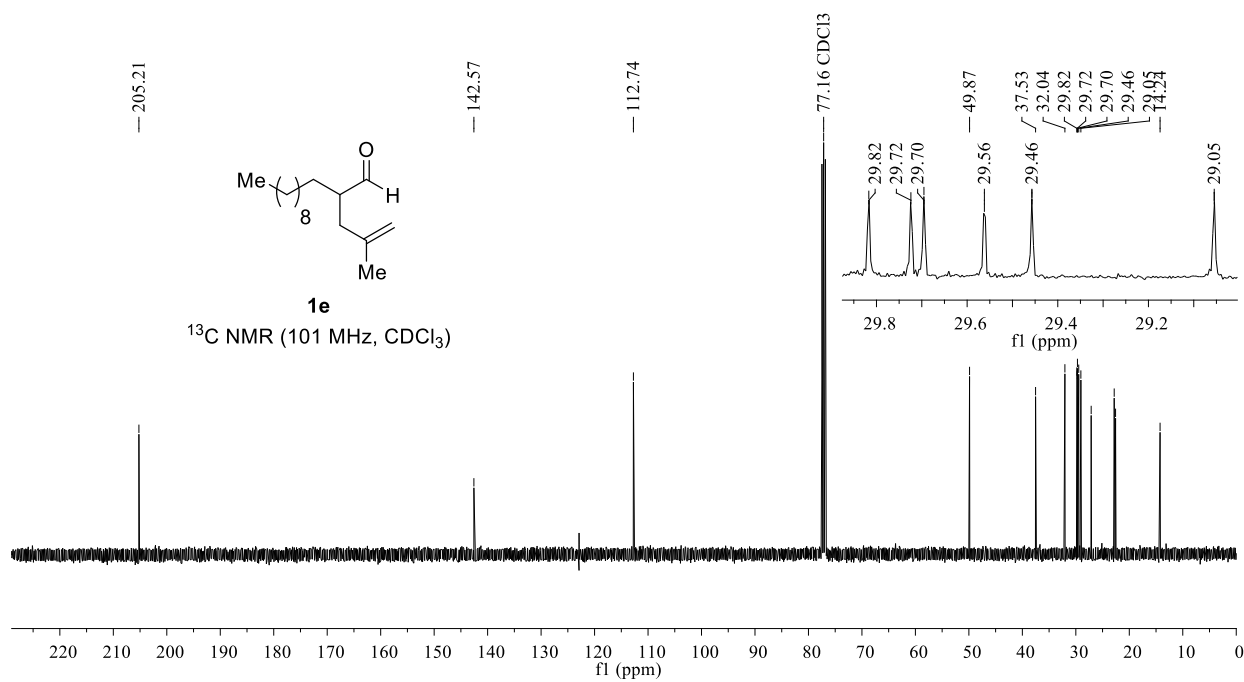

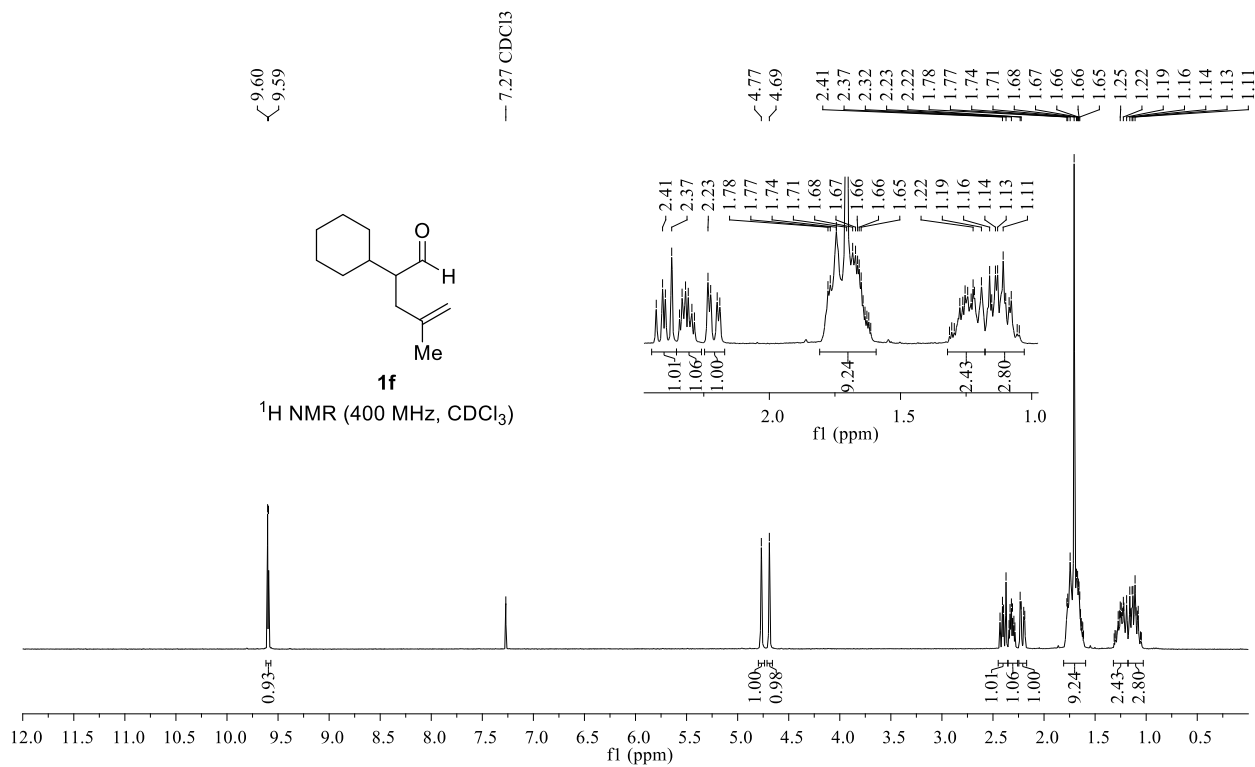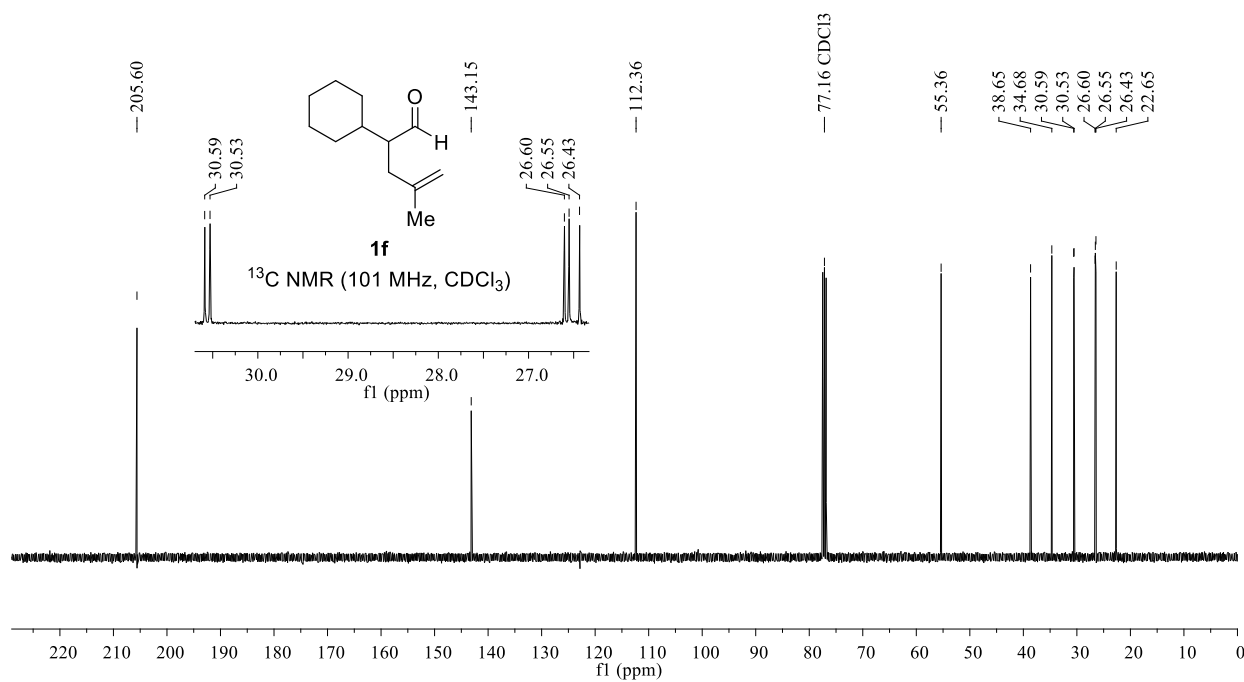

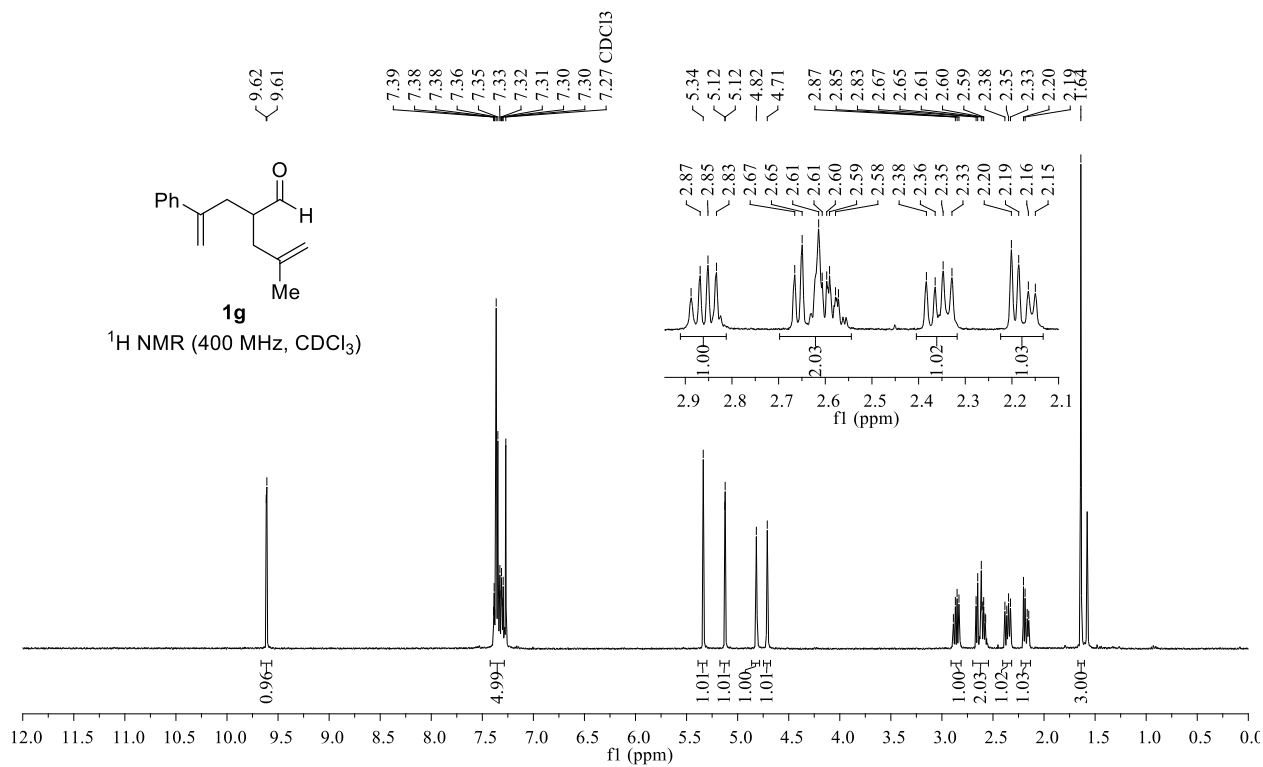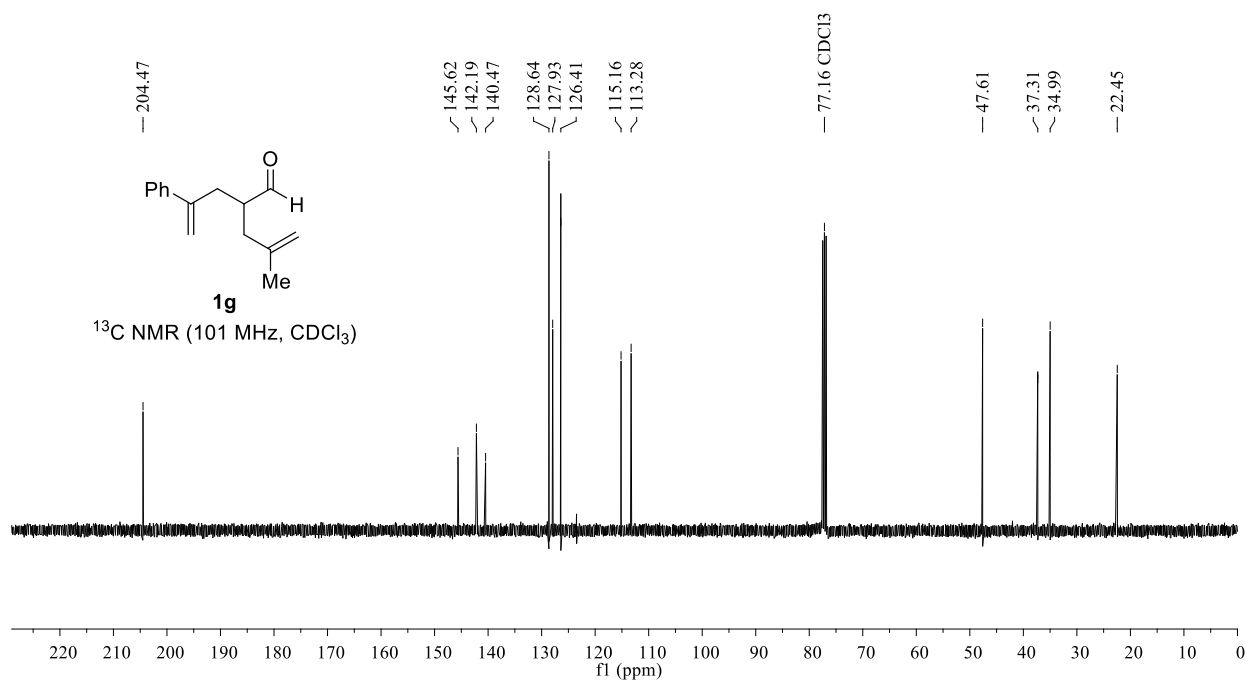

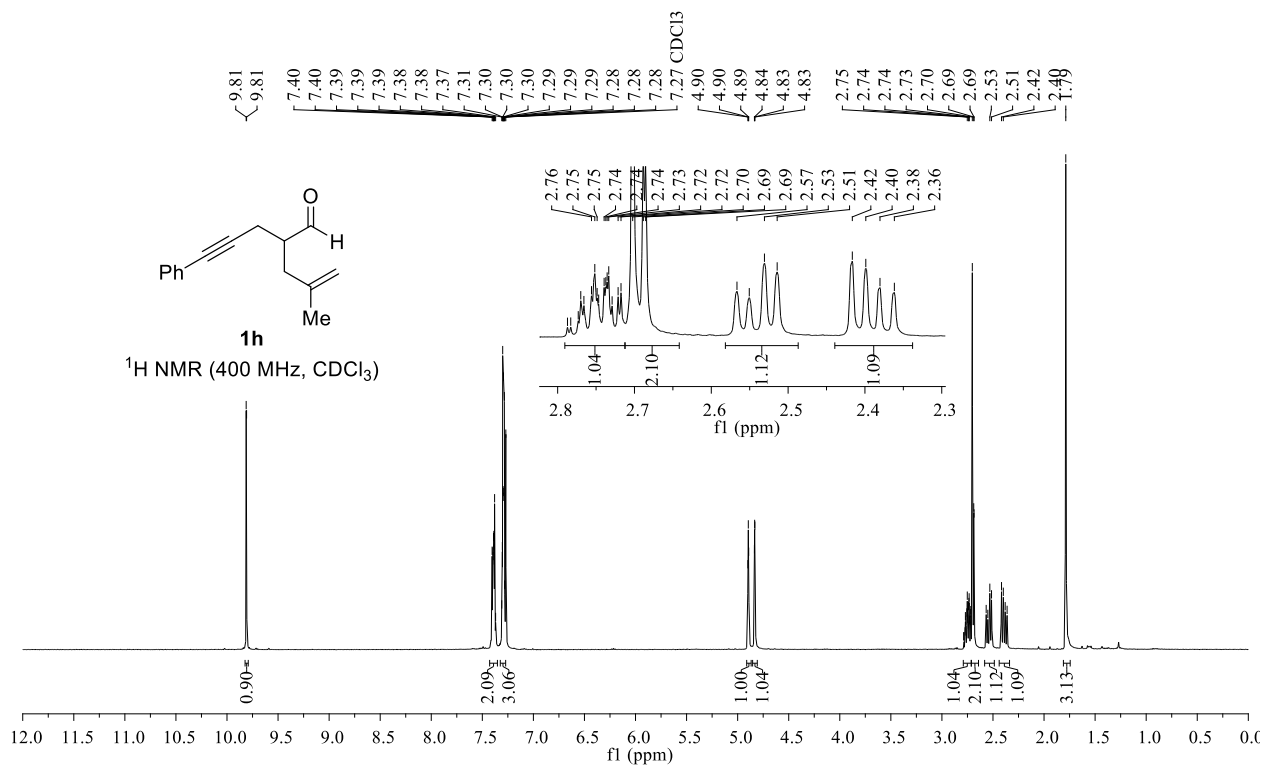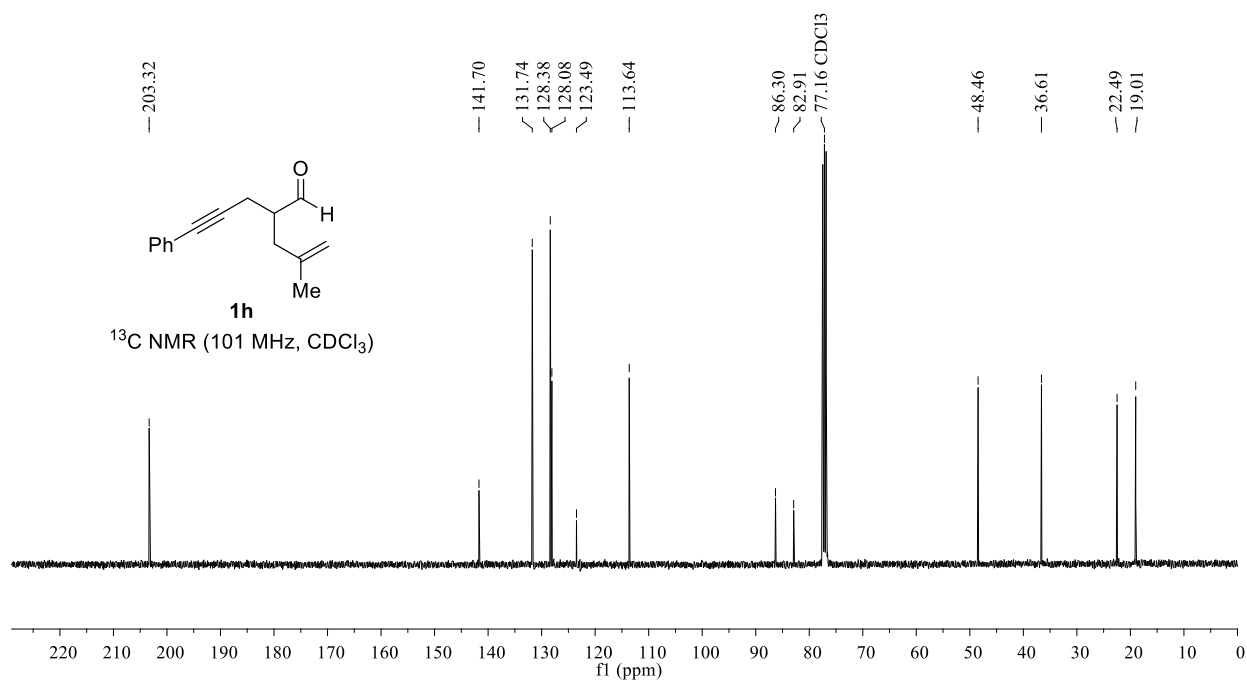

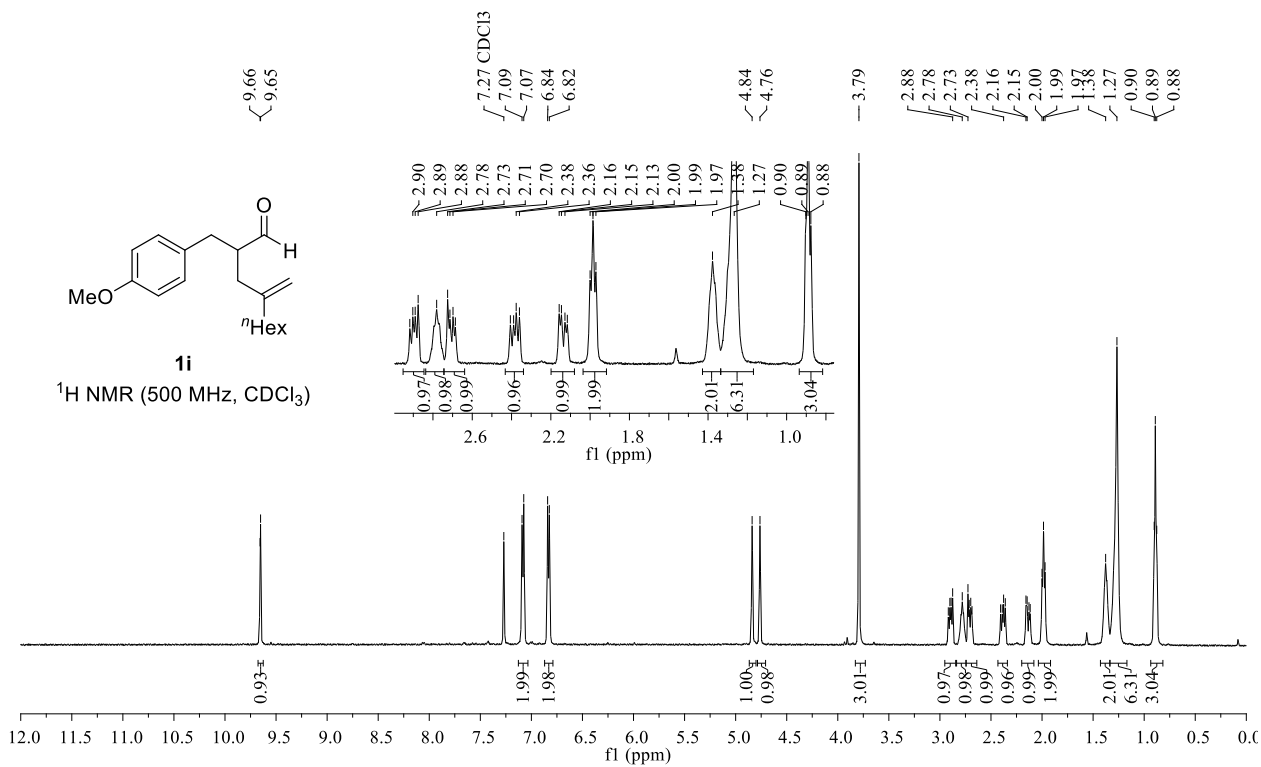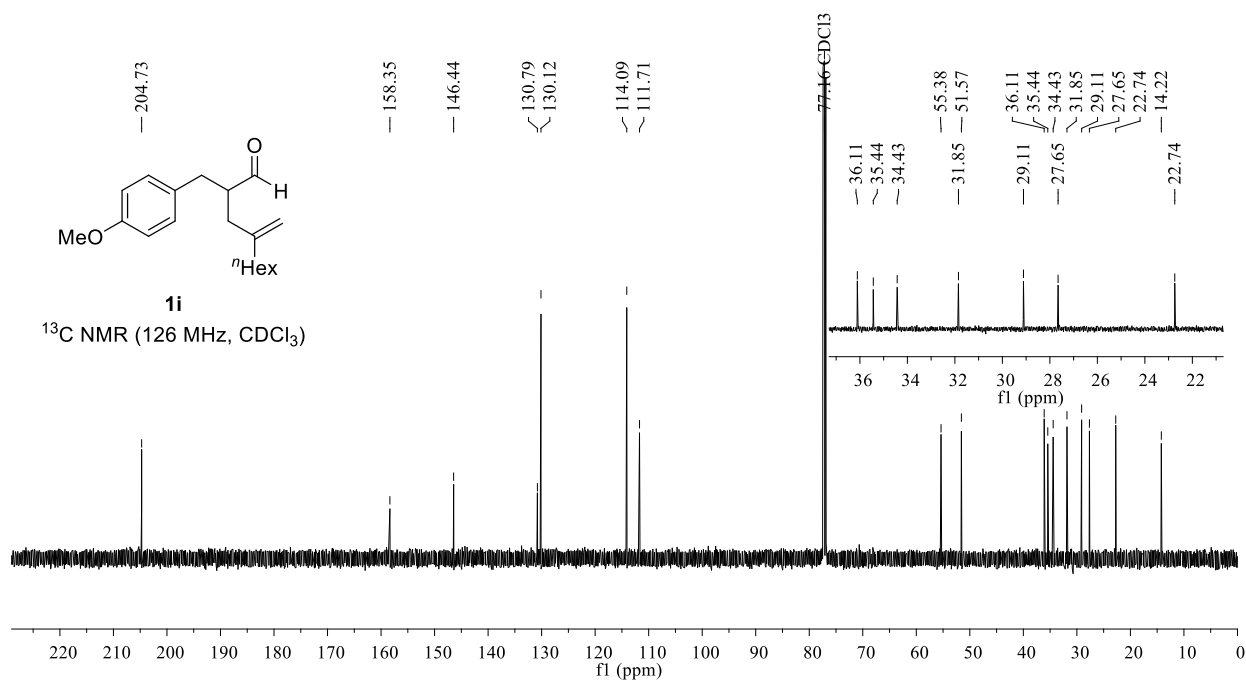

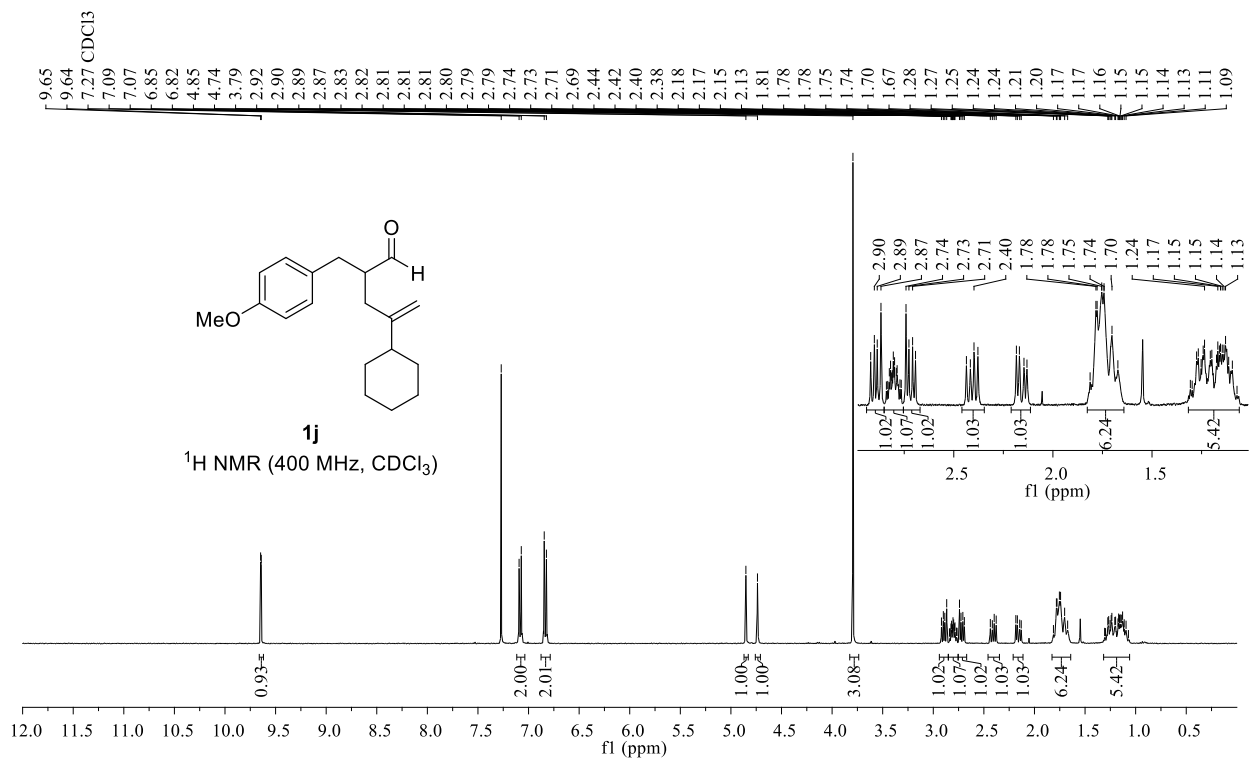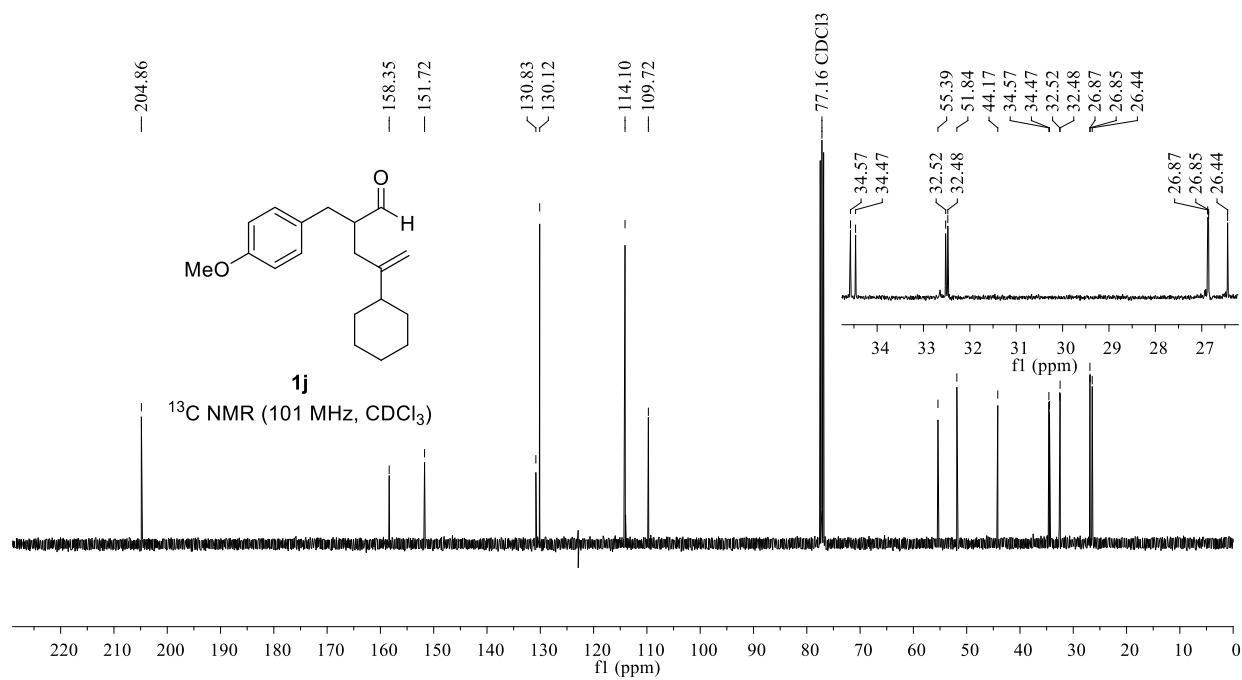

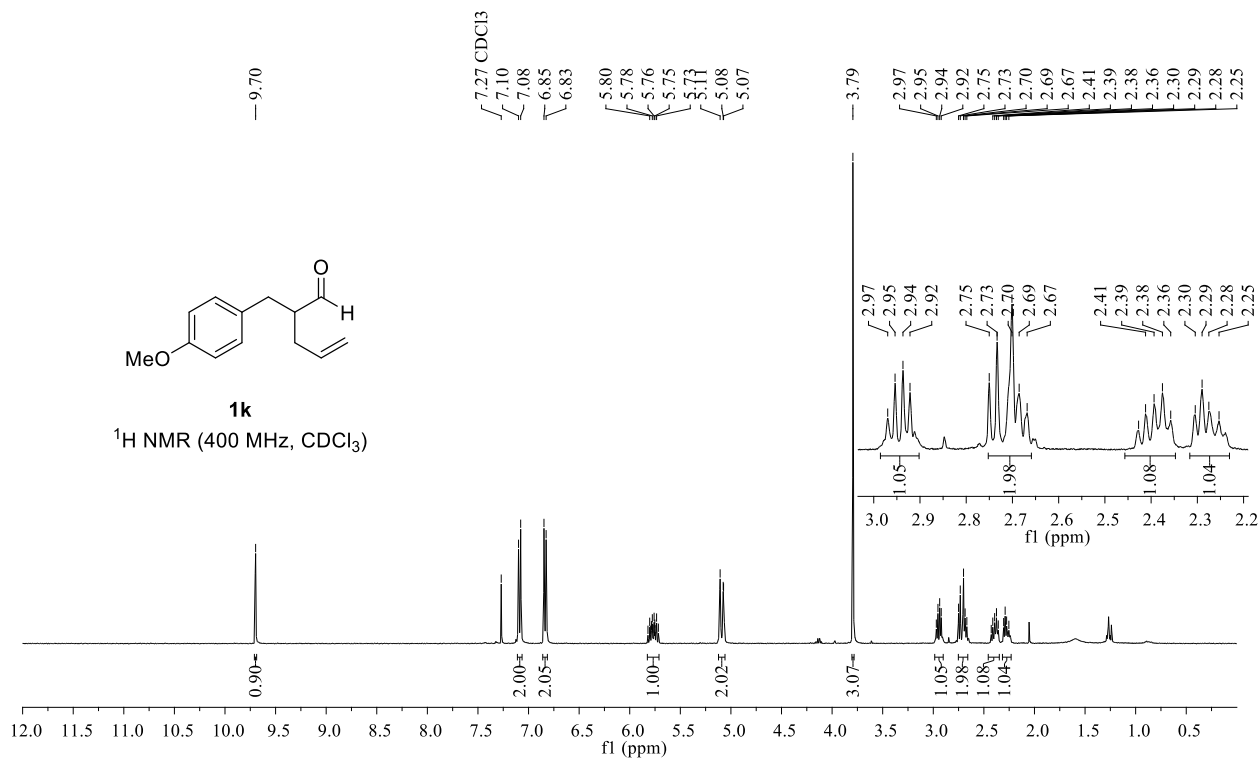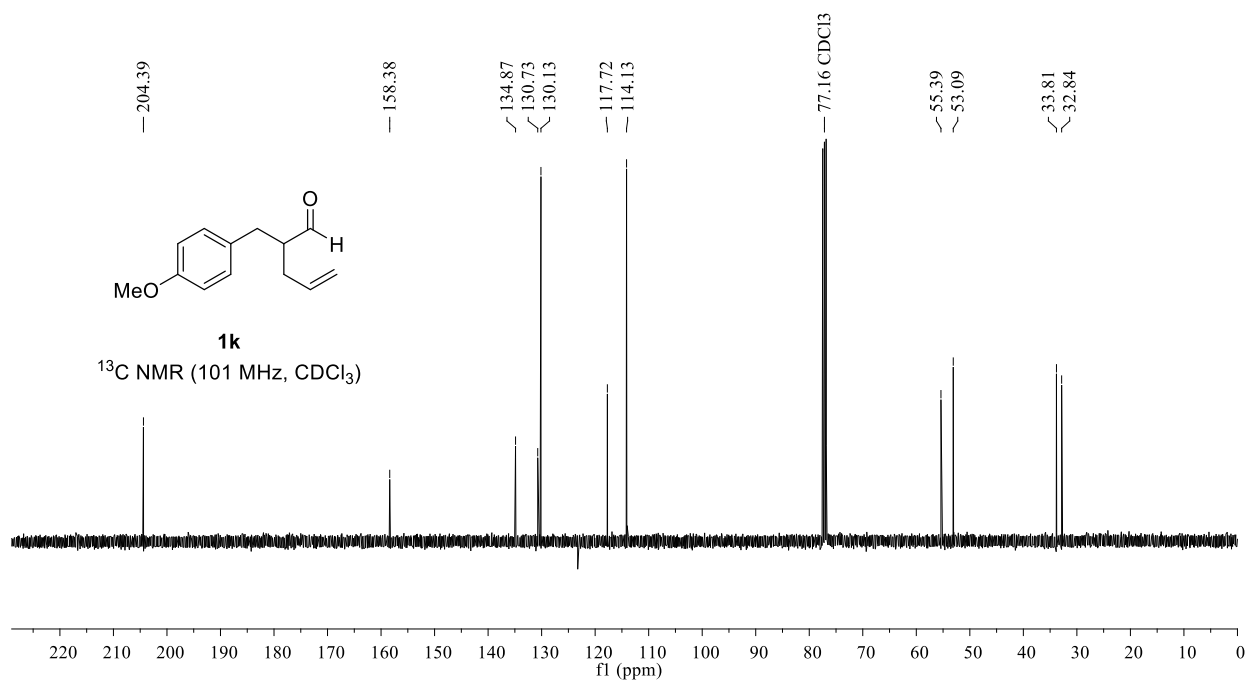

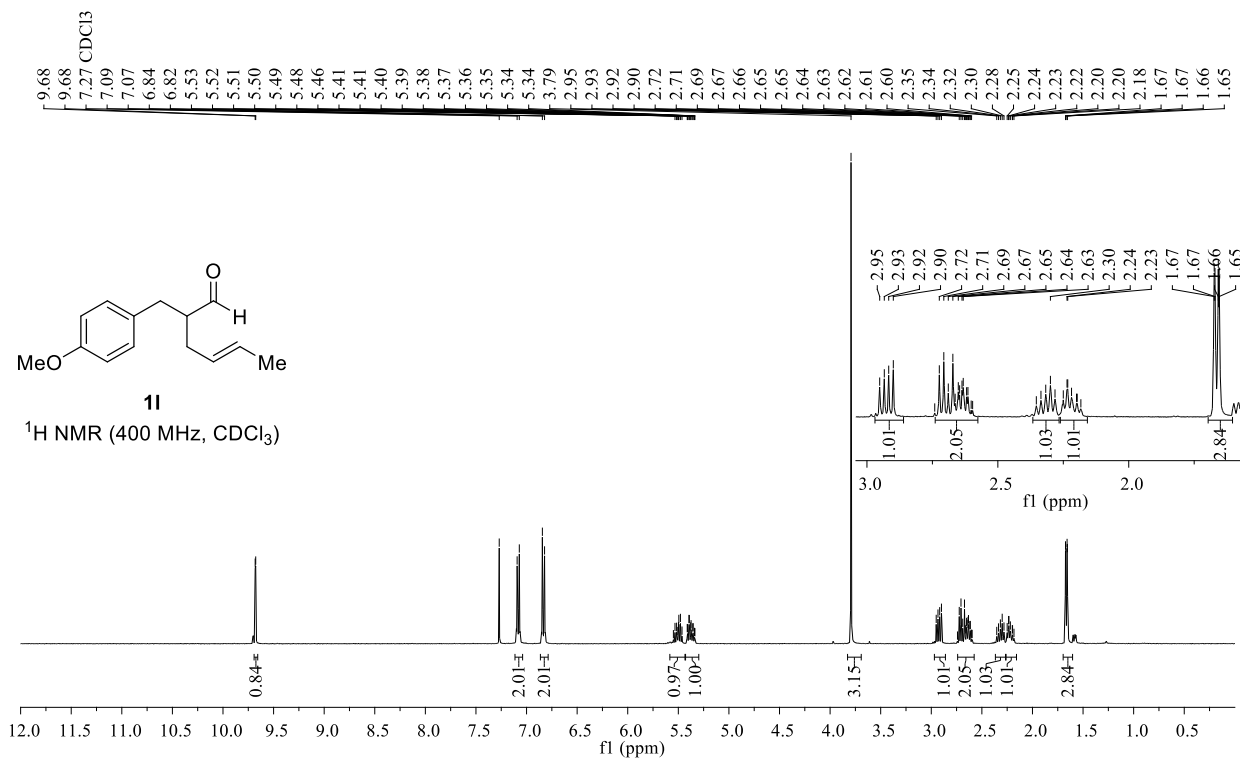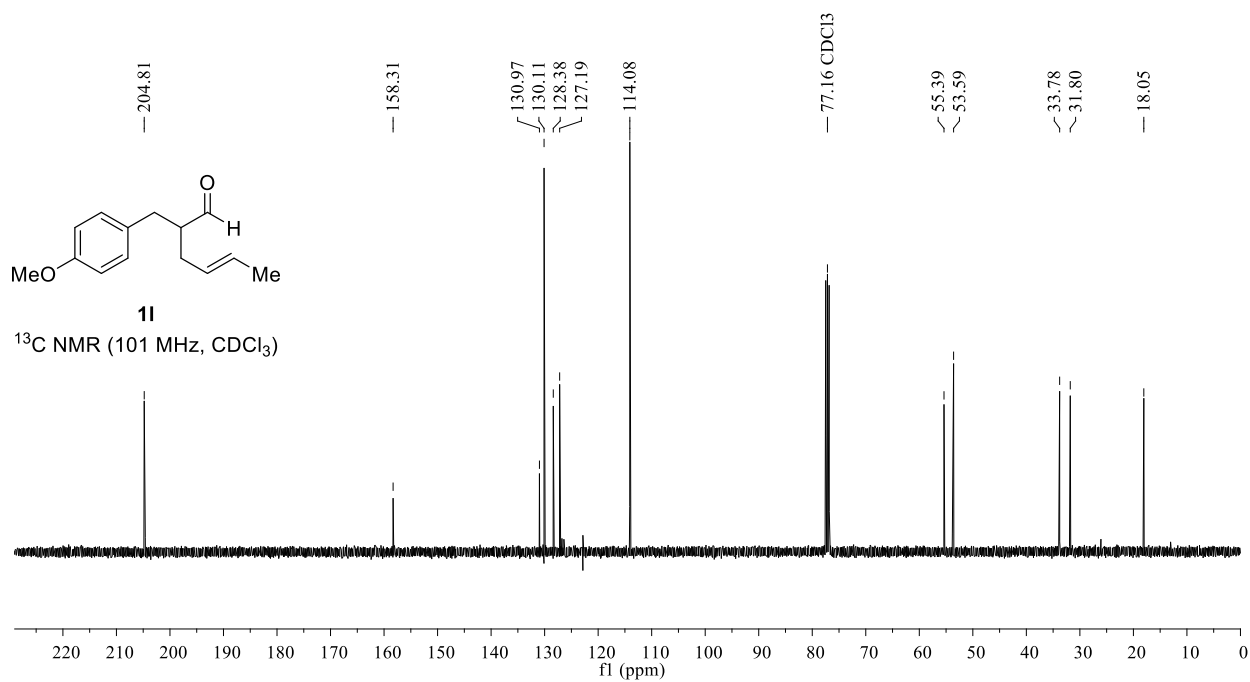



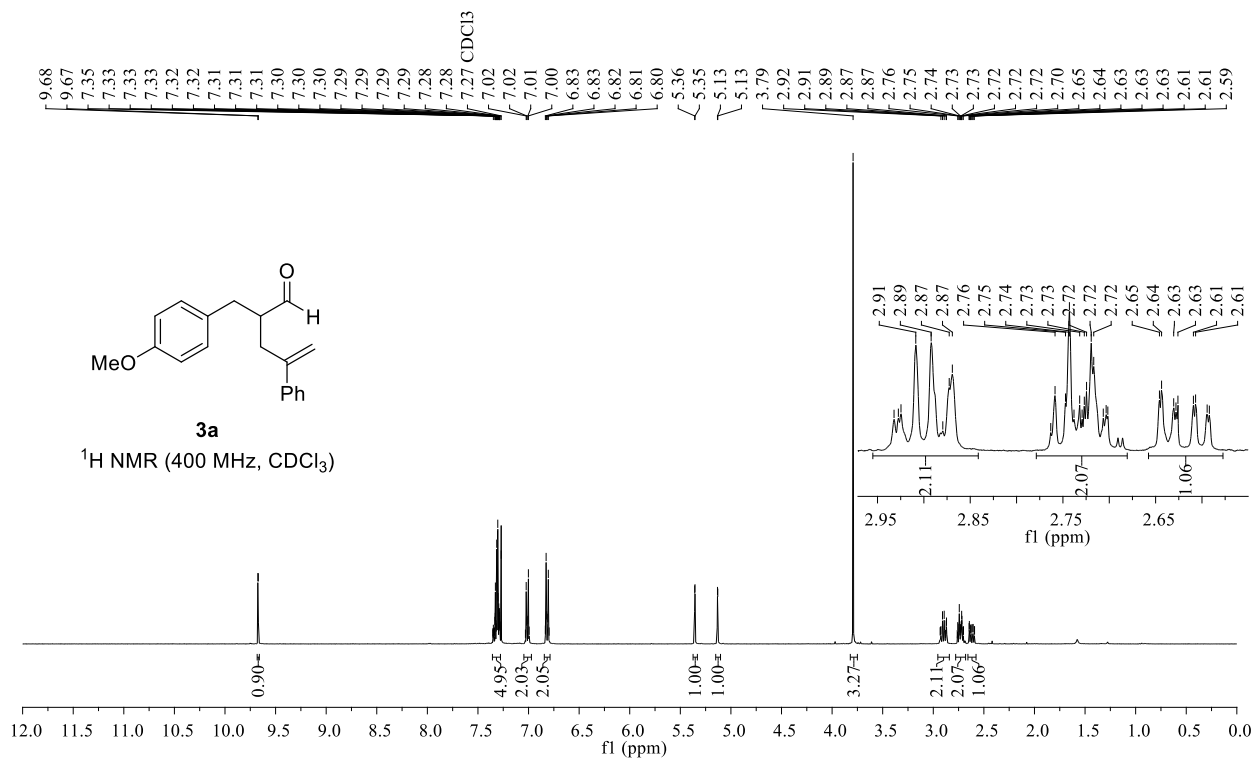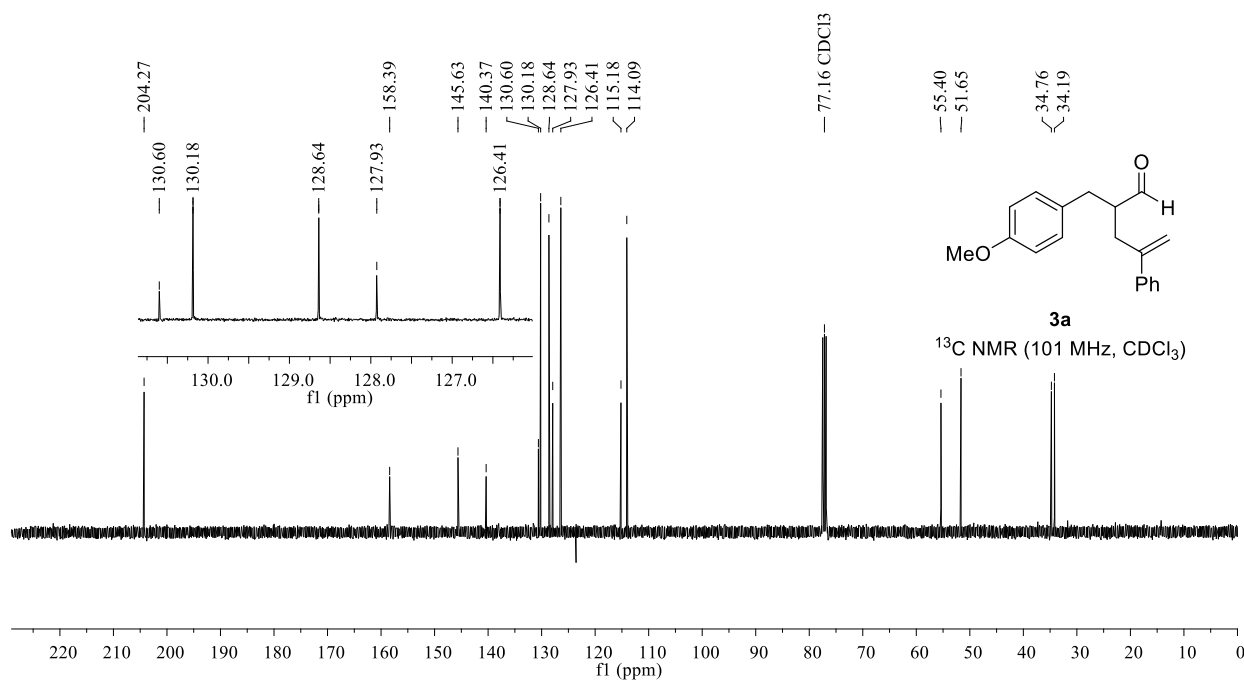

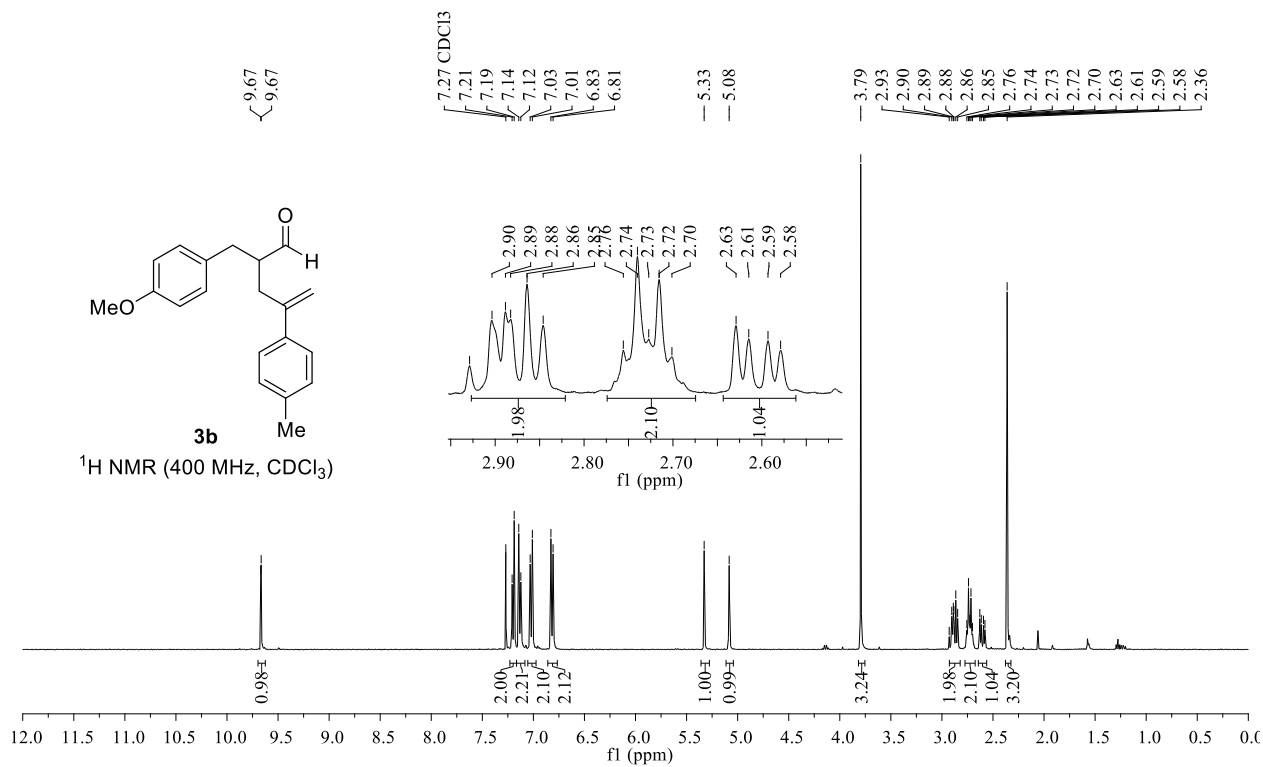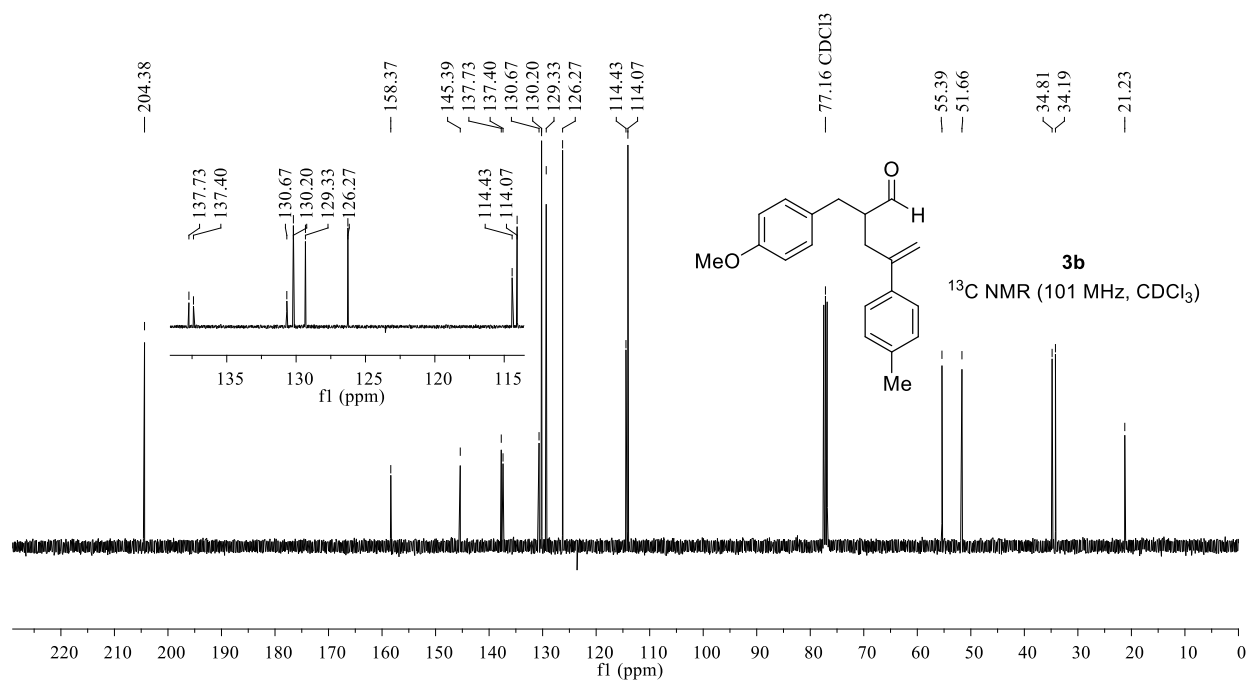

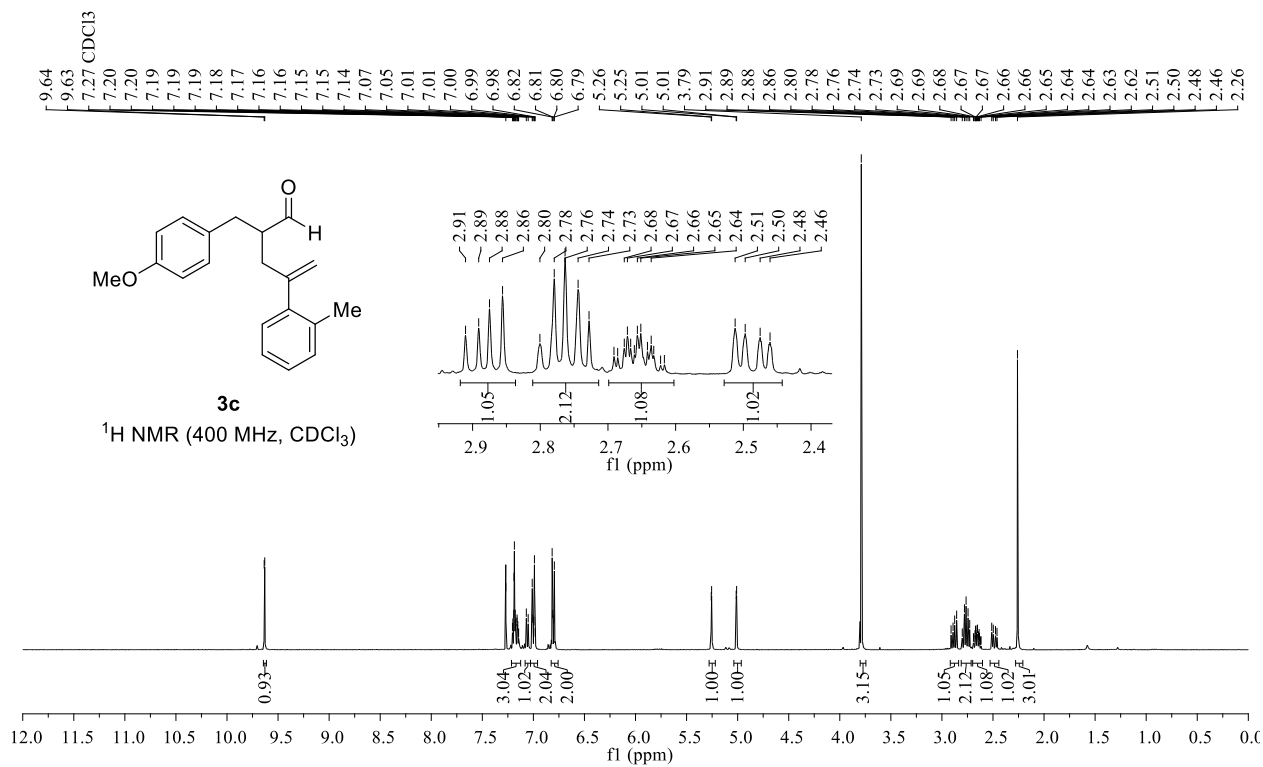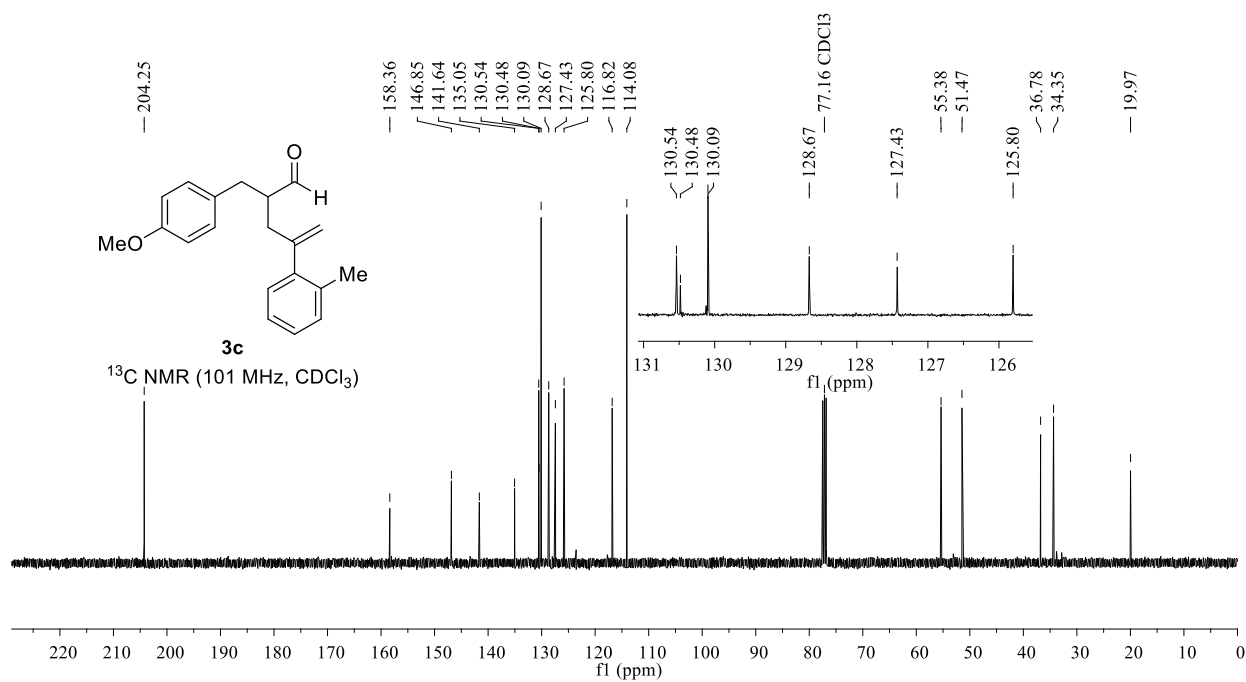

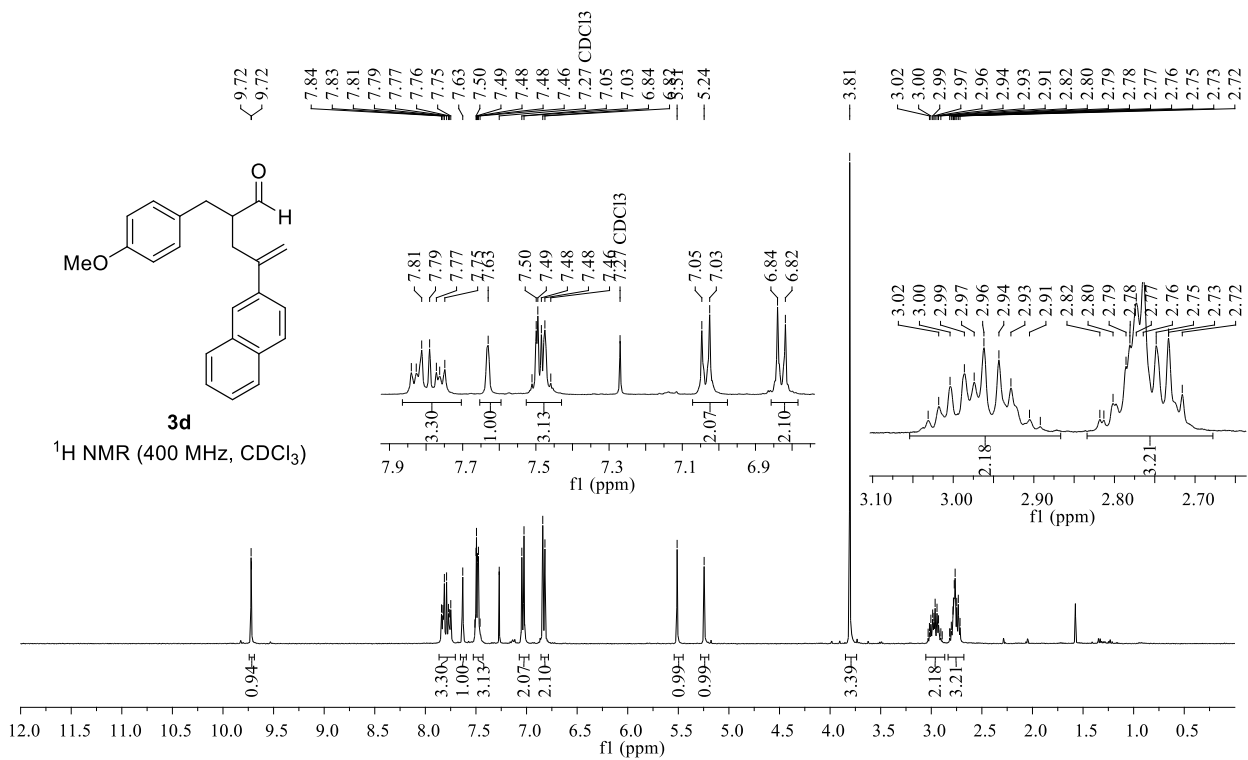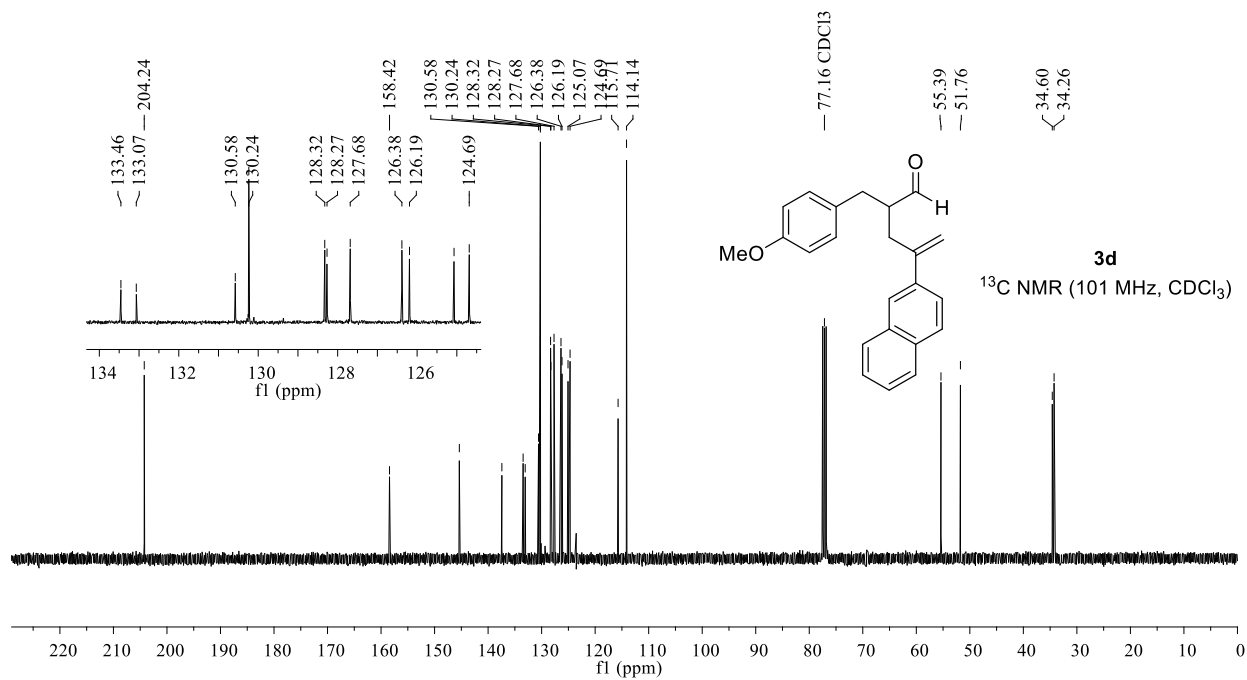

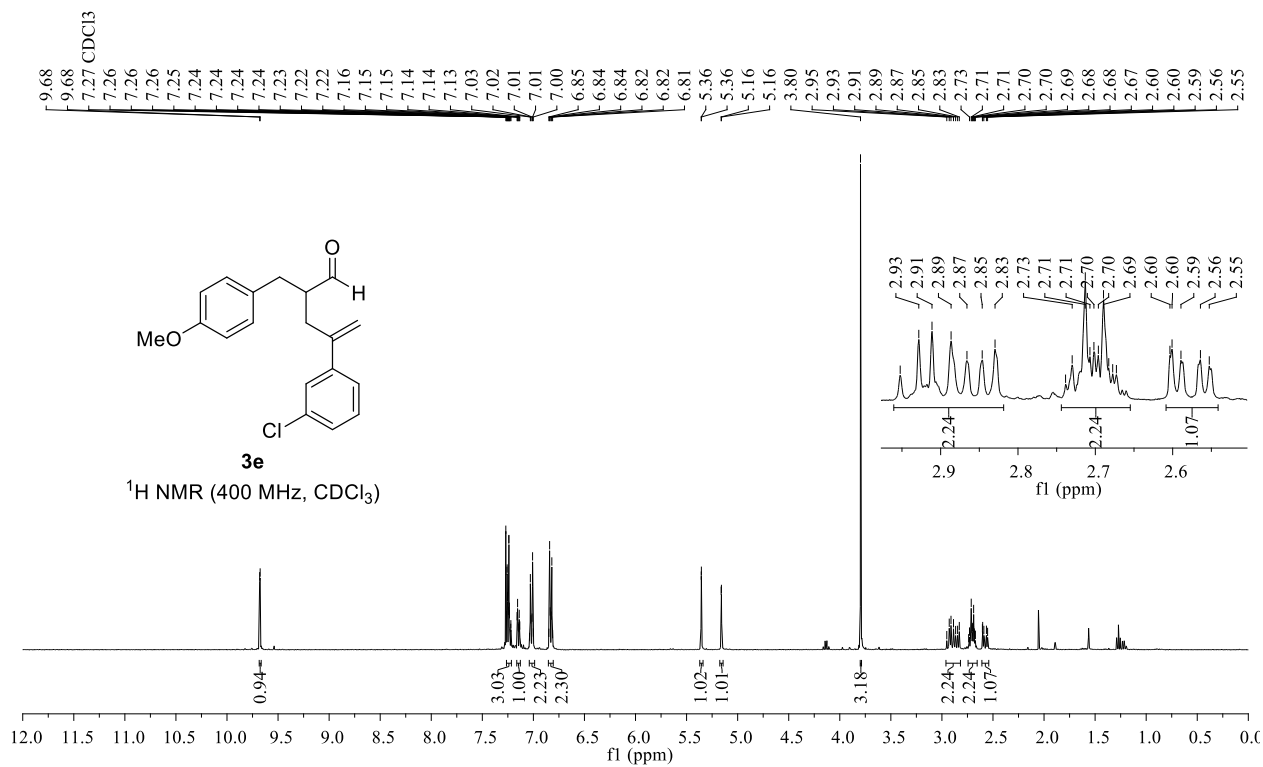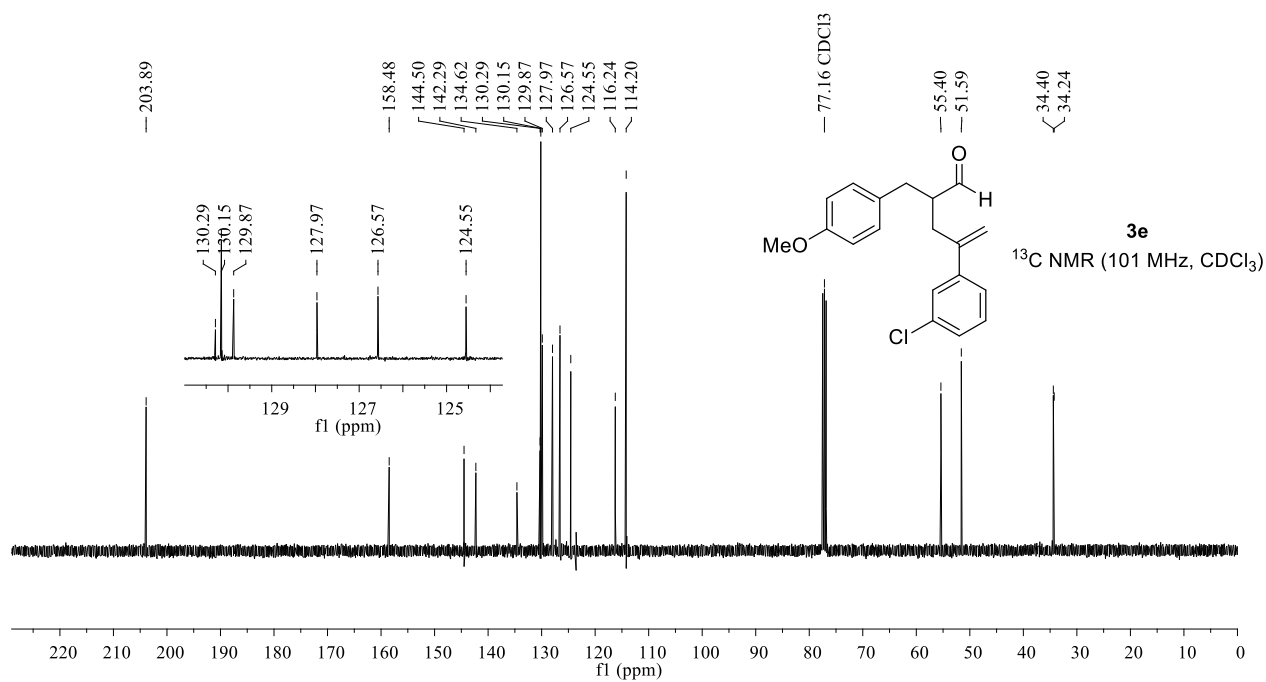

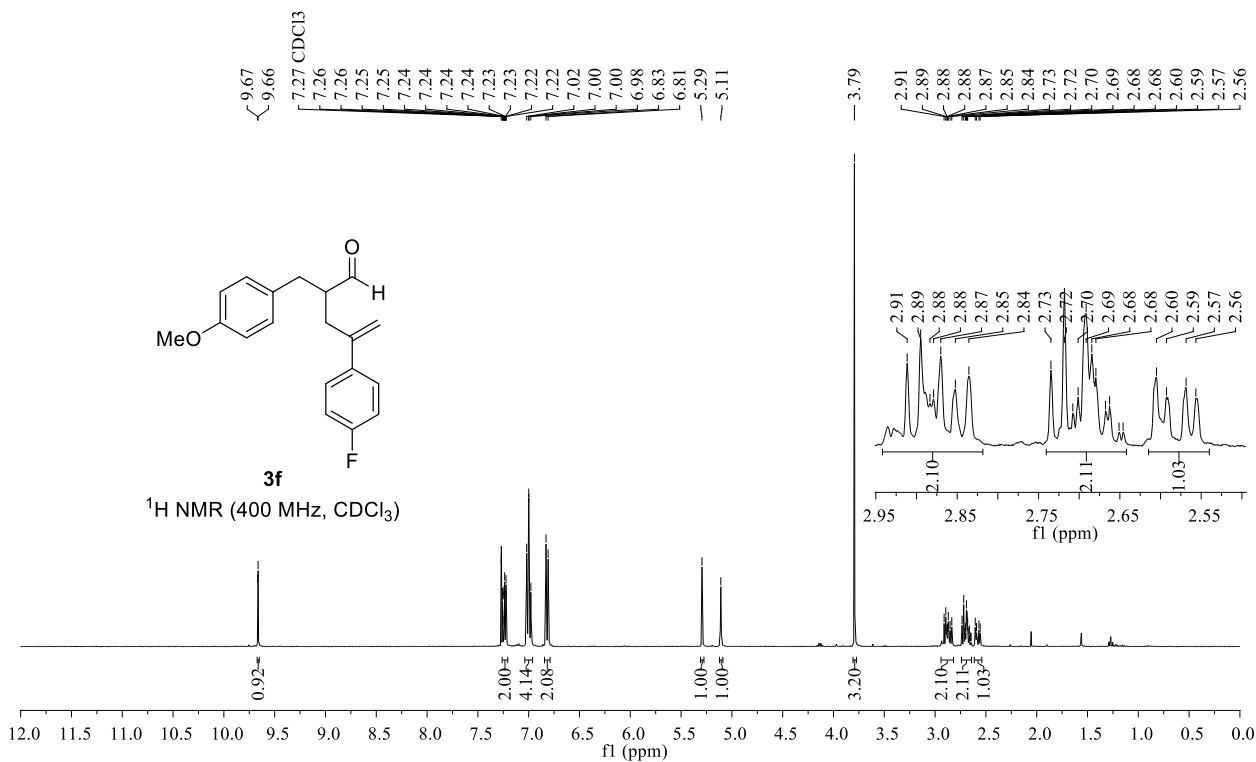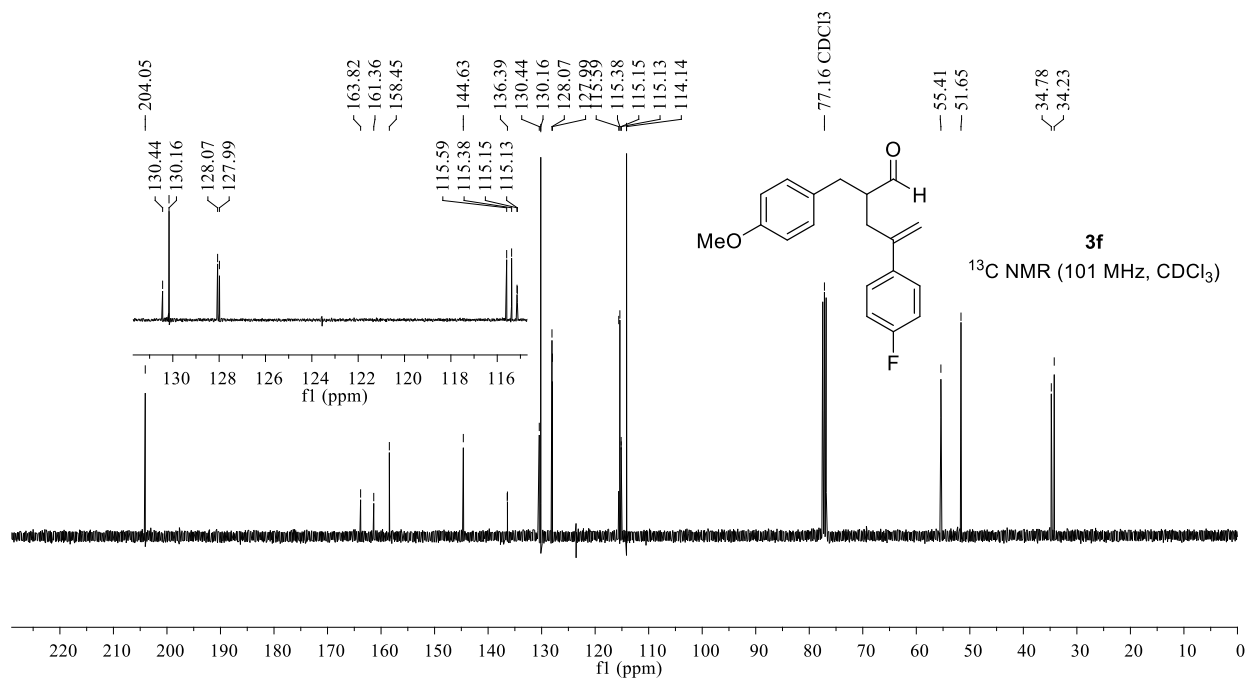

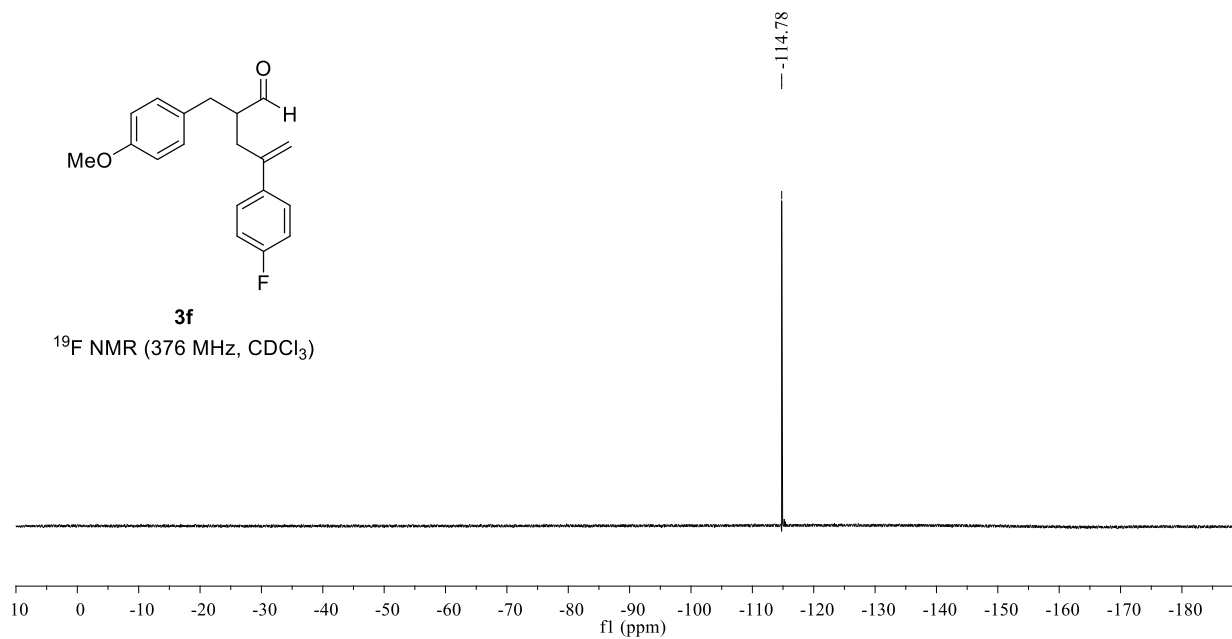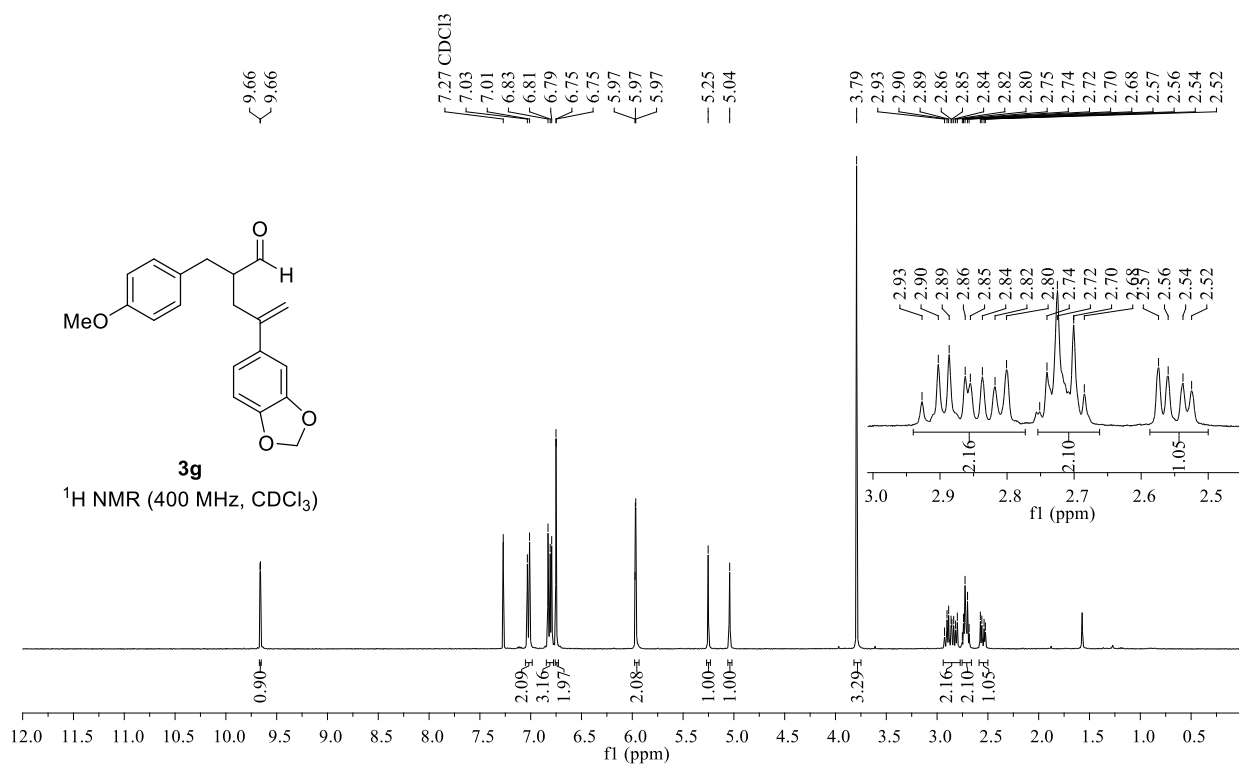





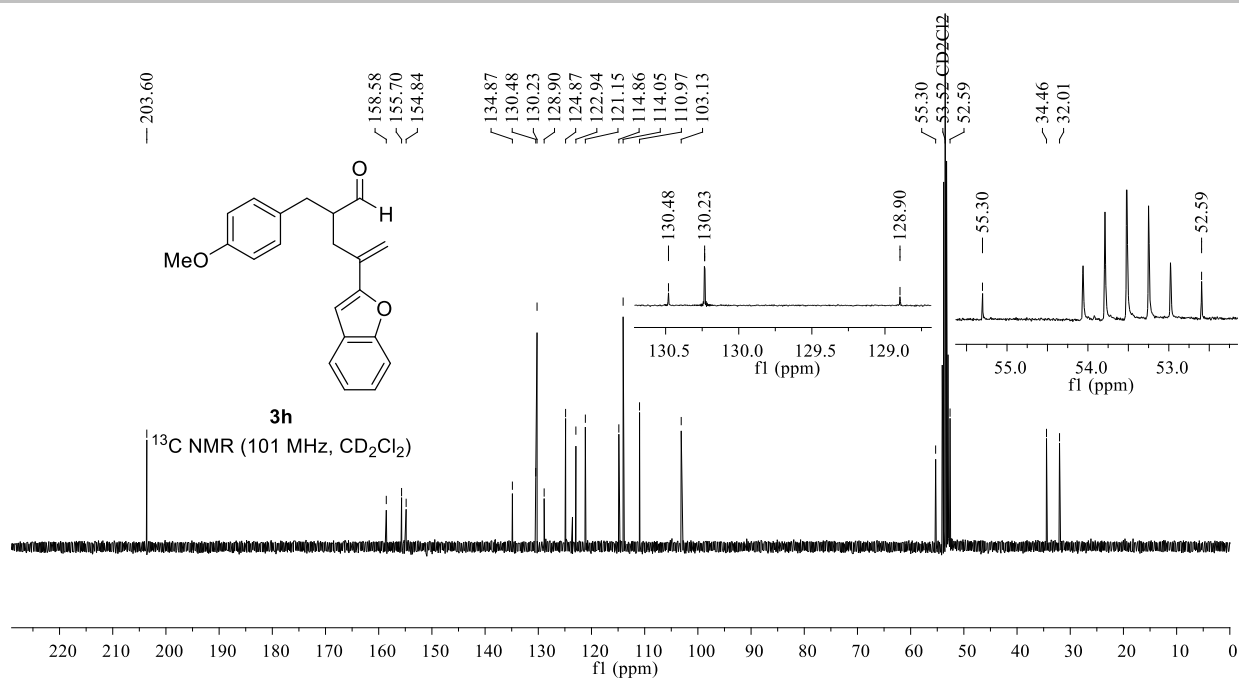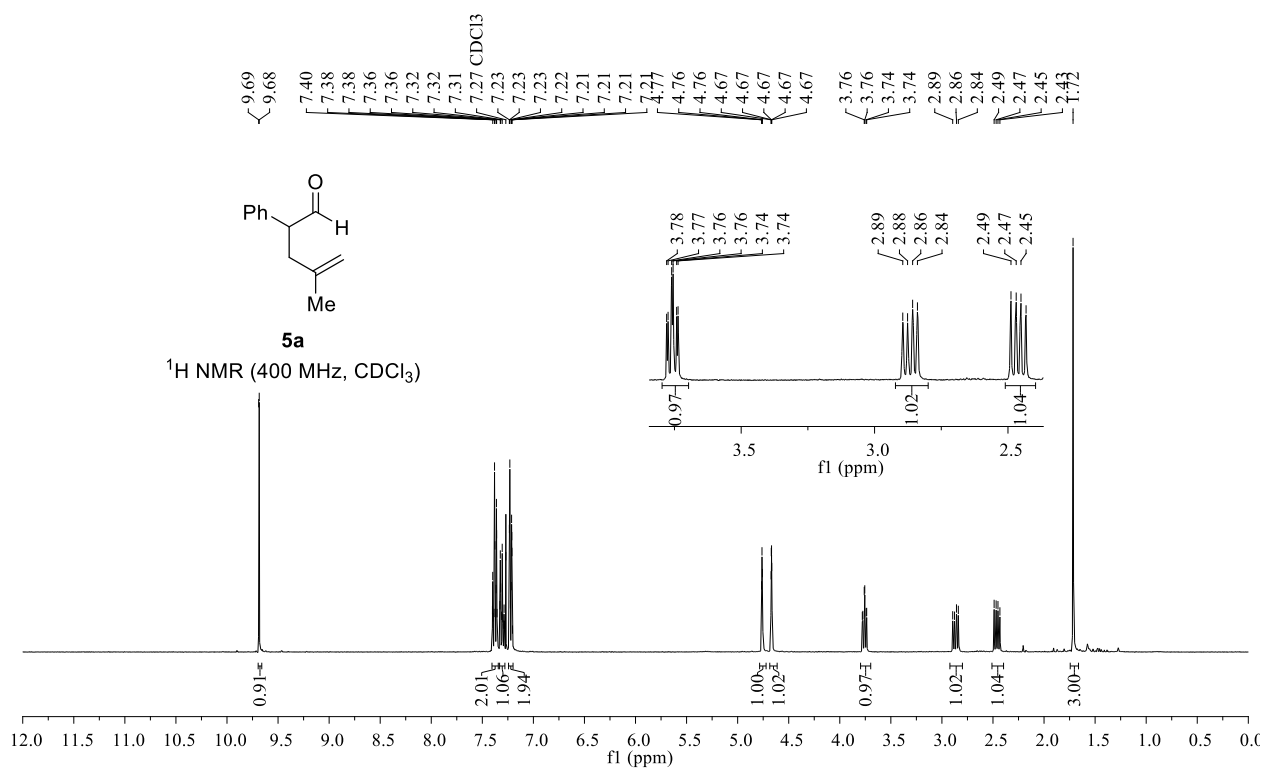

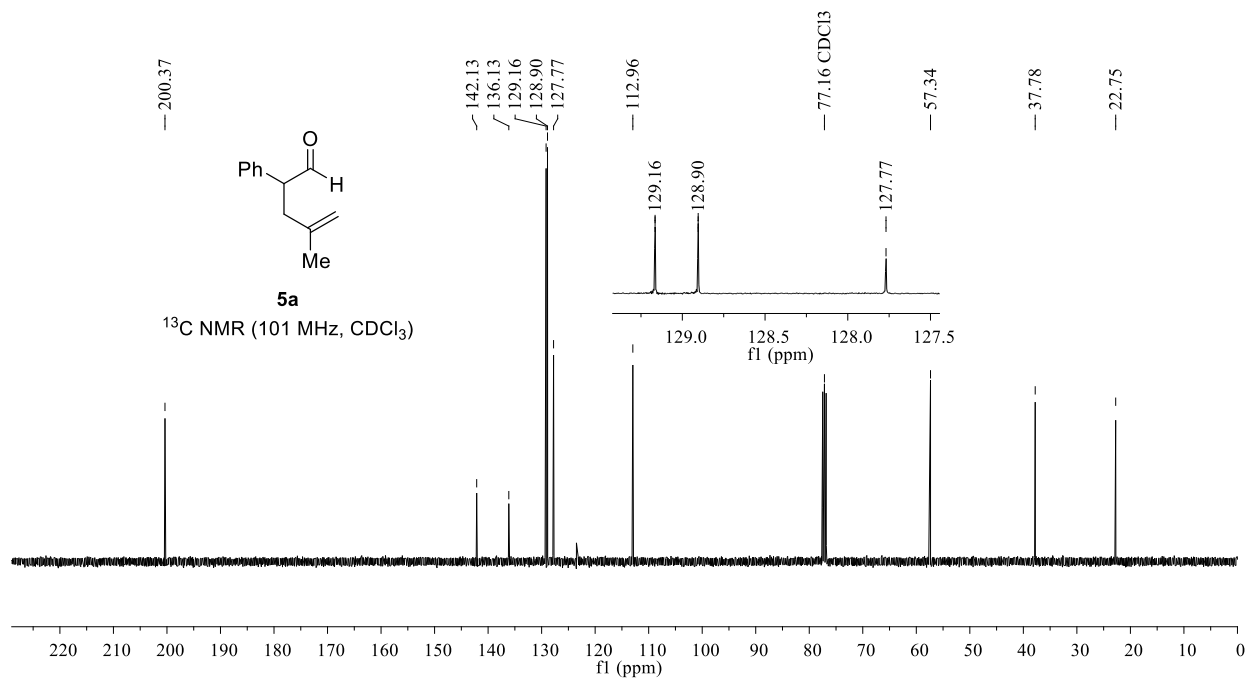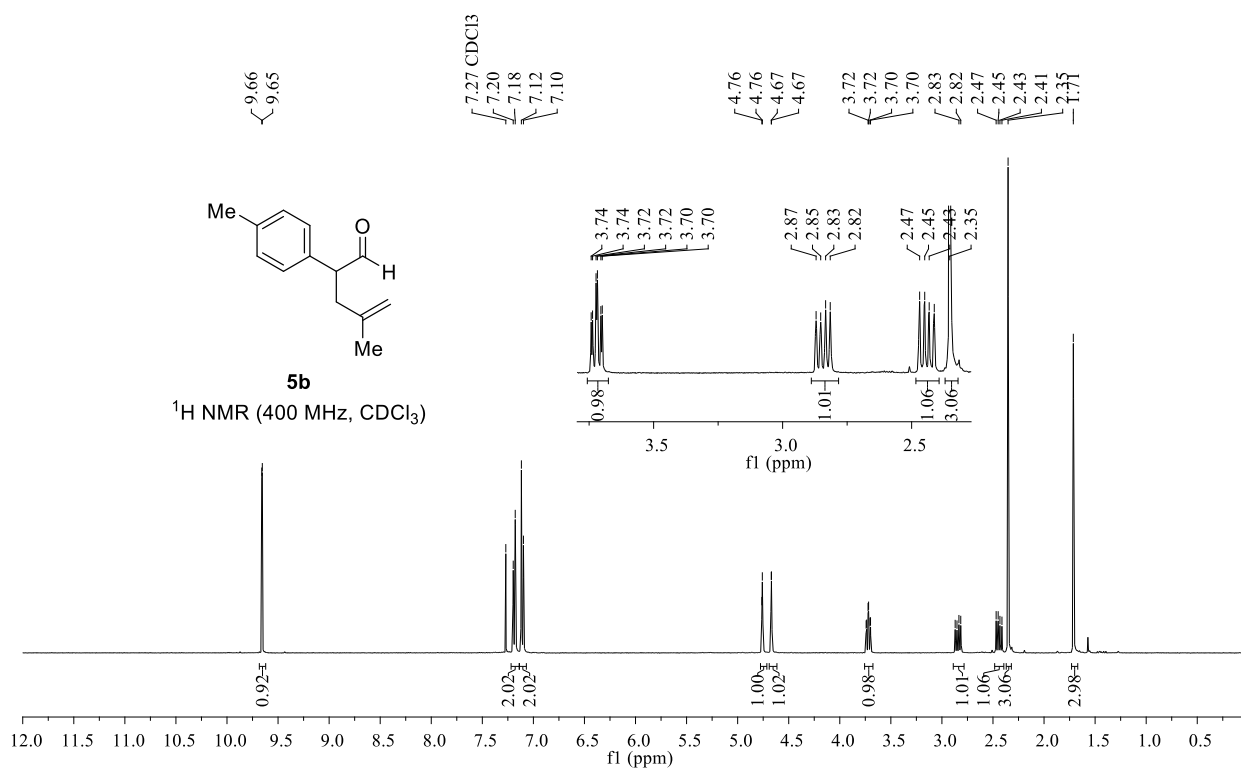

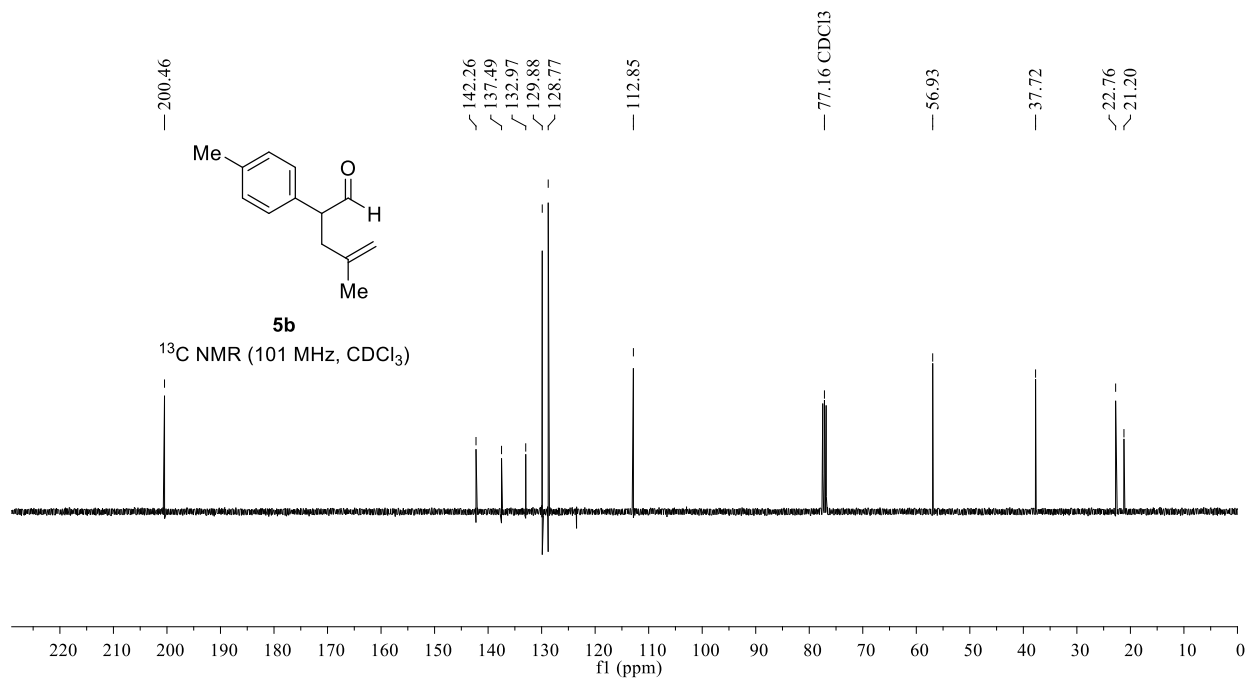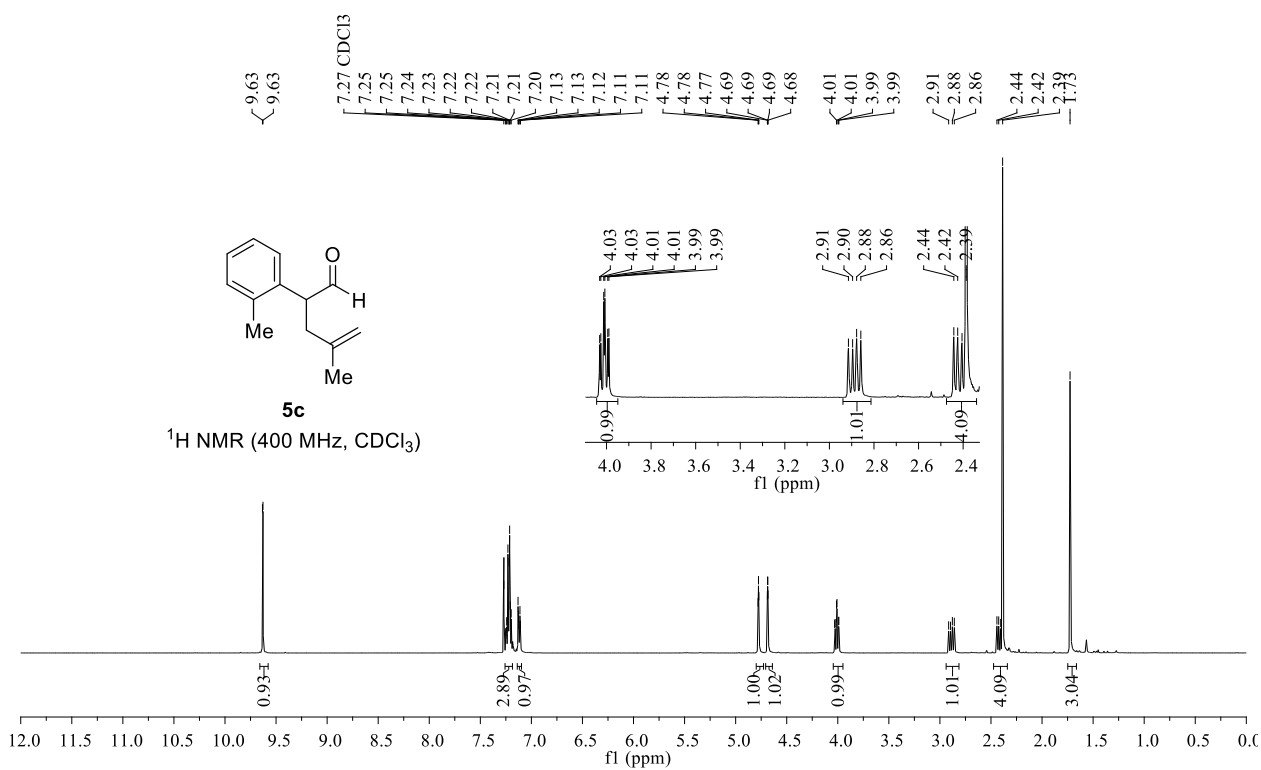

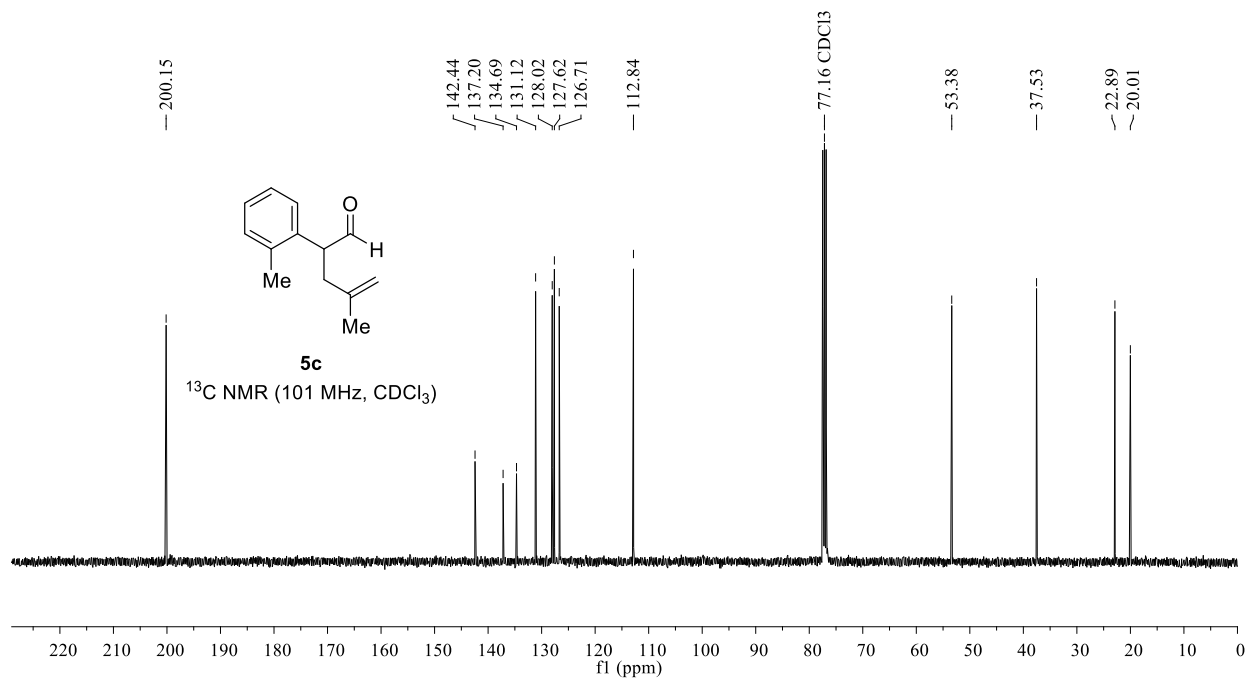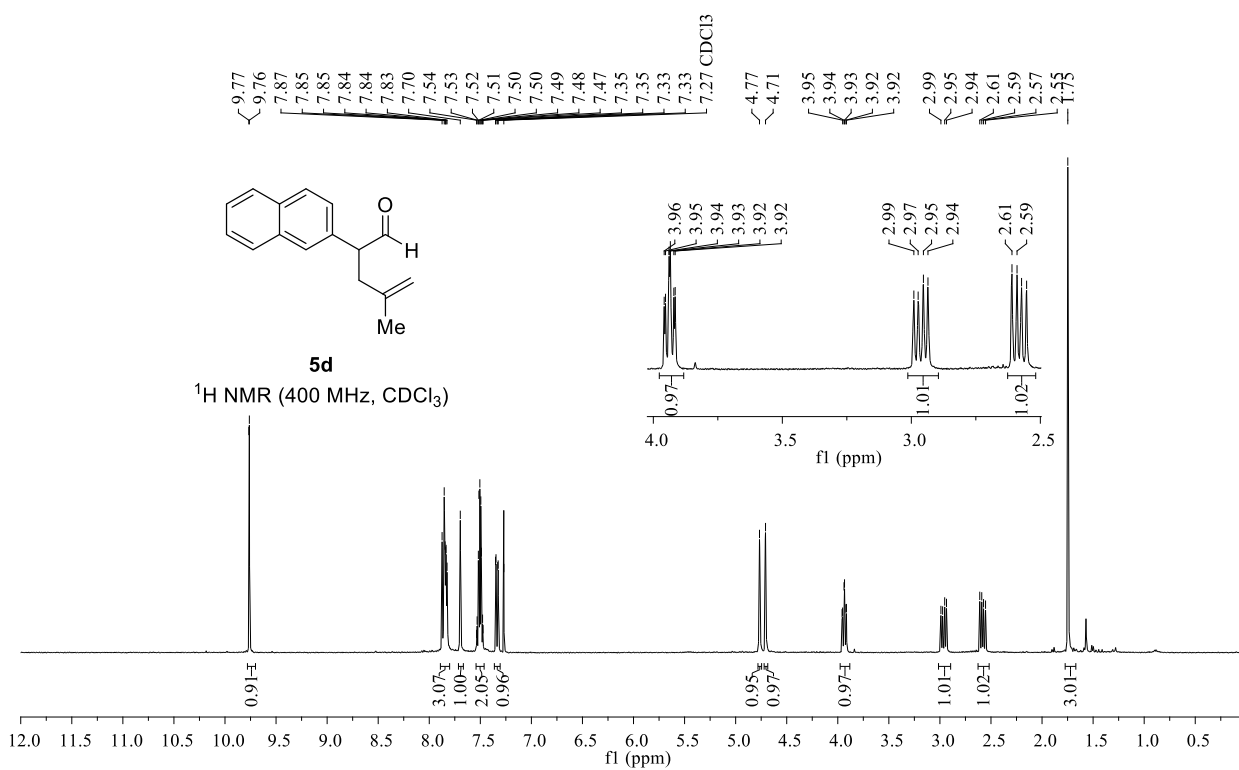

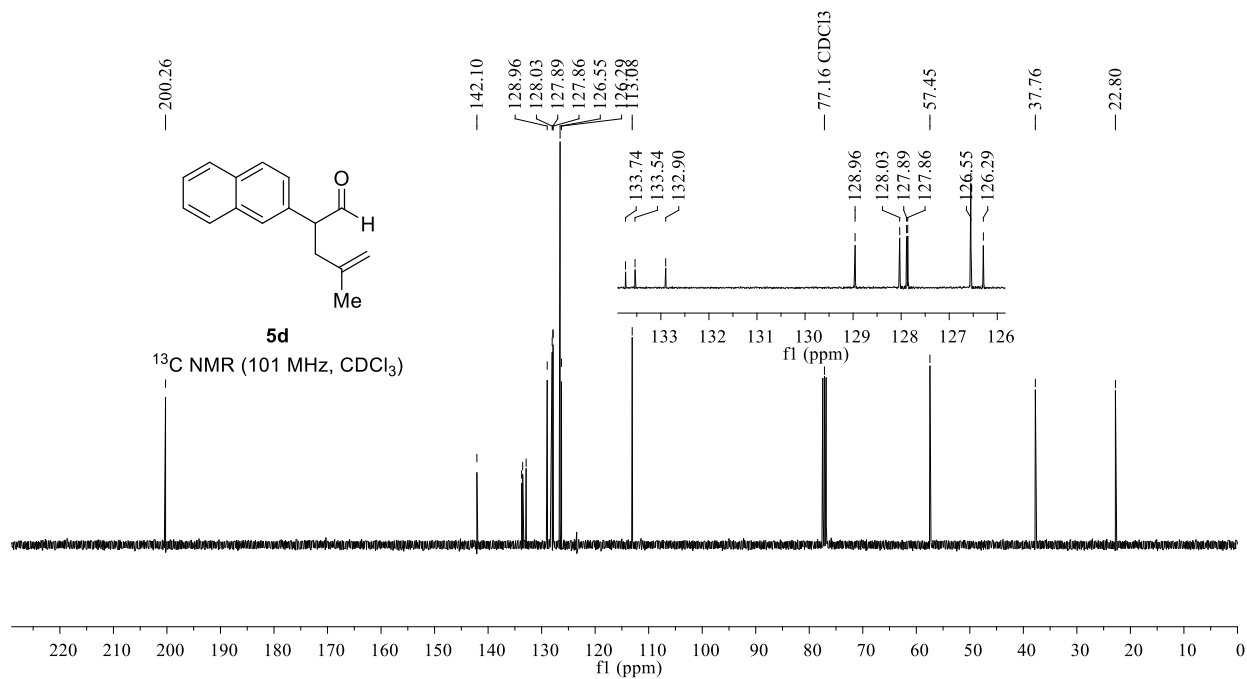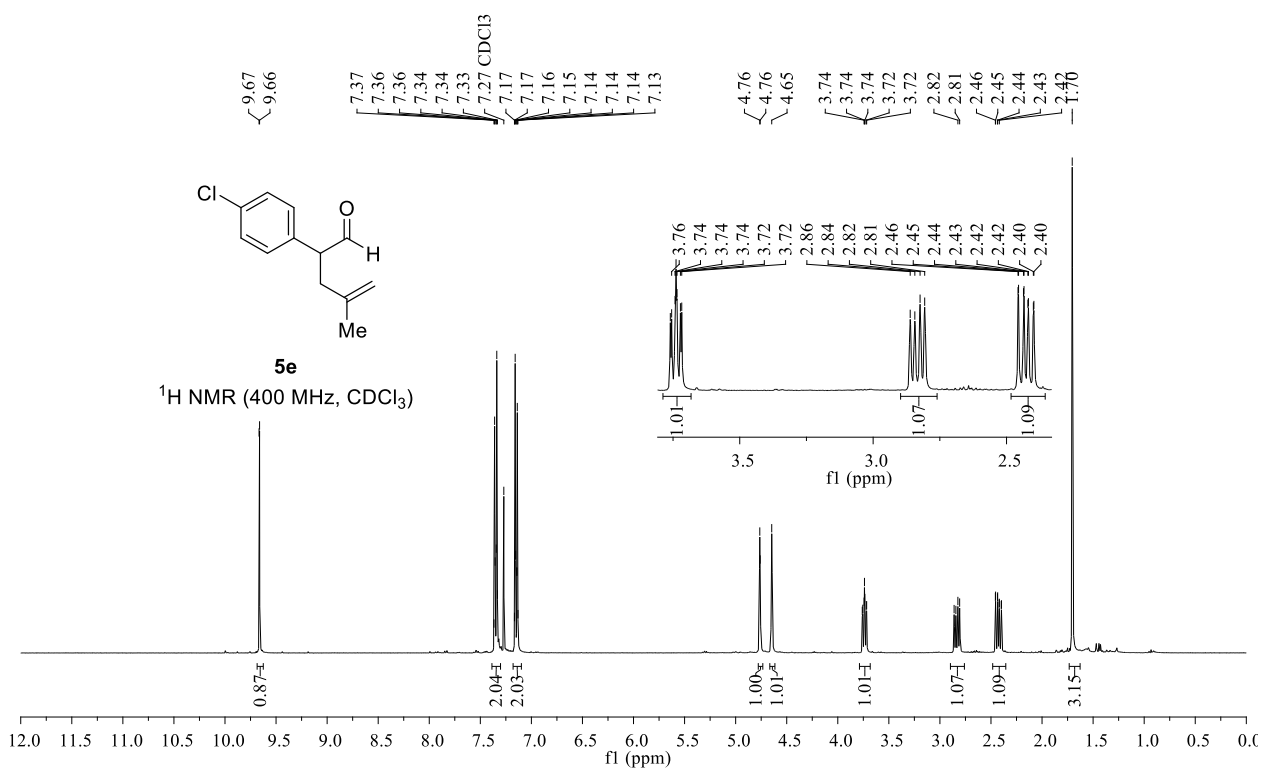

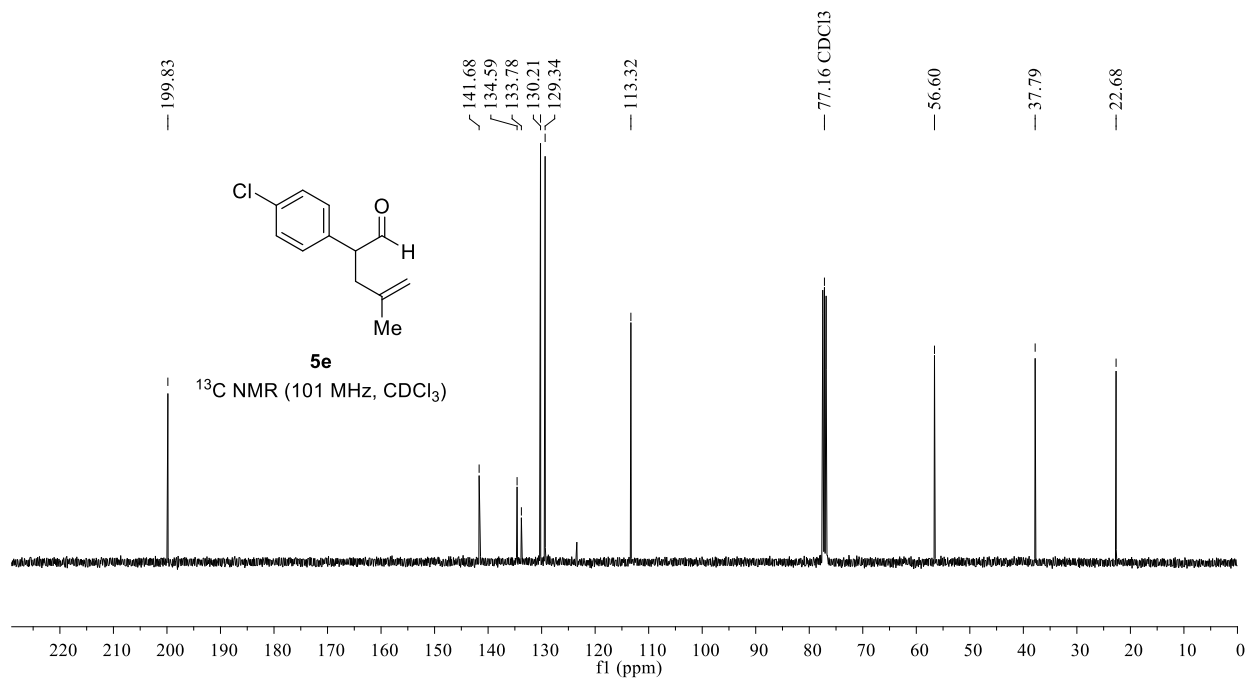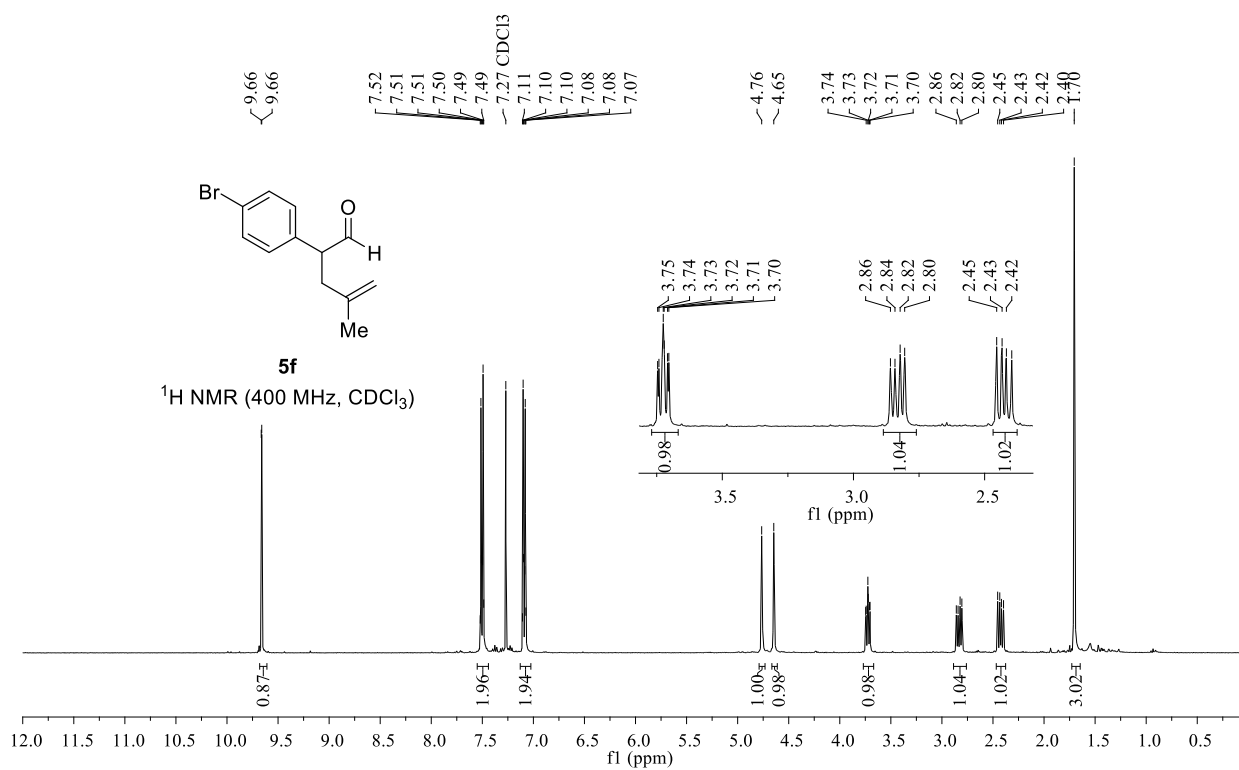

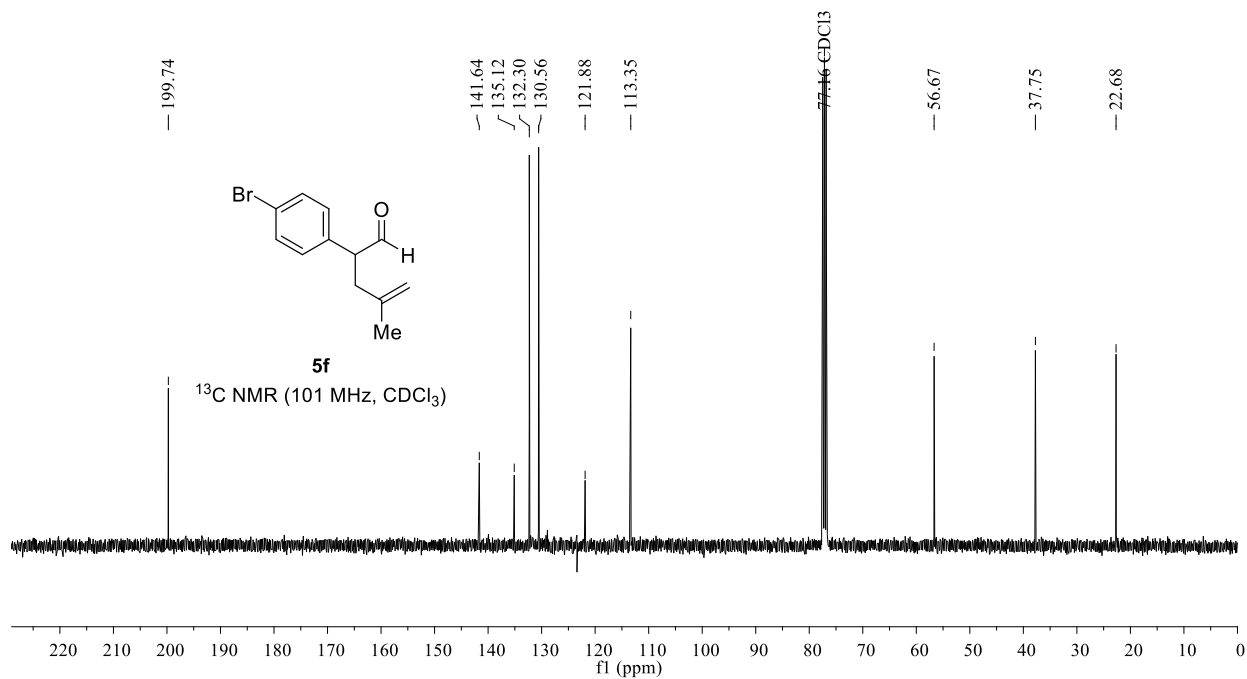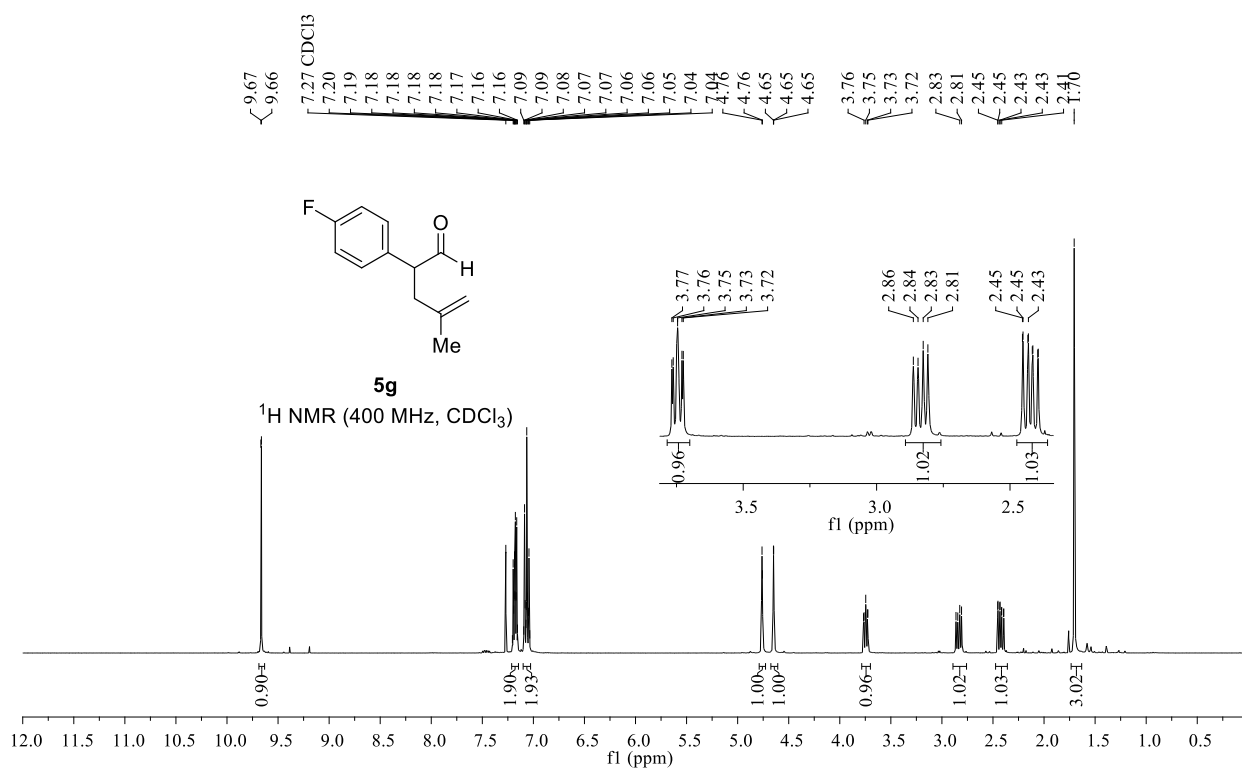

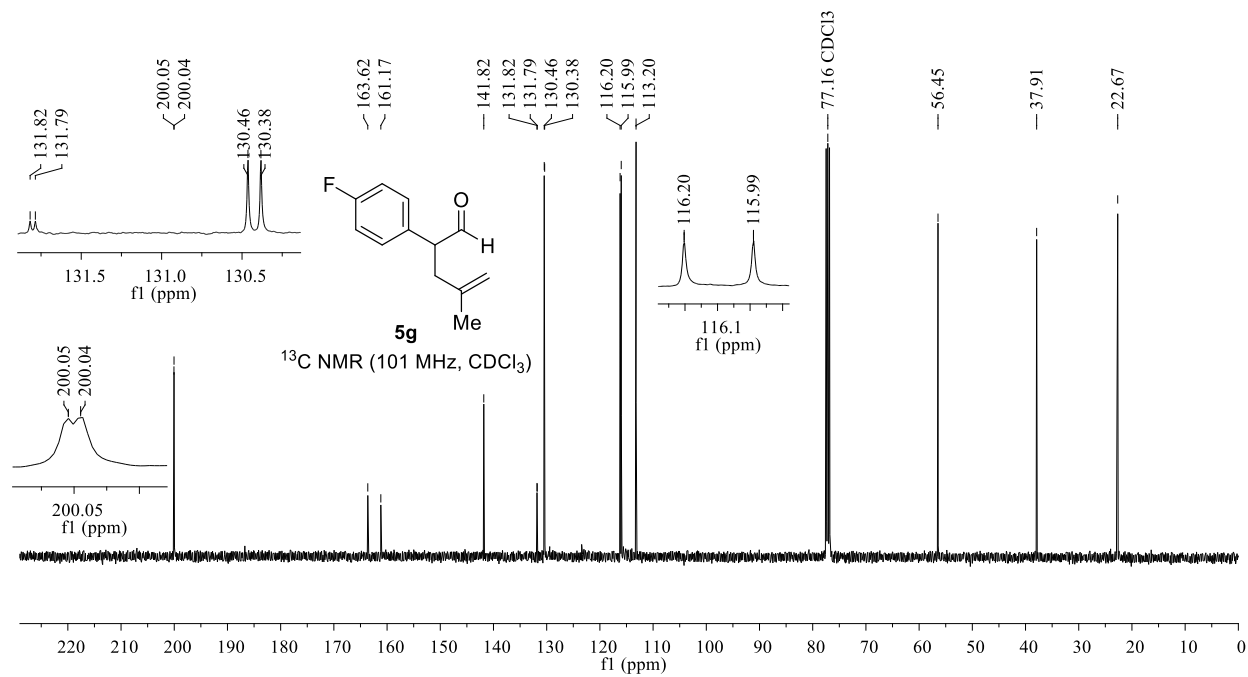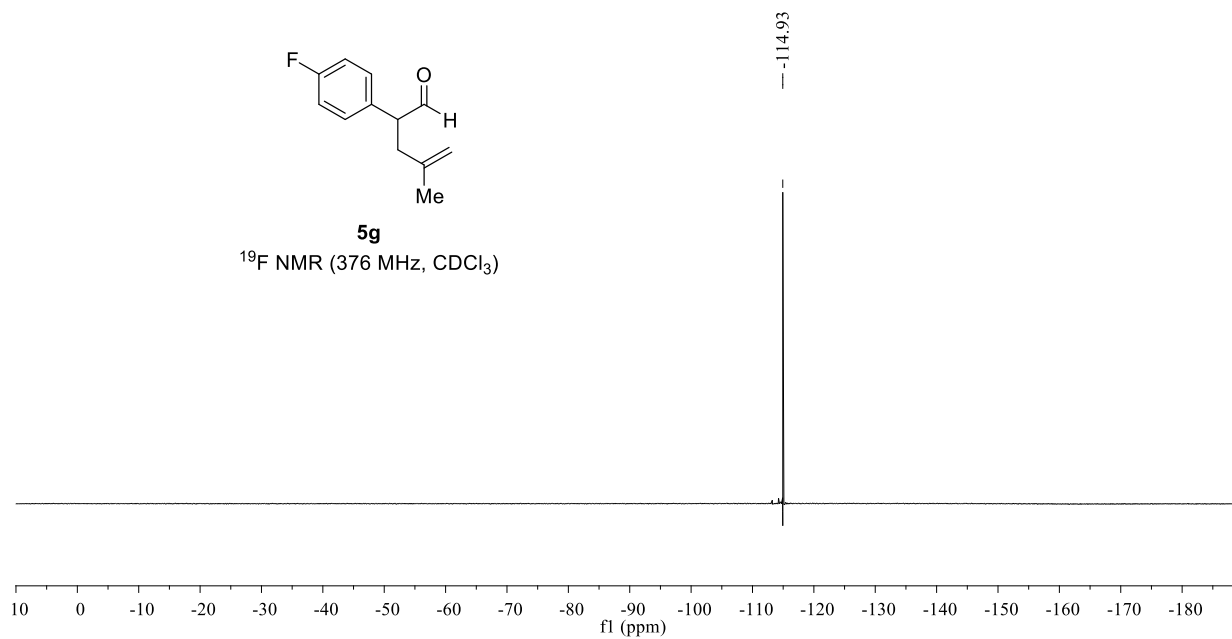



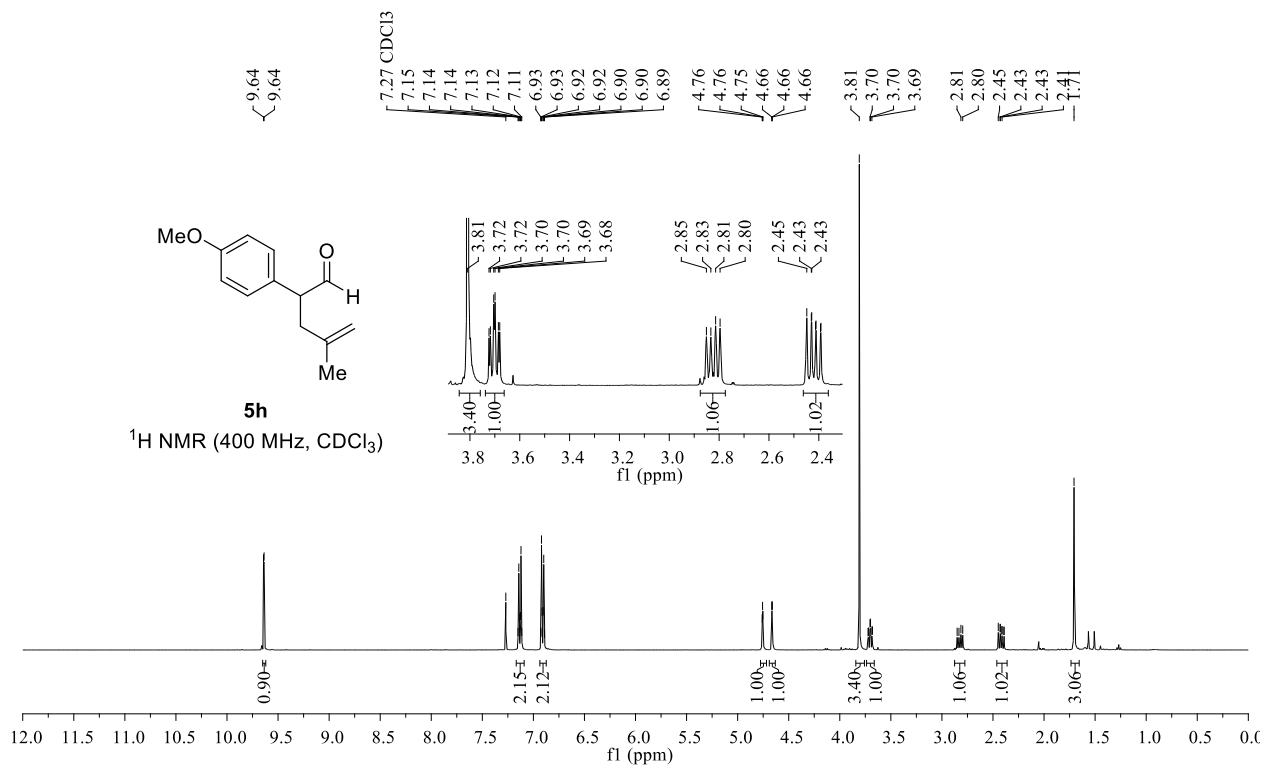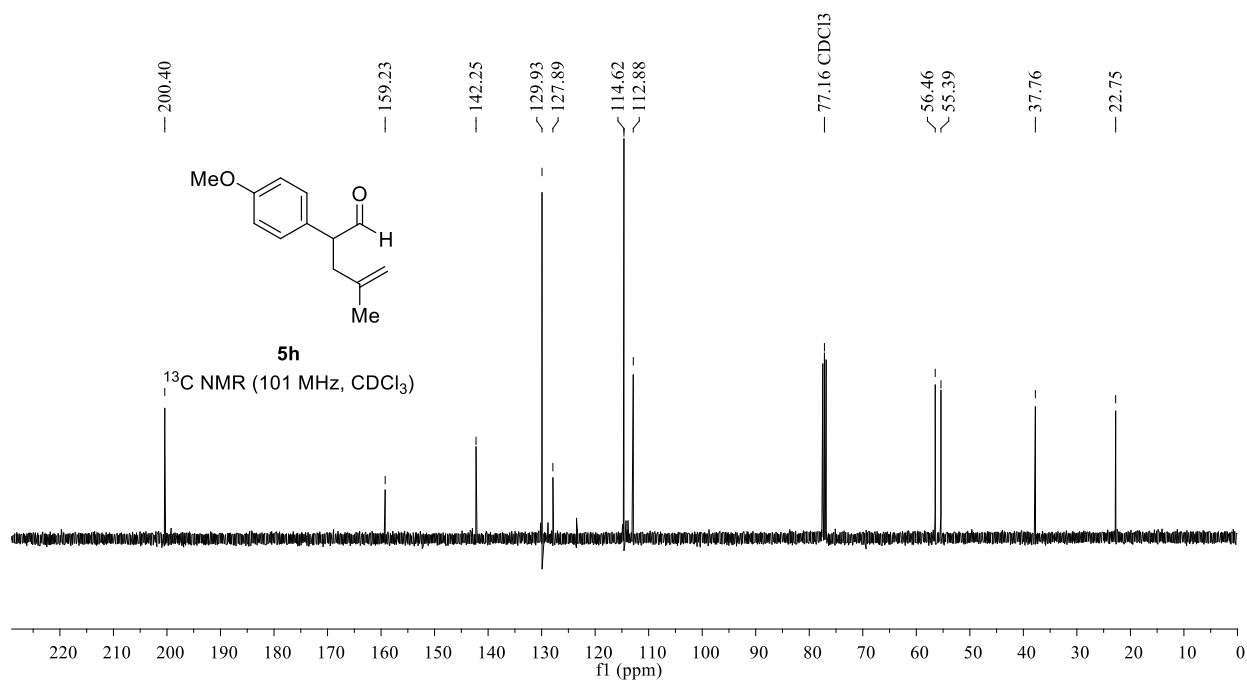

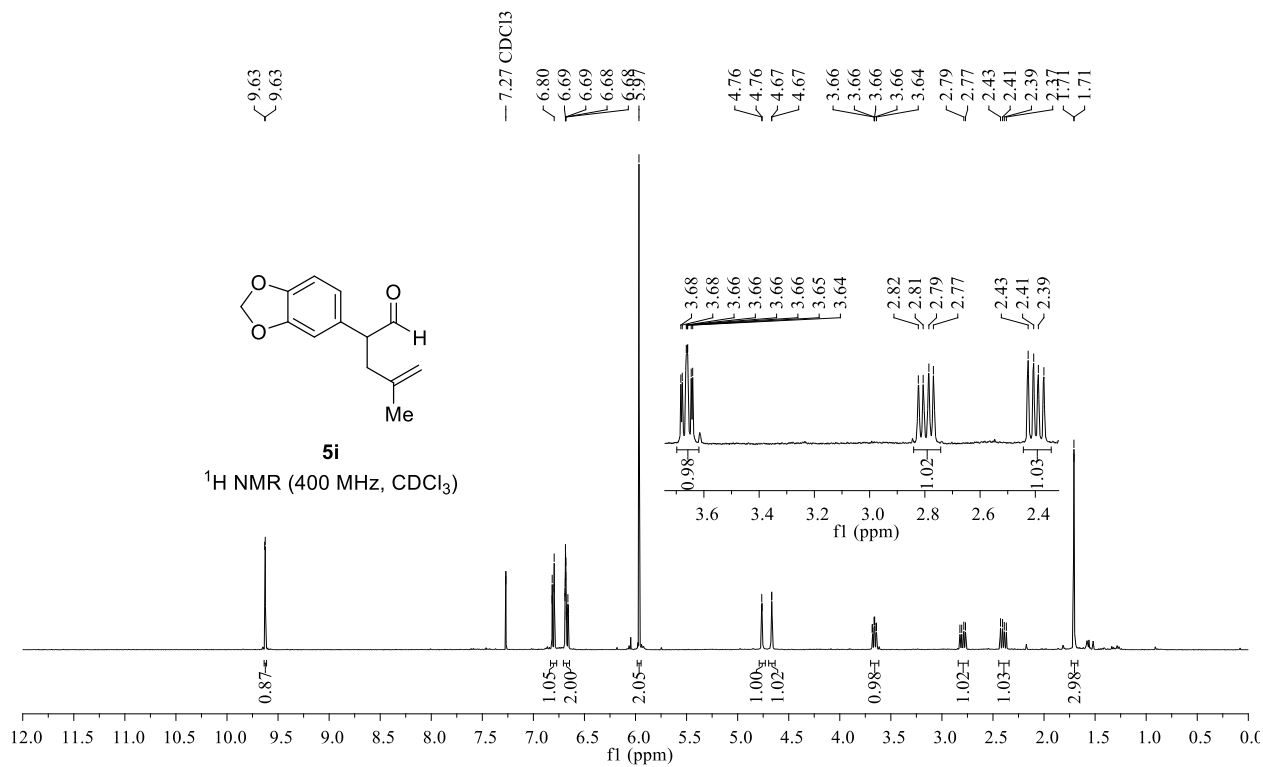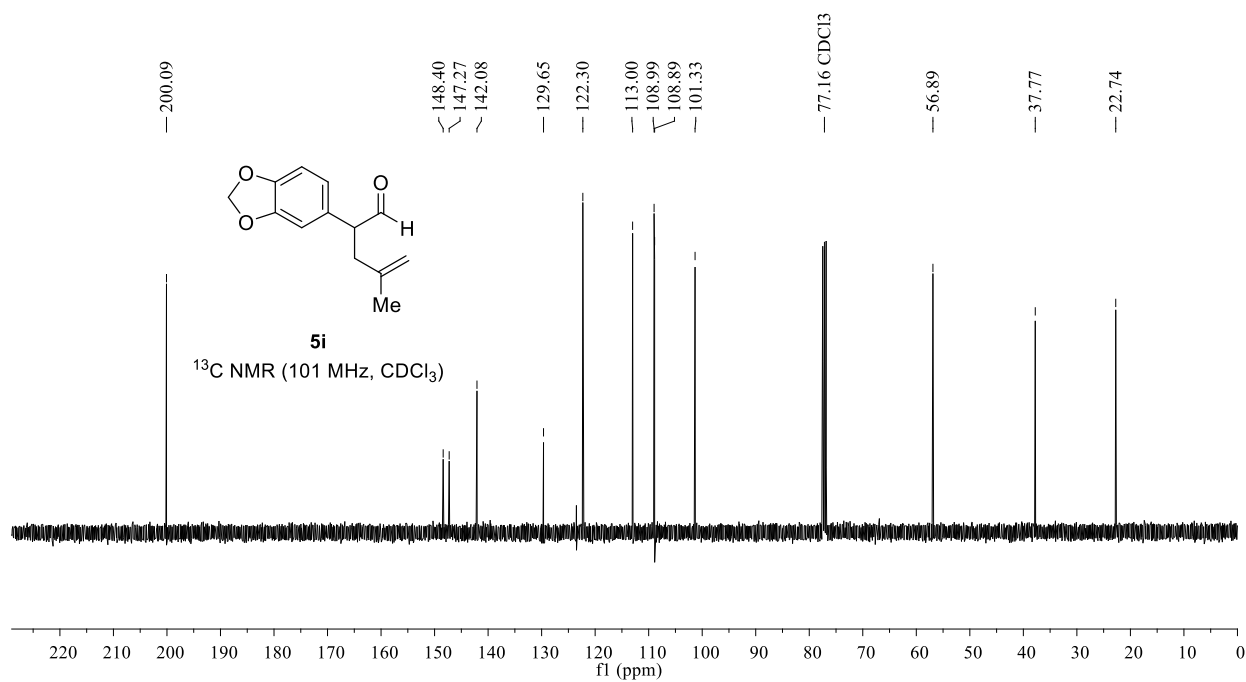

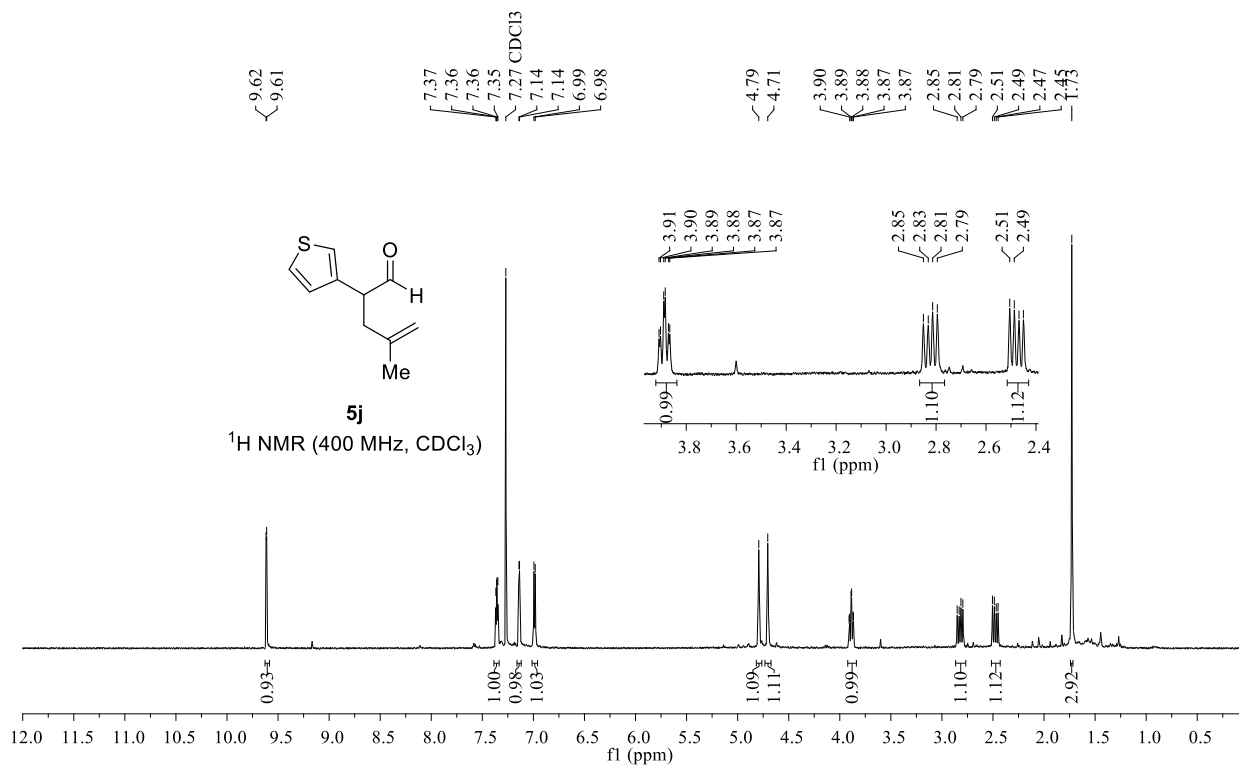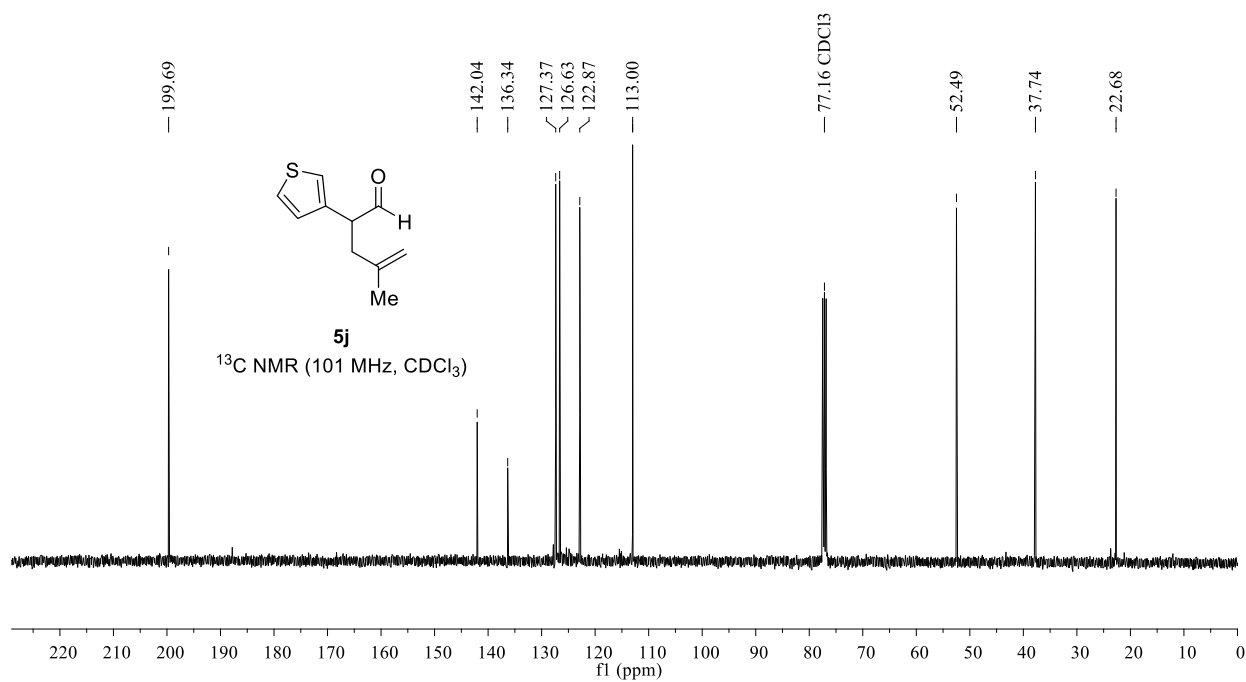



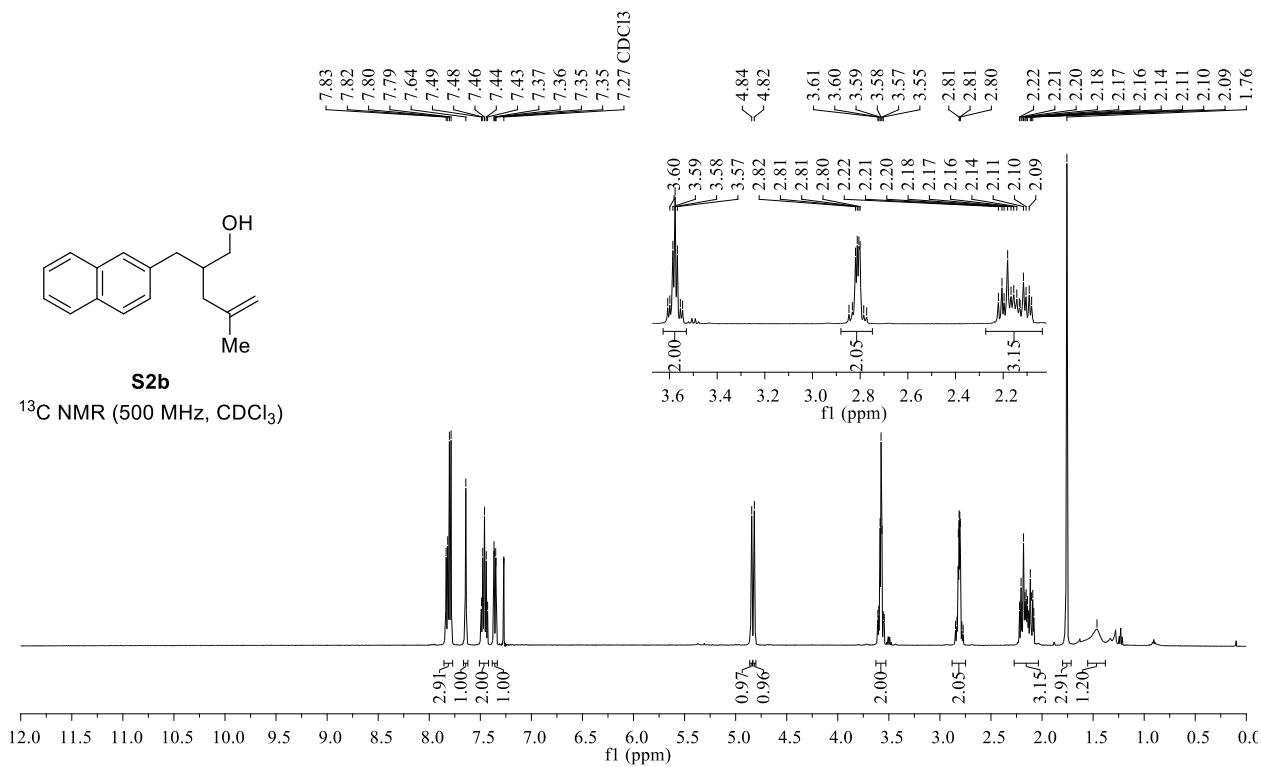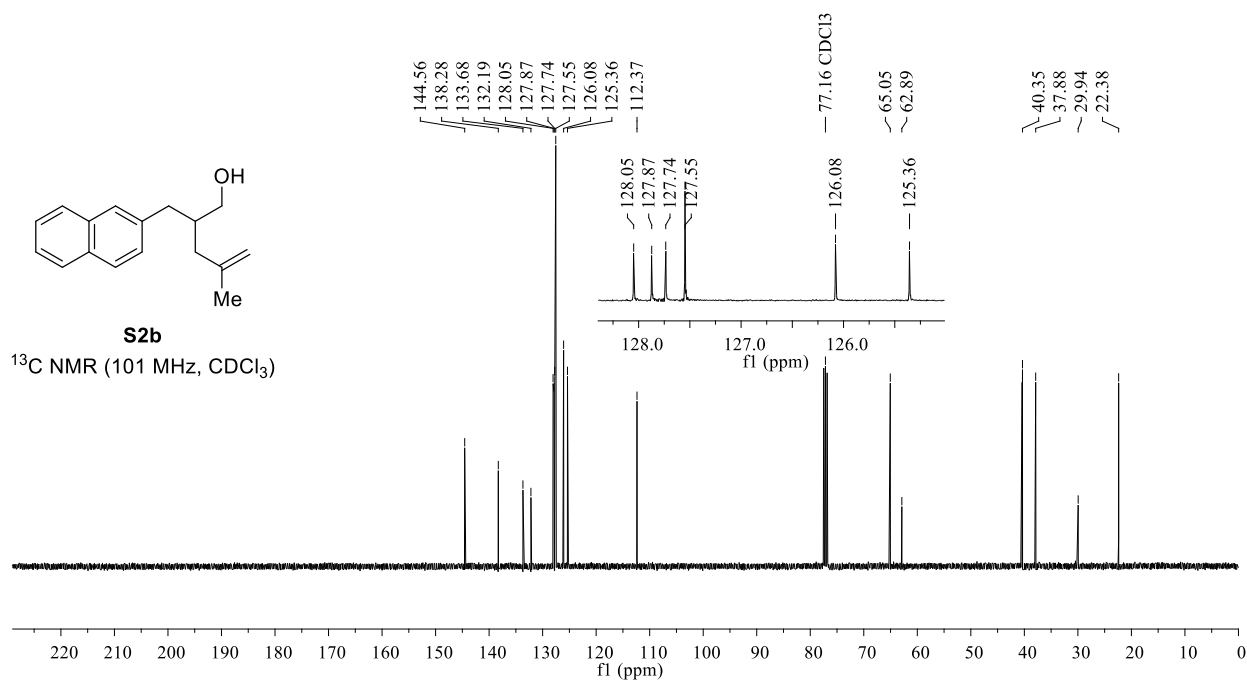

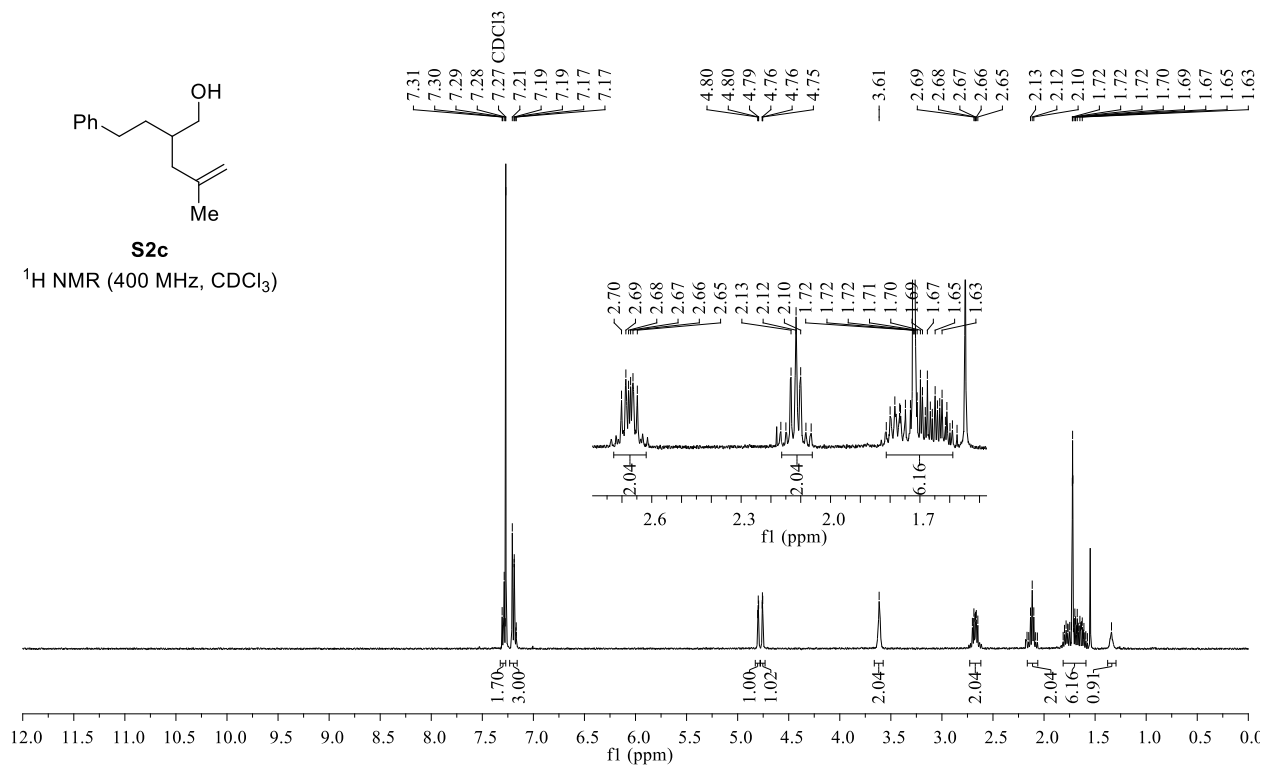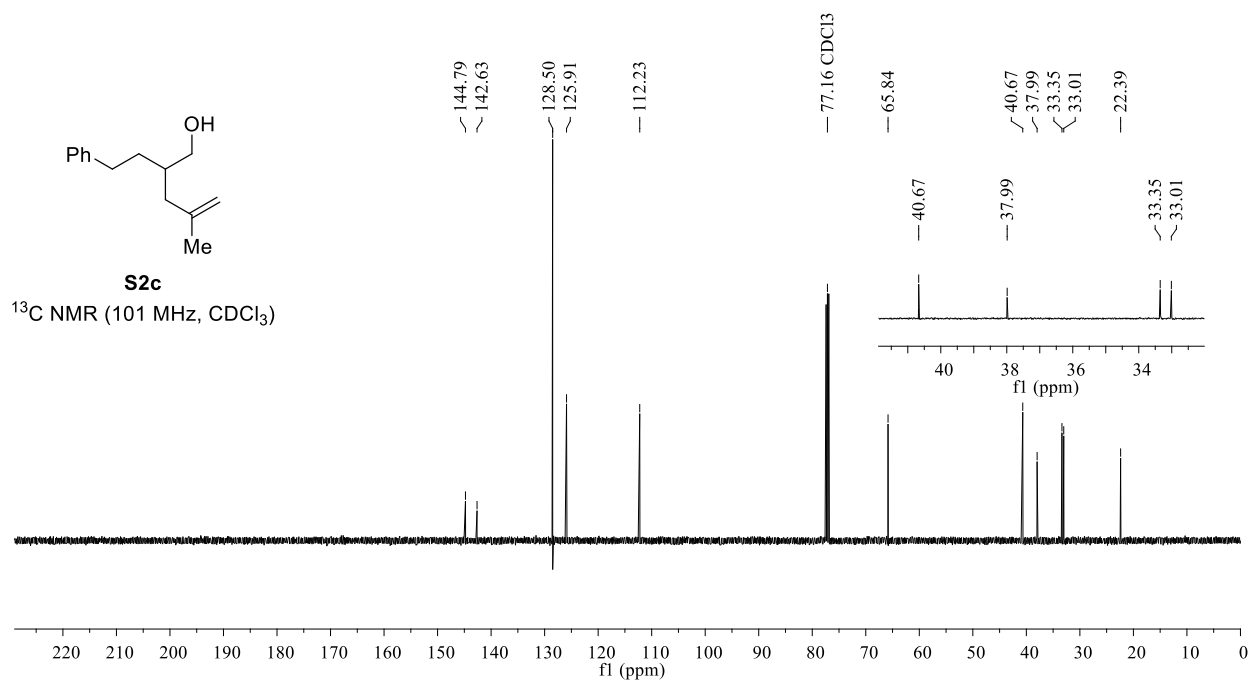

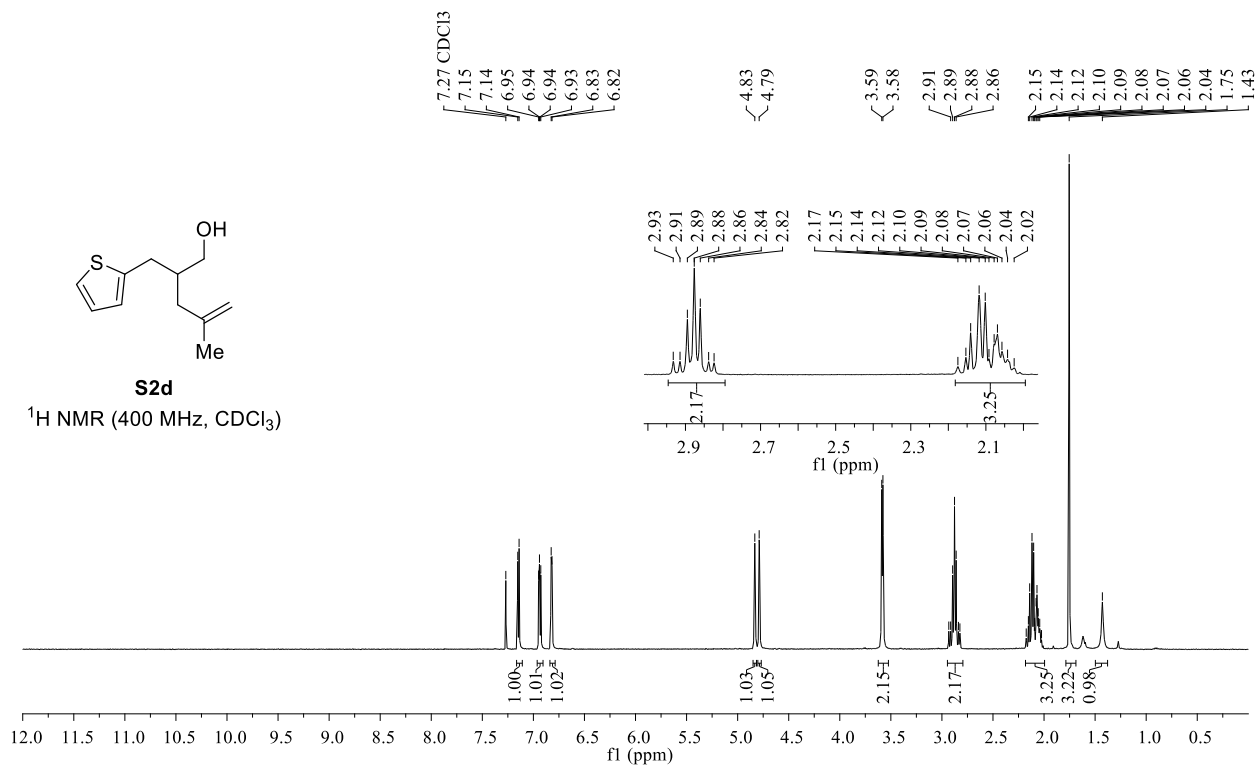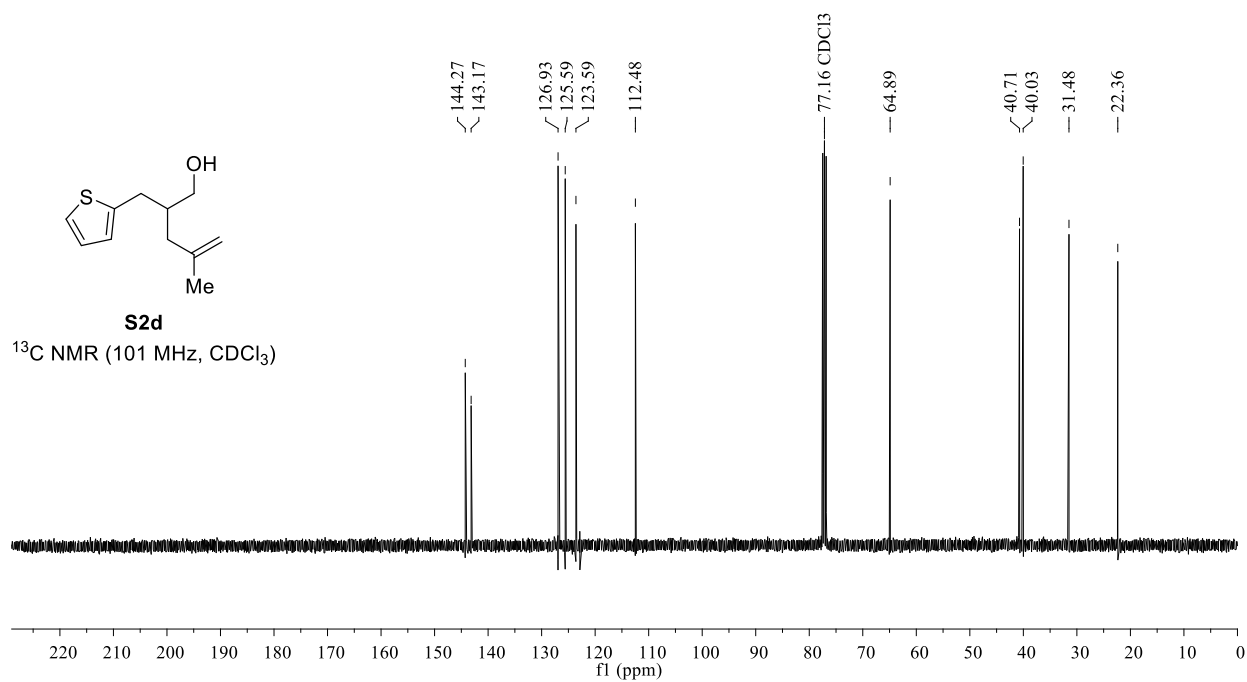

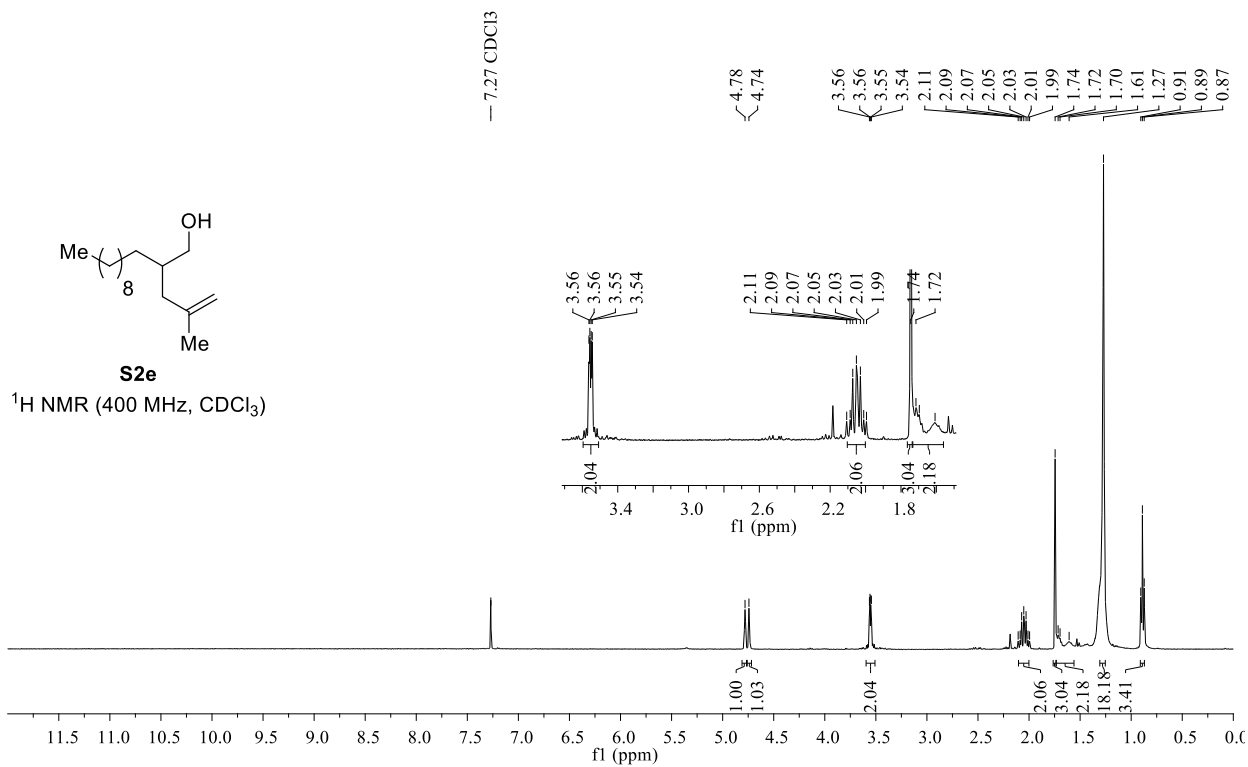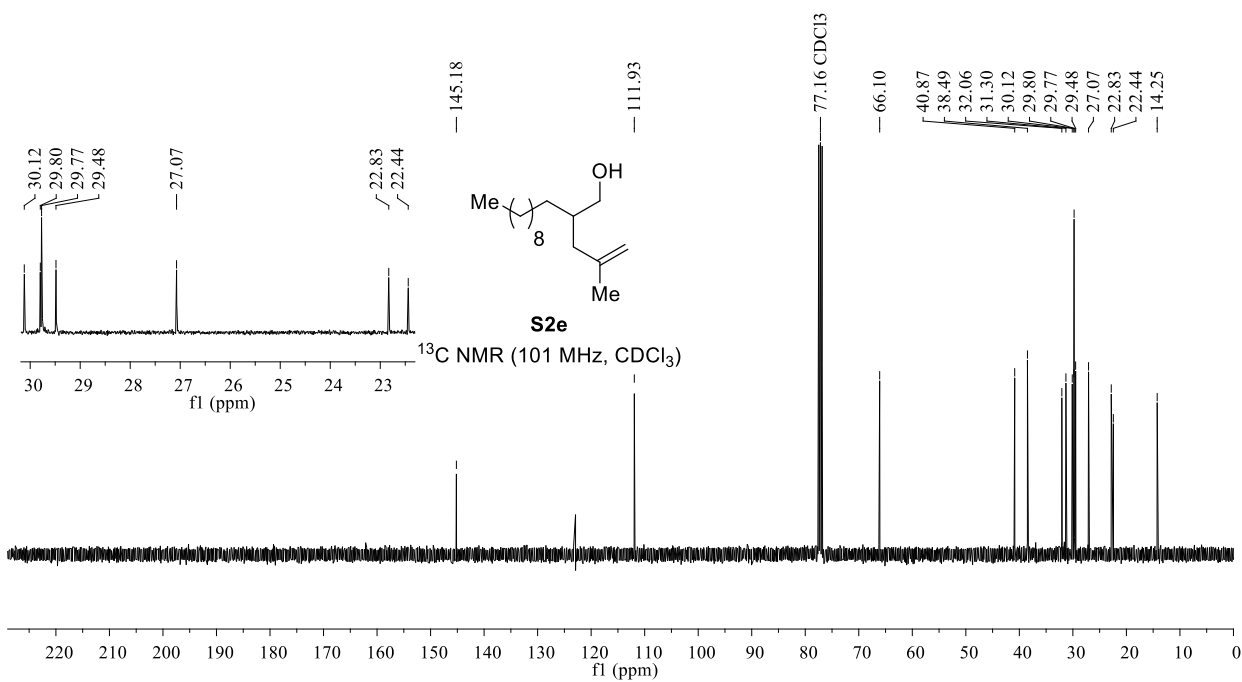



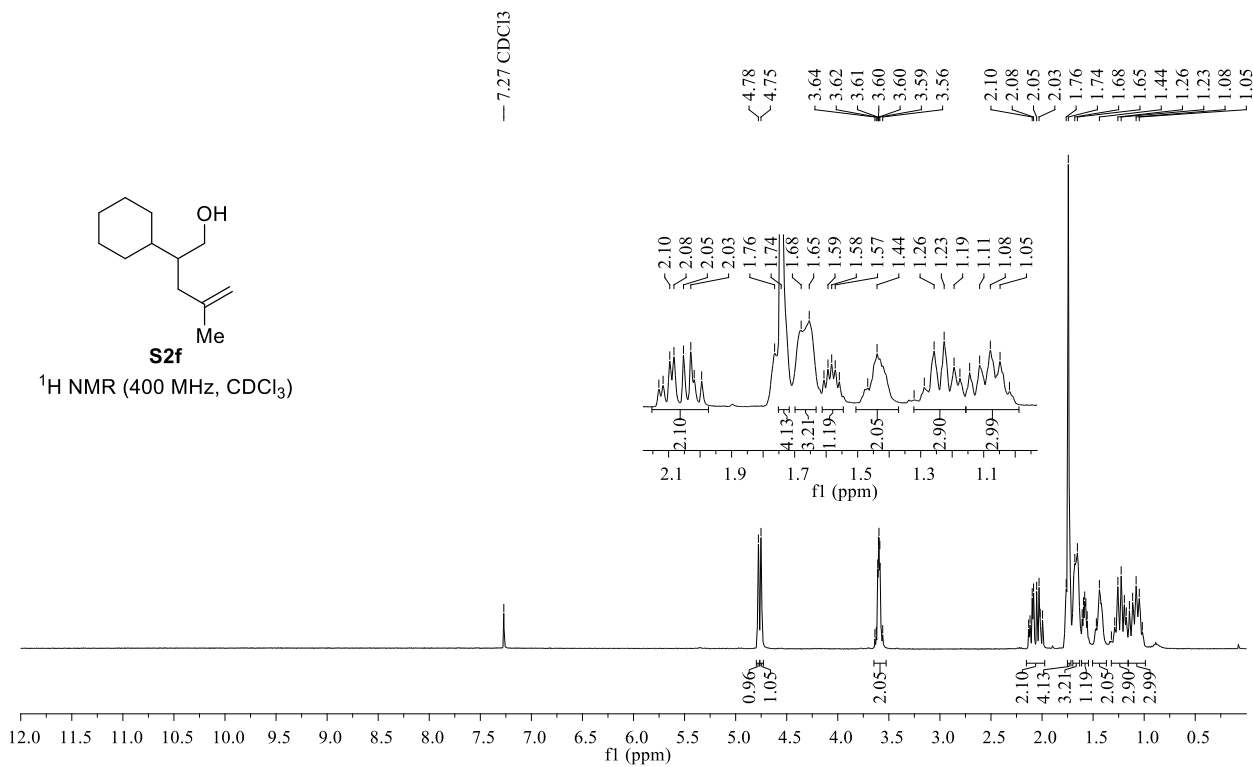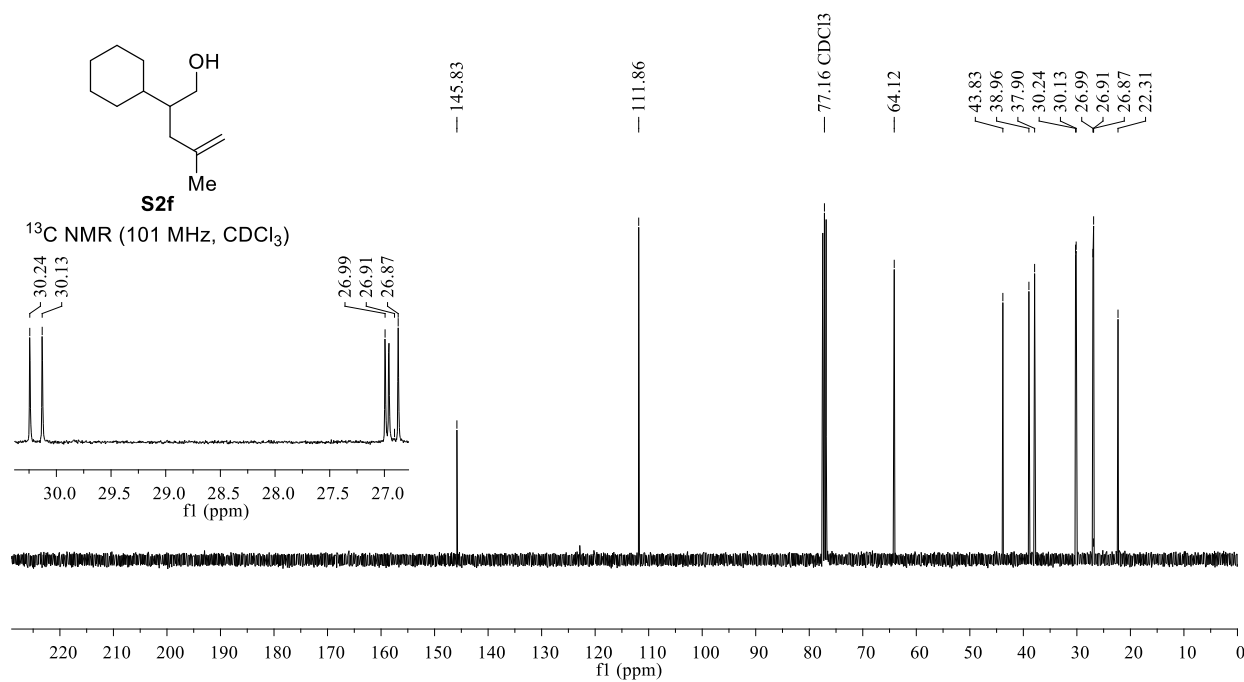

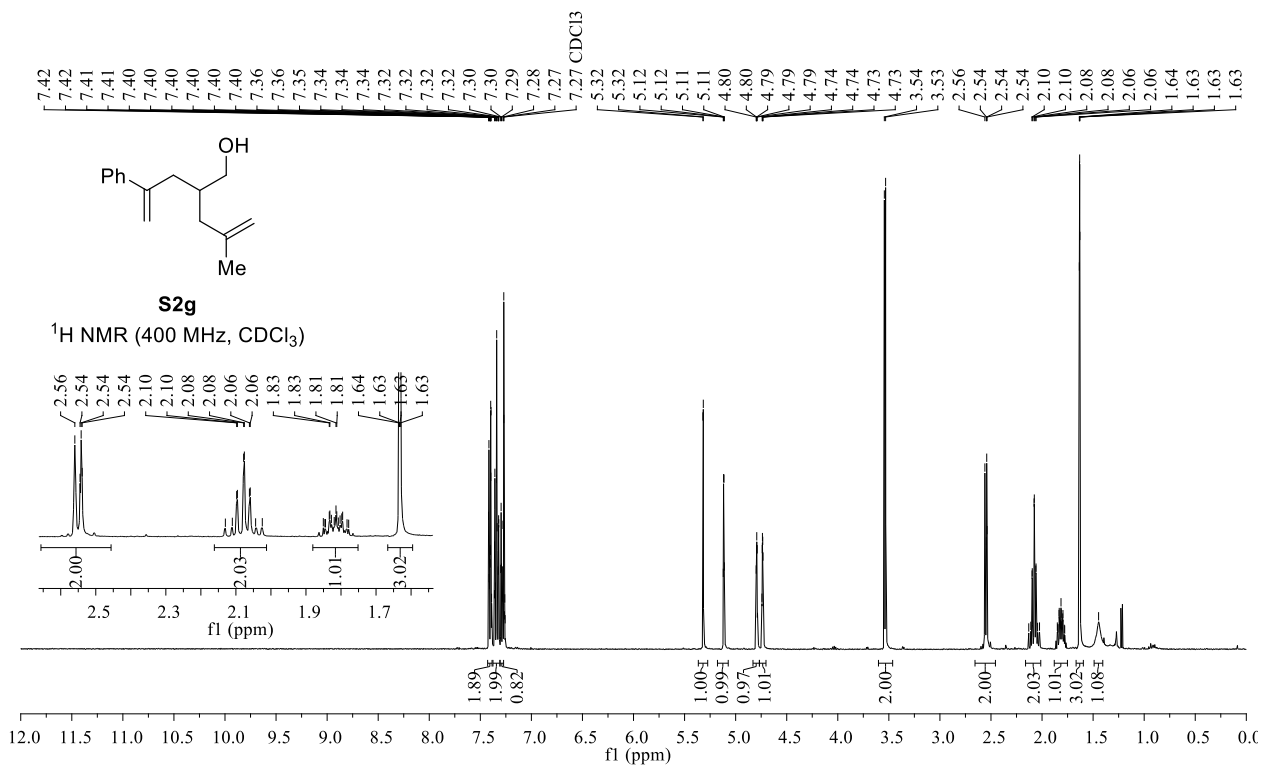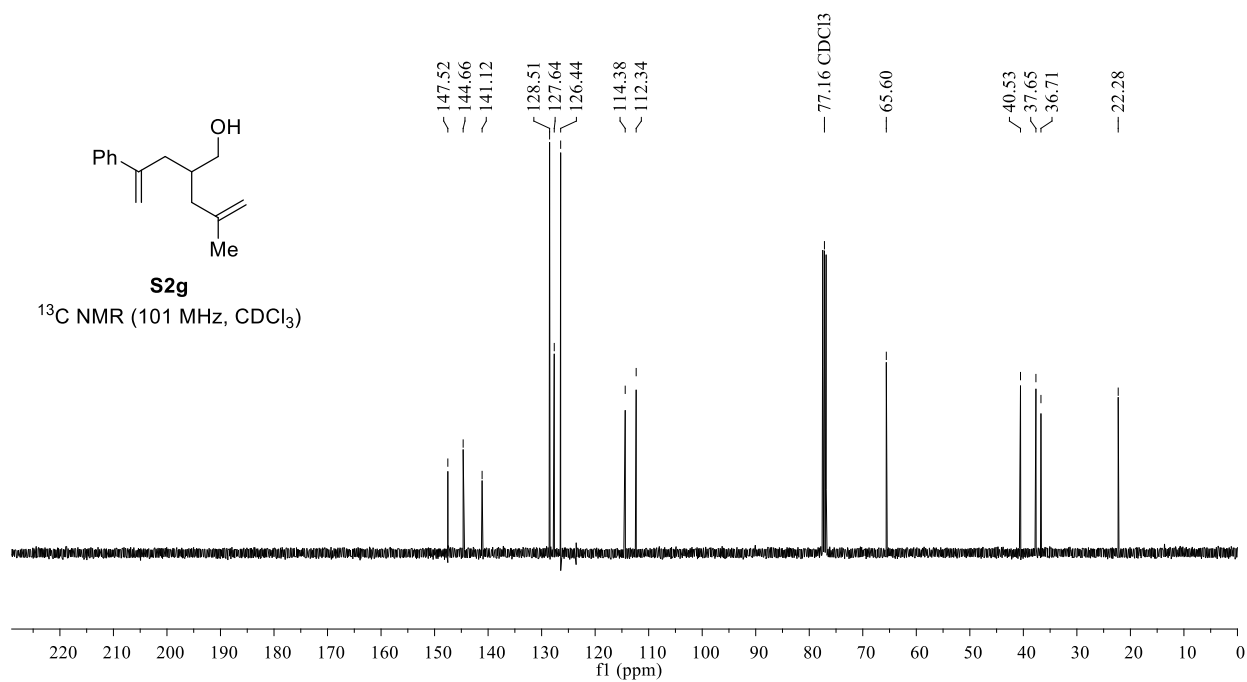

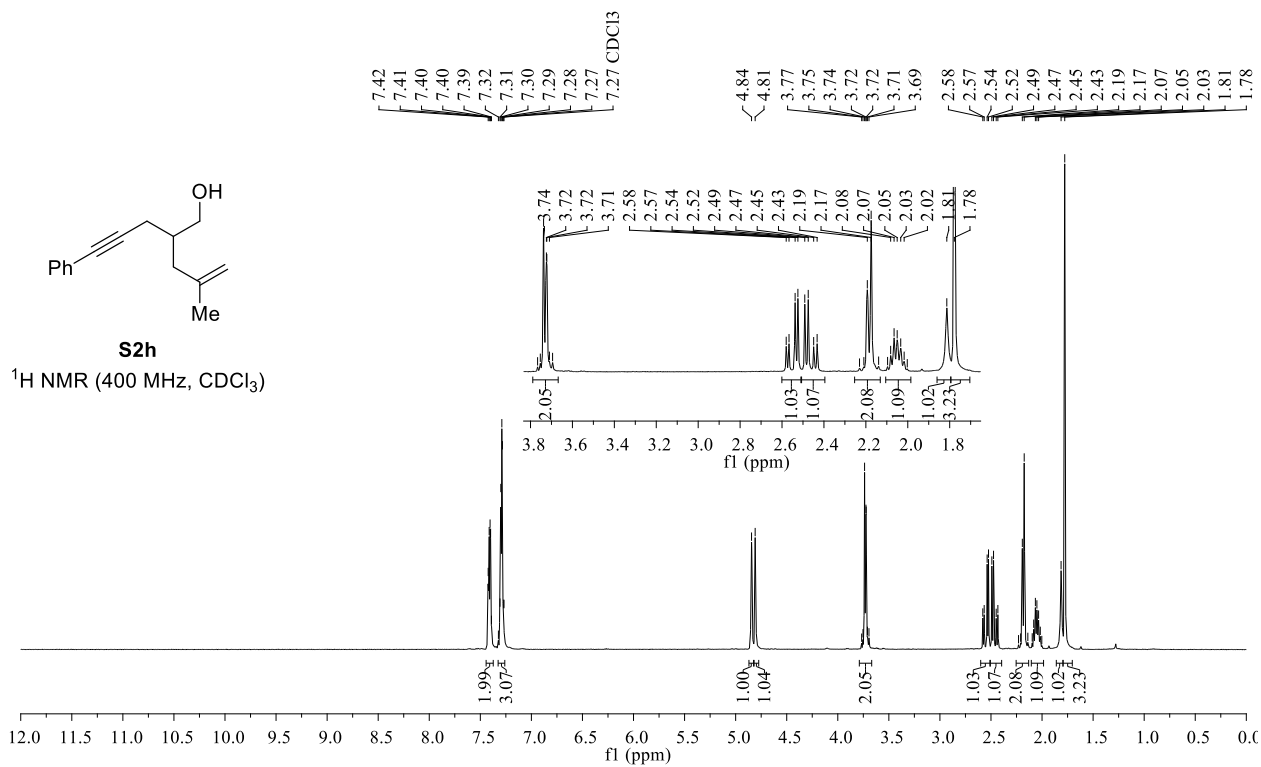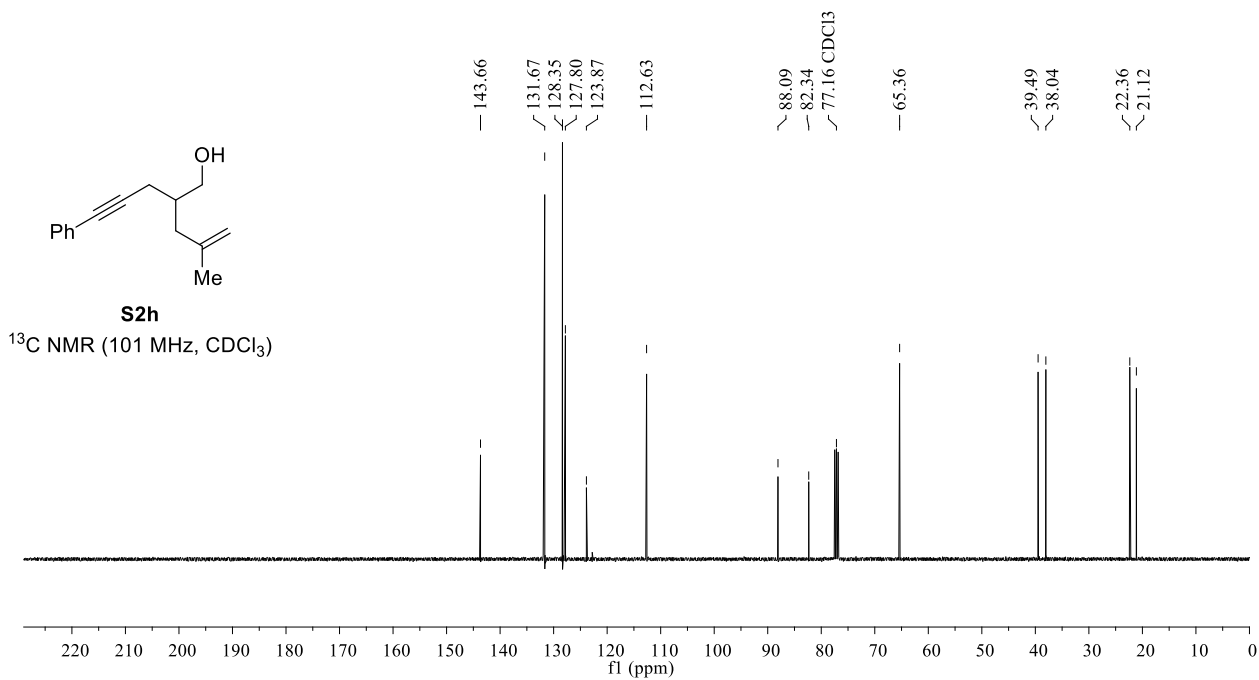

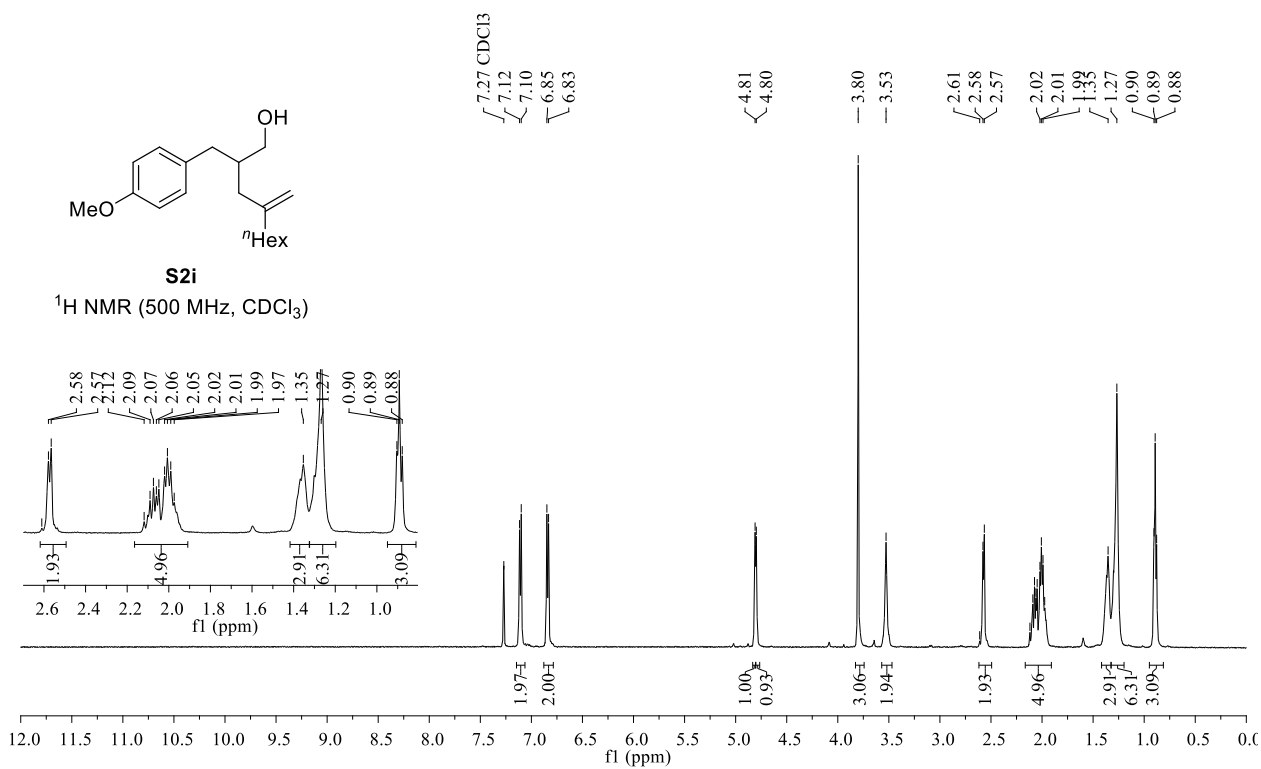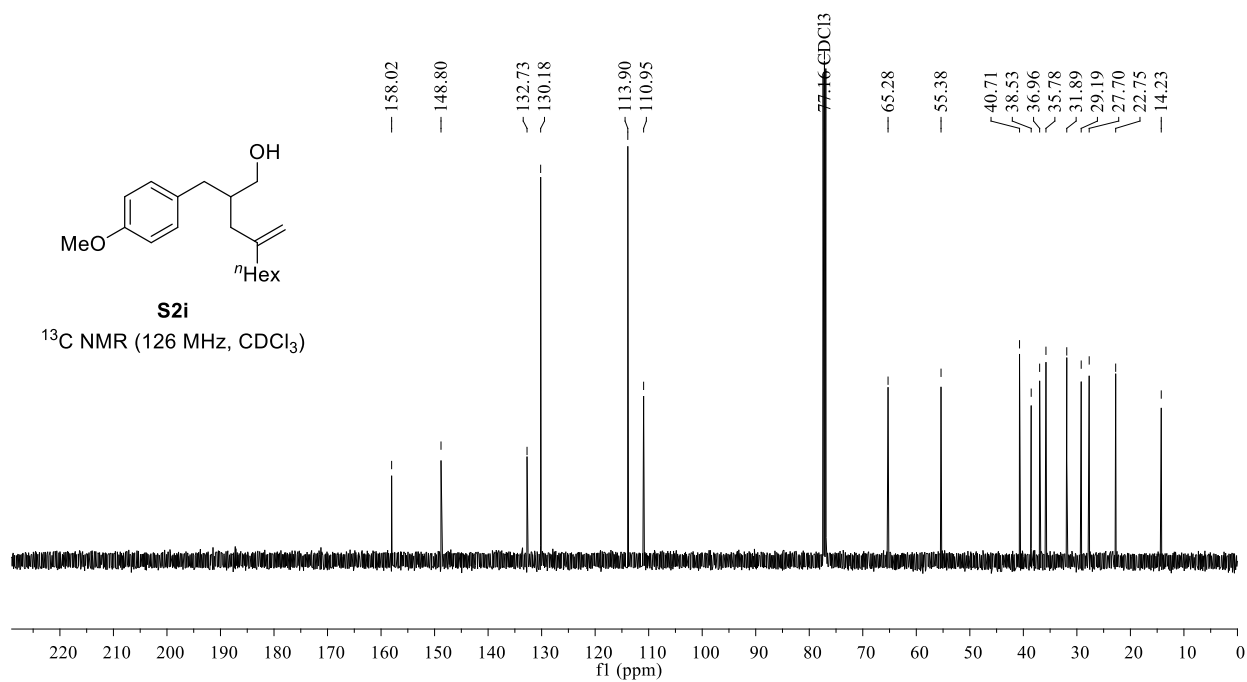

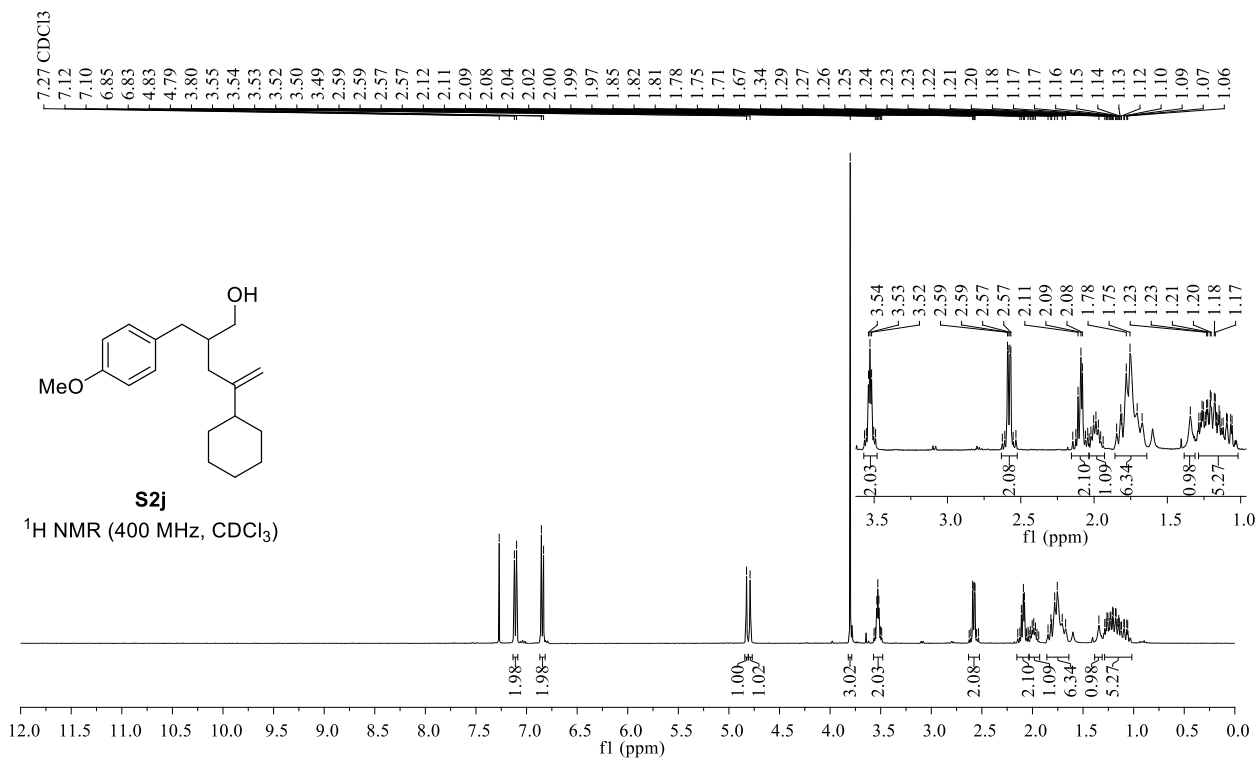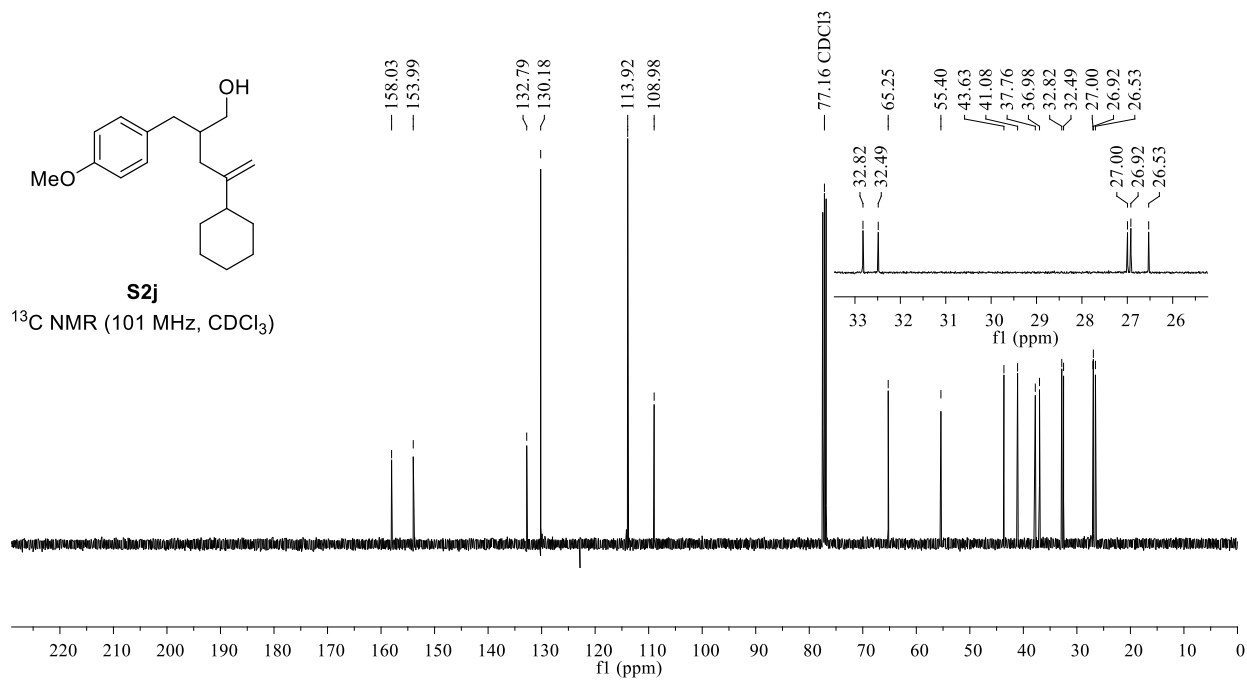

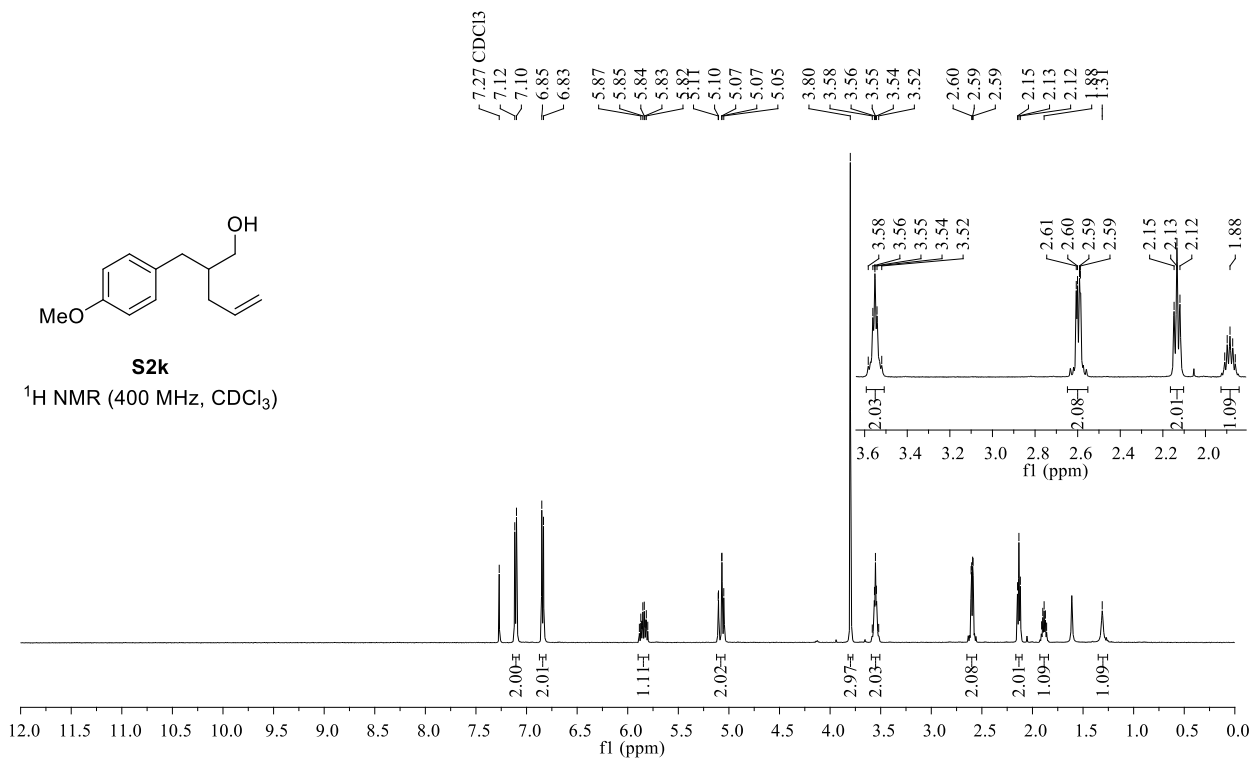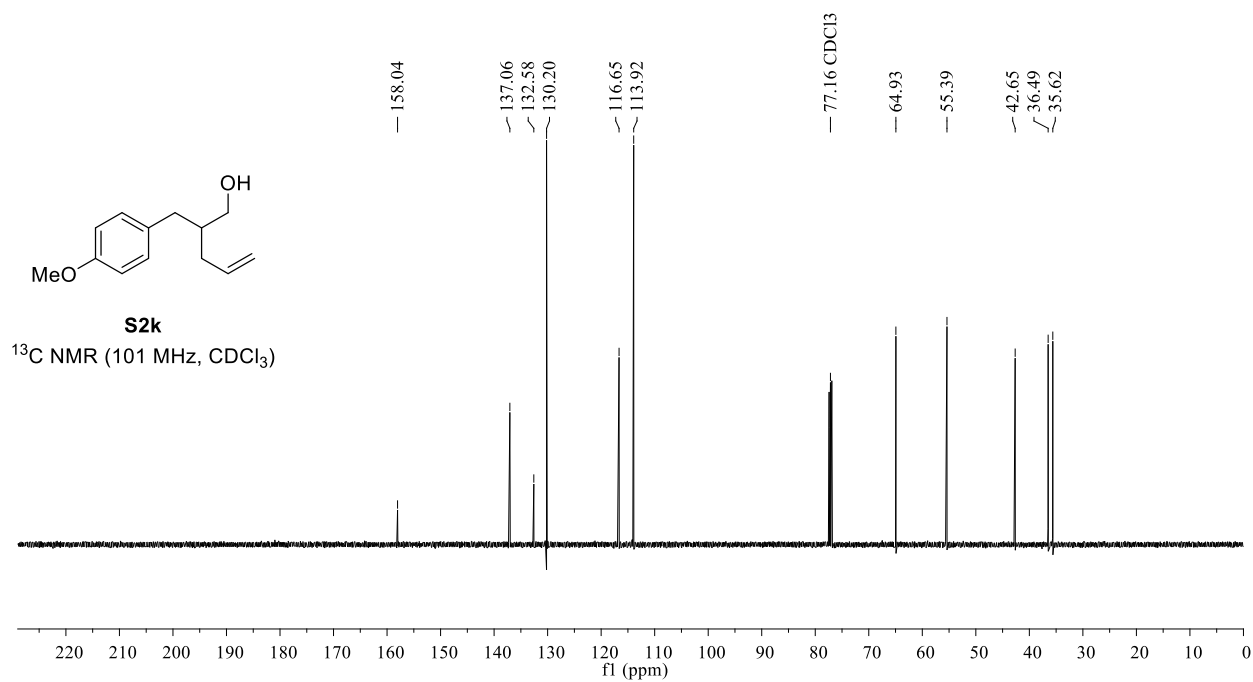

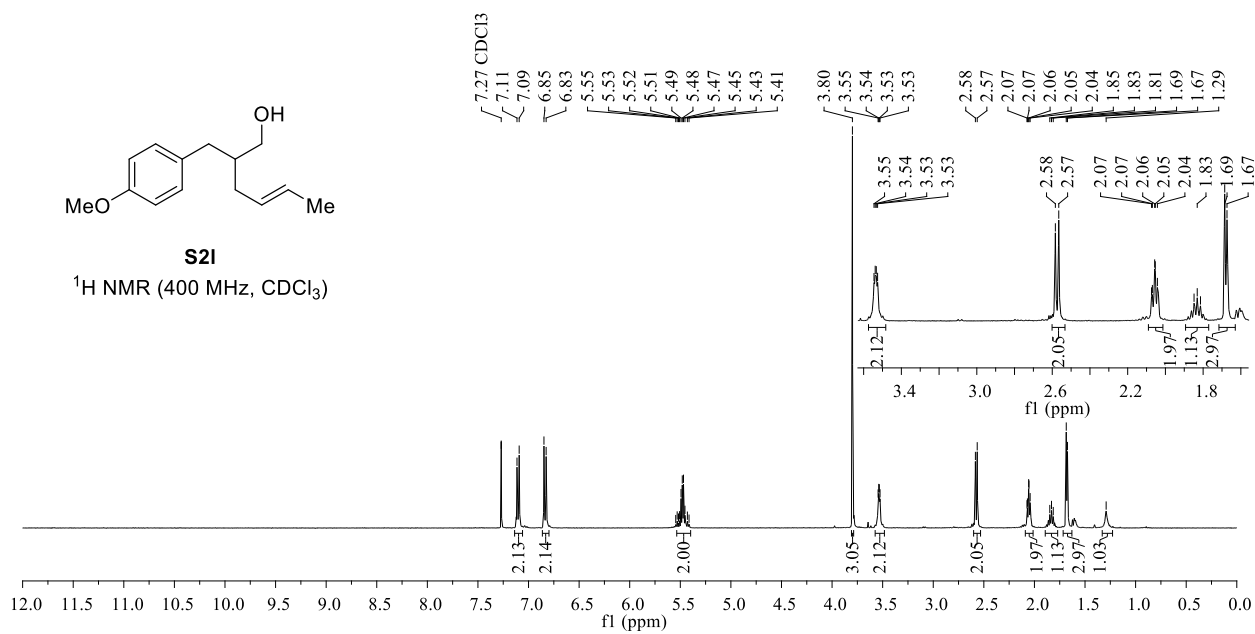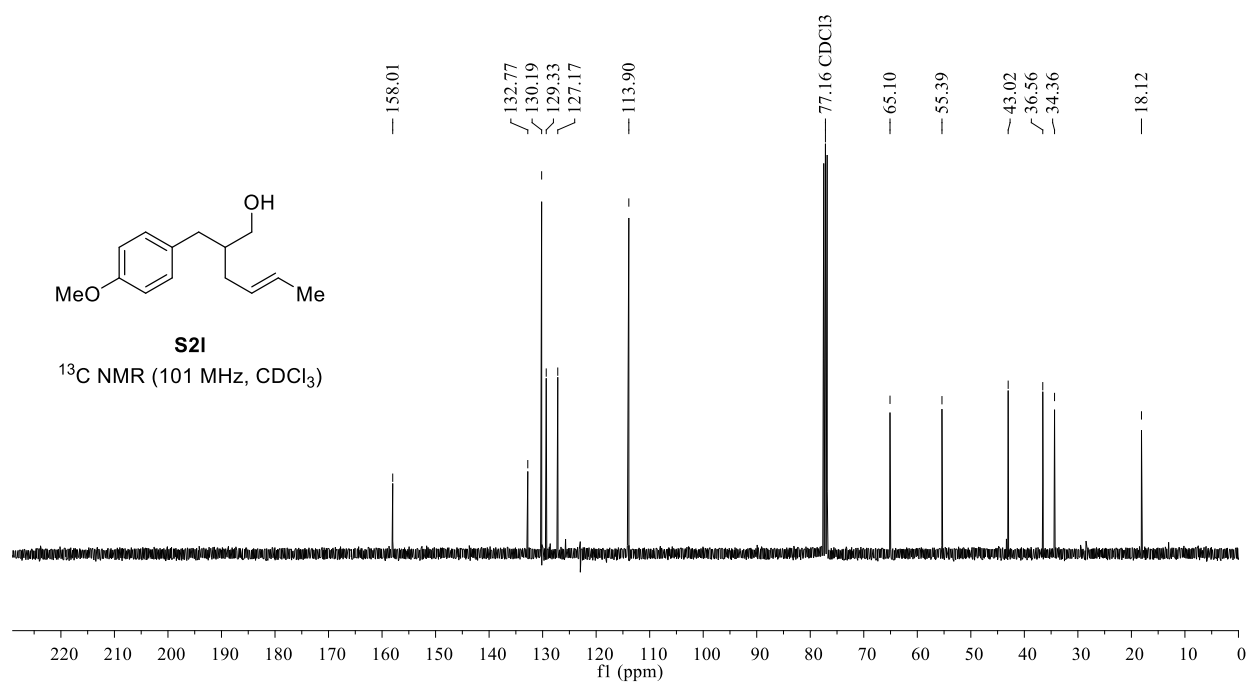

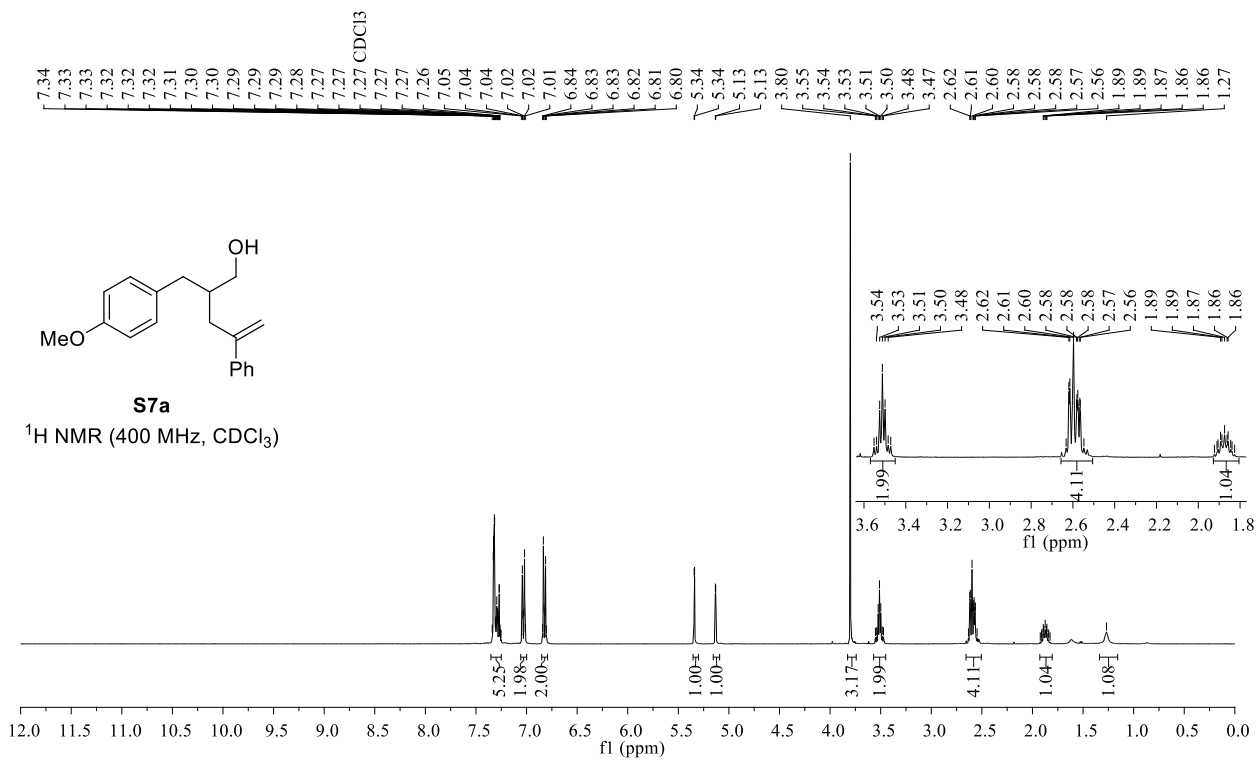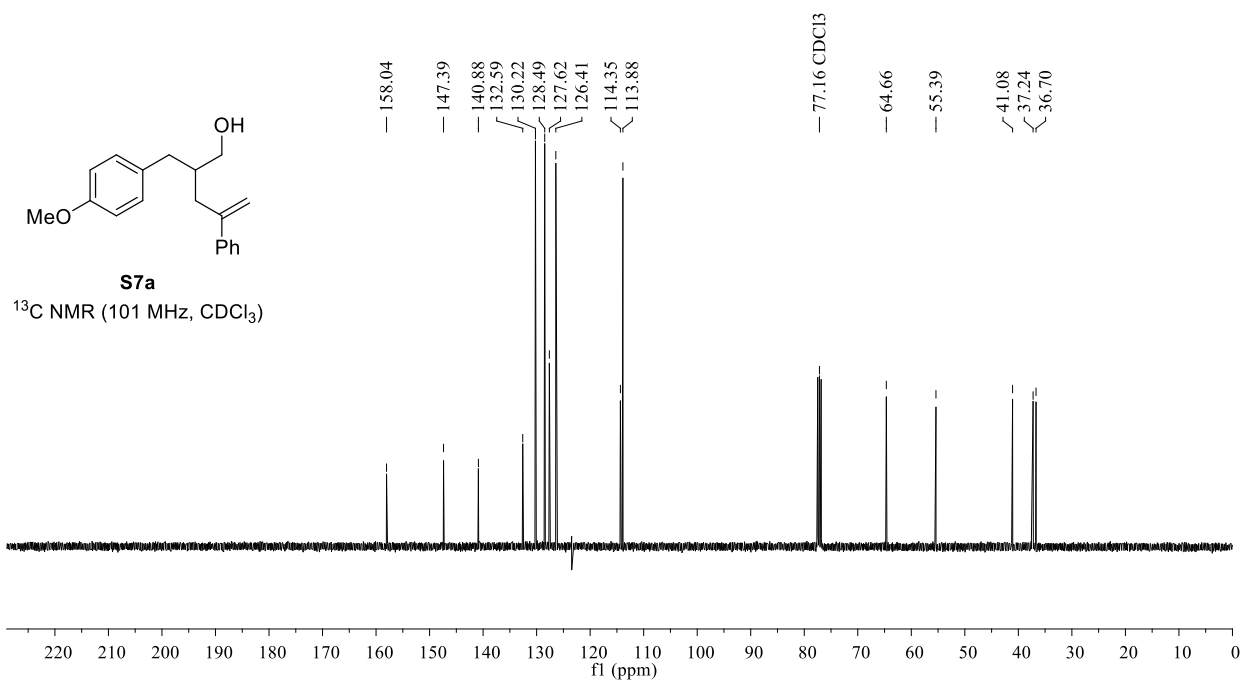



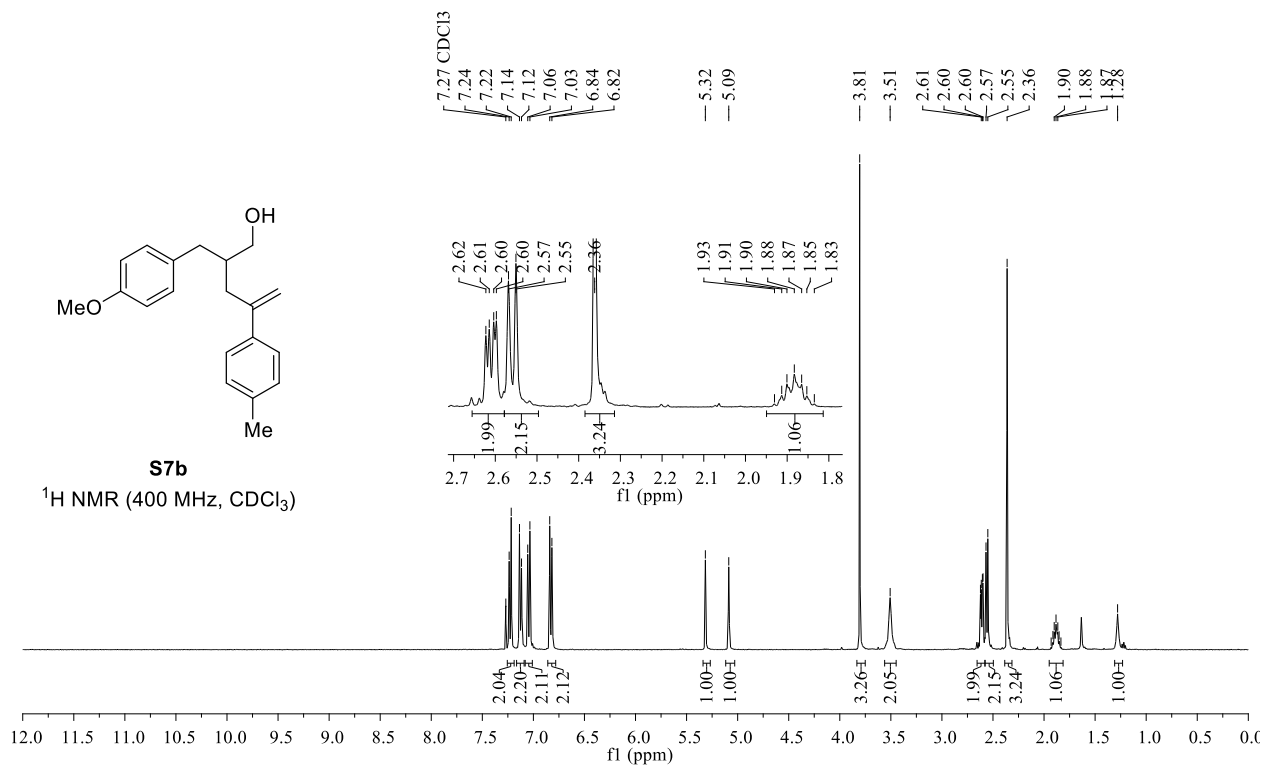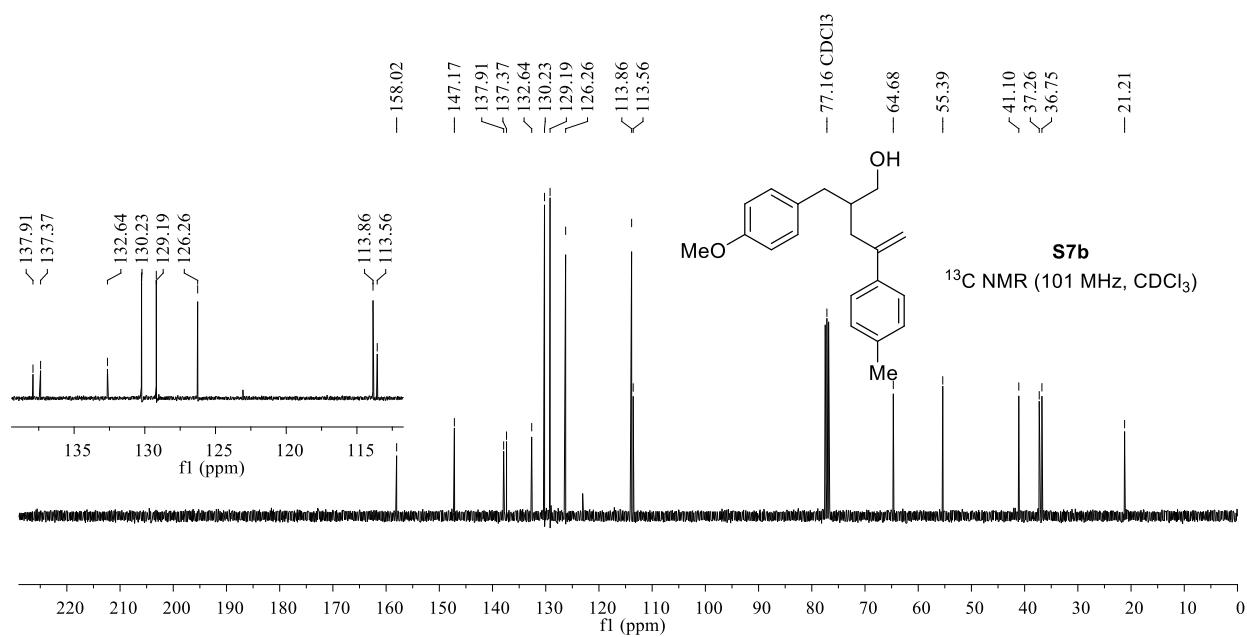

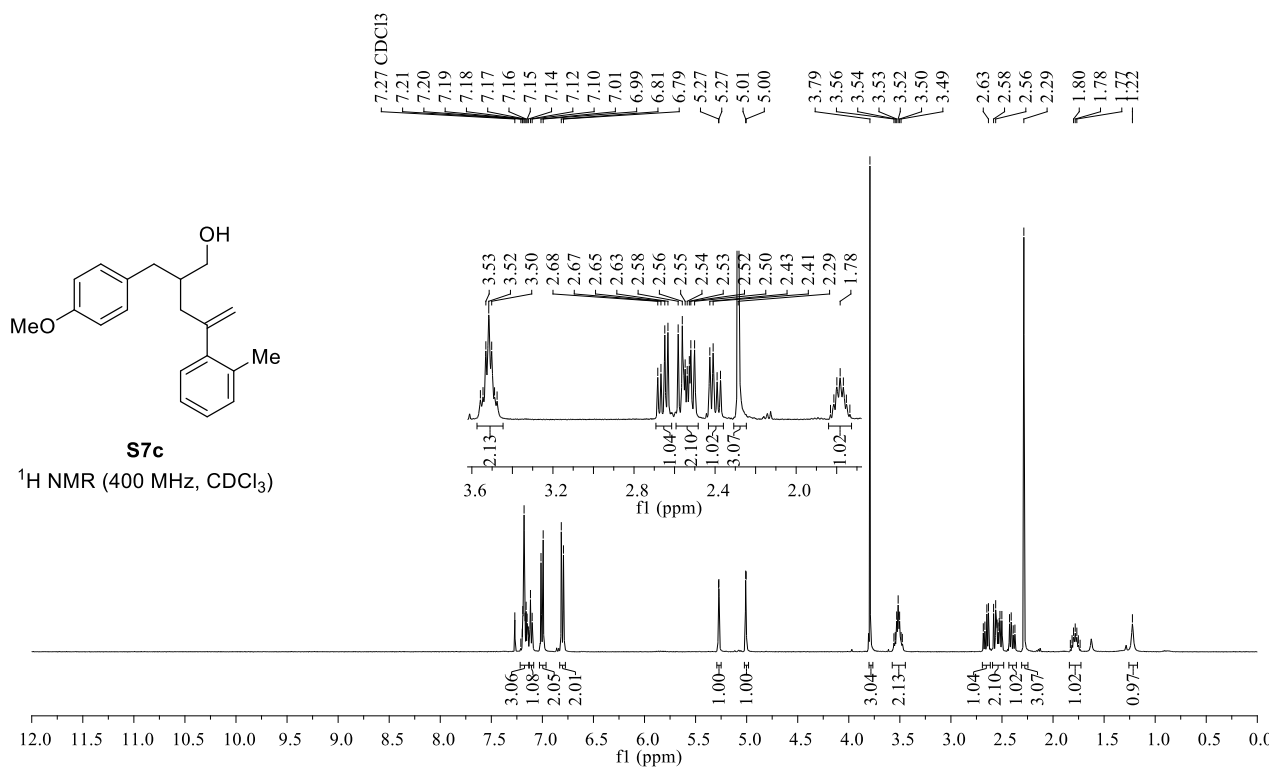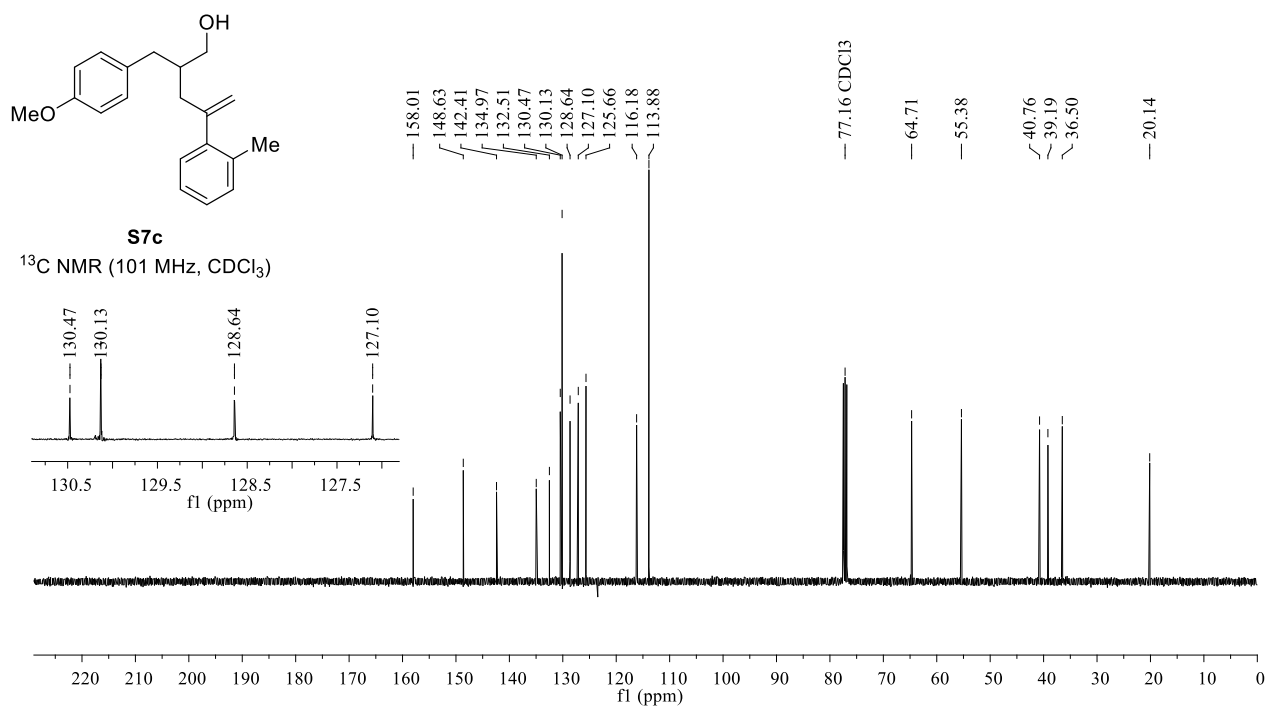

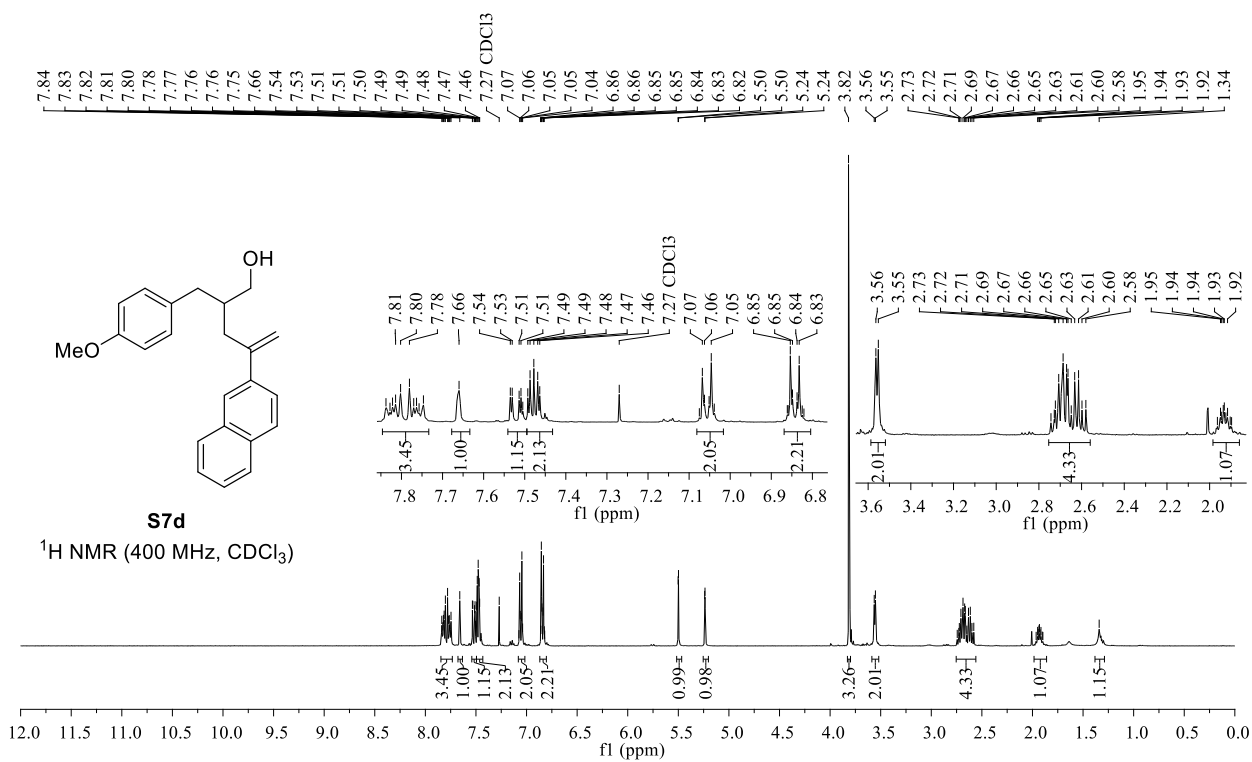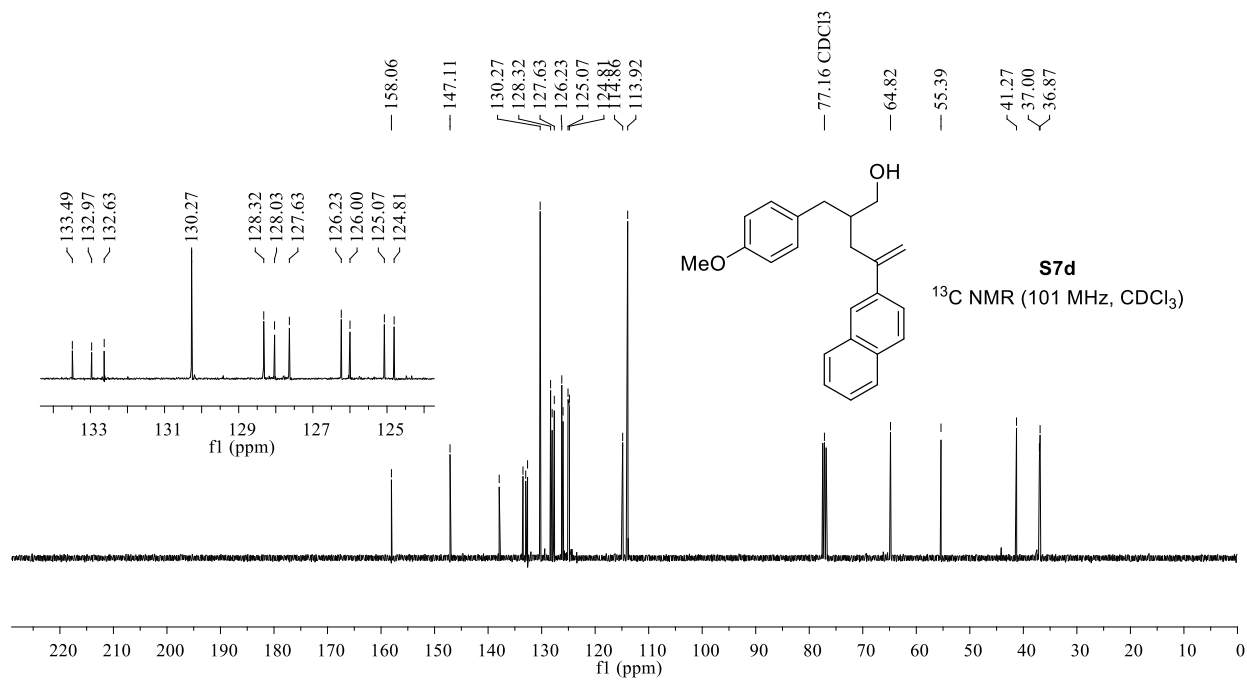

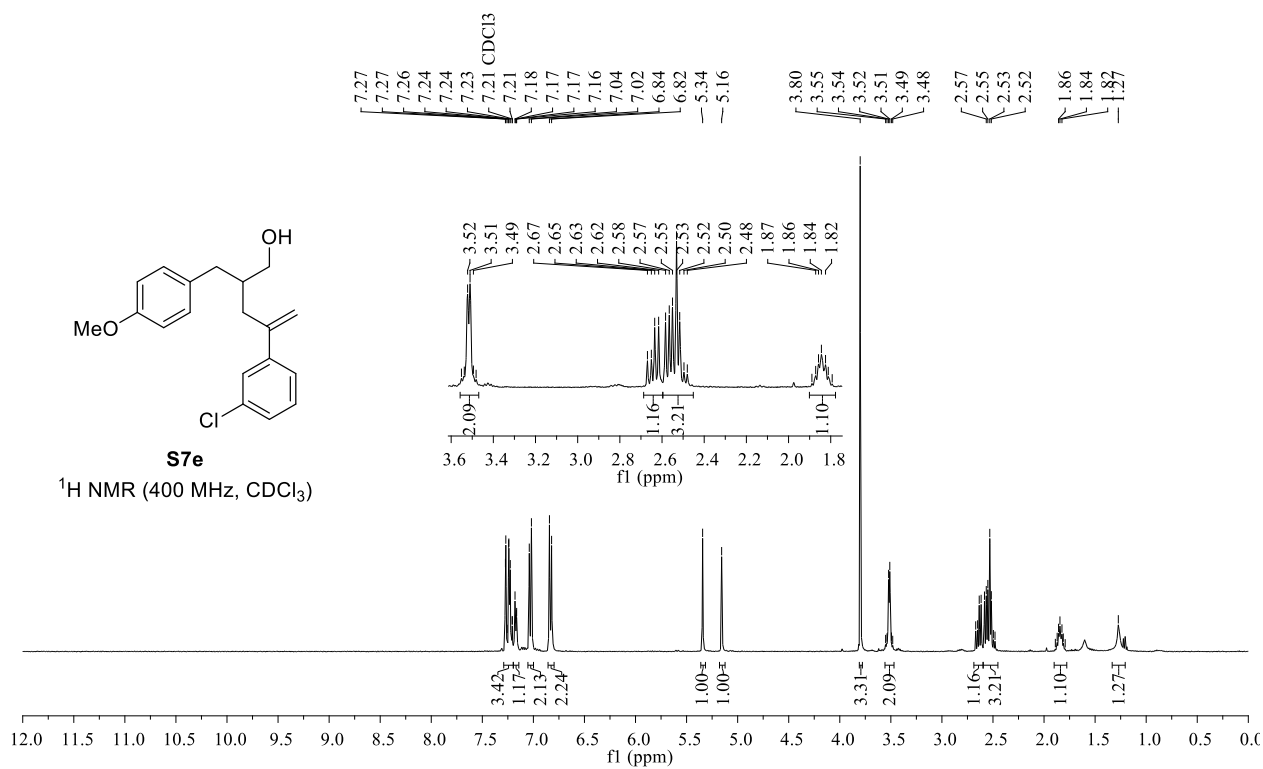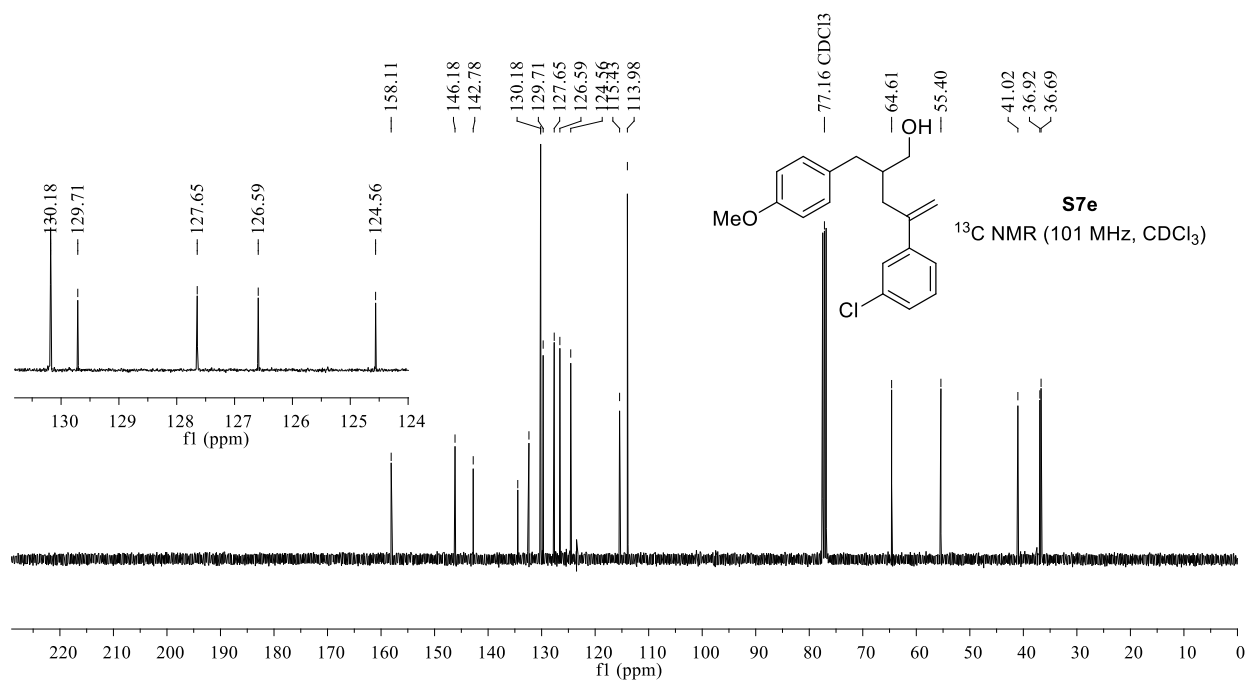

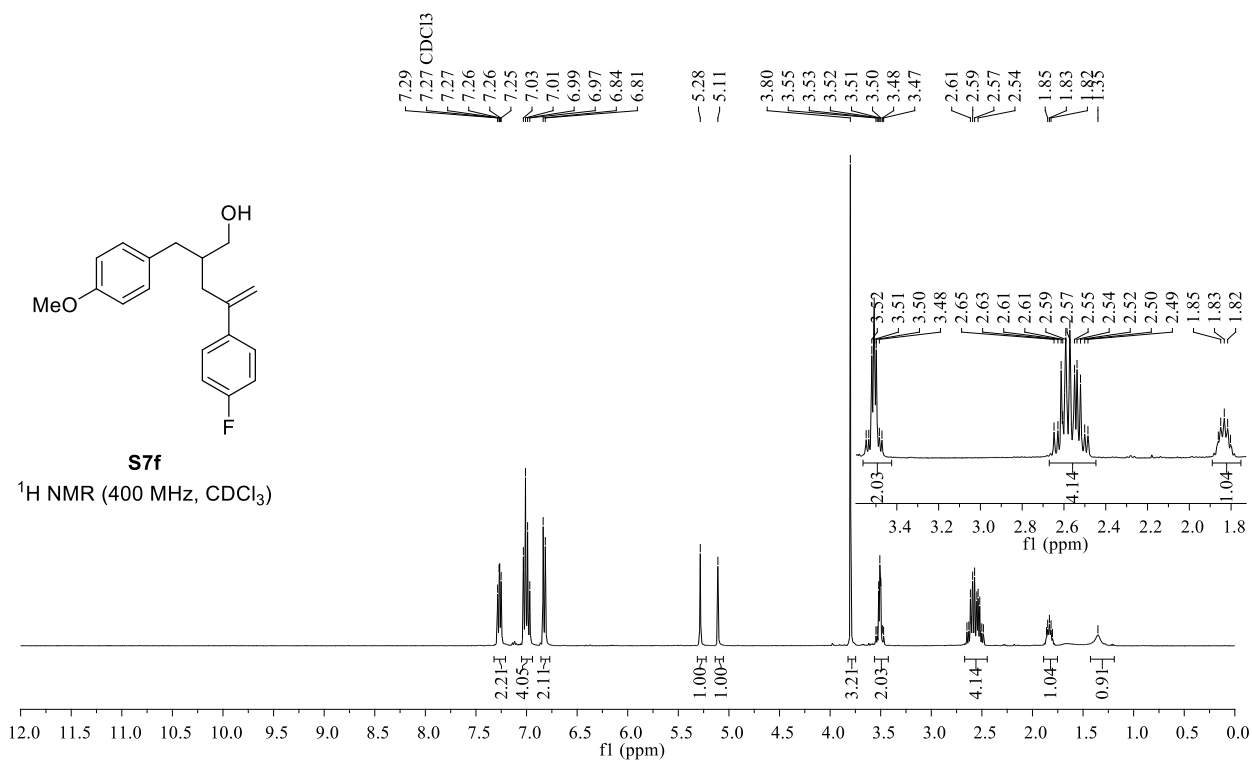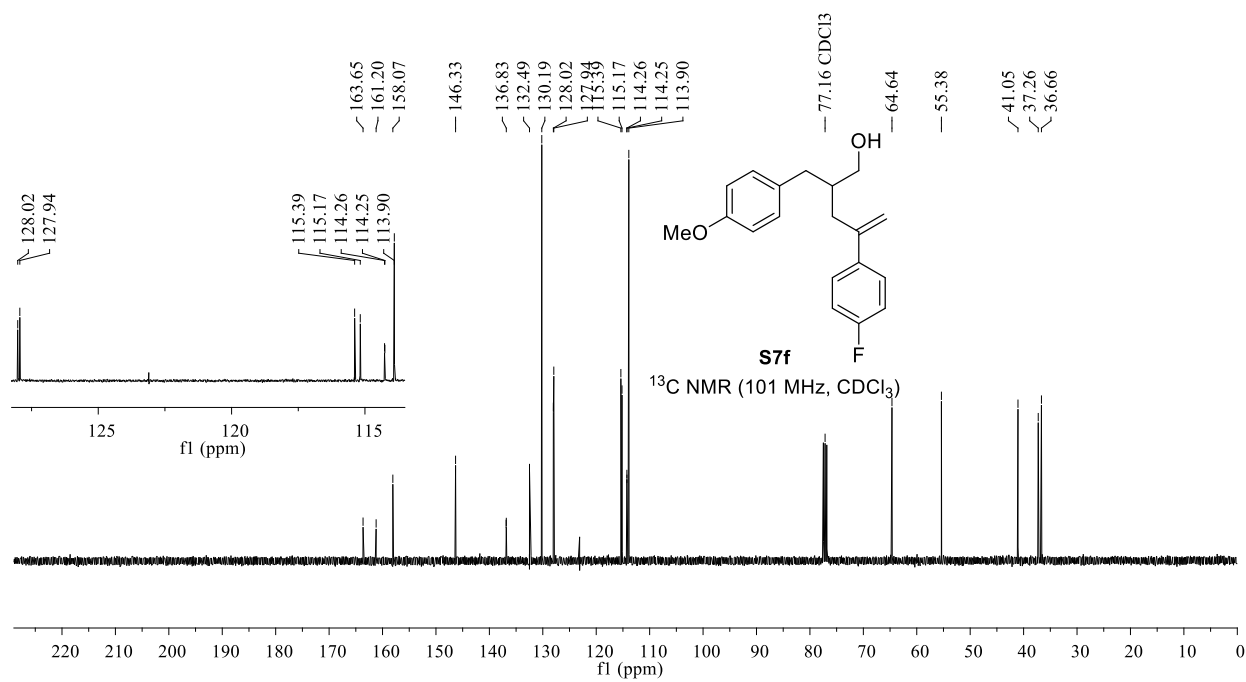

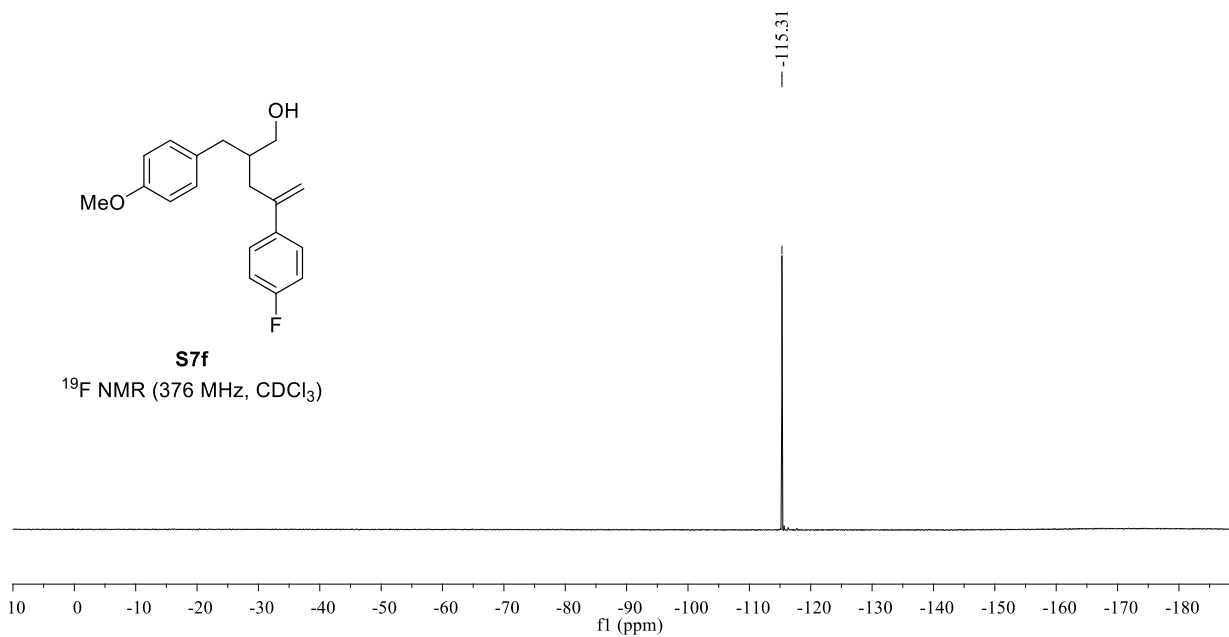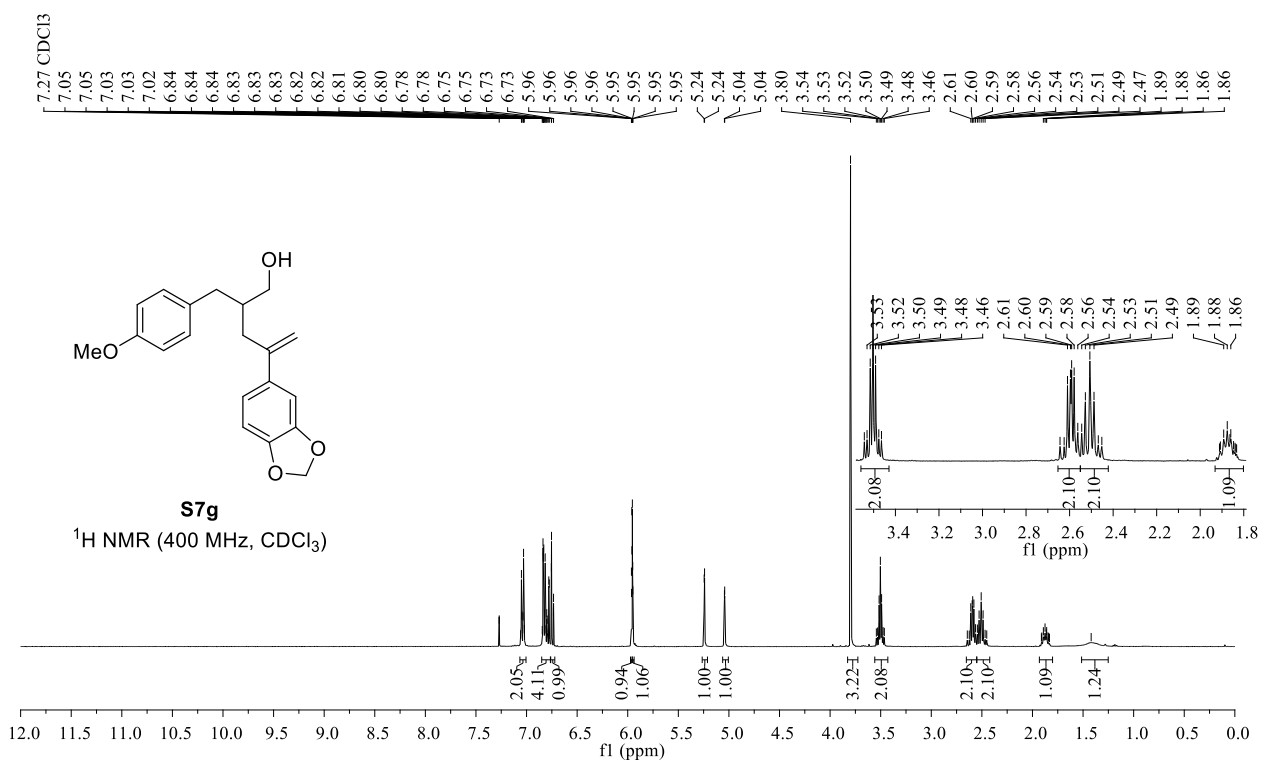

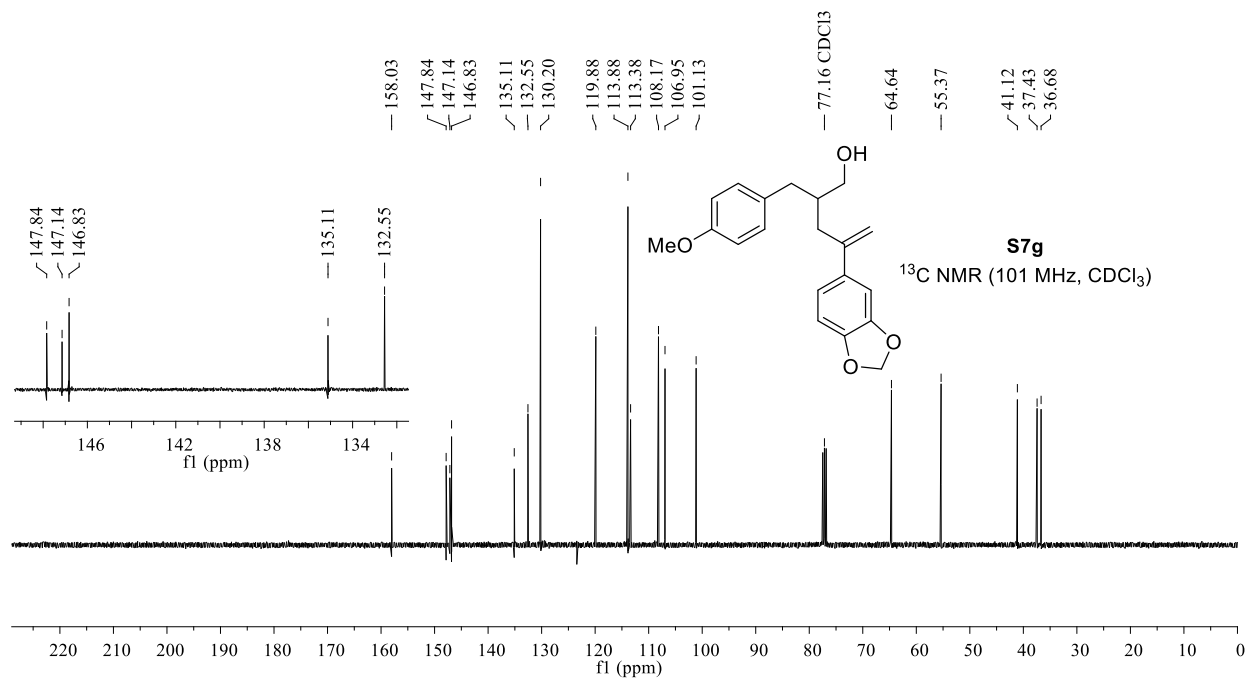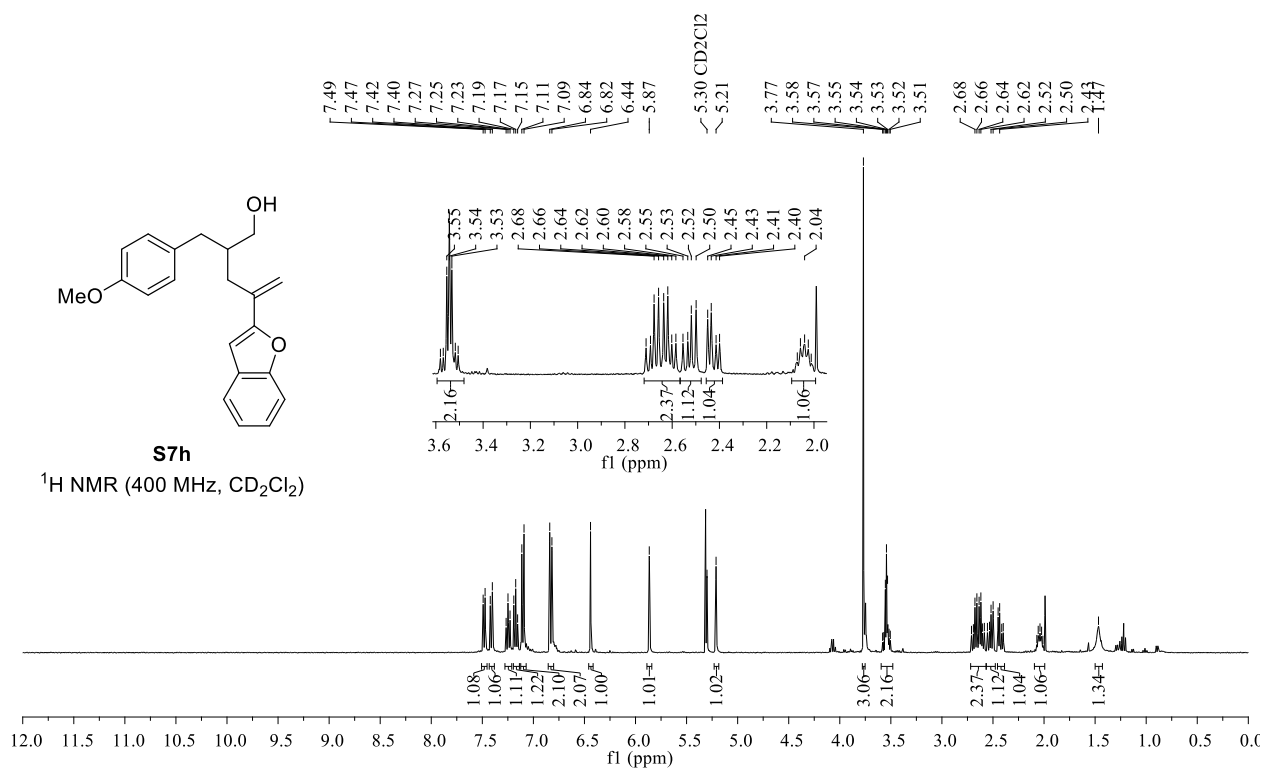

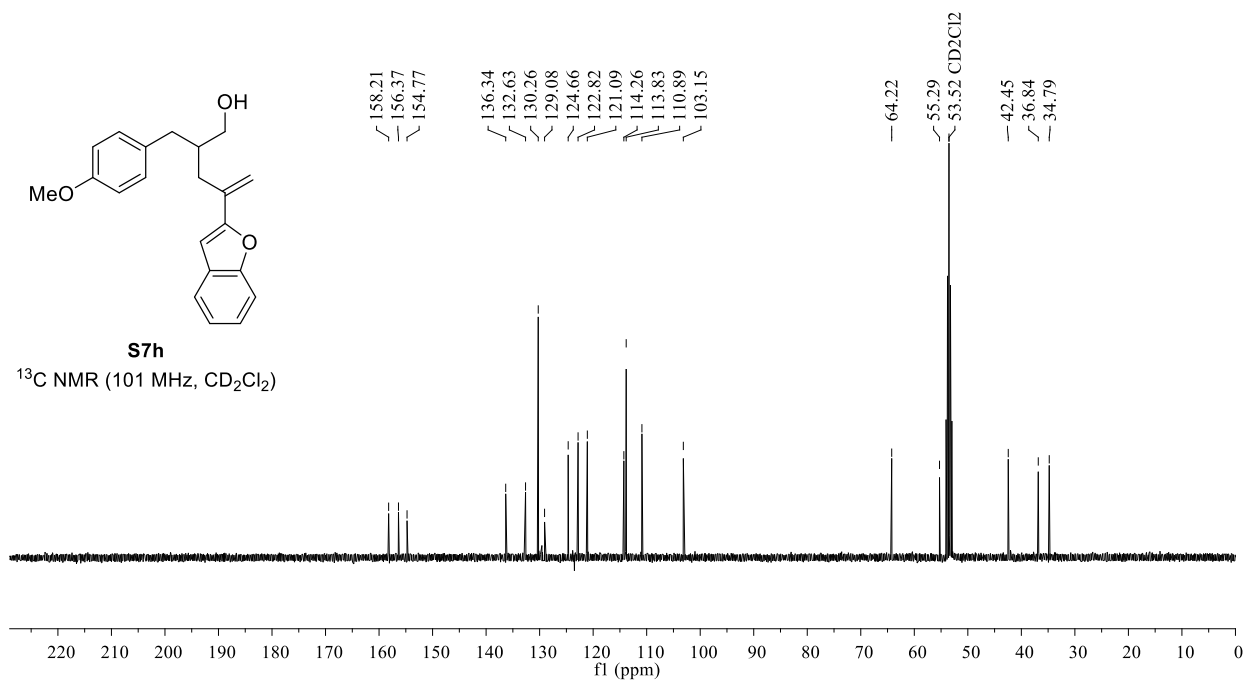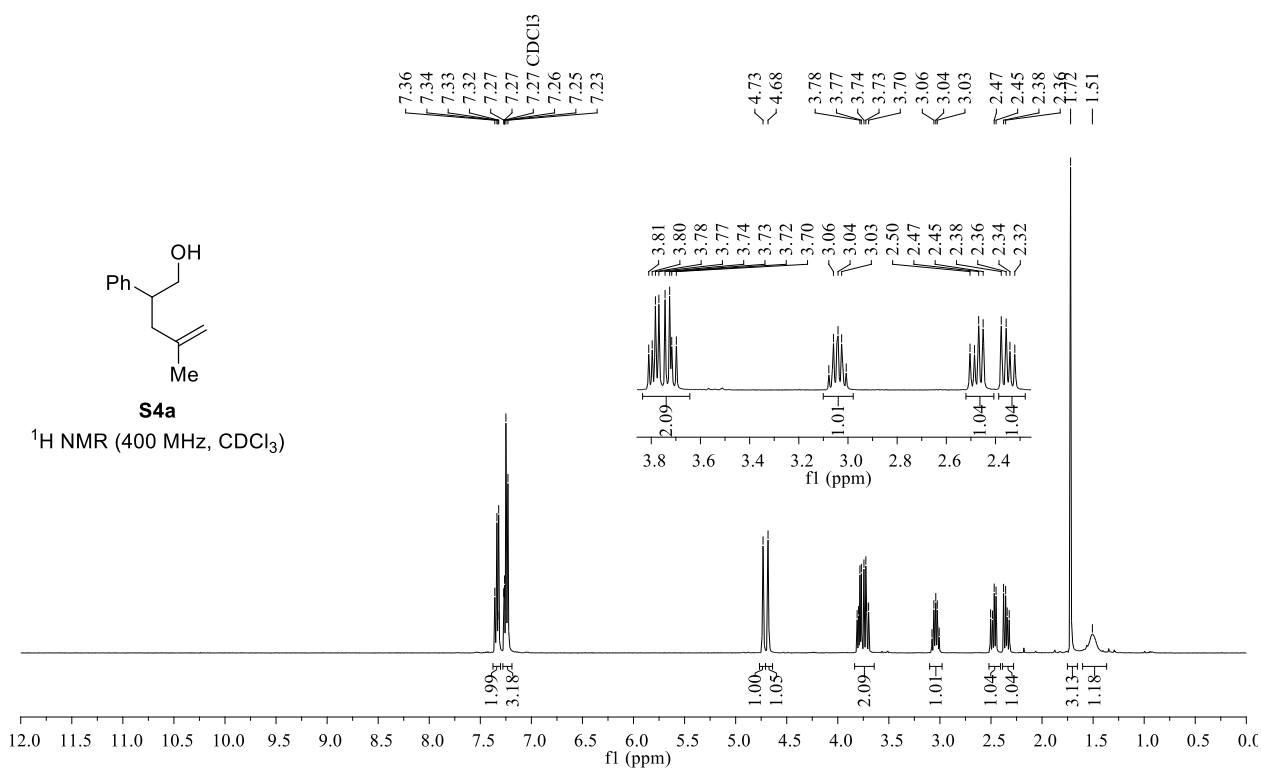



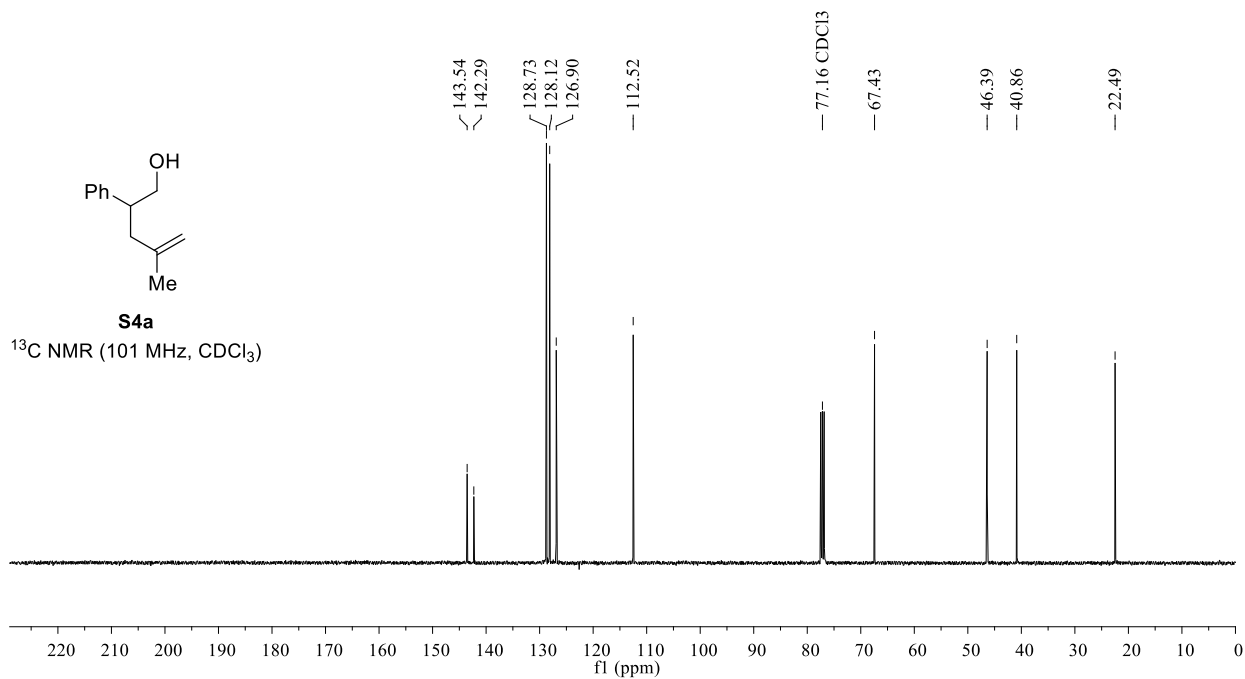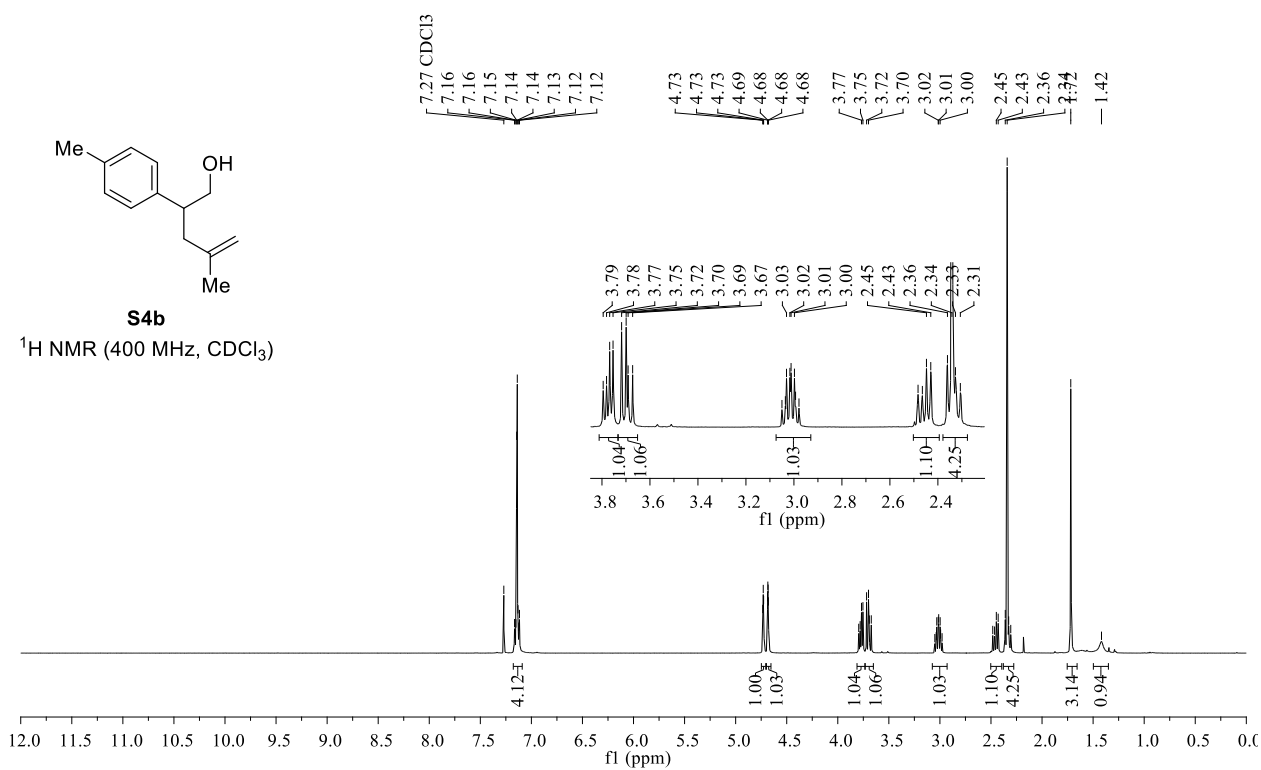

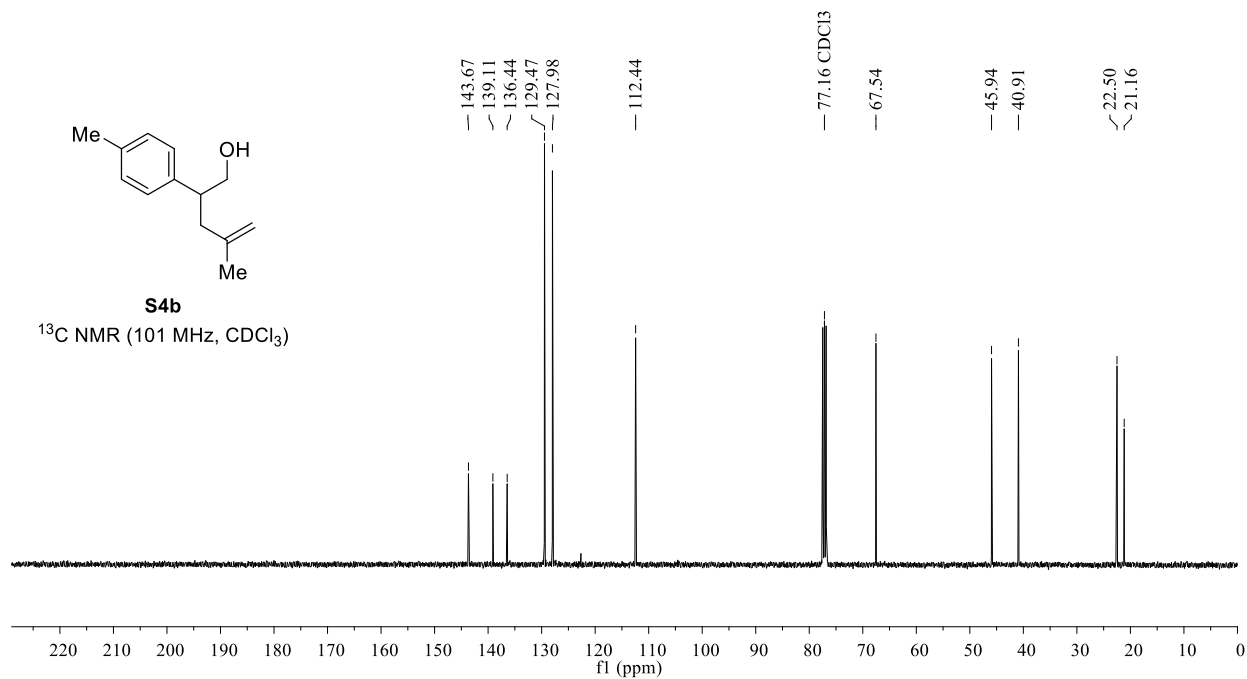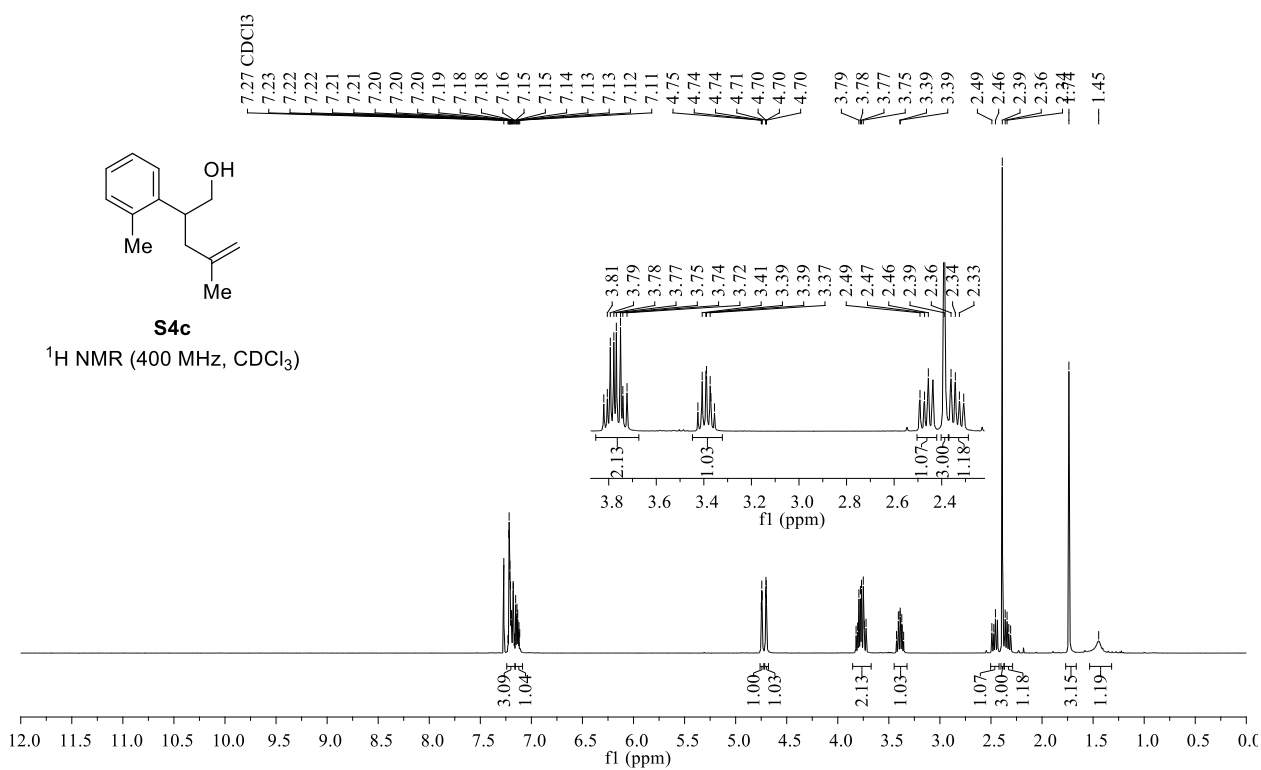

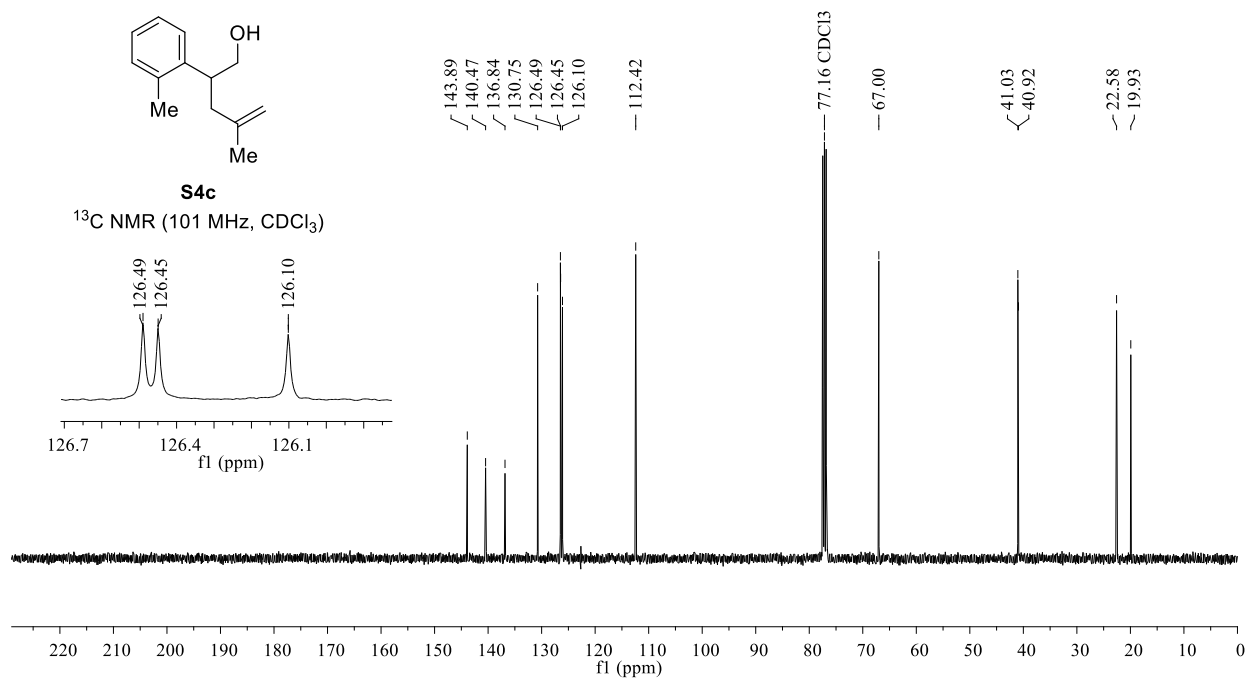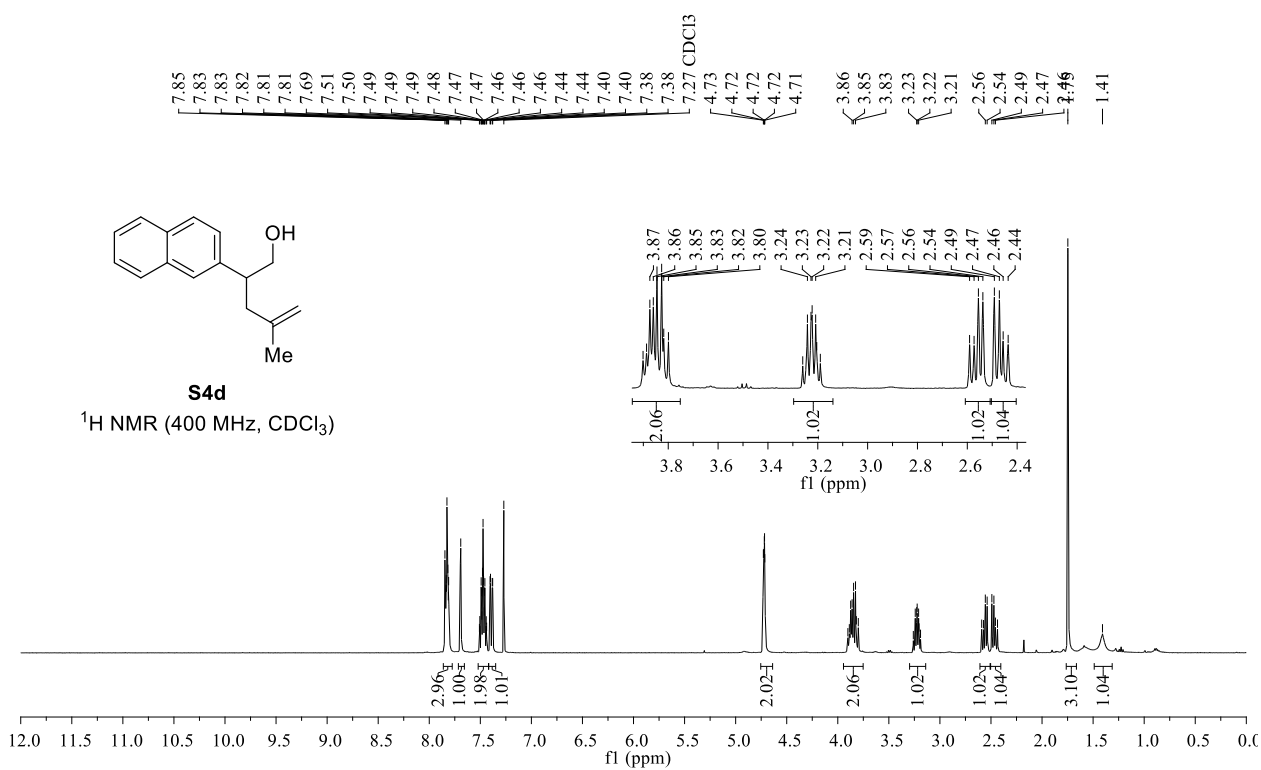

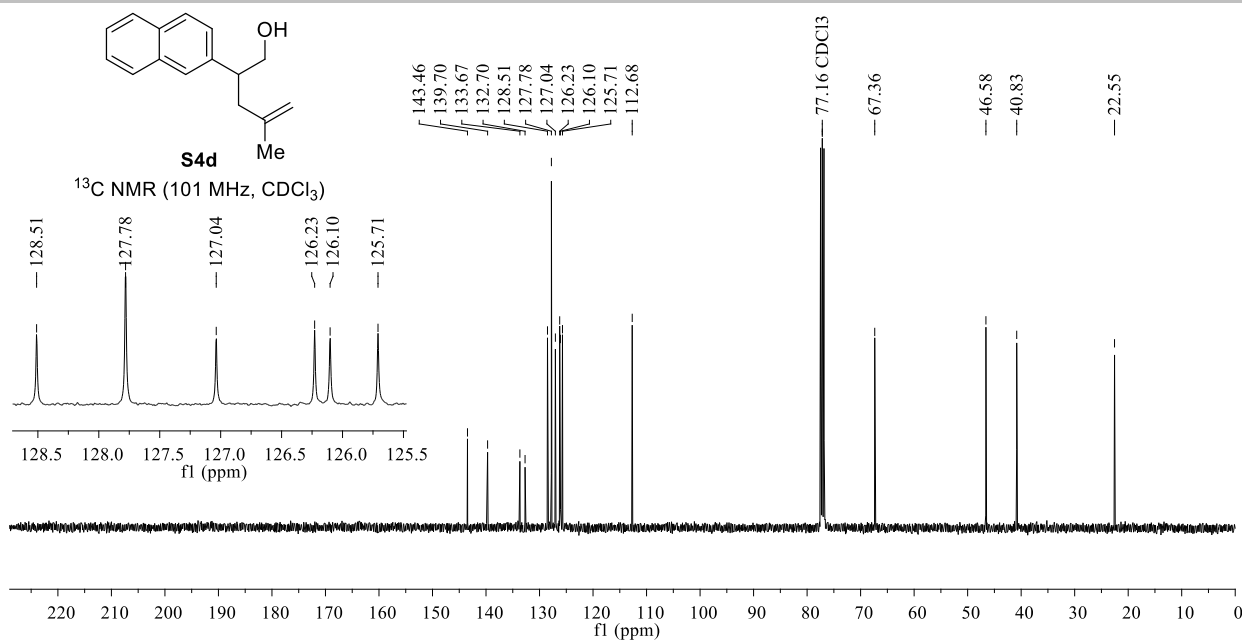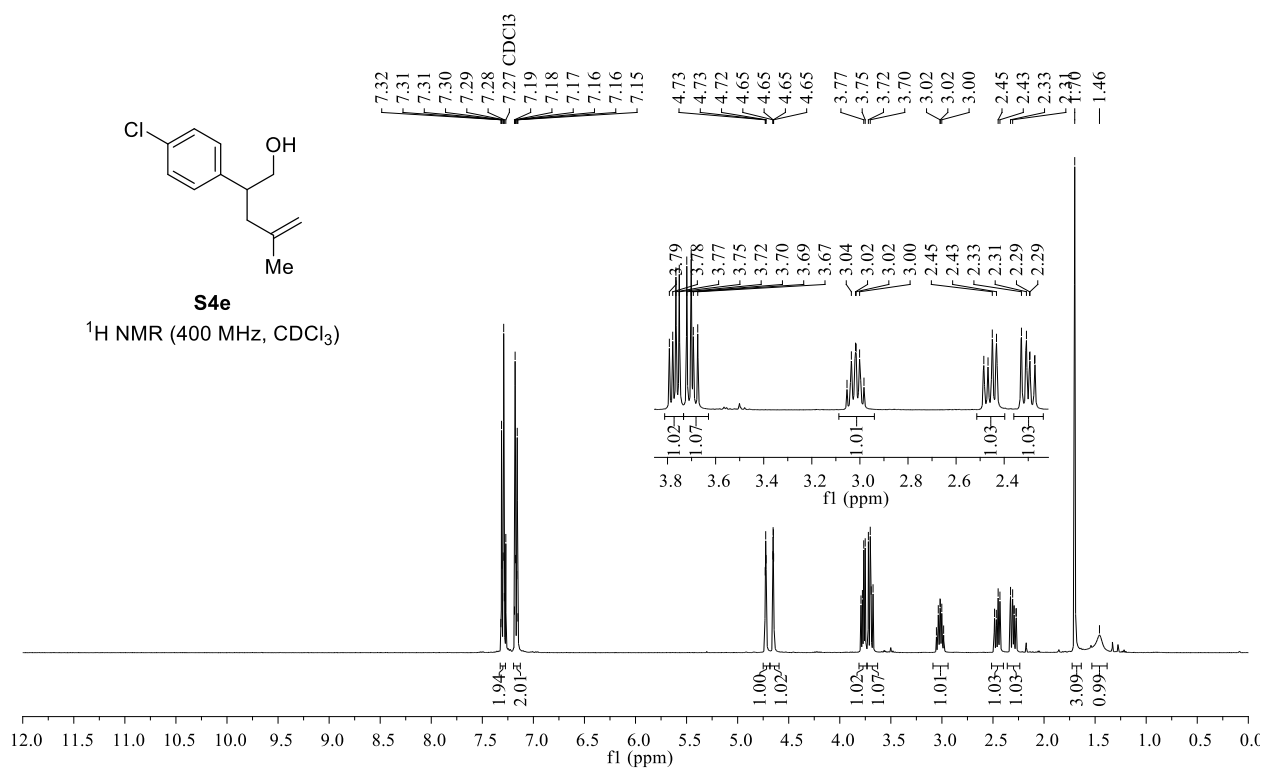

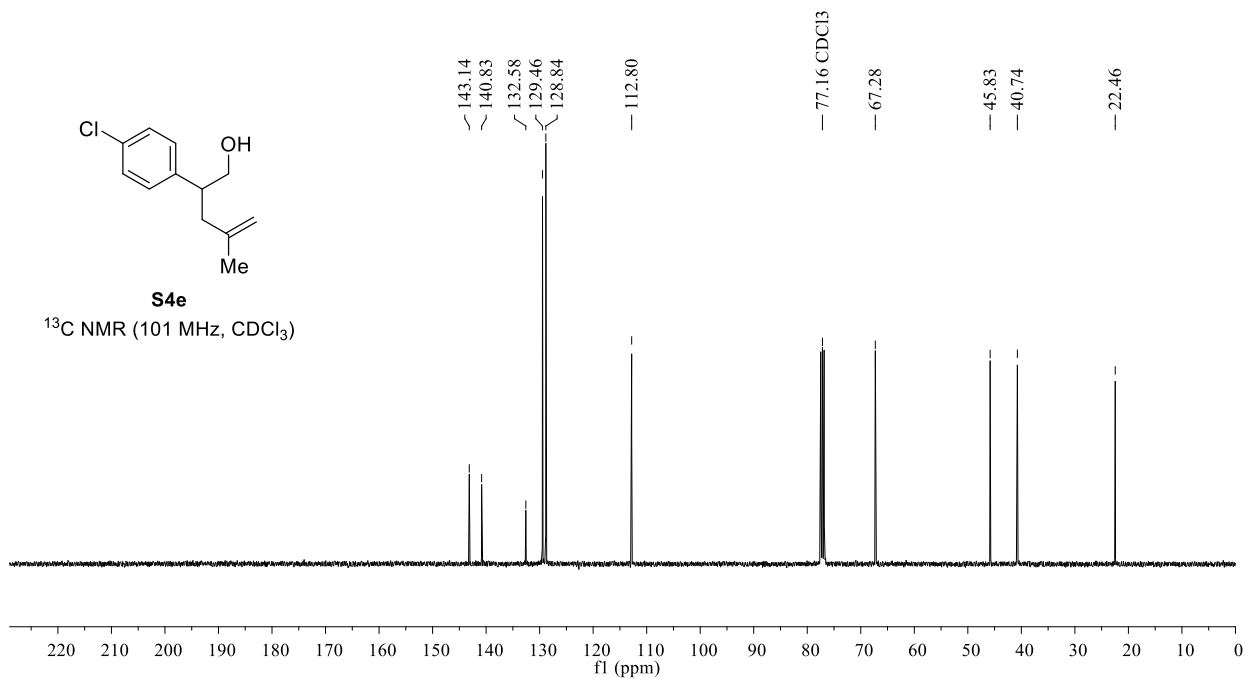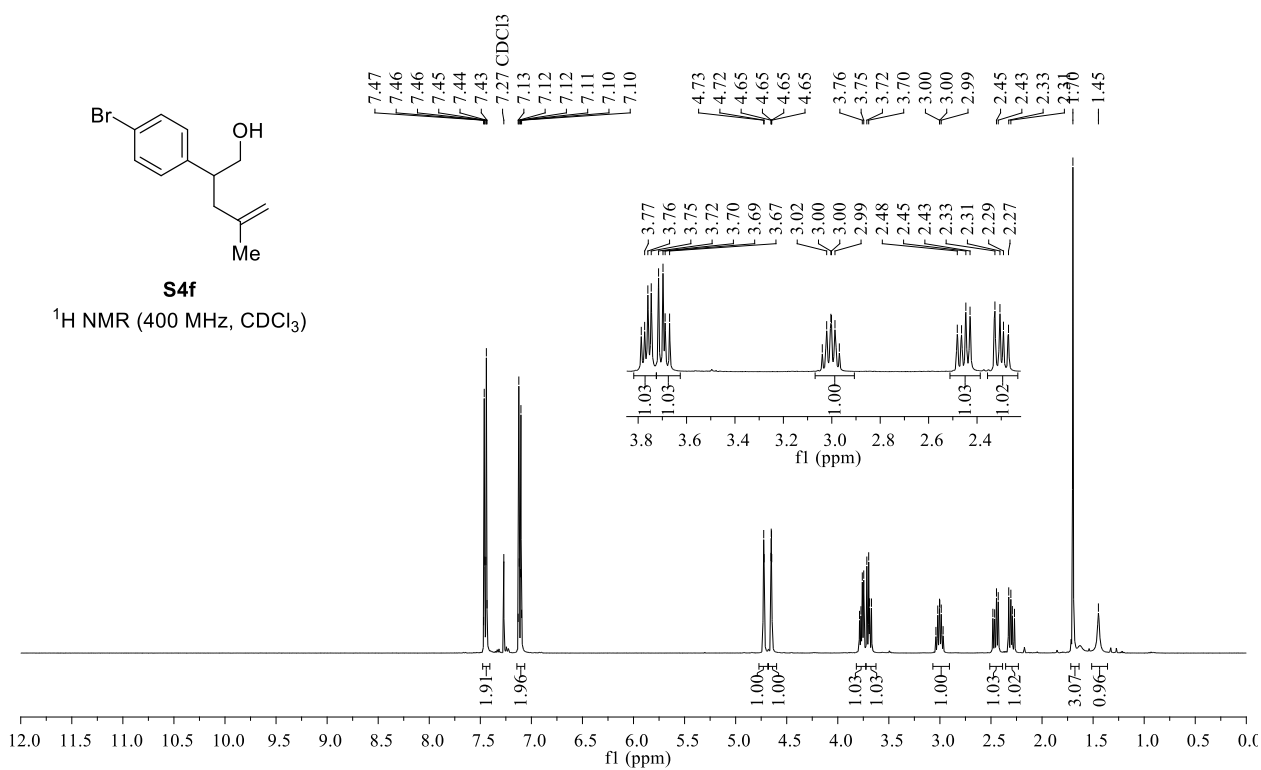

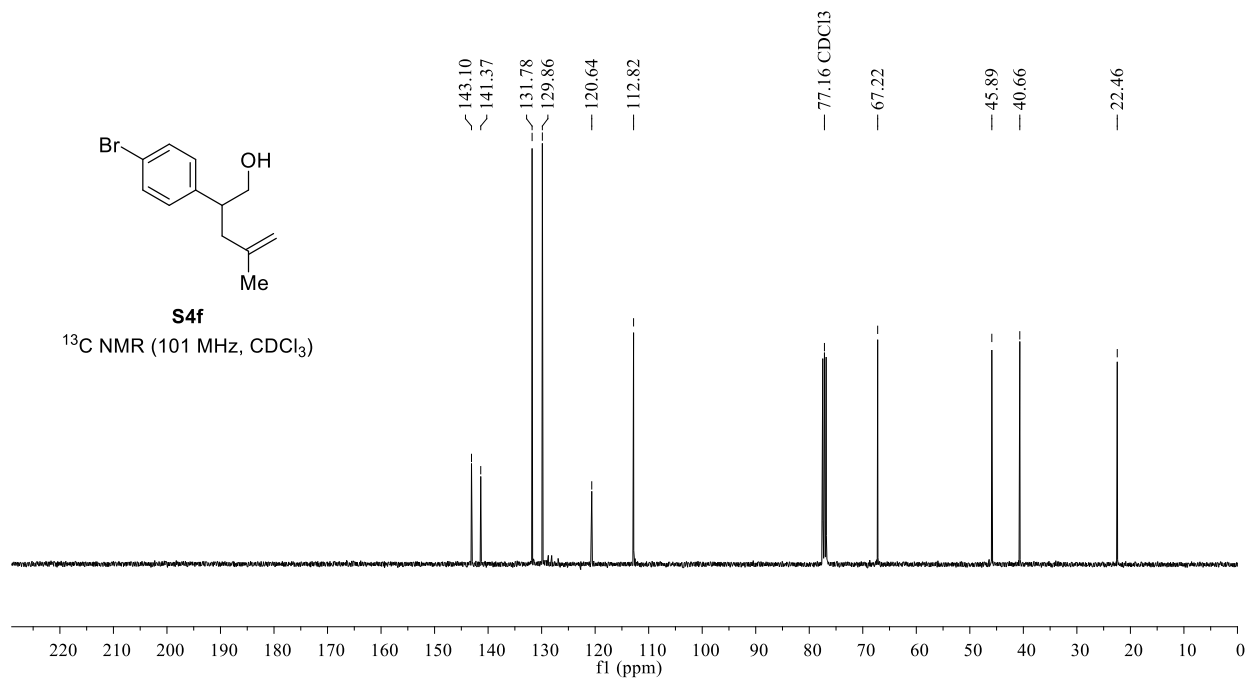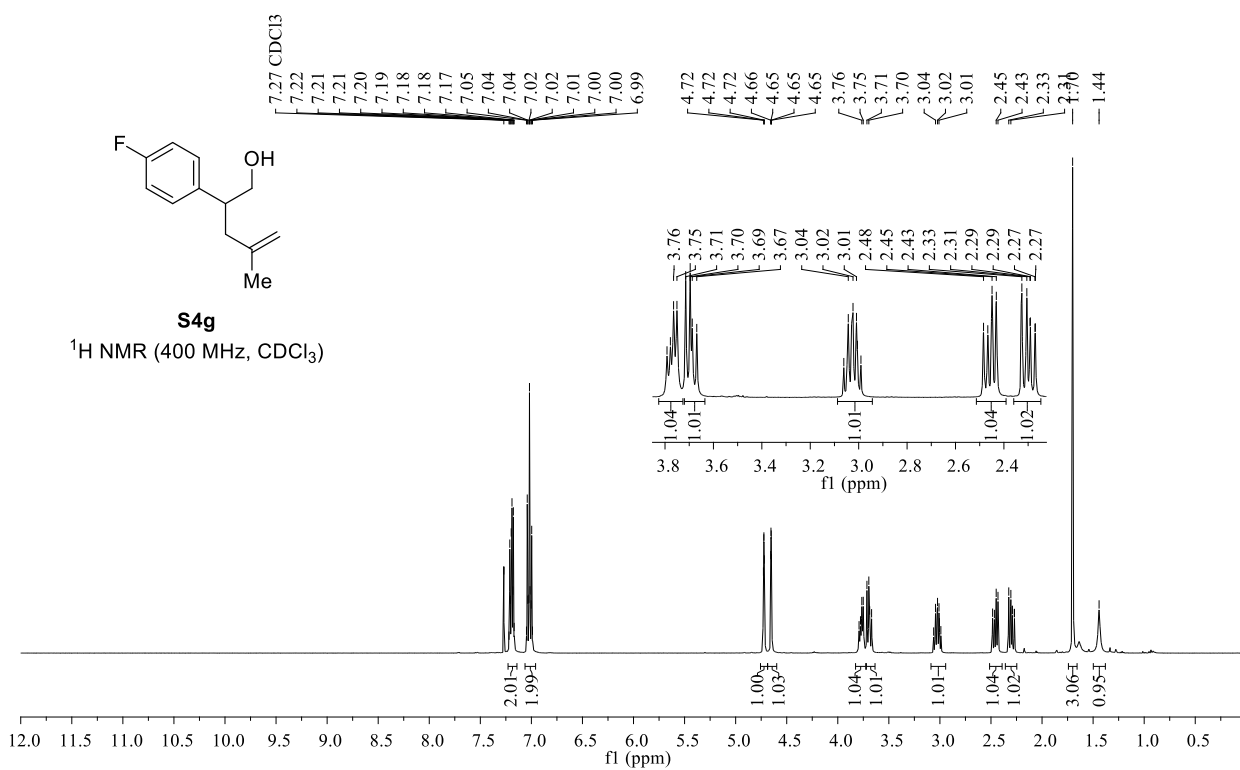

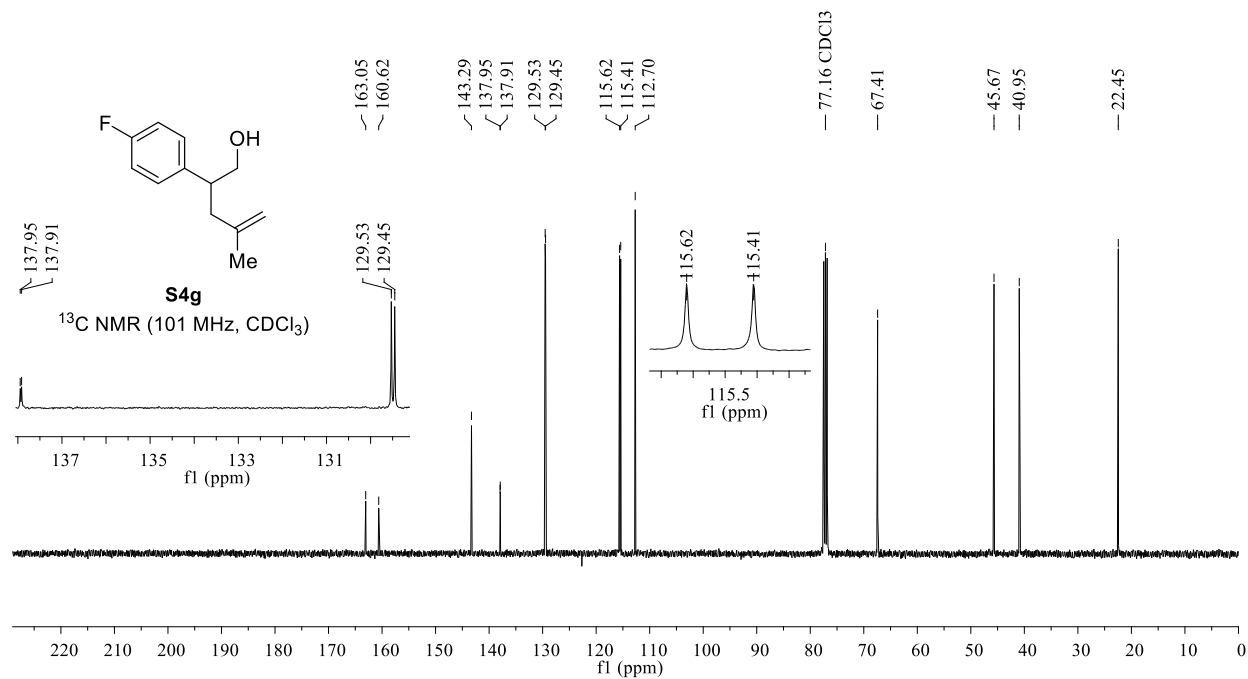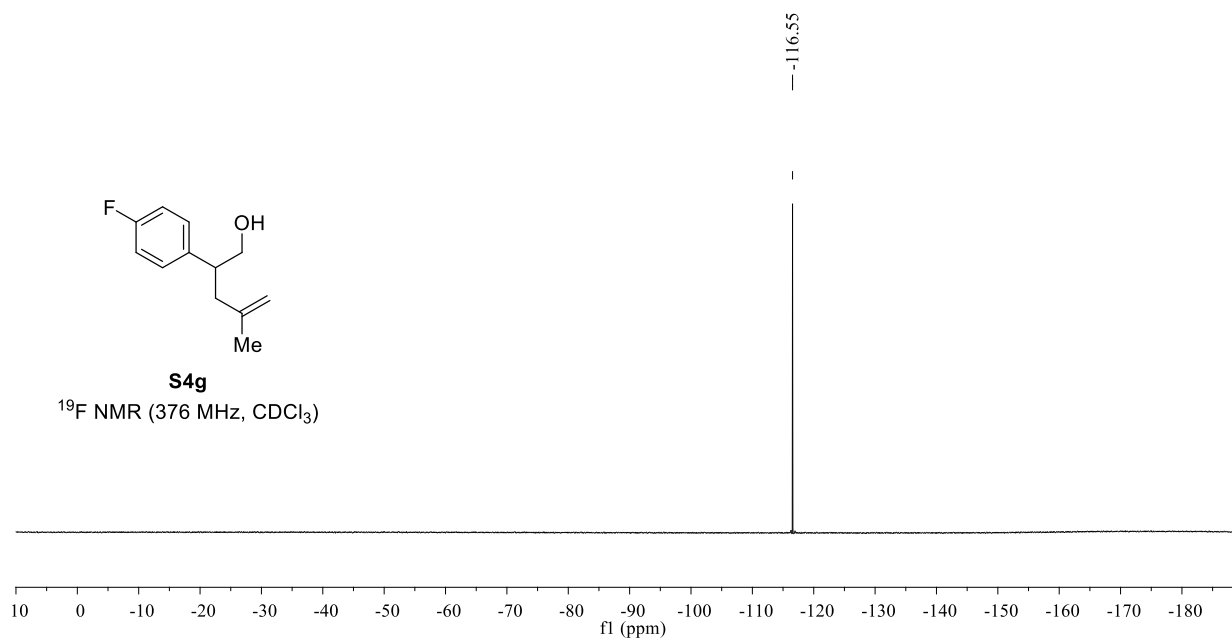

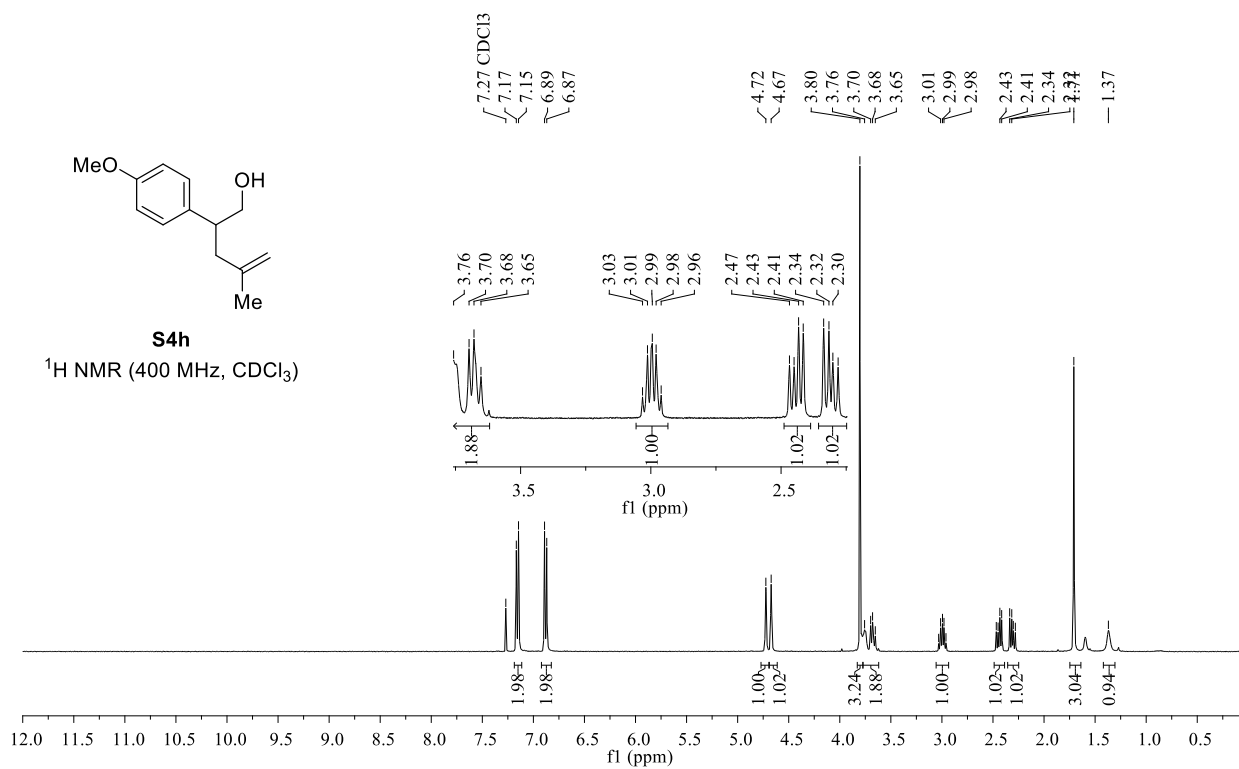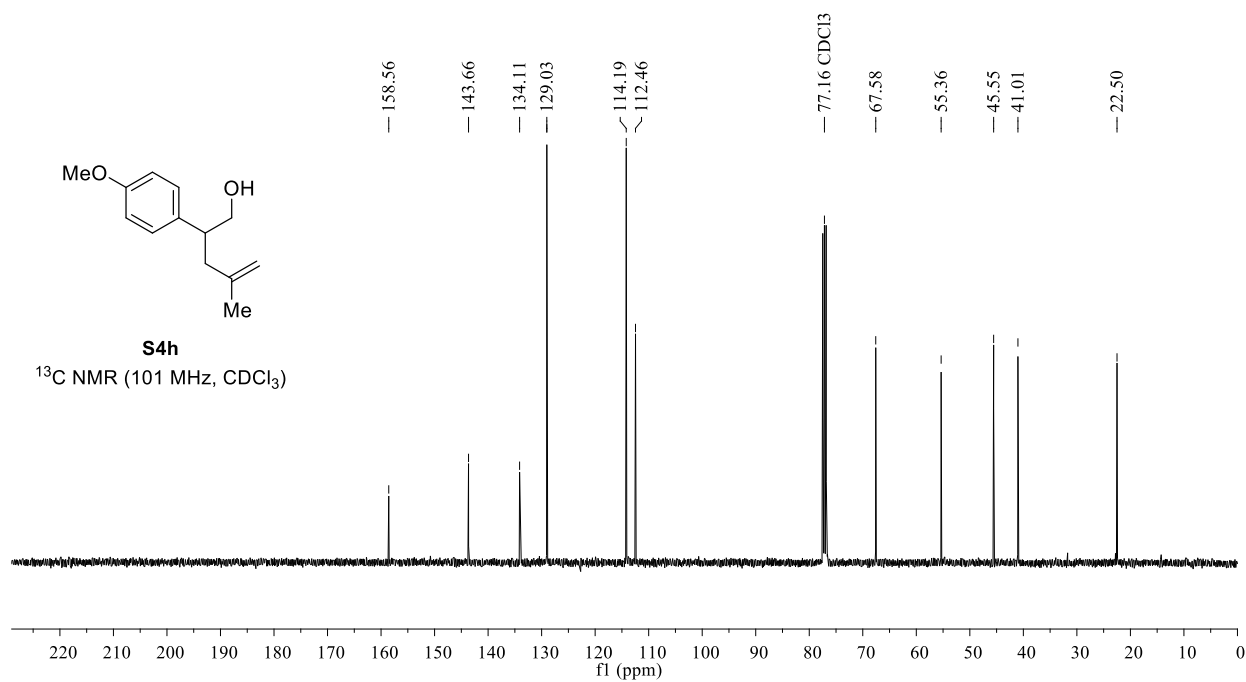



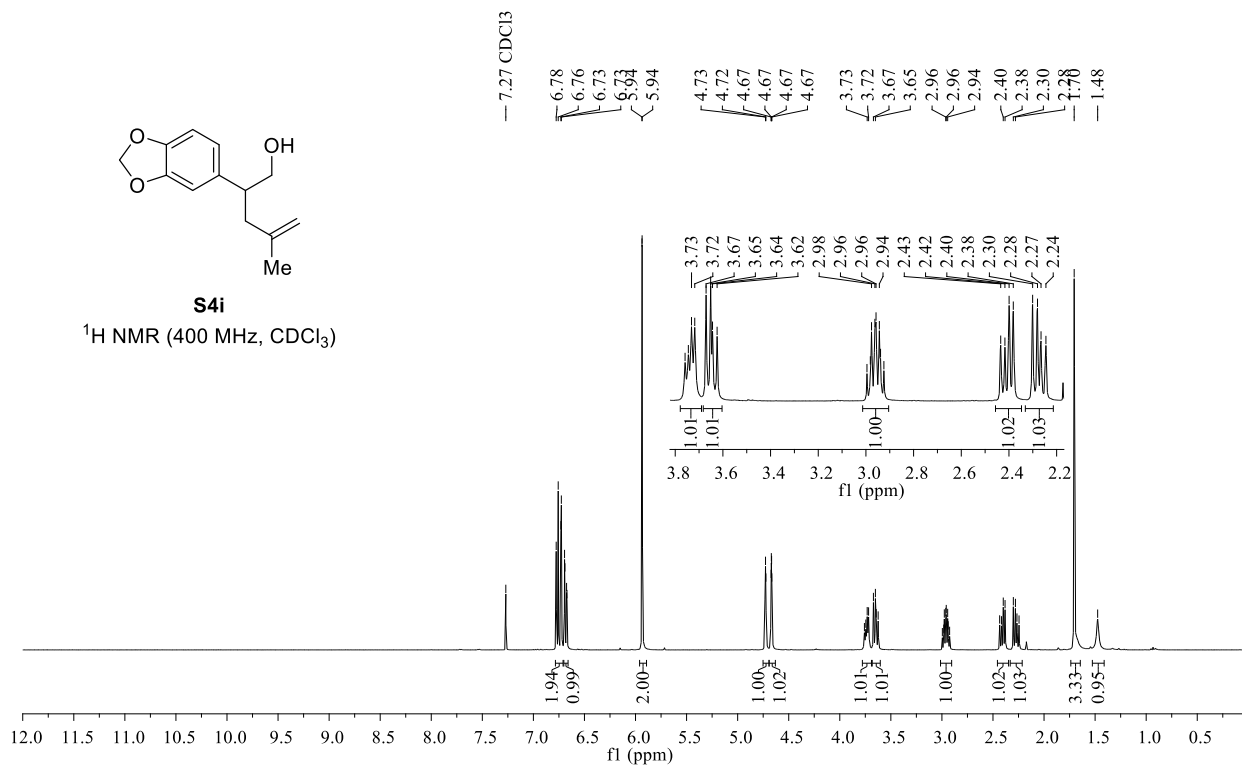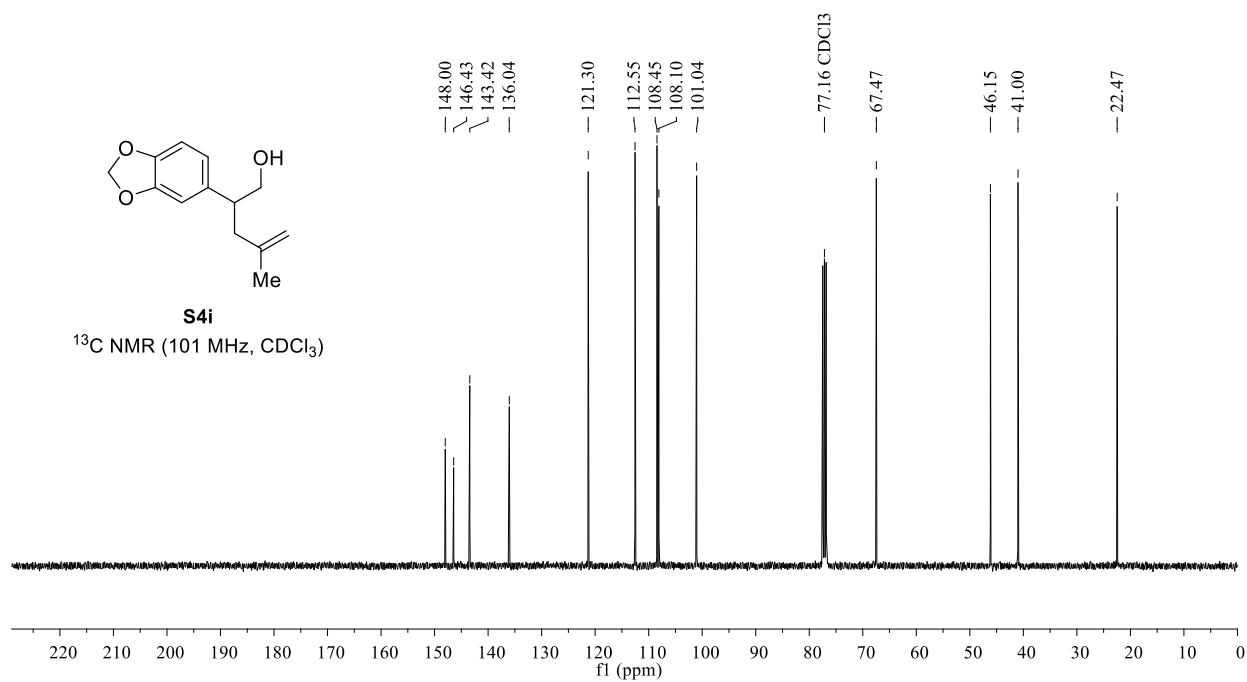

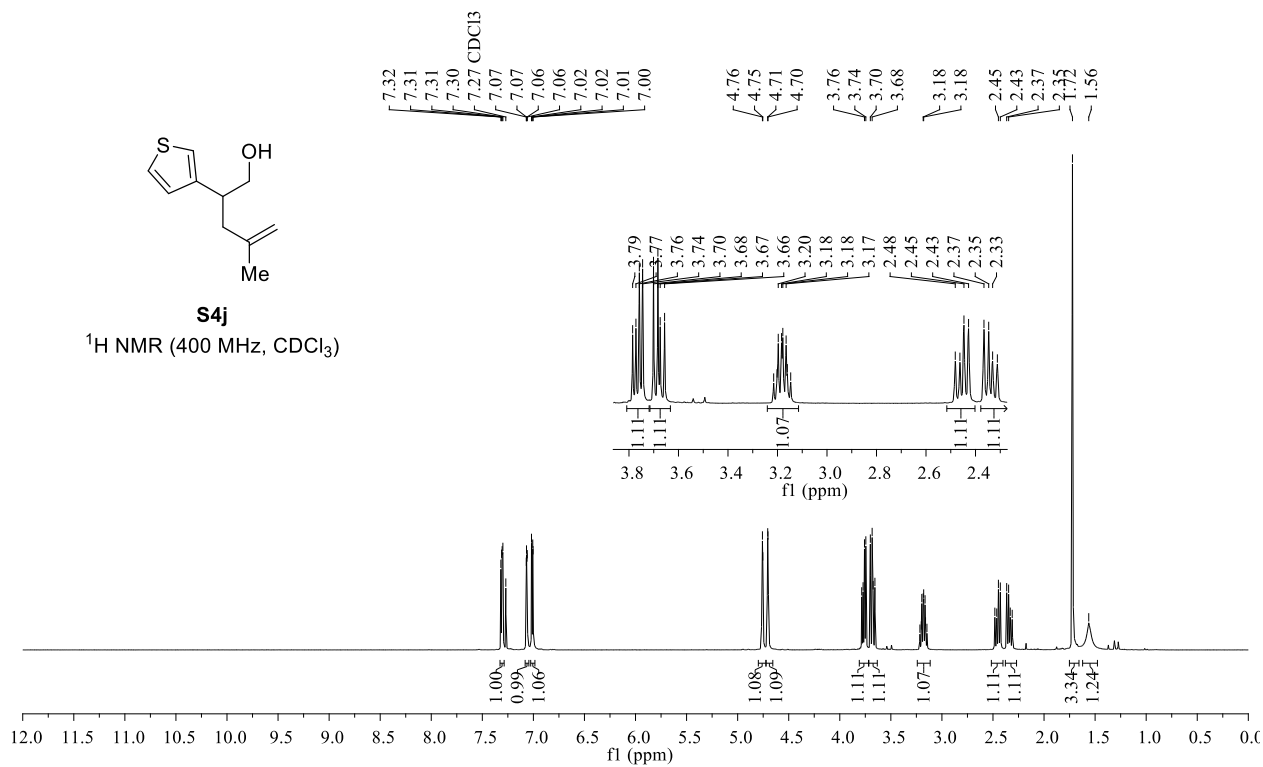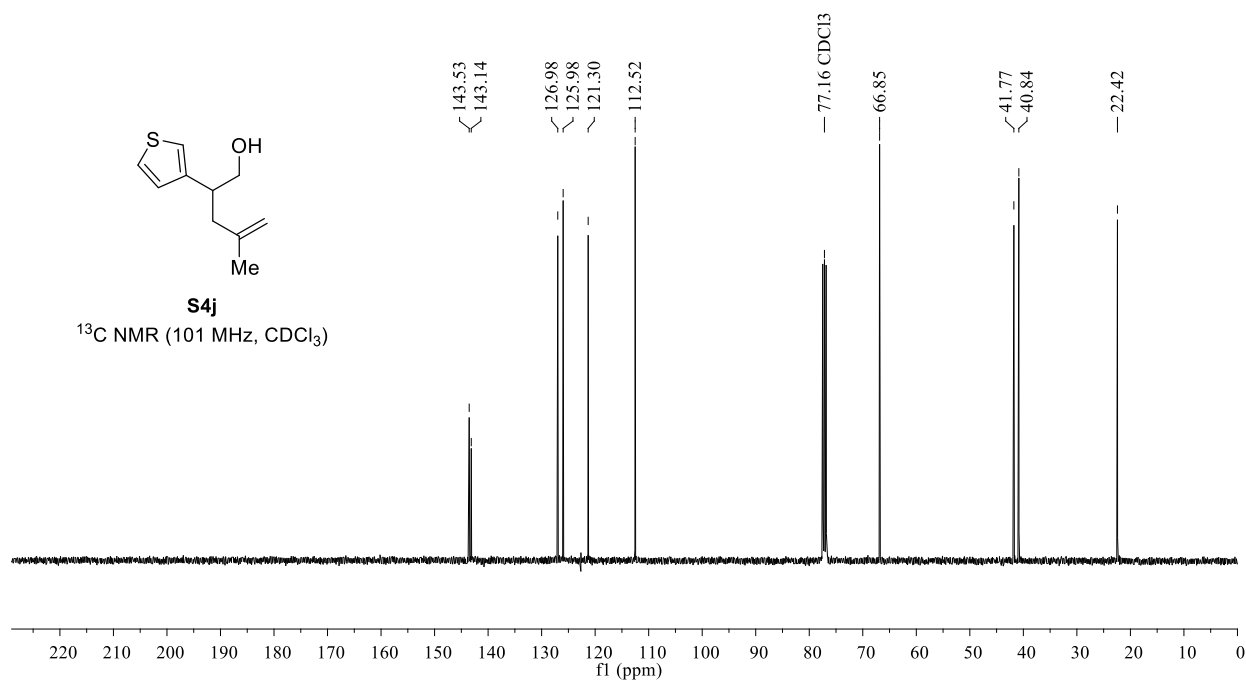

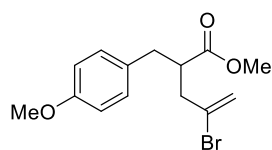**S5** $^1\text{H NMR}$  (400 MHz,  $\text{CDCl}_3$ )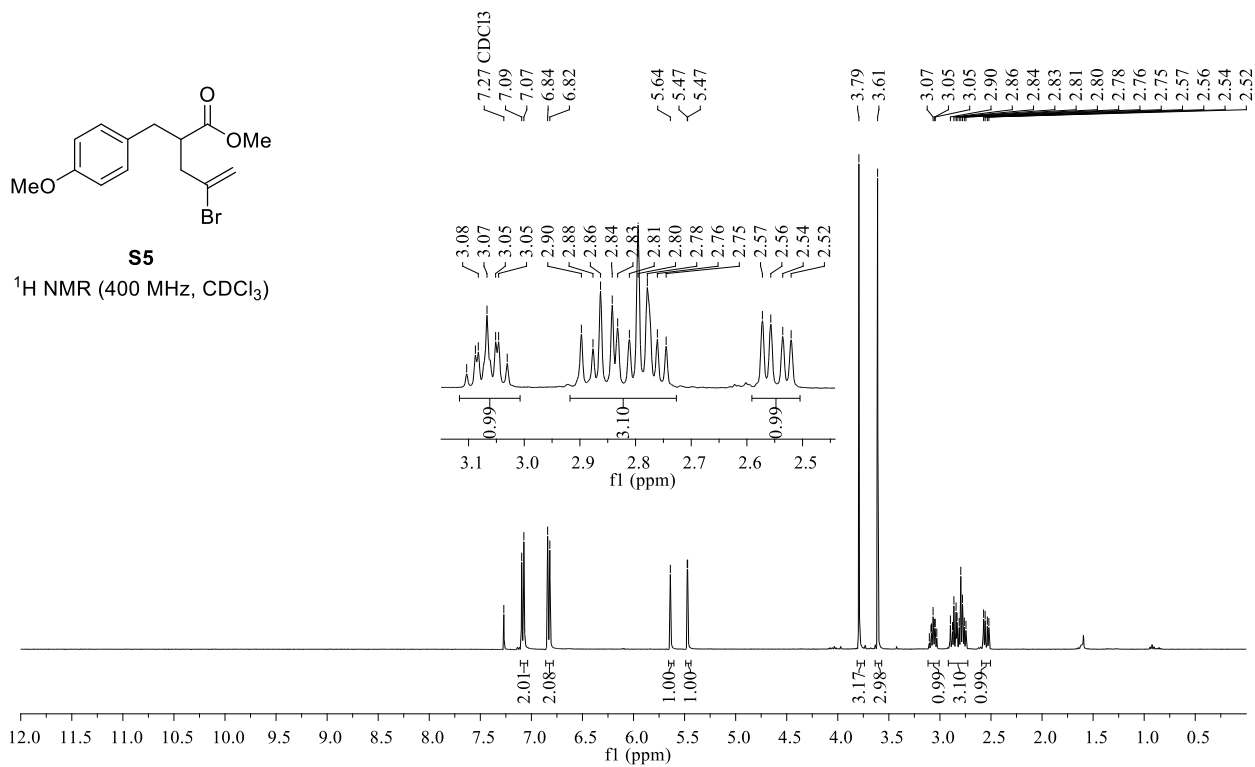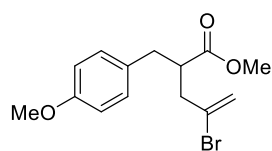**S5** $^{13}\text{C NMR}$  (101 MHz,  $\text{CDCl}_3$ )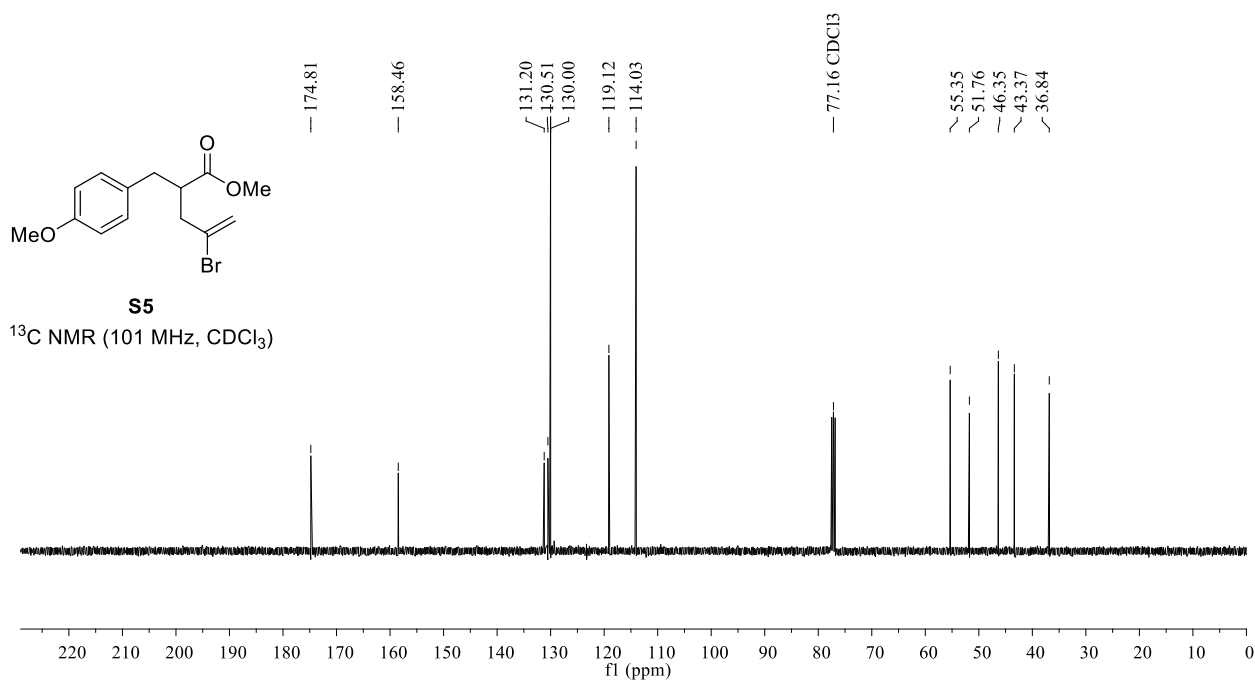

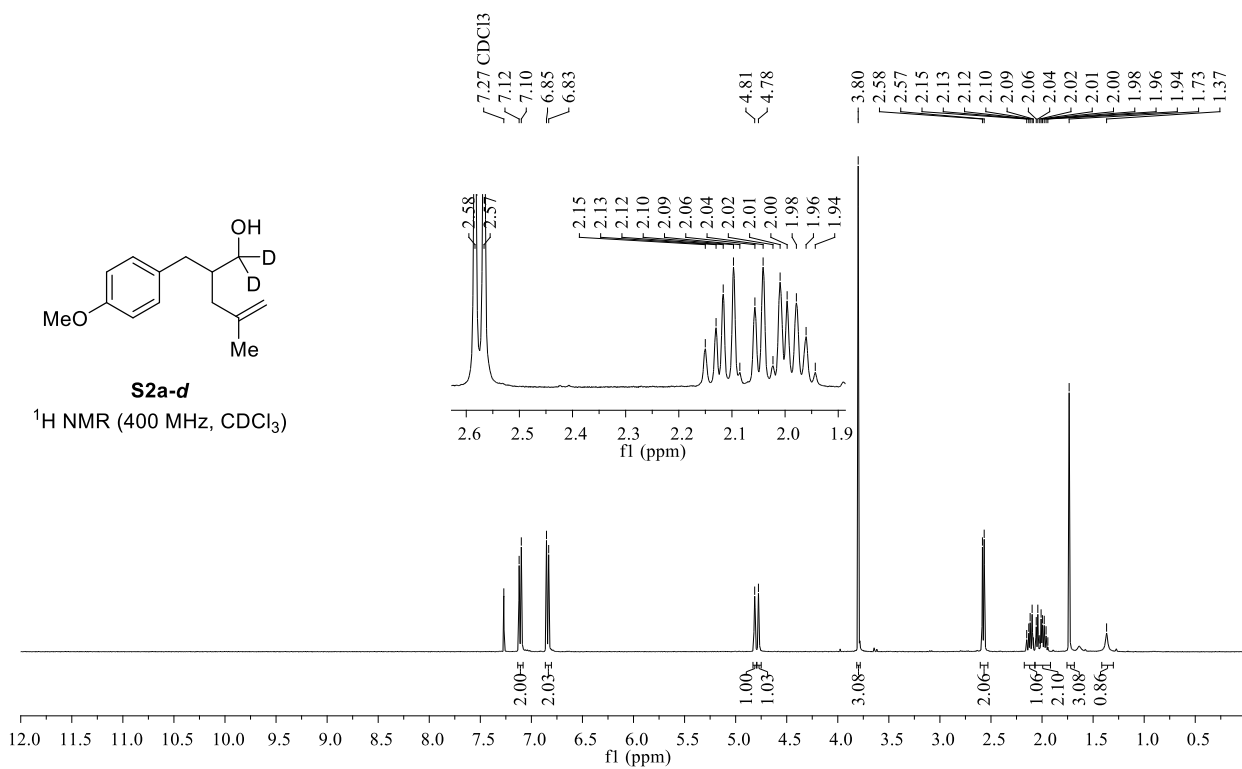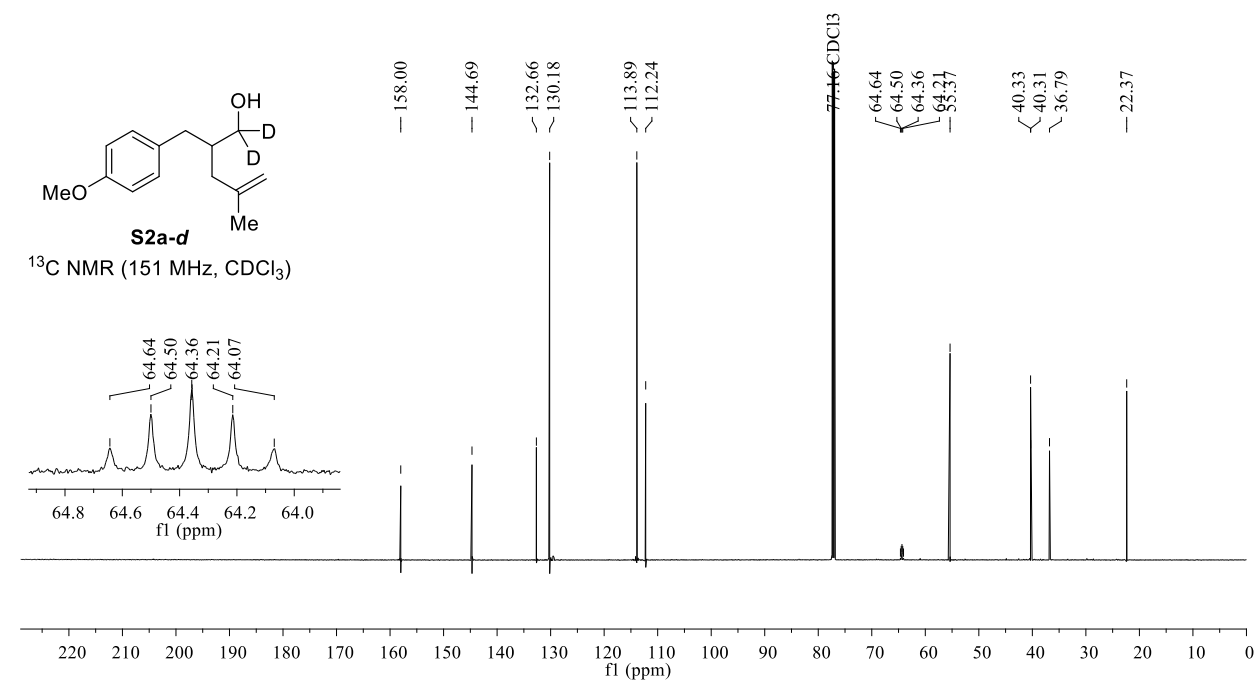

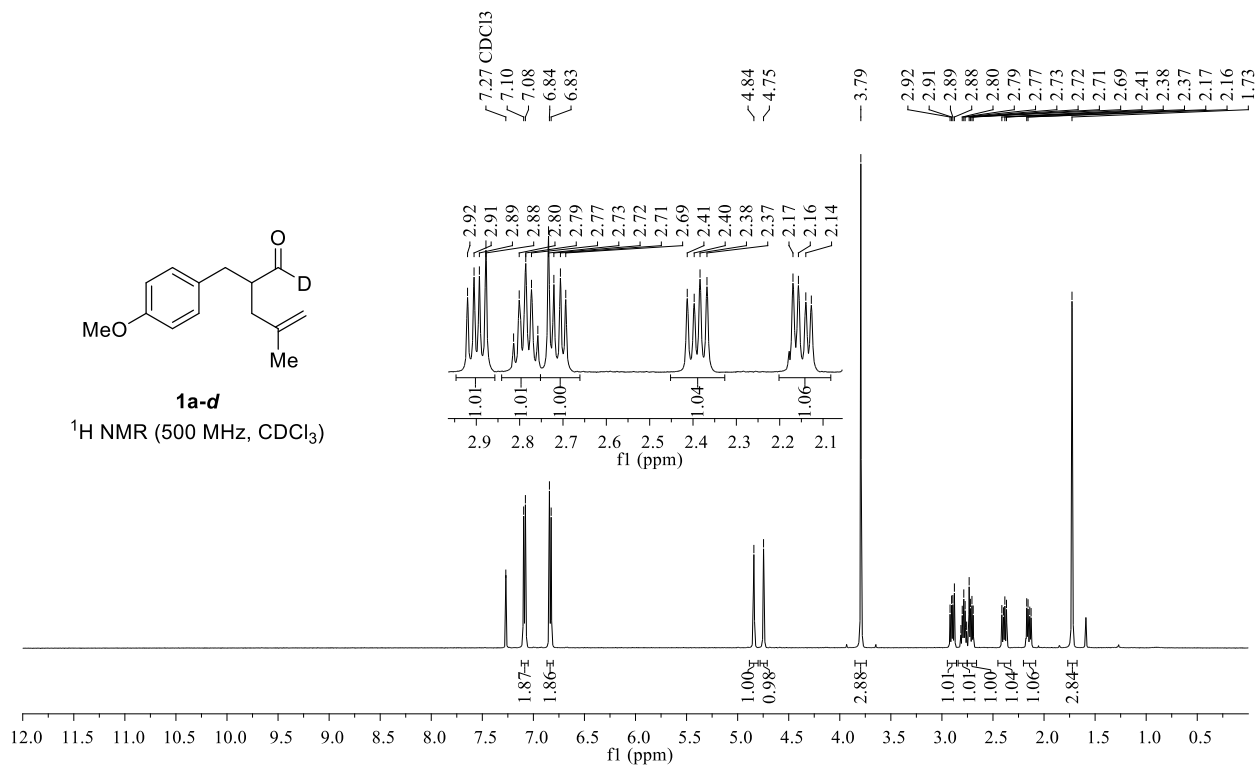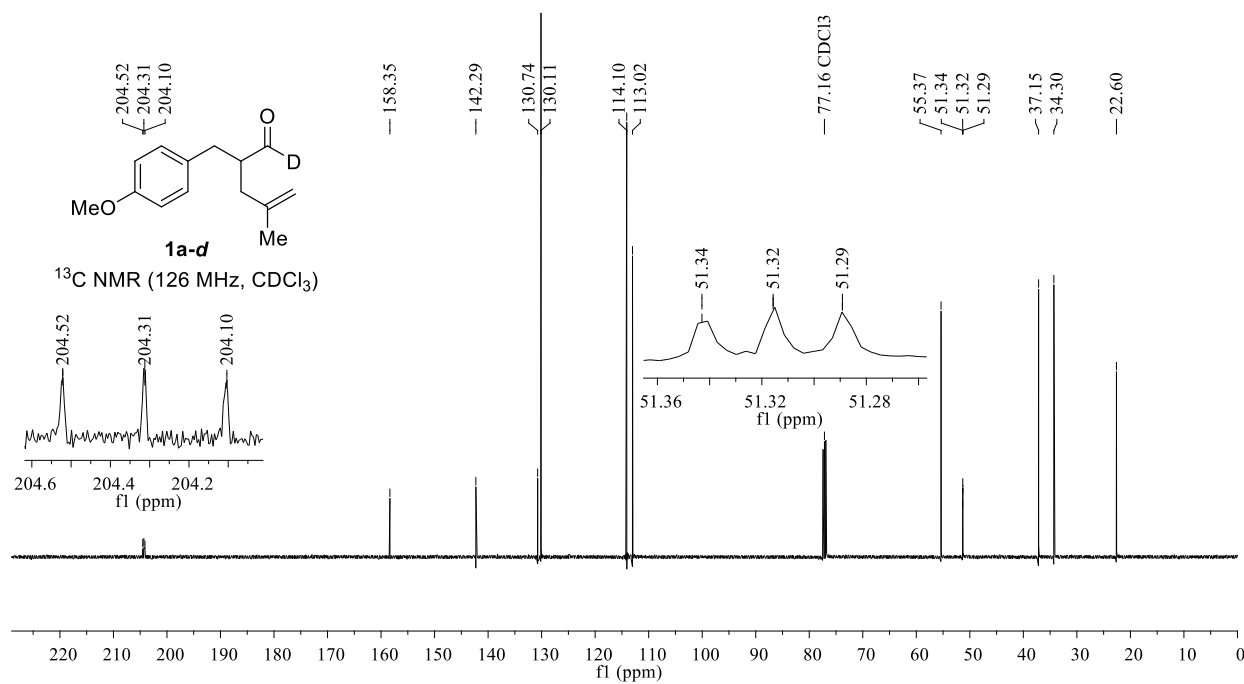

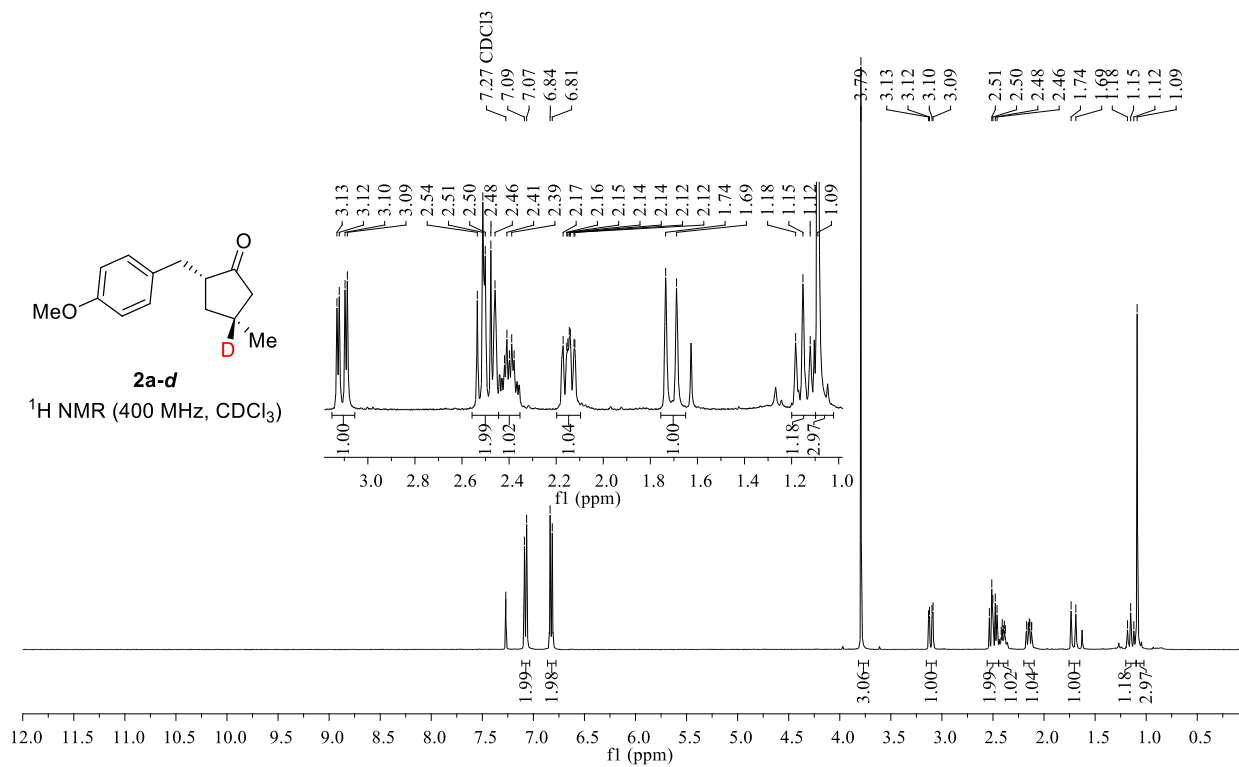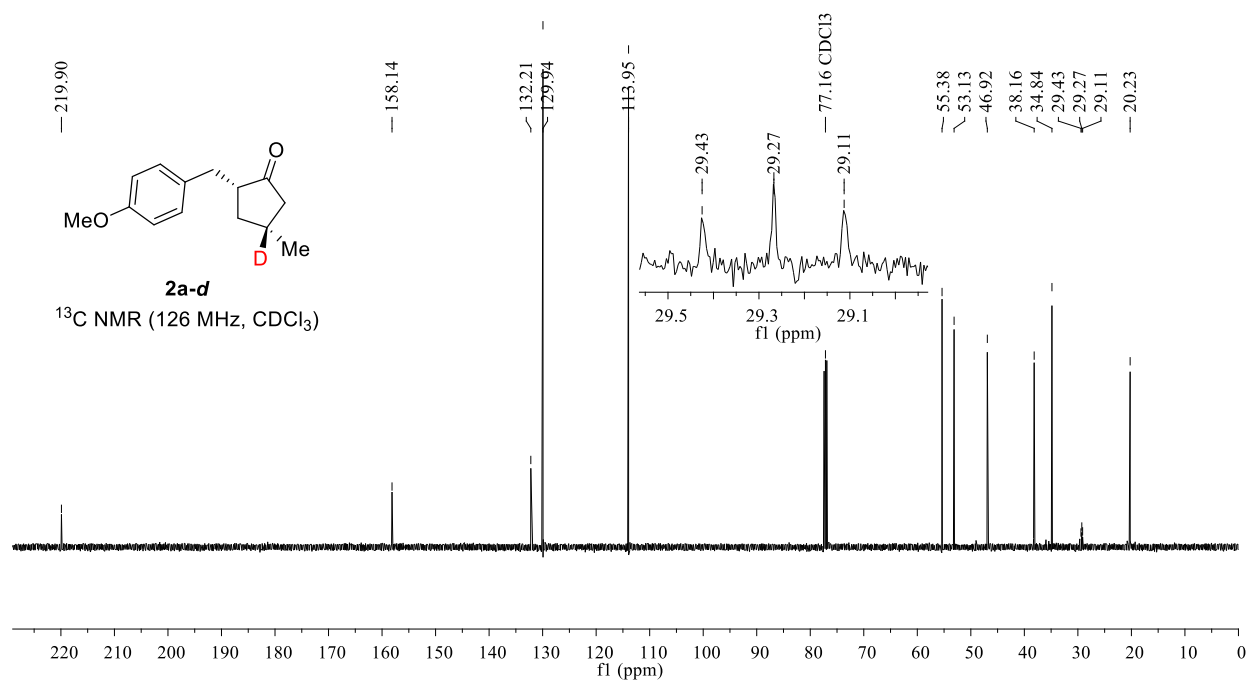

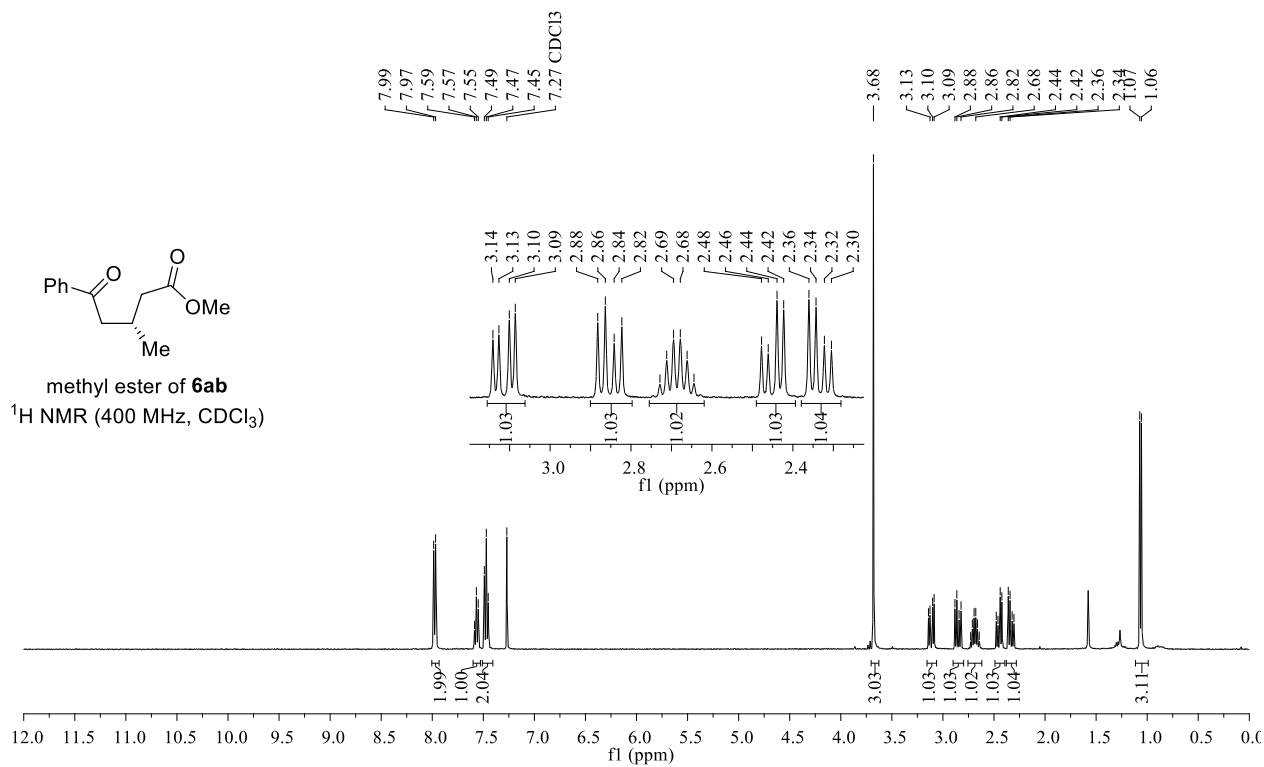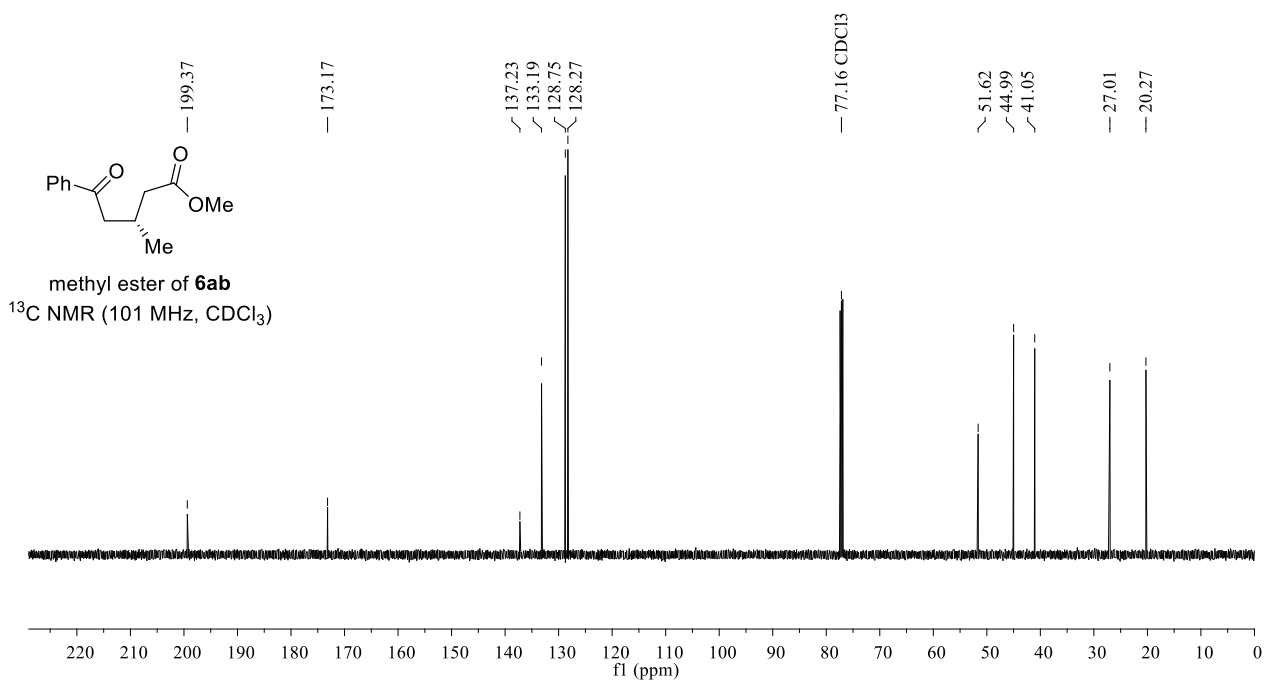

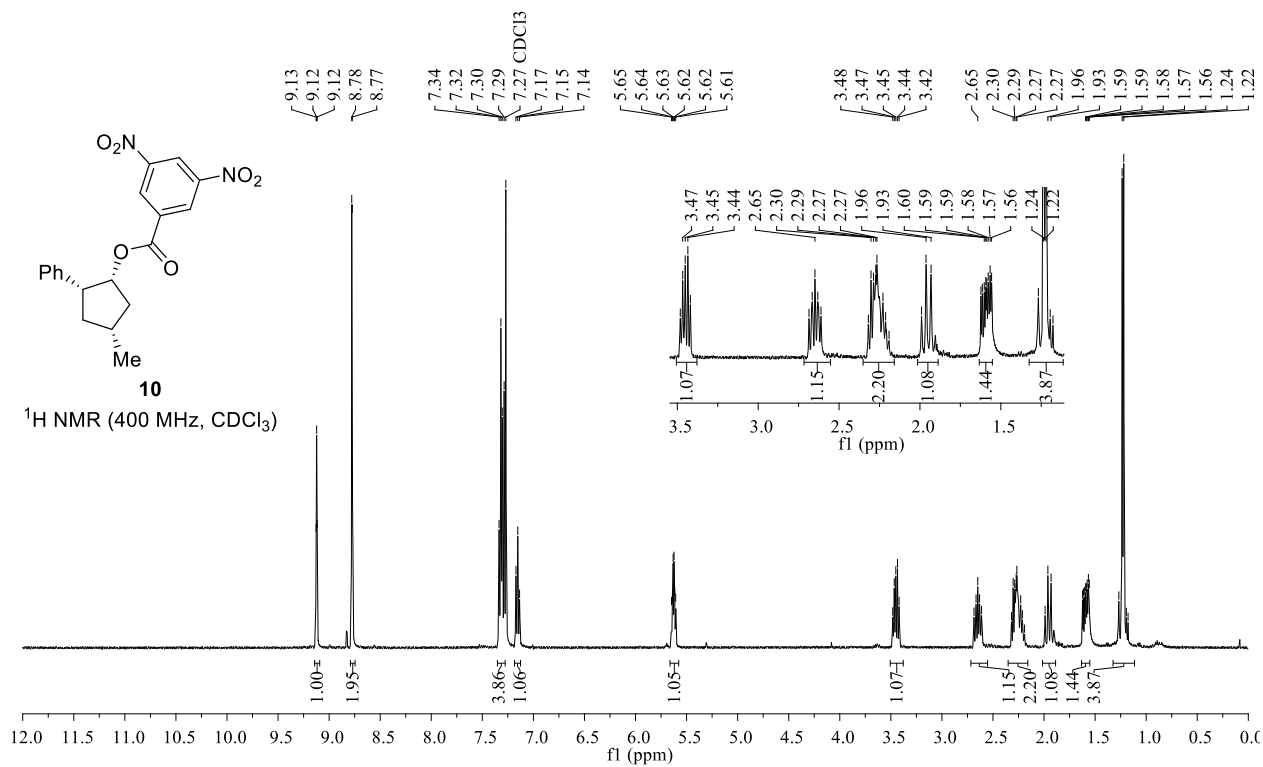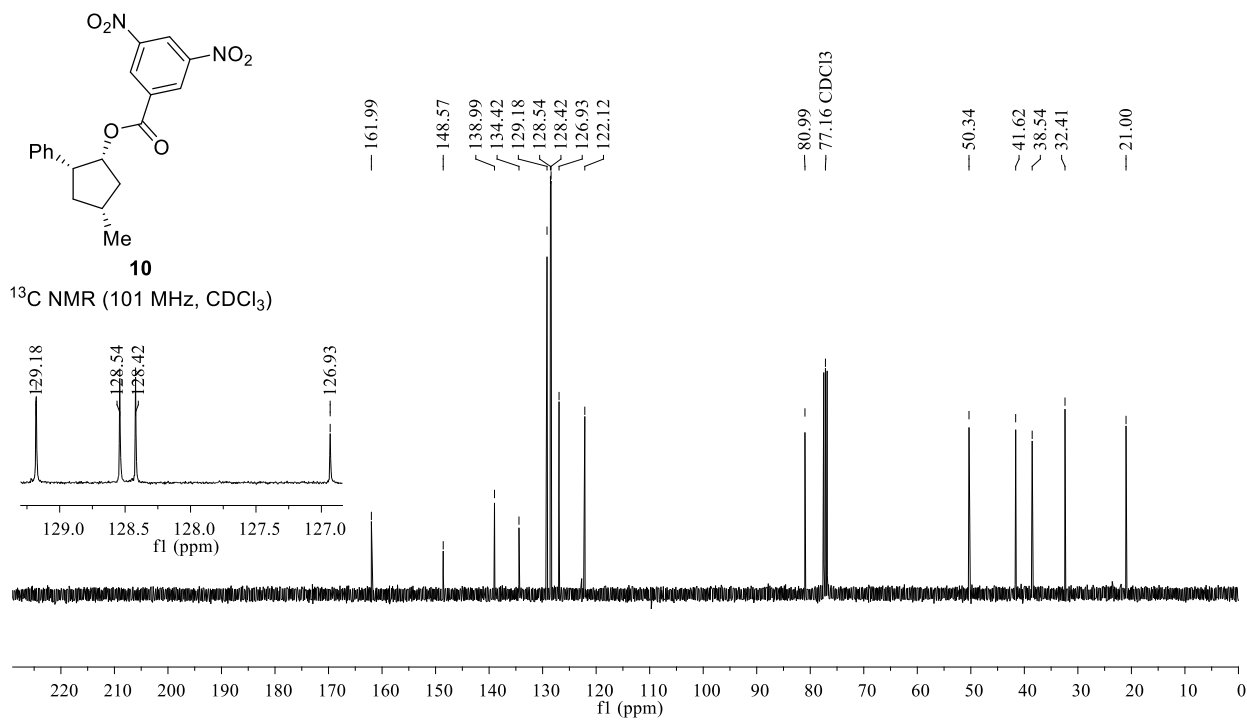



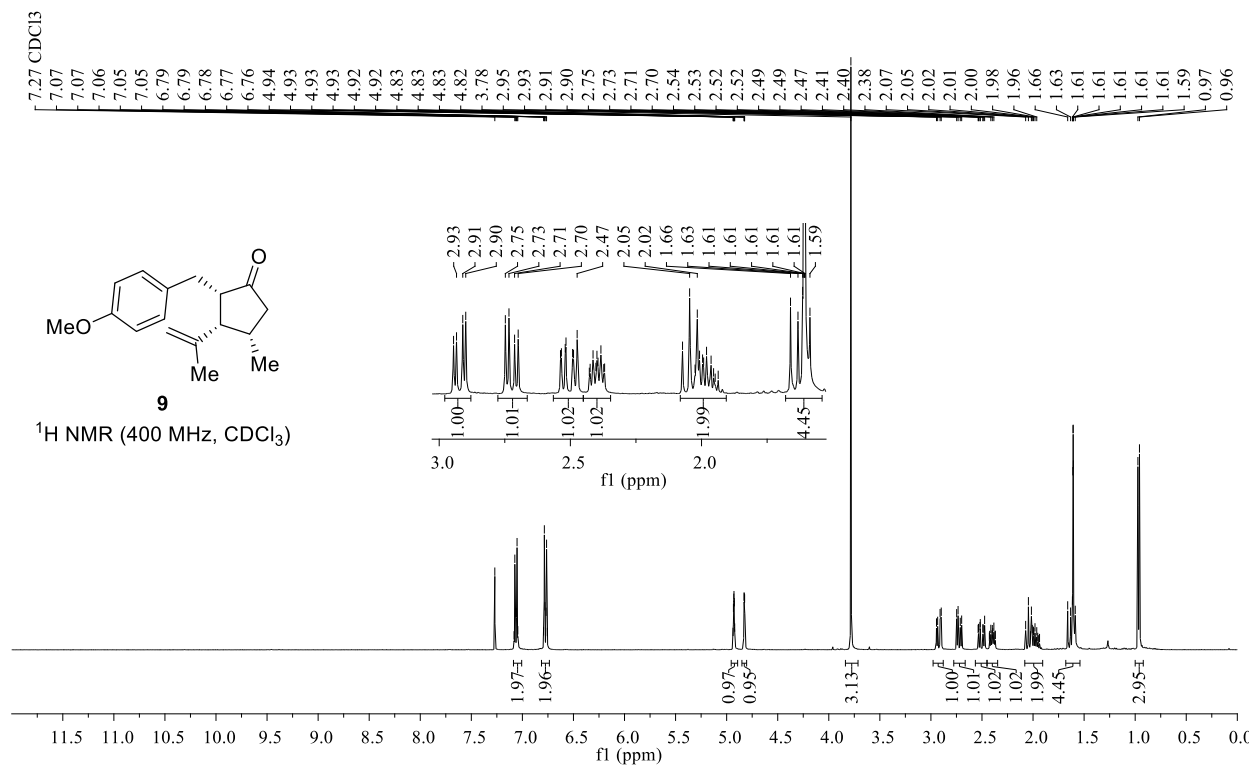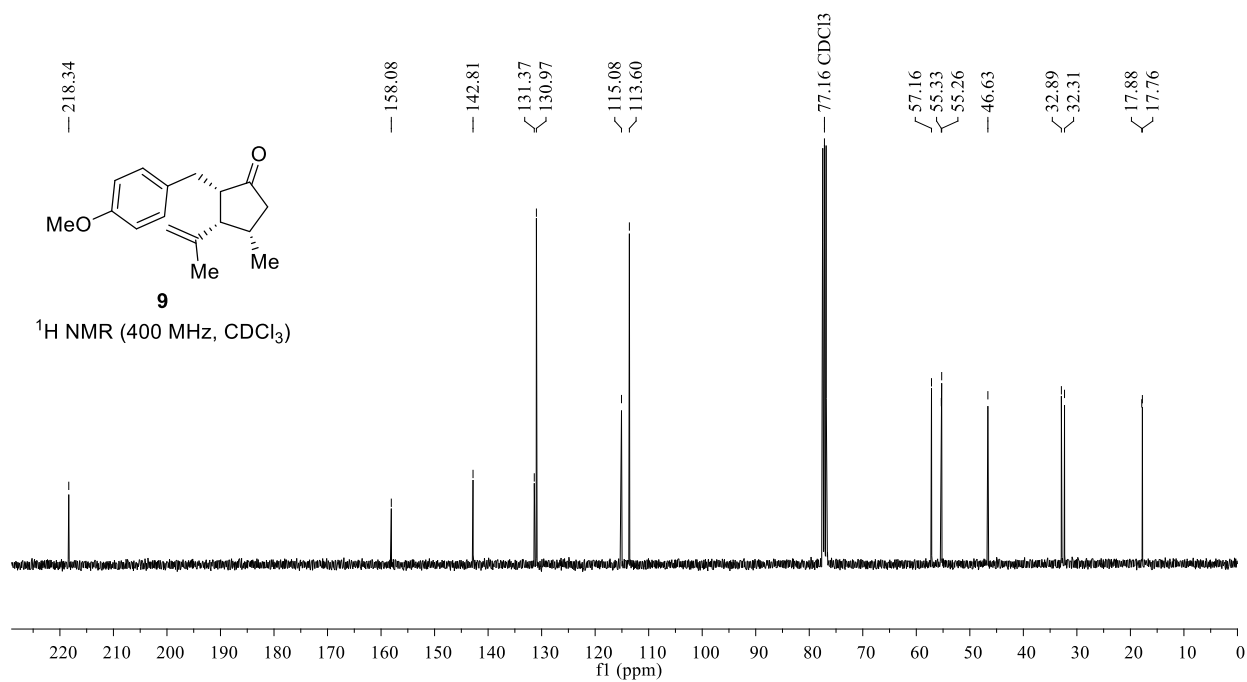

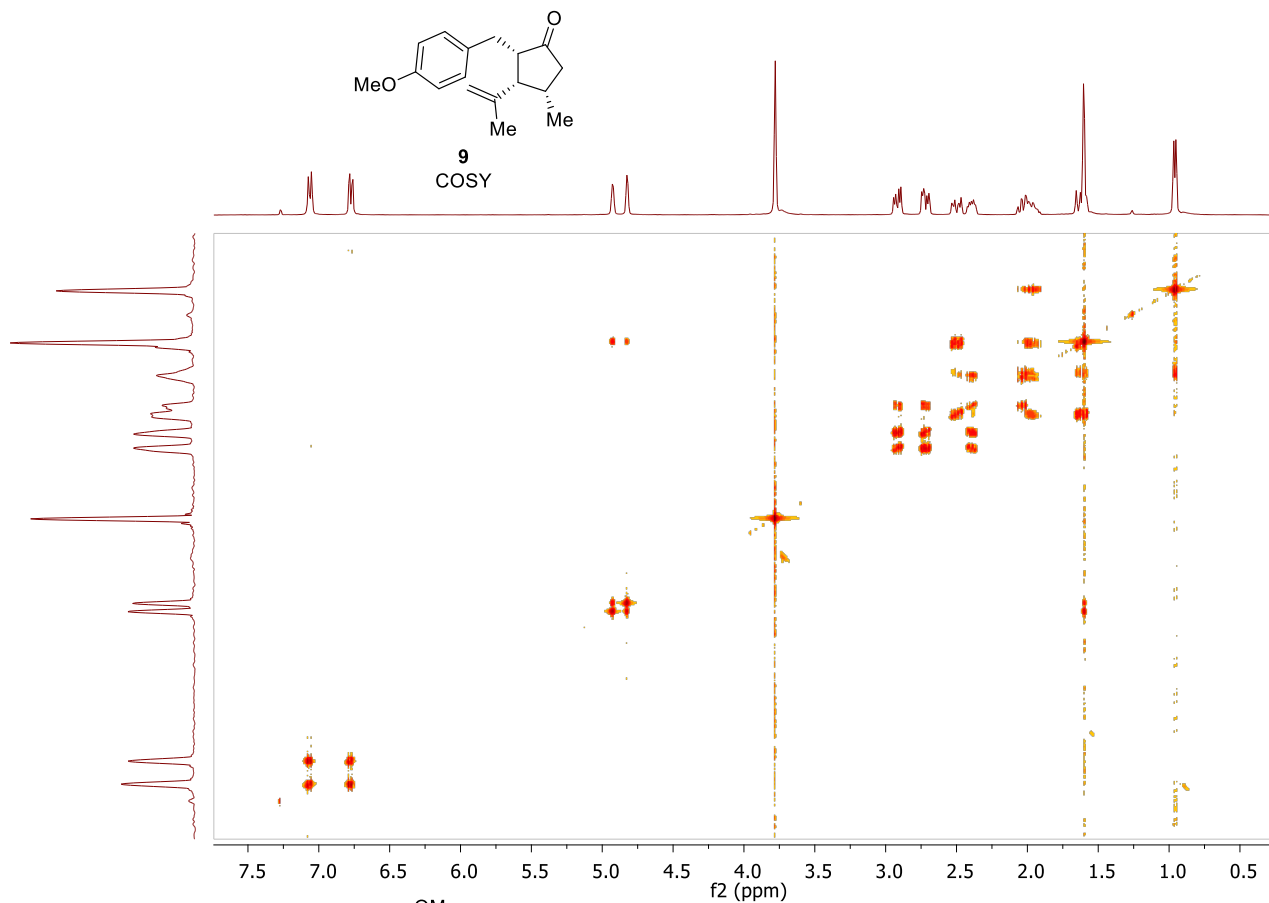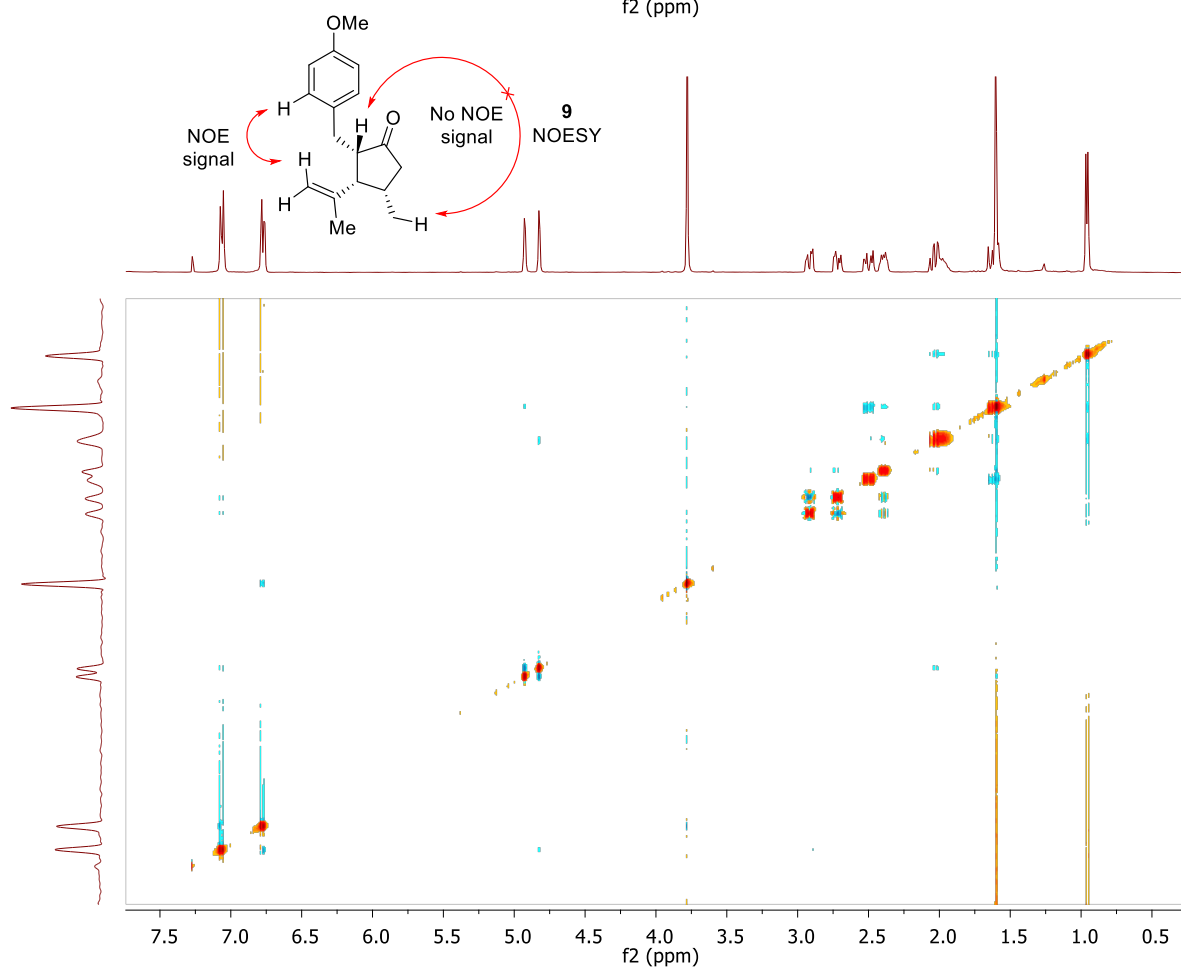

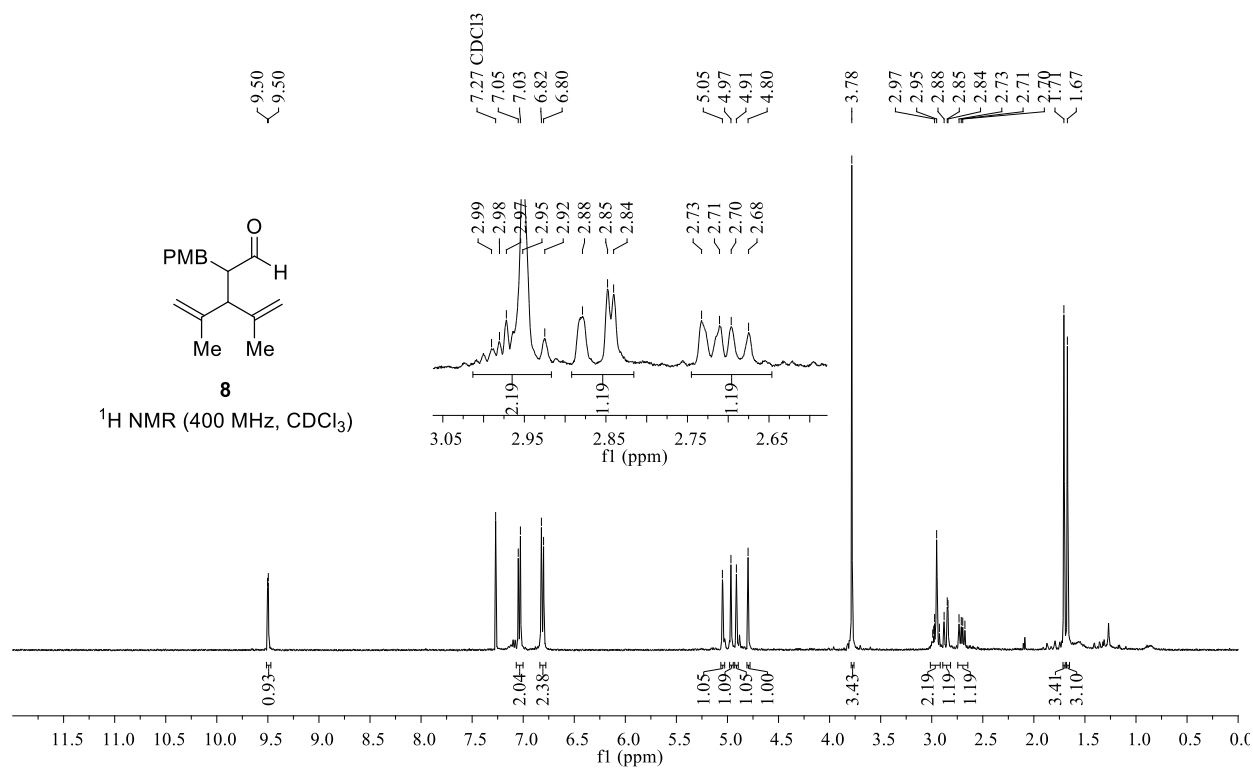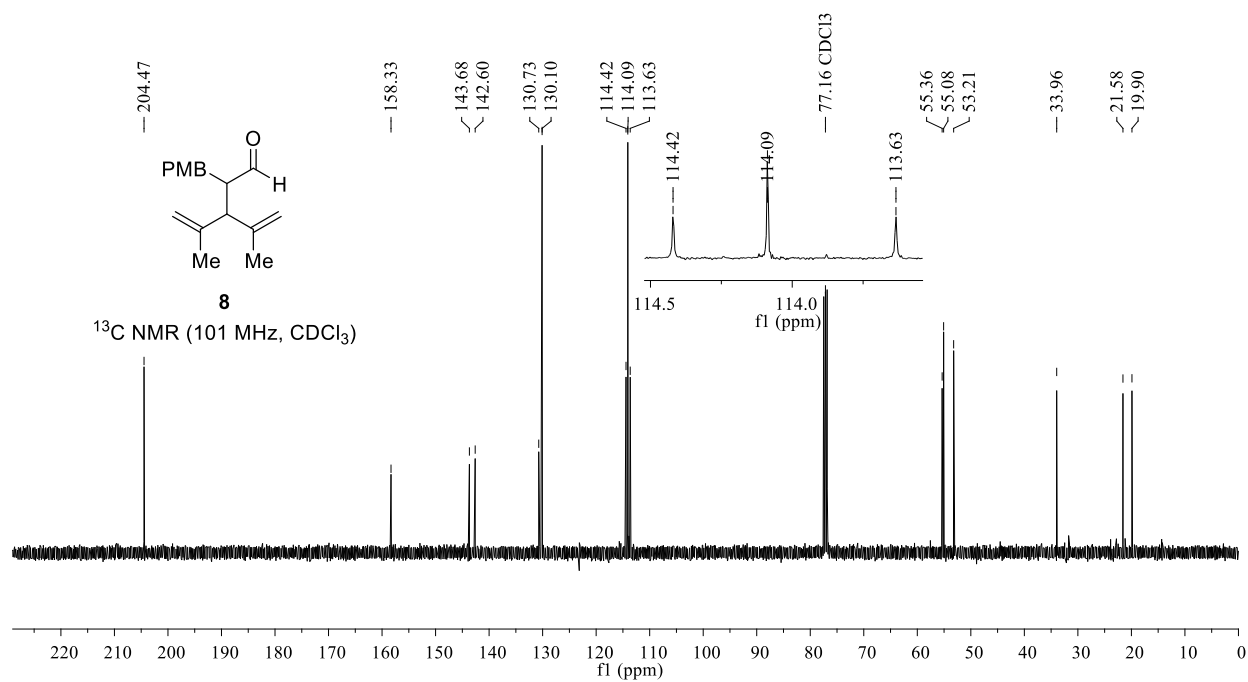

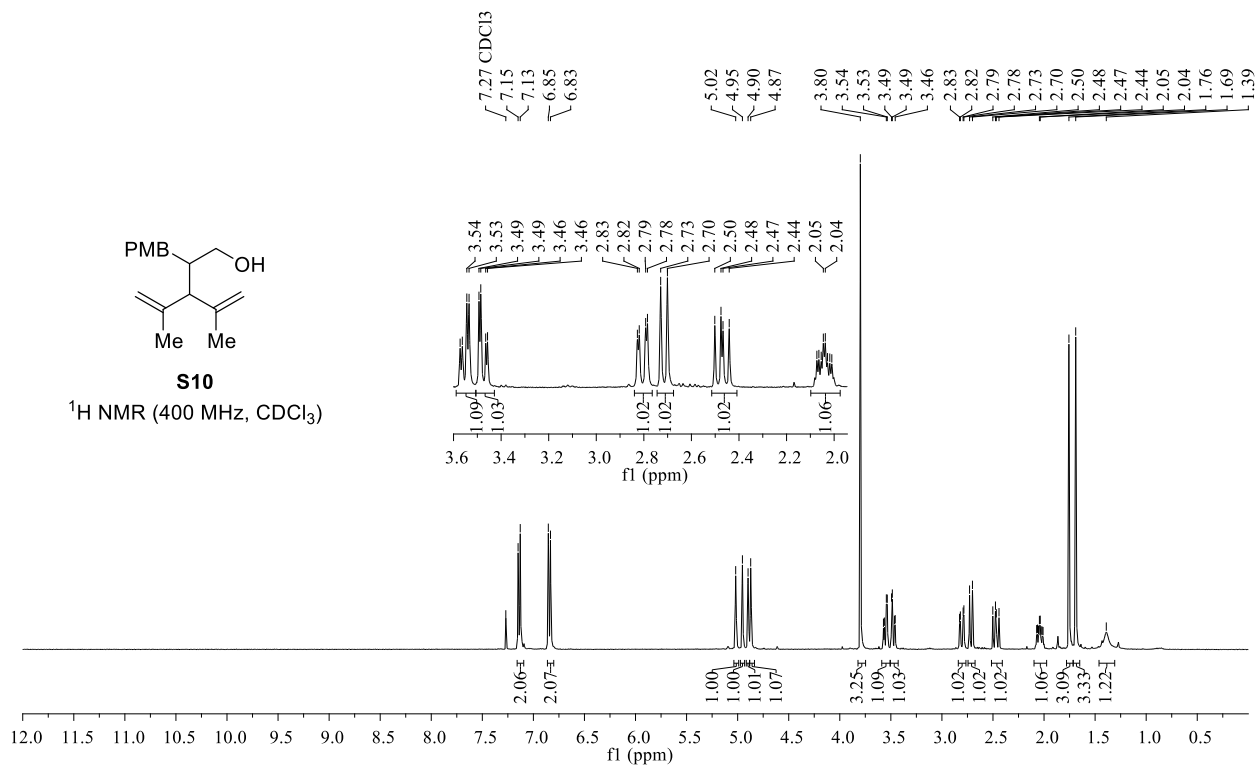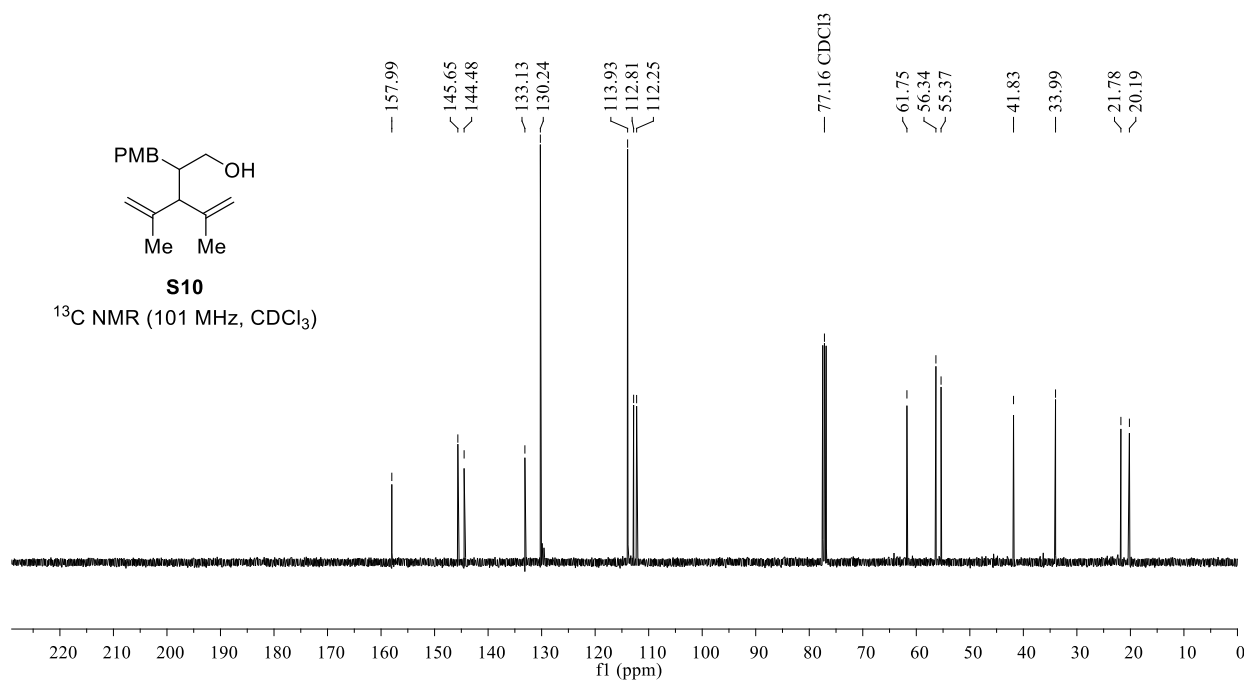

## 14. SFC Spectra

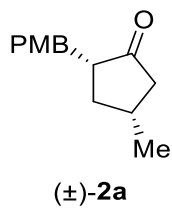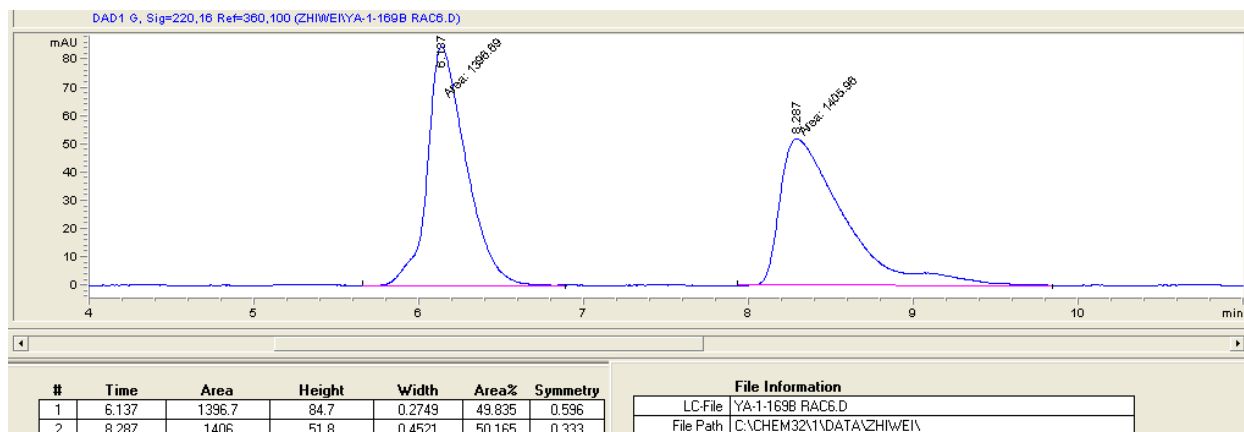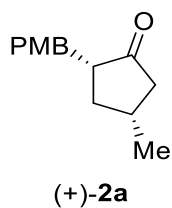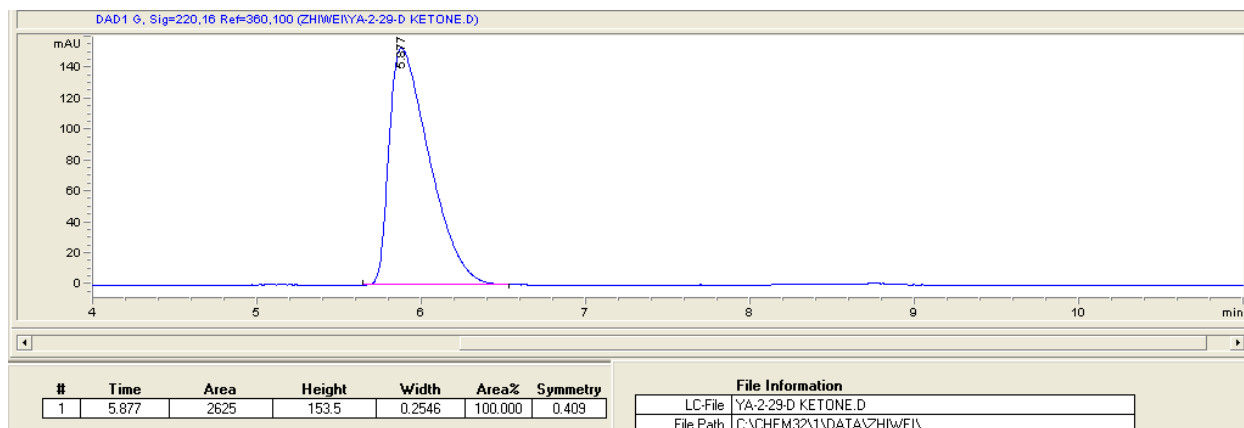

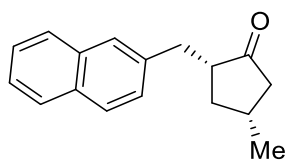

(±)-2b

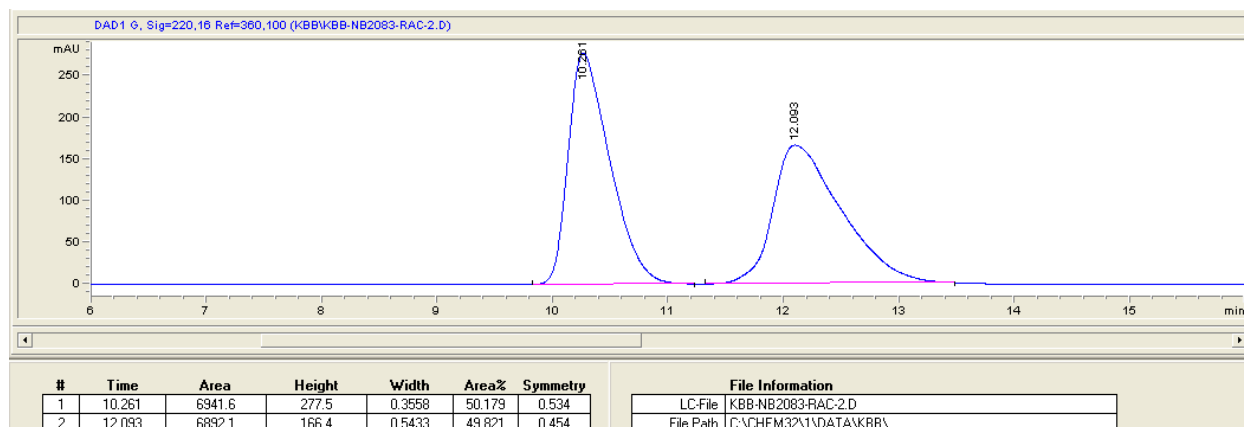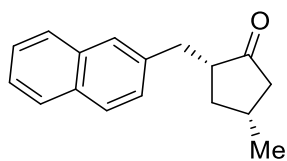

(+) -2b

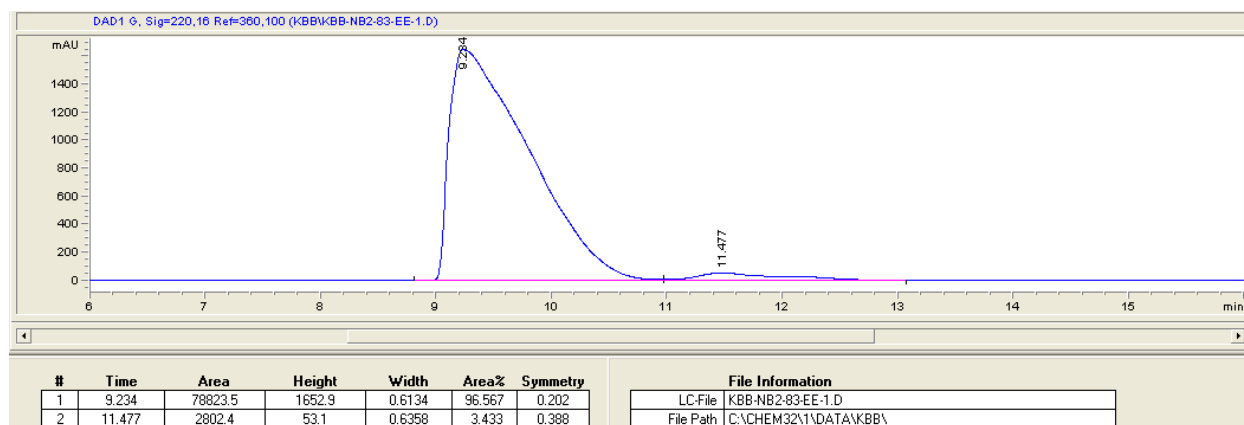

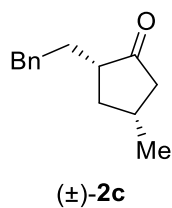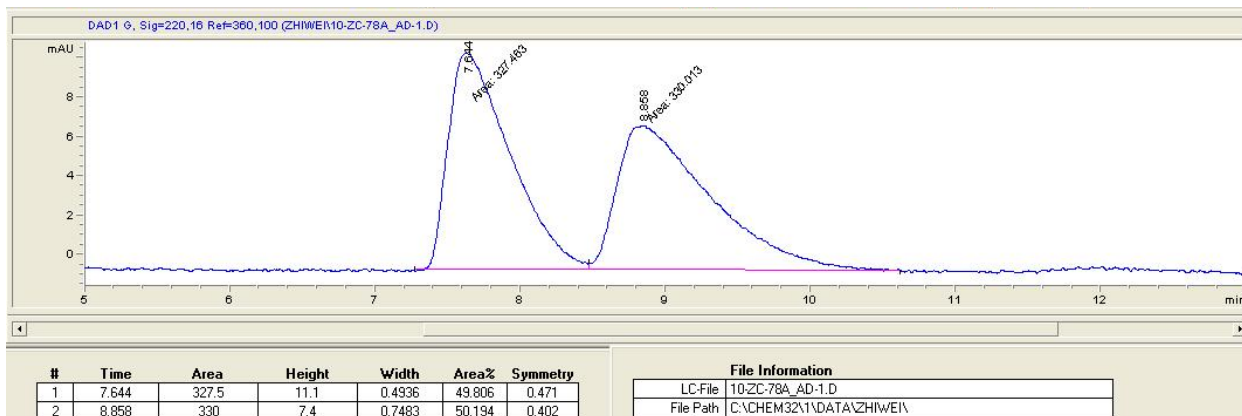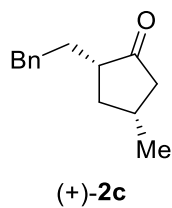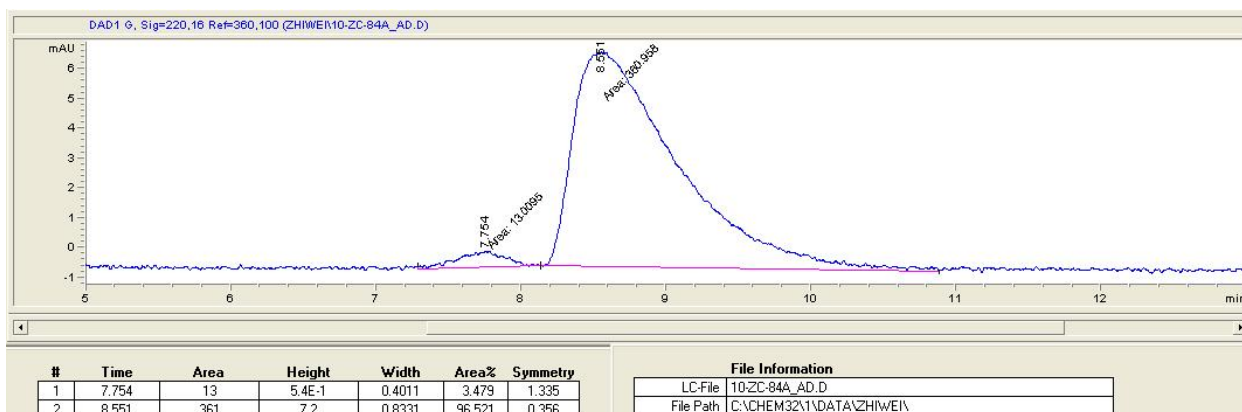

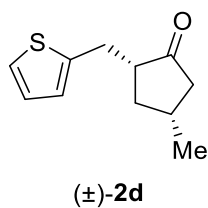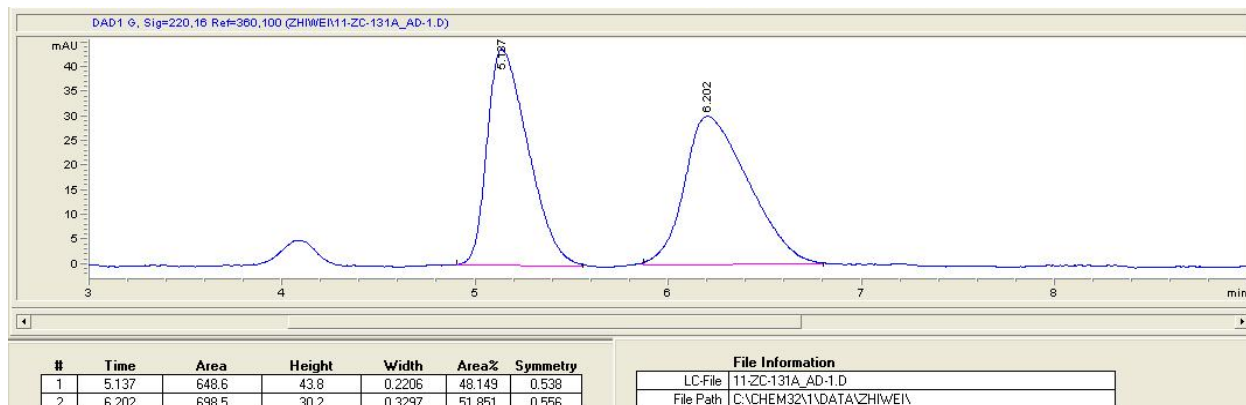

\* the peak at 4.1 min correspond to the *trans* diastereomer that was not separated from the product

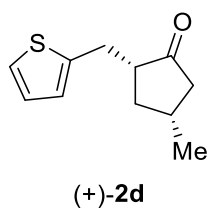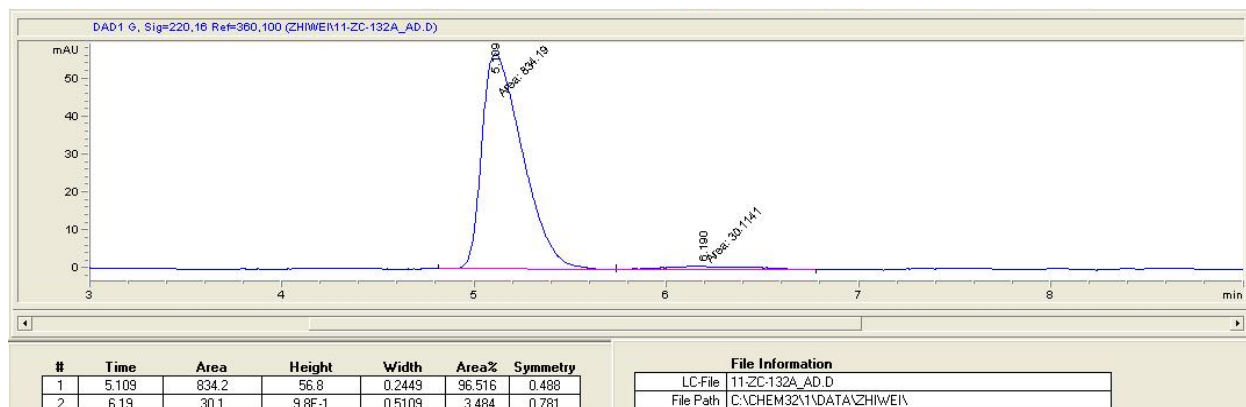



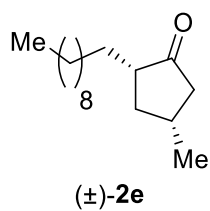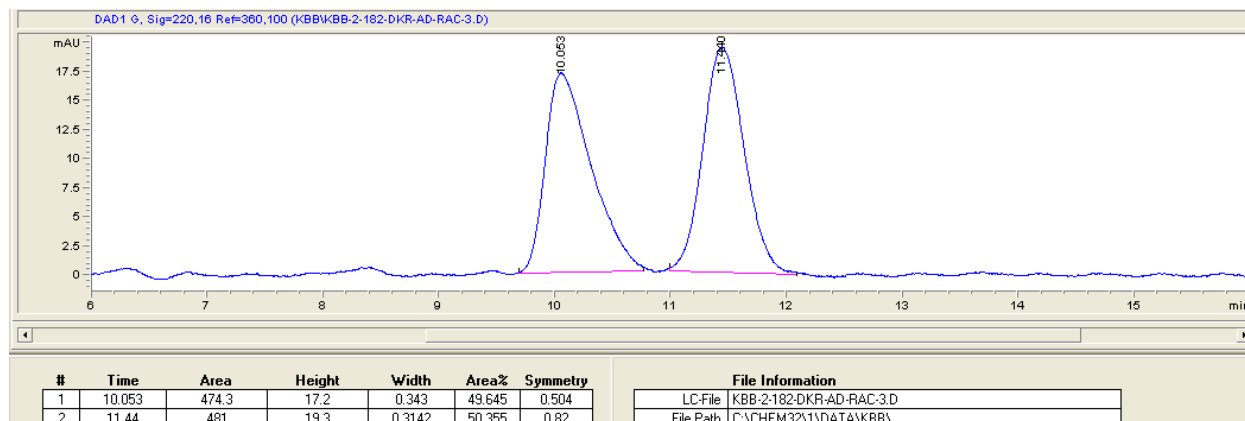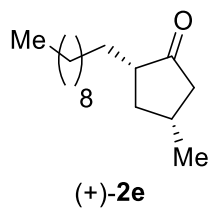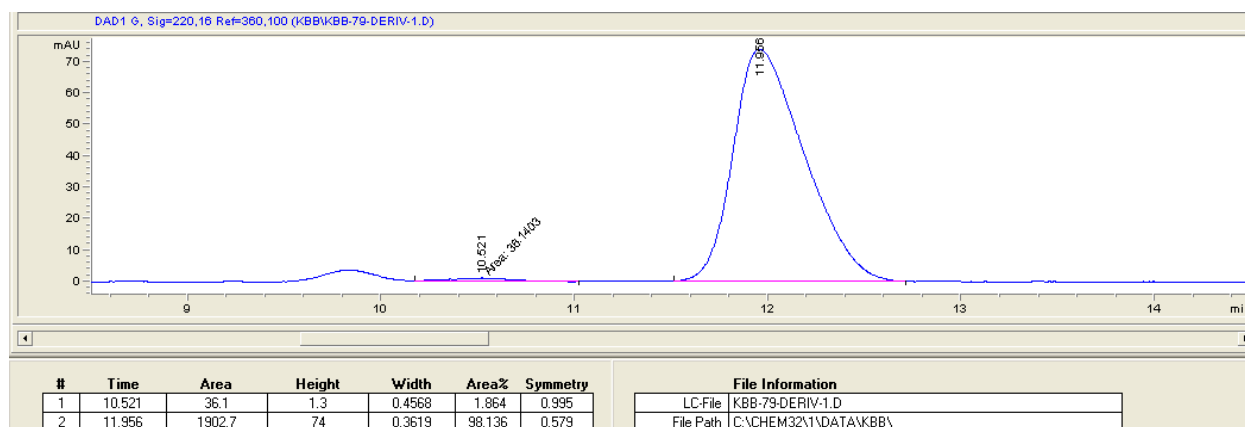

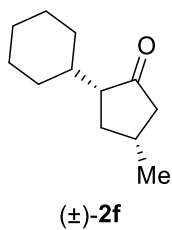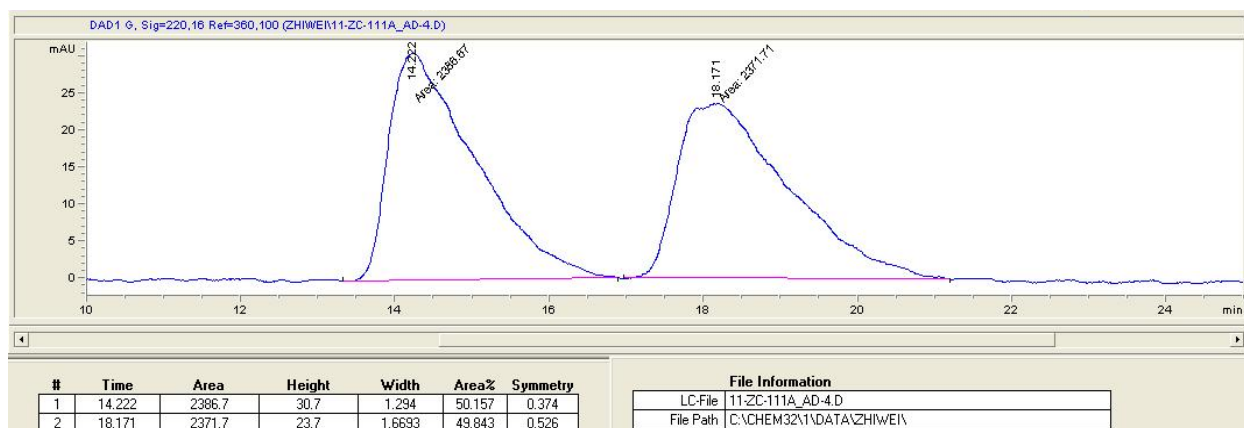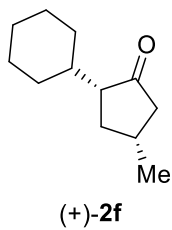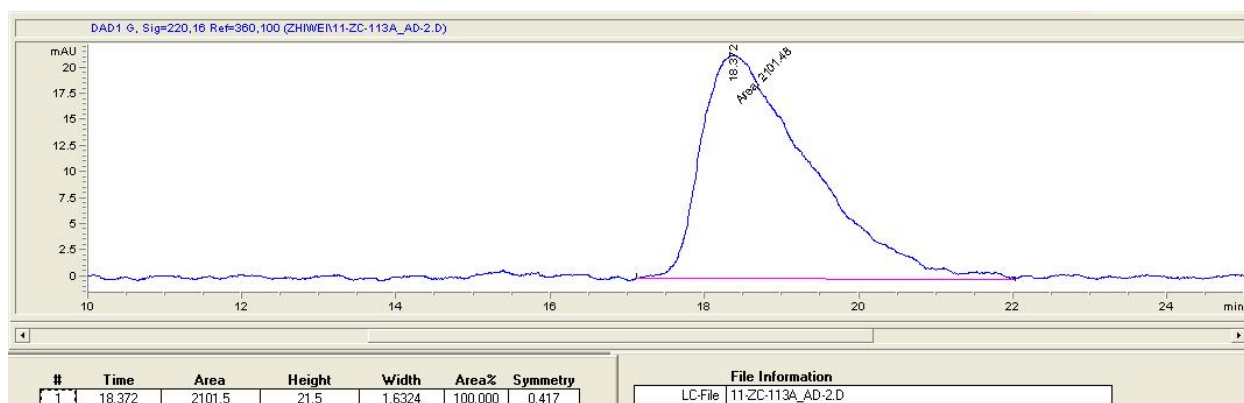

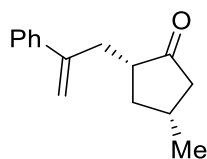

(±)-2g

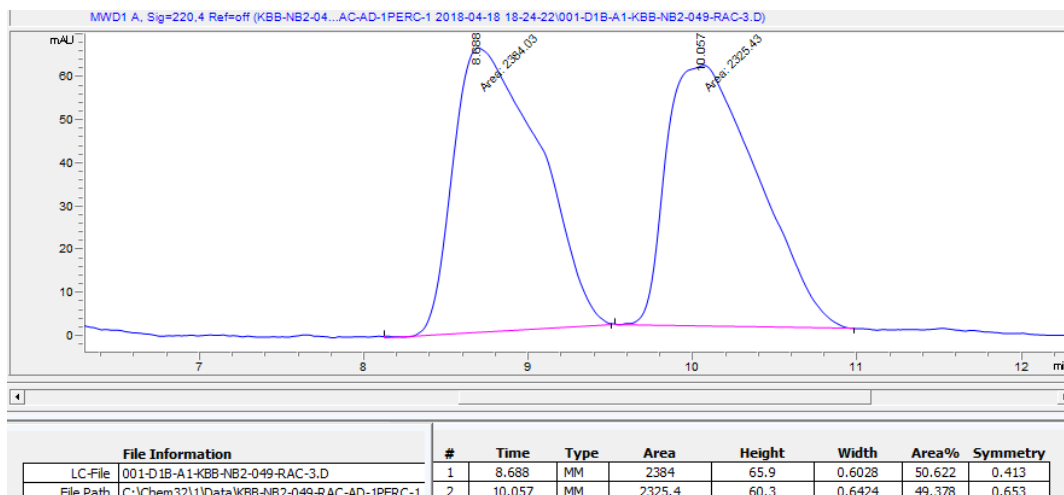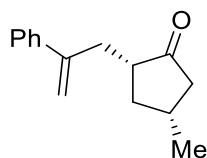

(±)-2g

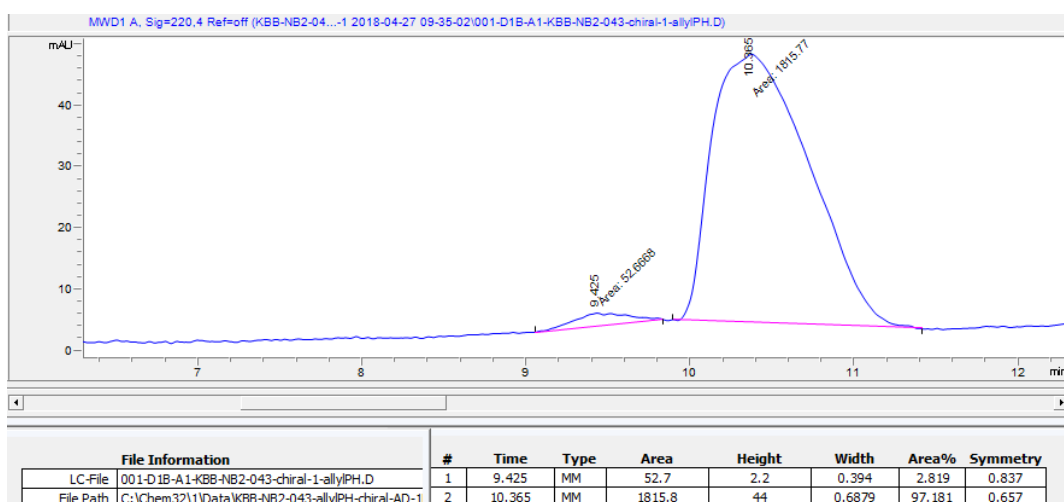

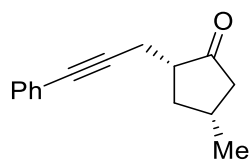

(±)-2h

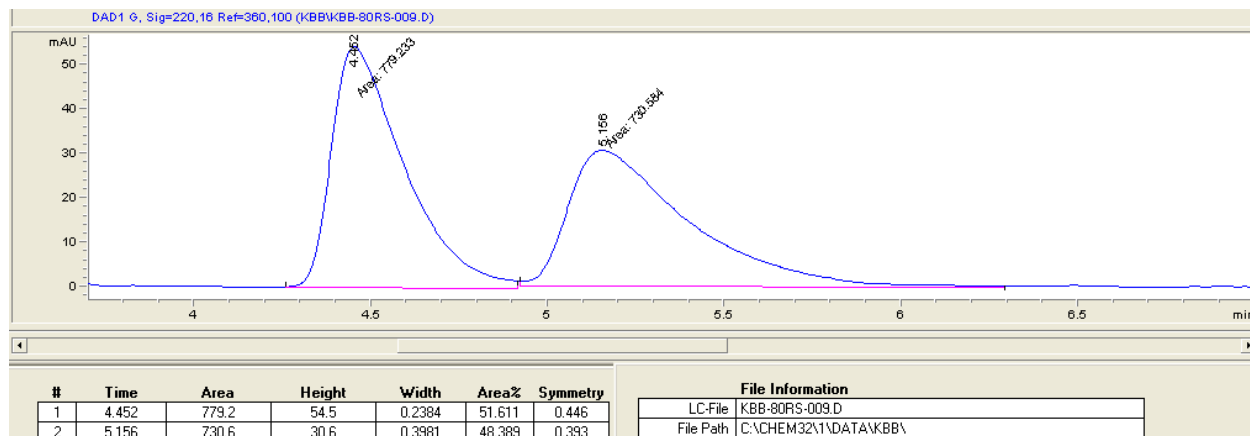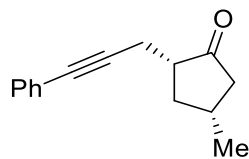

(+) -2h

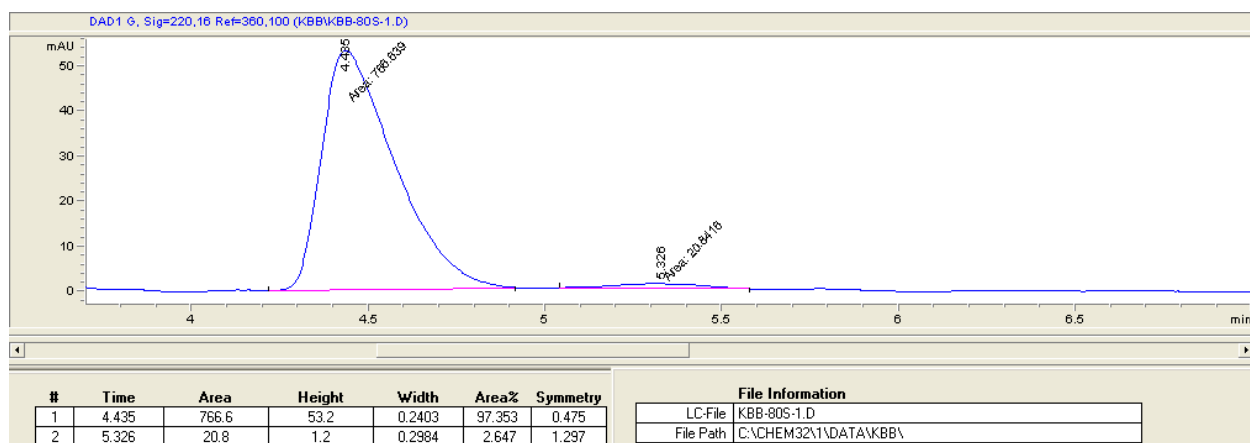

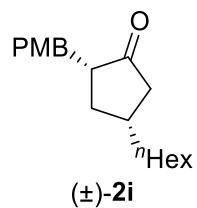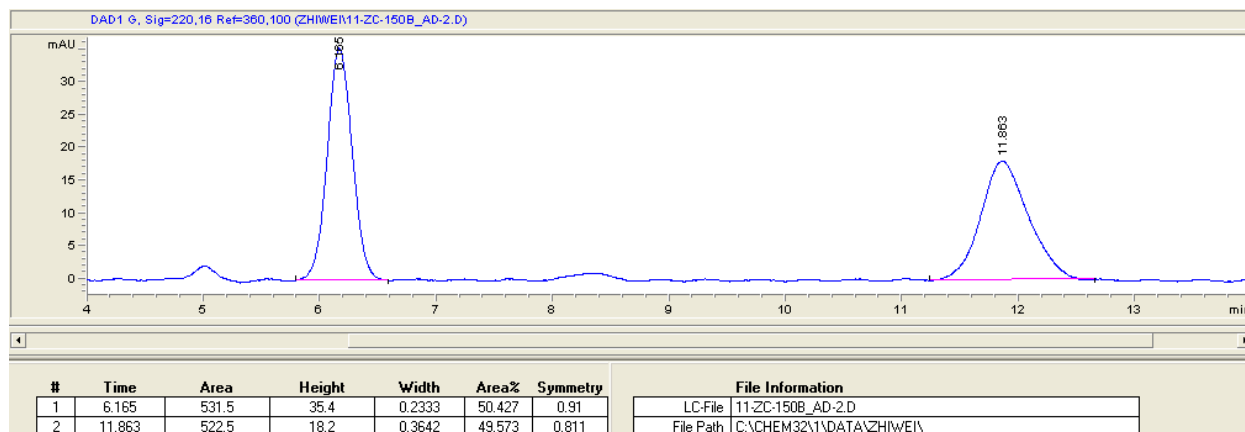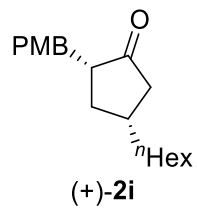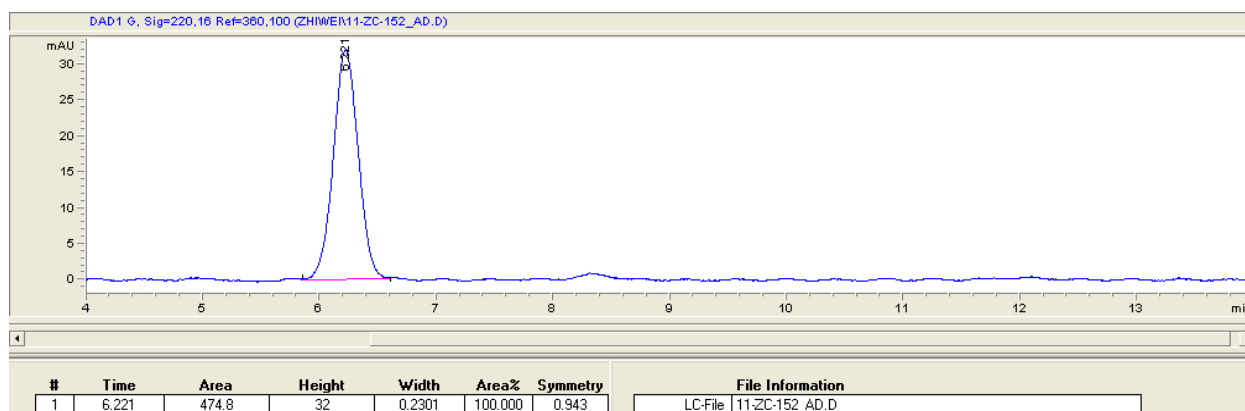

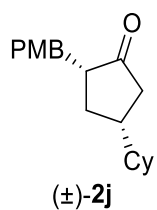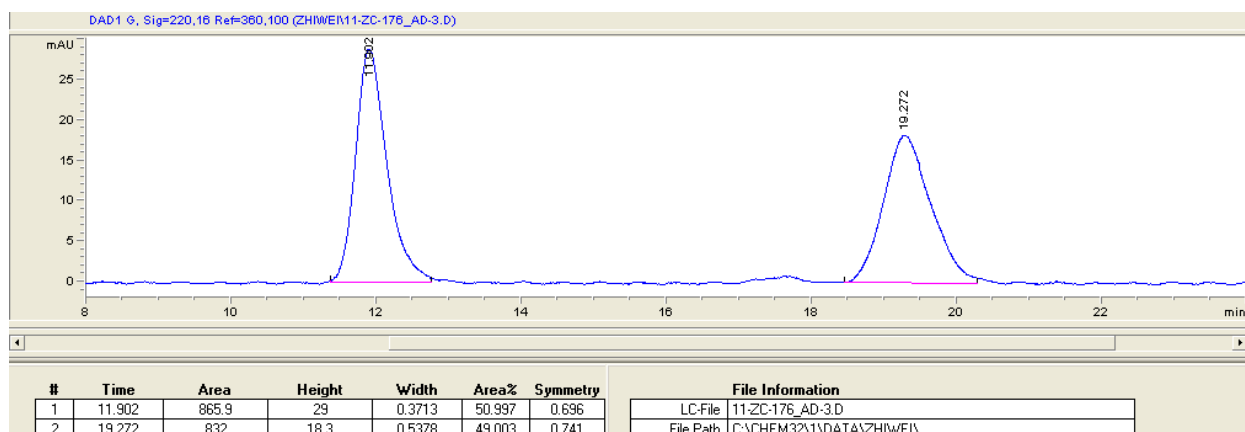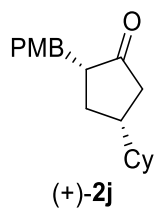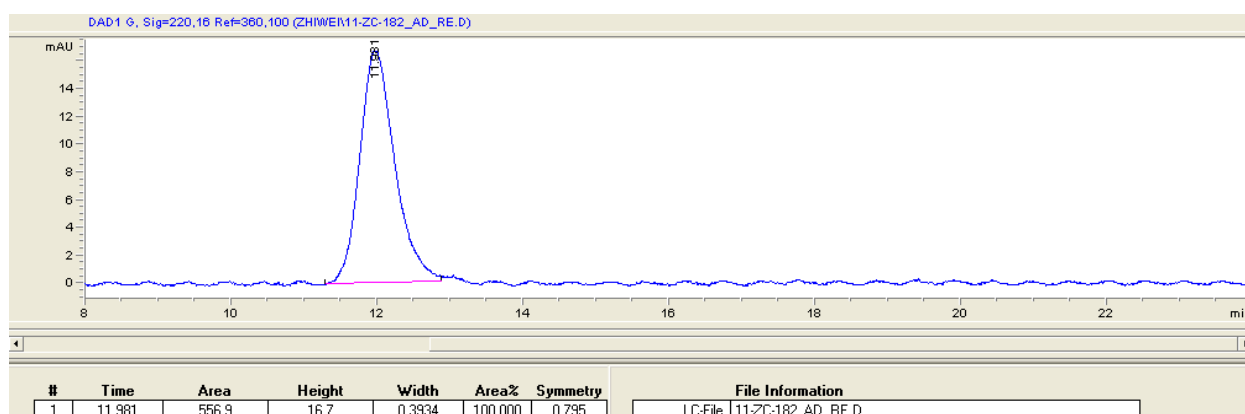

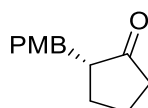

(±)-2k

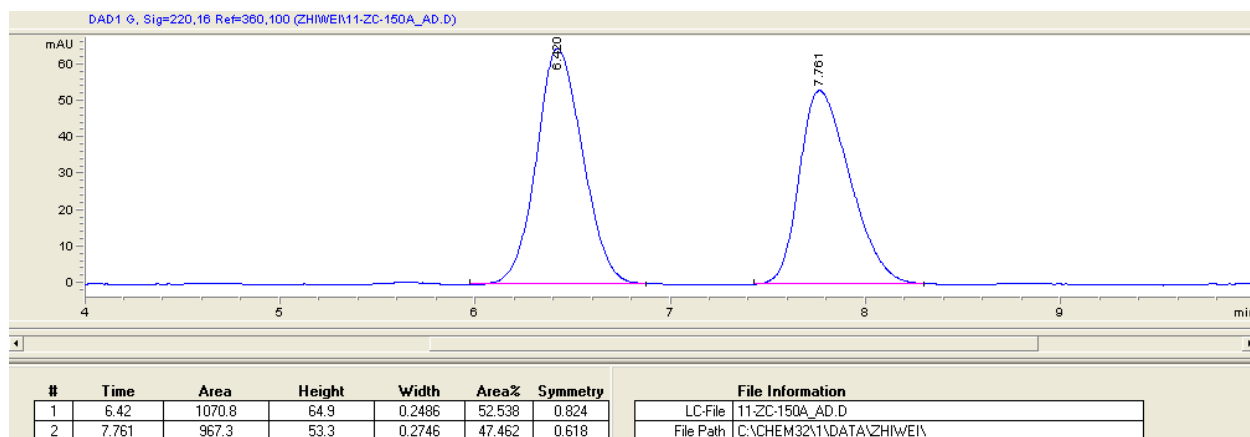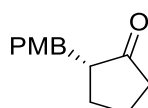

(+) -2k

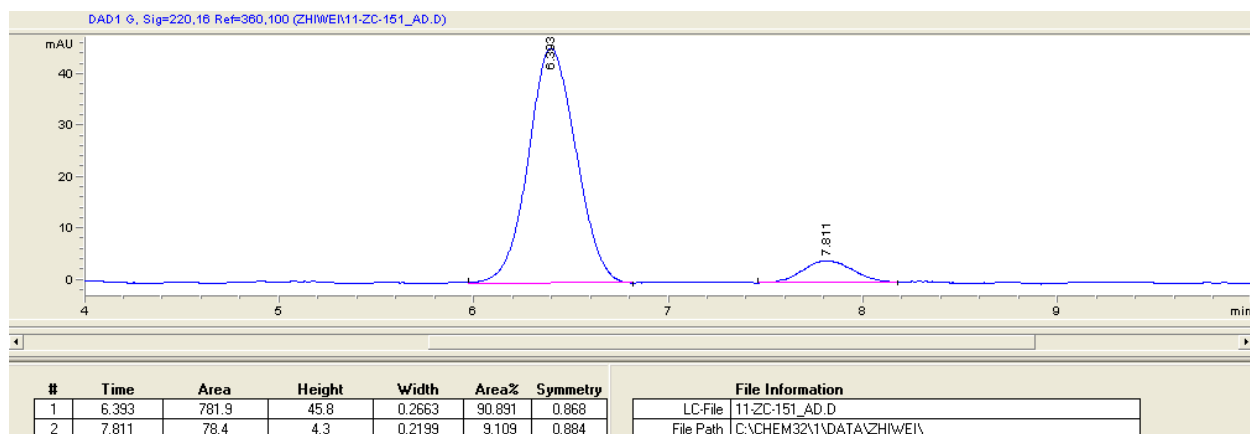

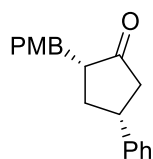

(±)-4a

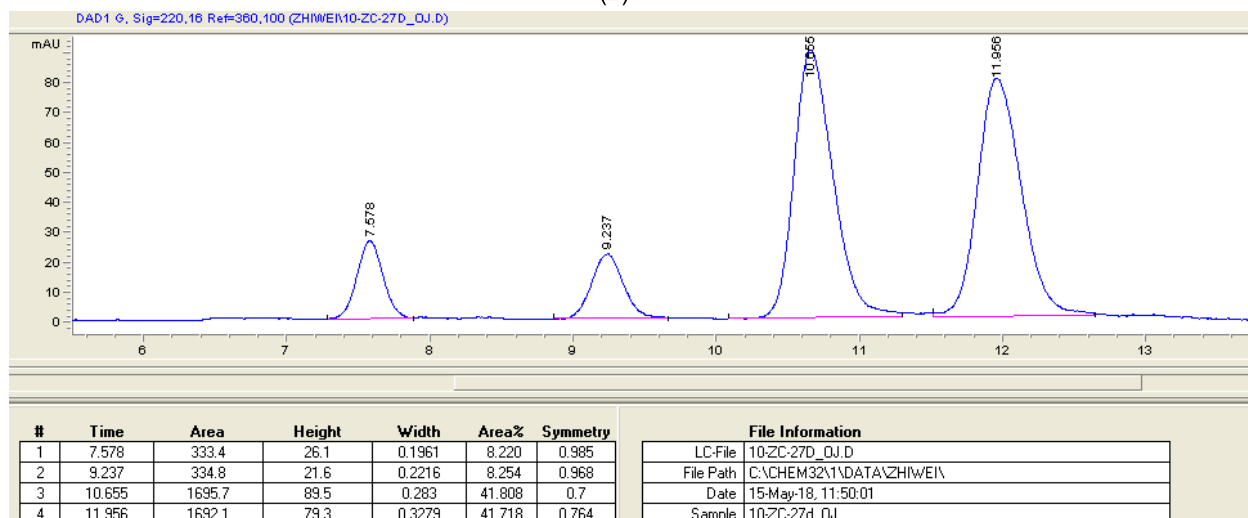

\* peaks at 7.6 and 9.2 min correspond to the *trans* diastereomer that was not separated from the product

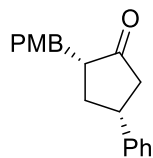

(+) -4a

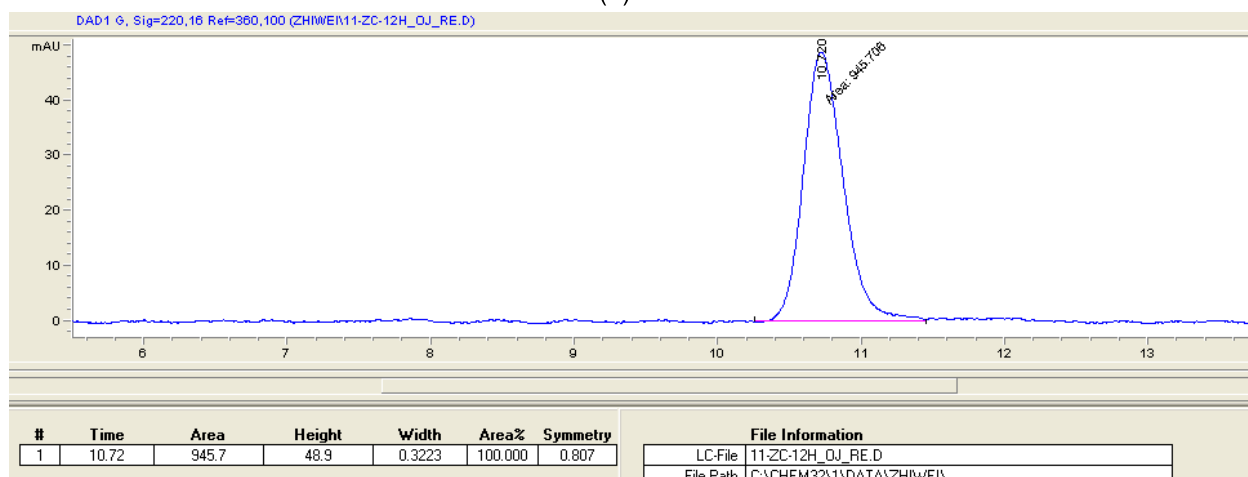



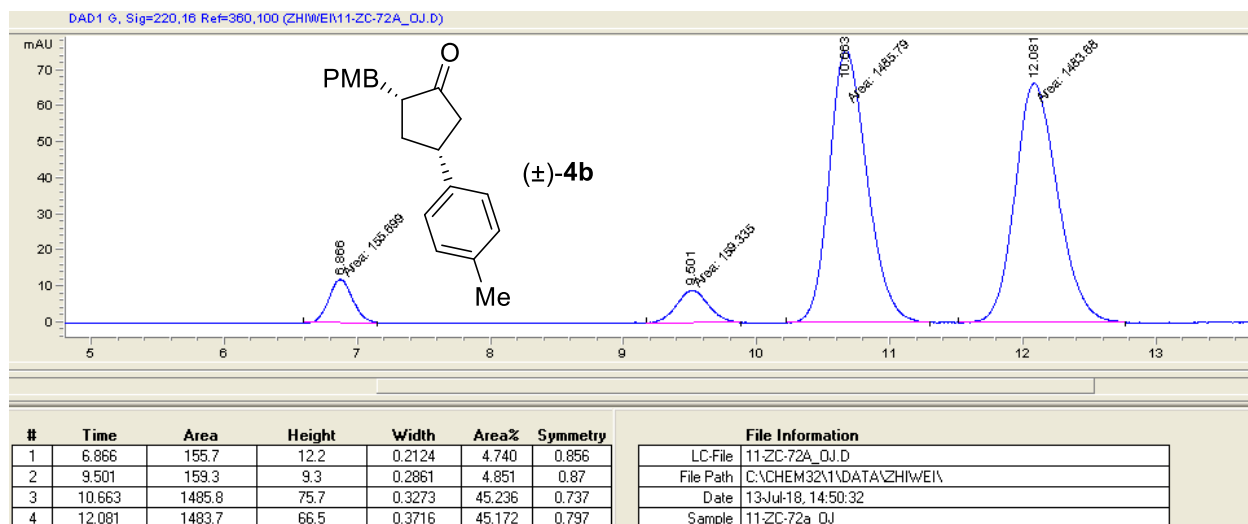

\* peaks at 6.9 and 9.5 min correspond to the *trans* diastereomer that was not separated from the product

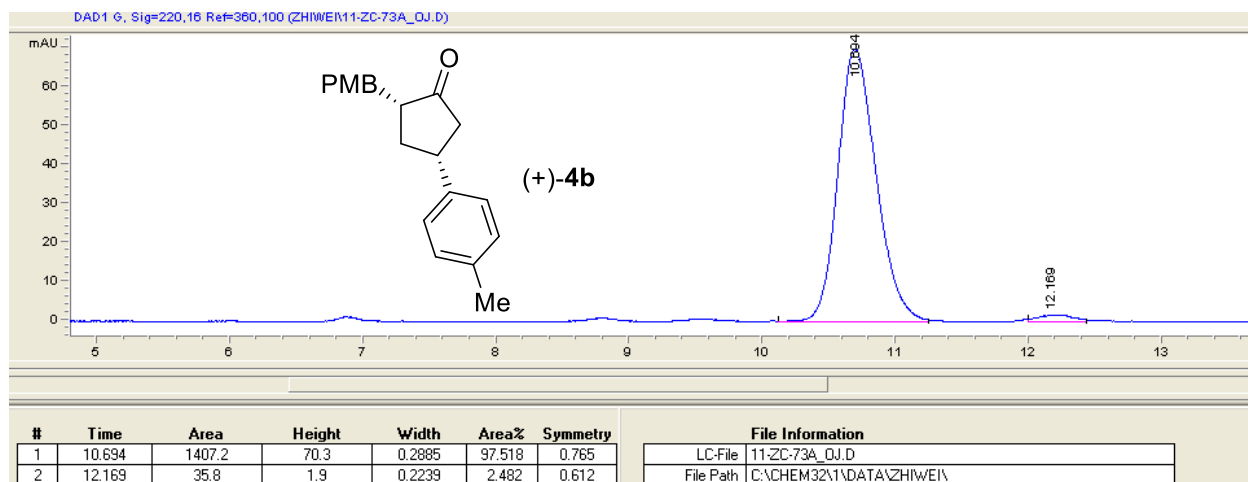

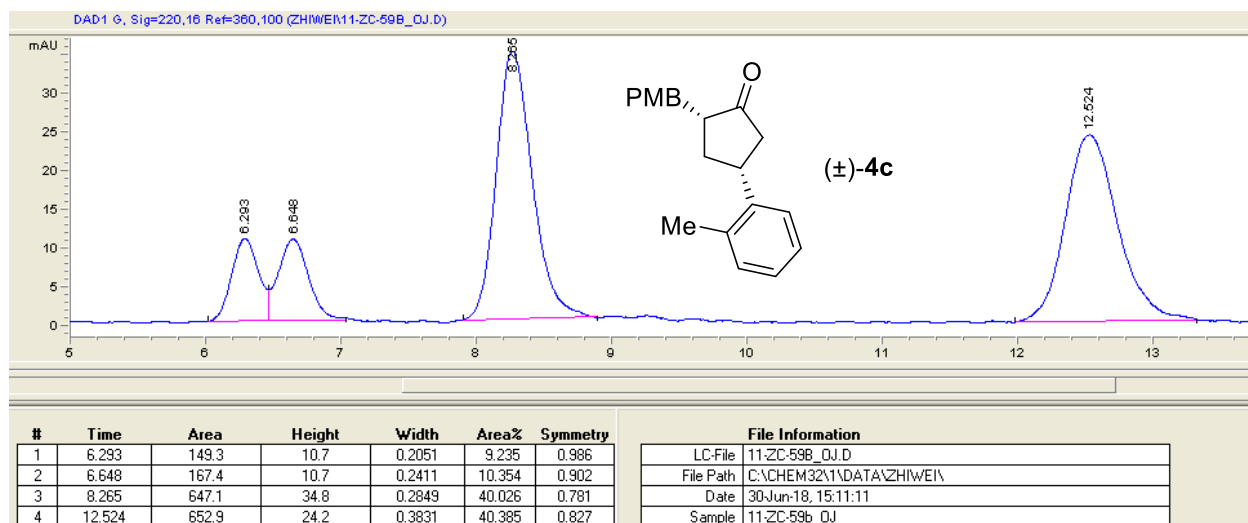

\* peaks at 6.3 and 6.6 min correspond to the *trans* diastereomer that was not separated from the product

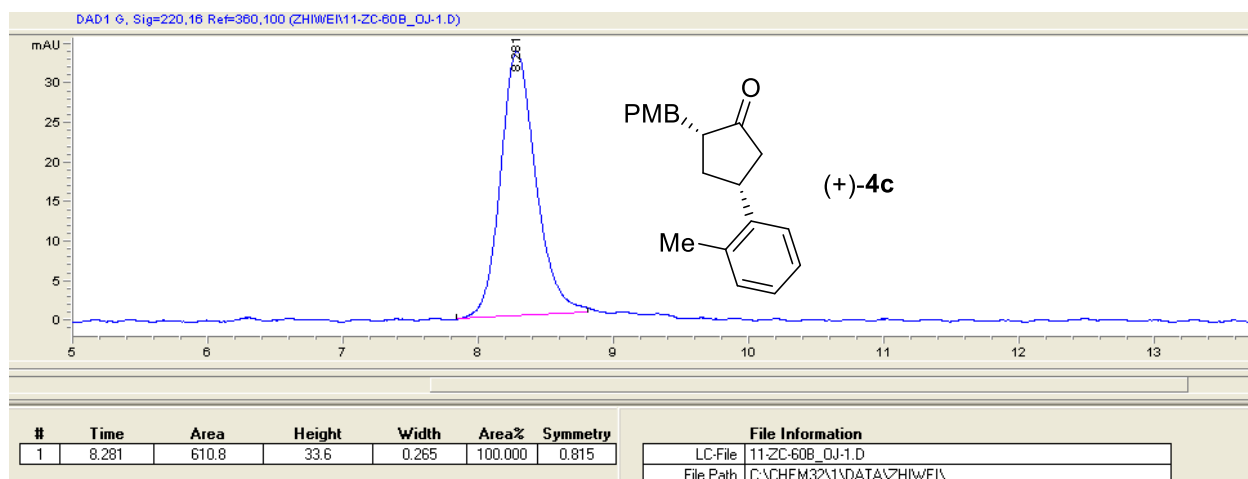

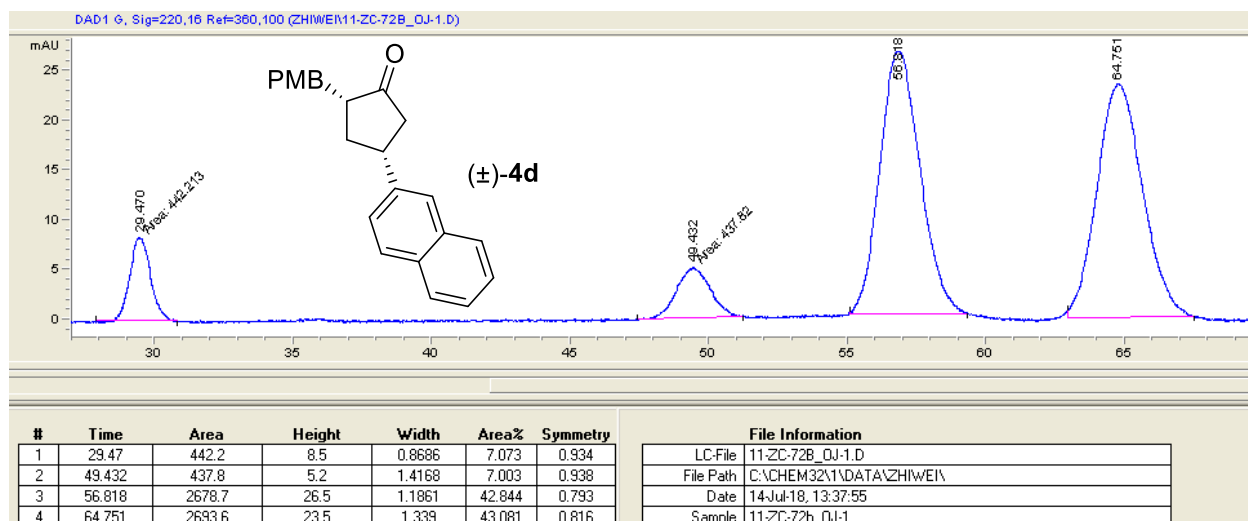

\* peaks at 29.5 and 49.4 min correspond to the *trans* diastereomer that was not separated from the product

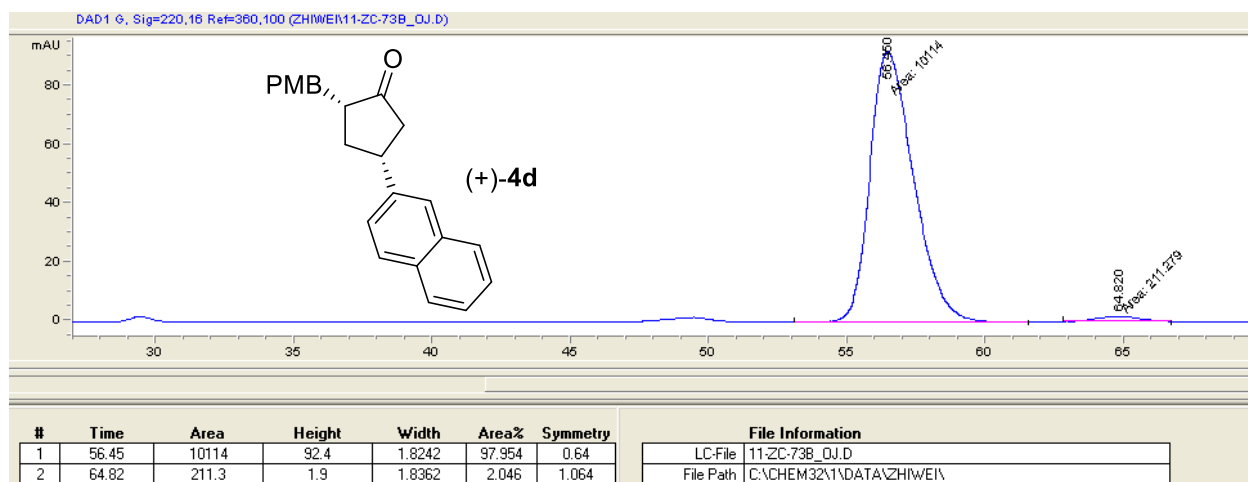

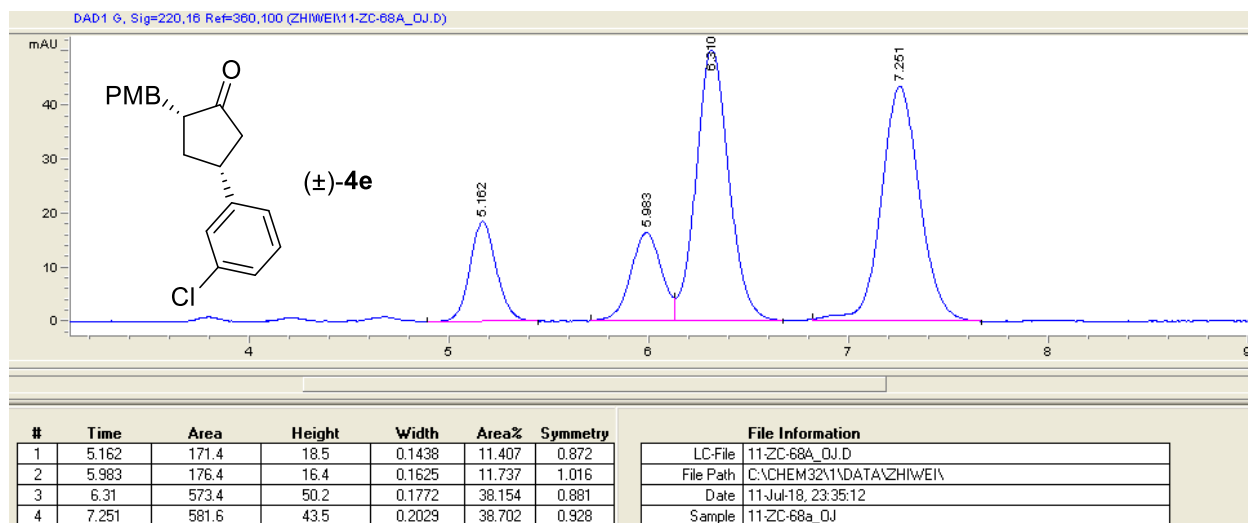

\* peaks at 5.2 and 6.0 min correspond to the *trans* diastereomer that was not separated from the product

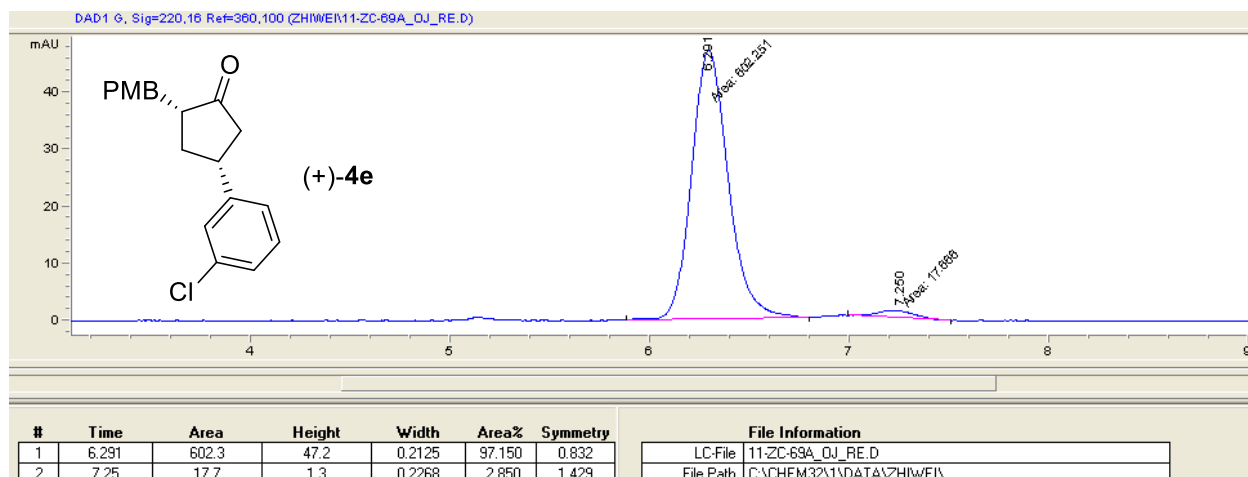

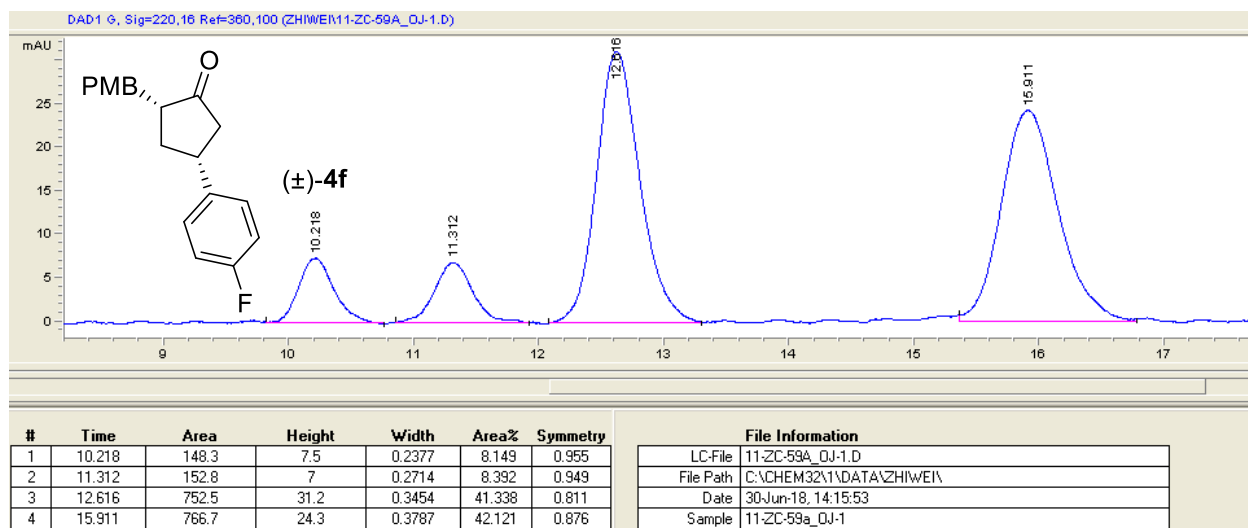

\* peaks at 10.2 and 11.3 min correspond to the *trans* diastereomer that was not separated from the product

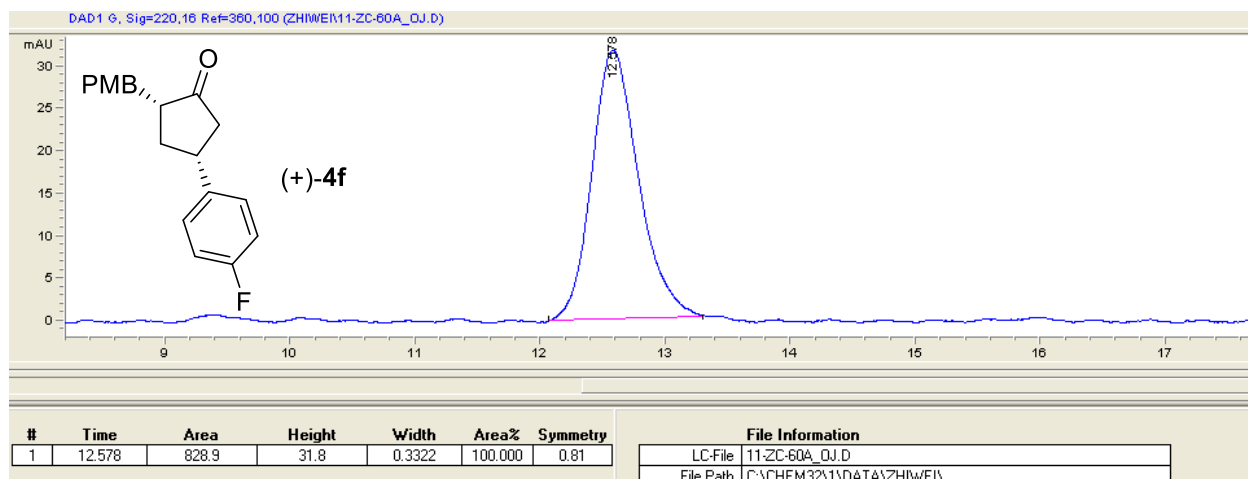

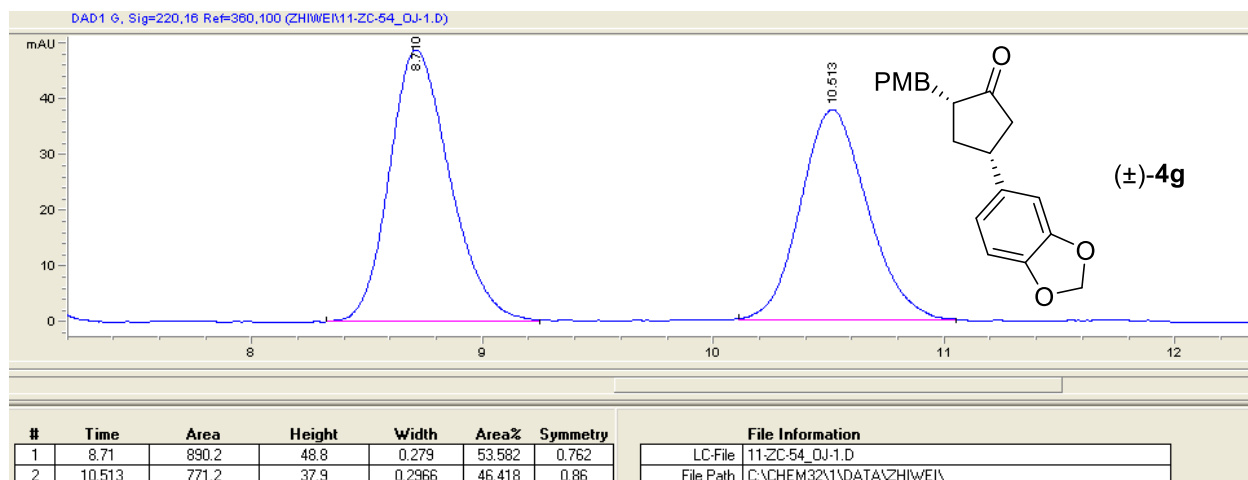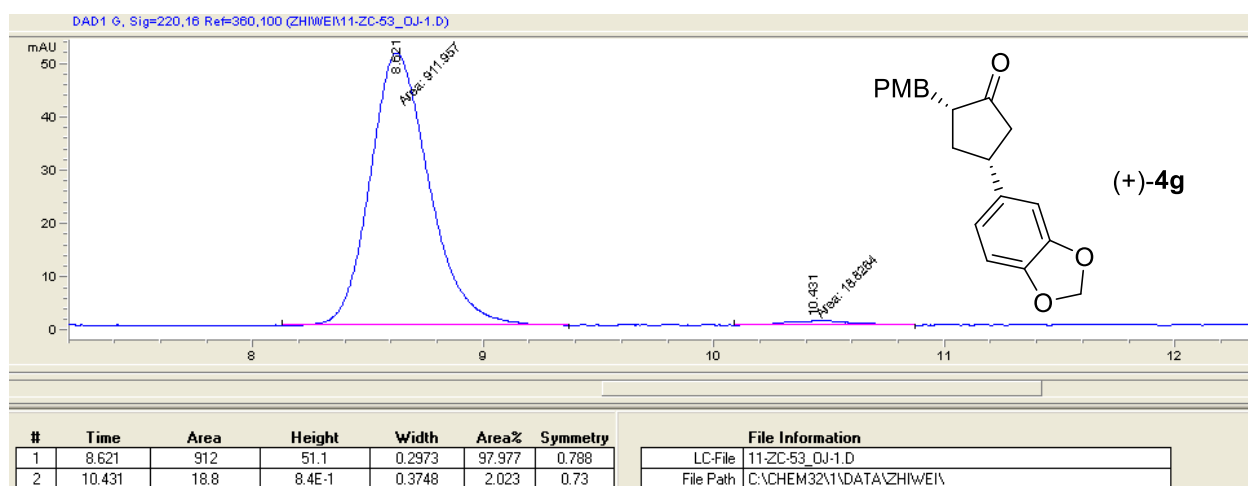

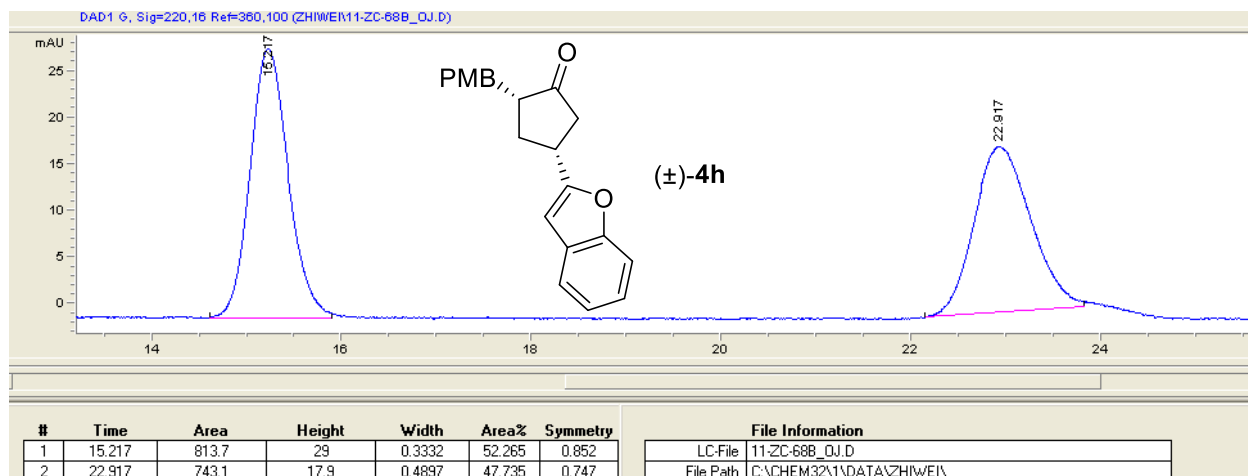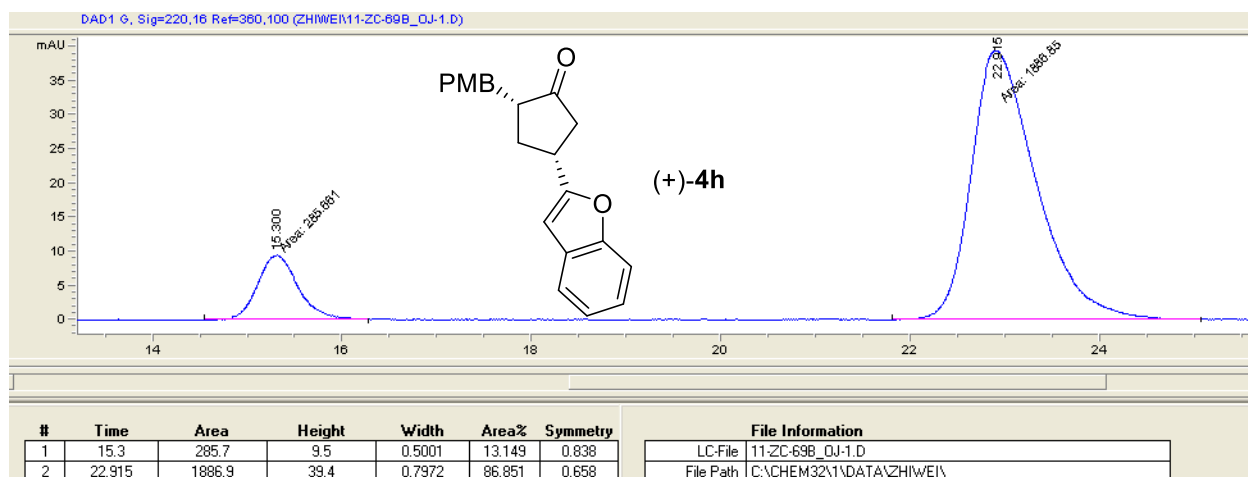

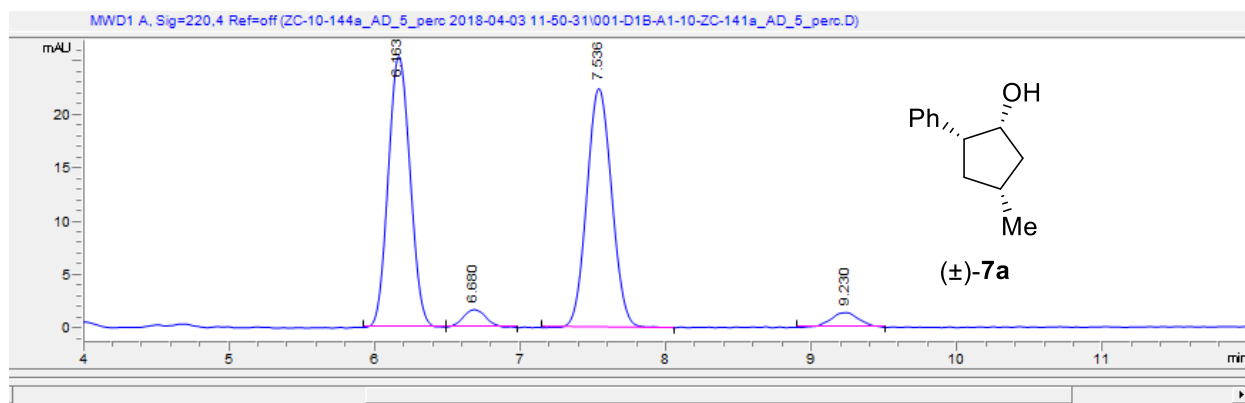

| File Information |                                              | # | Time  | Type | Area  | Height | Width  | Area%  | Symmetry |
|------------------|----------------------------------------------|---|-------|------|-------|--------|--------|--------|----------|
| LC-File          | 001-D1B-A1-10-ZC-141a_AD_5_perc.D            | 1 | 6.163 | BV   | 267.6 | 25.6   | 0.166  | 46.514 | 0.896    |
| File Path        | C:\Chem32\1\Data\ZC-10-144a_AD_5_perc 2018-0 | 2 | 6.68  | VB   | 19.2  | 1.7    | 0.1803 | 3.339  | 0.886    |
| Date             | 03-Apr-18, 11:51:27                          | 3 | 7.536 | BB   | 268.7 | 22.6   | 0.189  | 46.713 | 0.907    |
| Sample           | 10-ZC-141a_AD_5_perc                         | 4 | 9.23  | BB   | 19.8  | 1.4    | 0.2069 | 3.434  | 1.089    |

\* peaks at 6.7 and 9.2 min correspond to another diastereomer that was not separated from the product

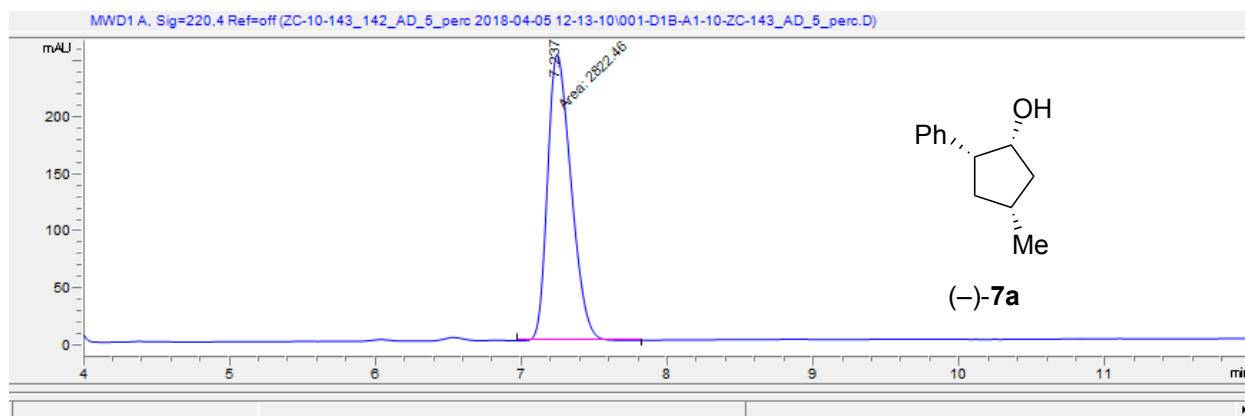

| File Information |                                              | # | Time  | Type | Area   | Height | Width  | Area%   | Symmetry |
|------------------|----------------------------------------------|---|-------|------|--------|--------|--------|---------|----------|
| LC-File          | 001-D1B-A1-10-ZC-143_AD_5_perc.D             | 1 | 7.237 | MM   | 2822.5 | 251.1  | 0.1874 | 100.000 | 0.665    |
| File Path        | C:\Chem32\1\Data\ZC-10-143_142_AD_5_perc 201 |   |       |      |        |        |        |         |          |



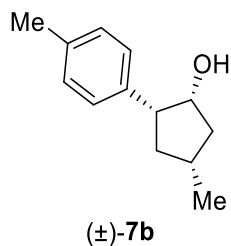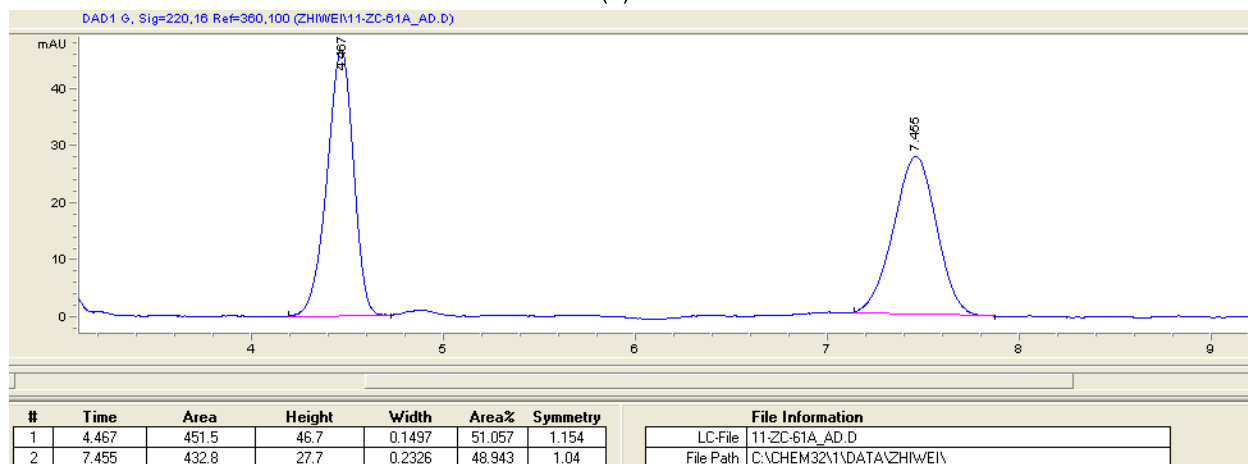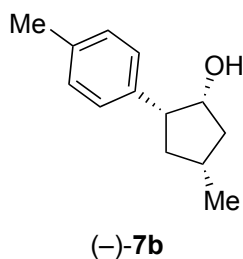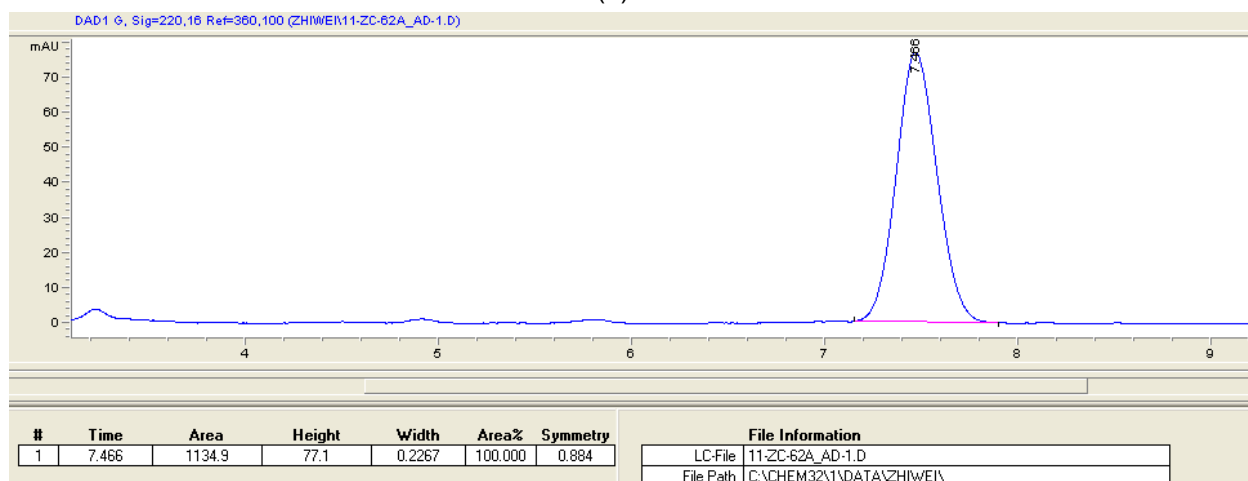

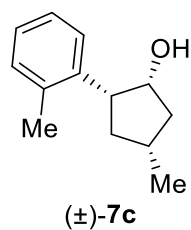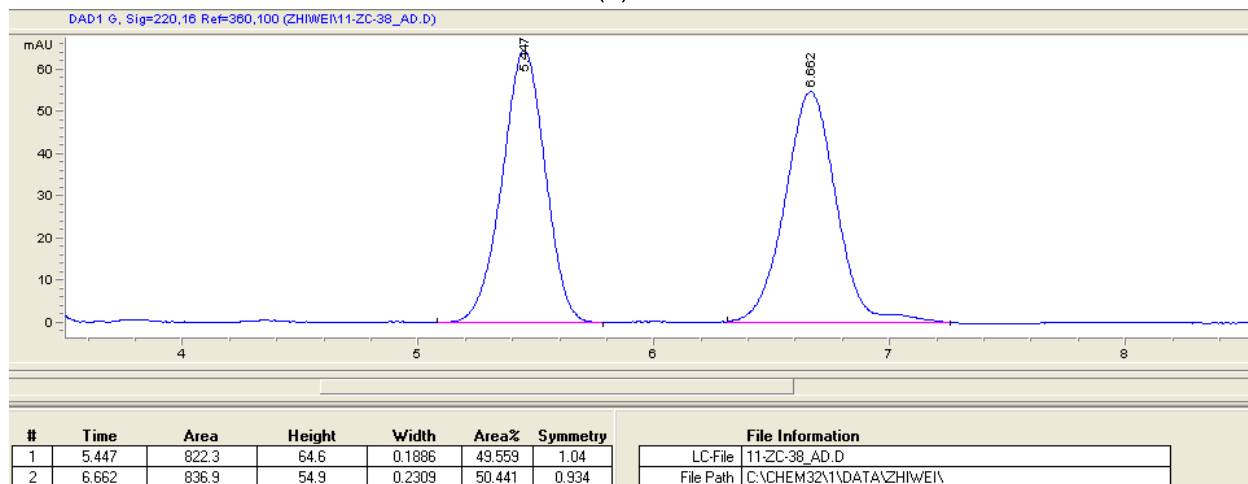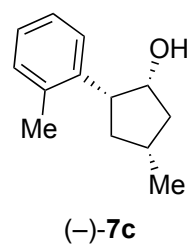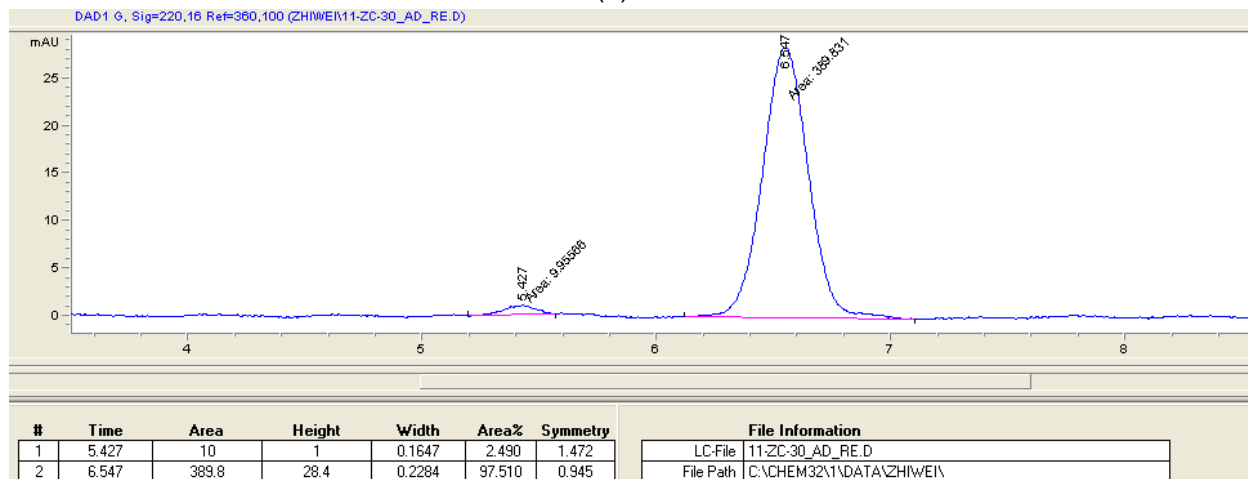

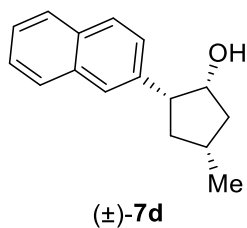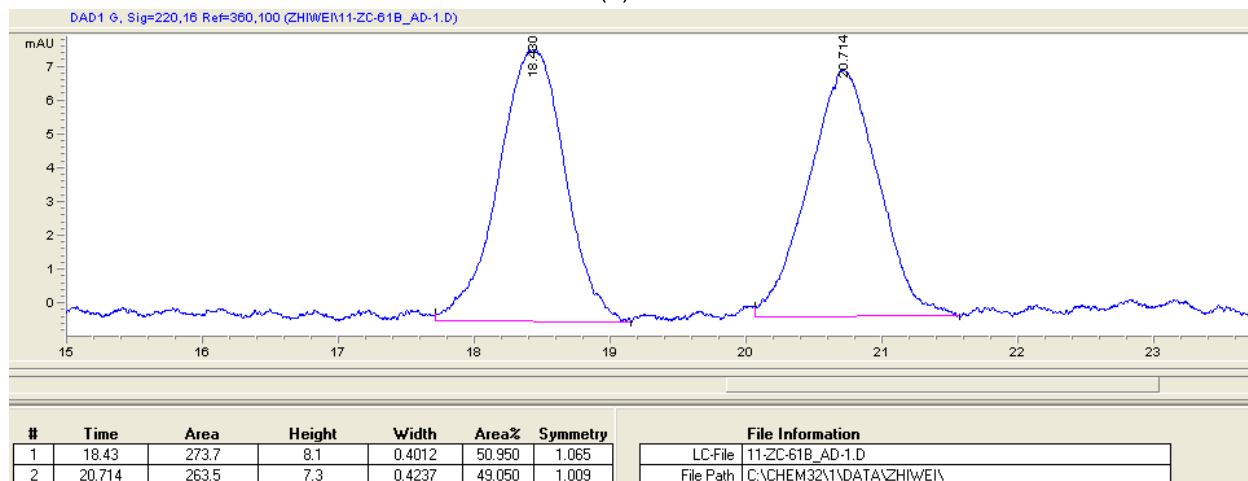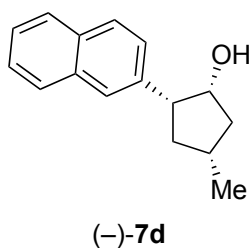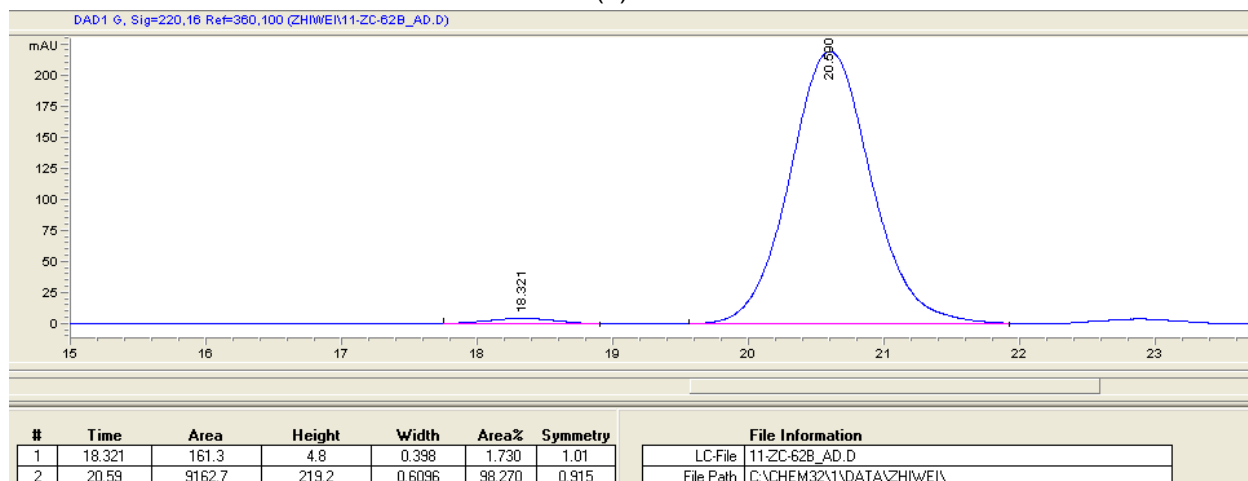

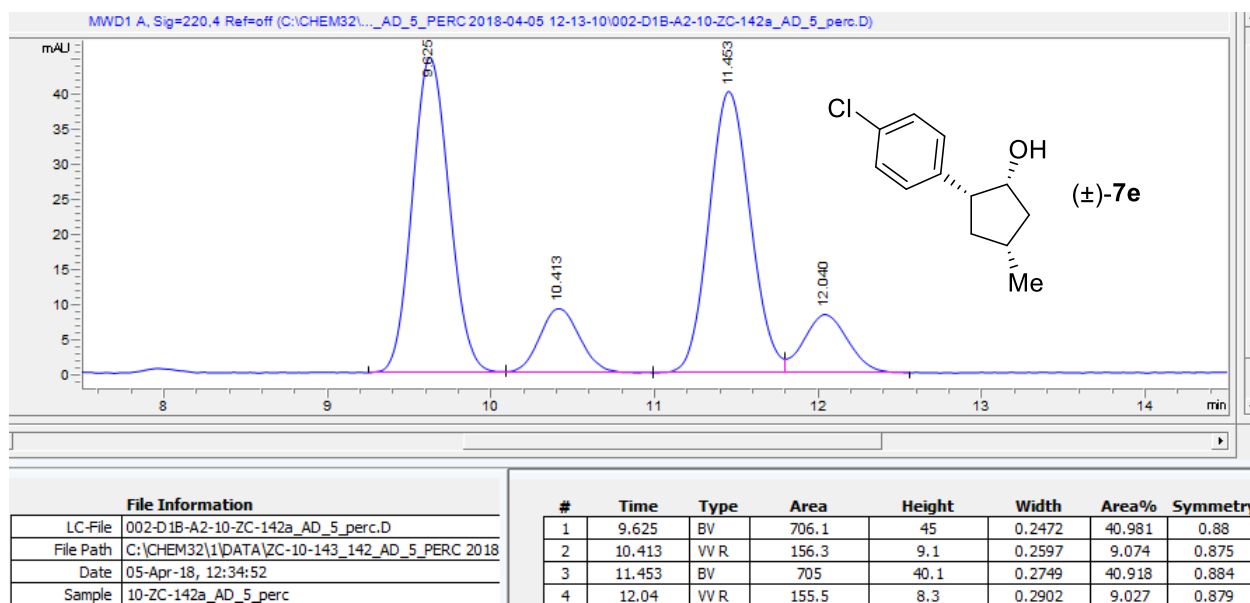

\* peaks at 10.4 and 12.0 min correspond to another diastereomer that was not separated from the product

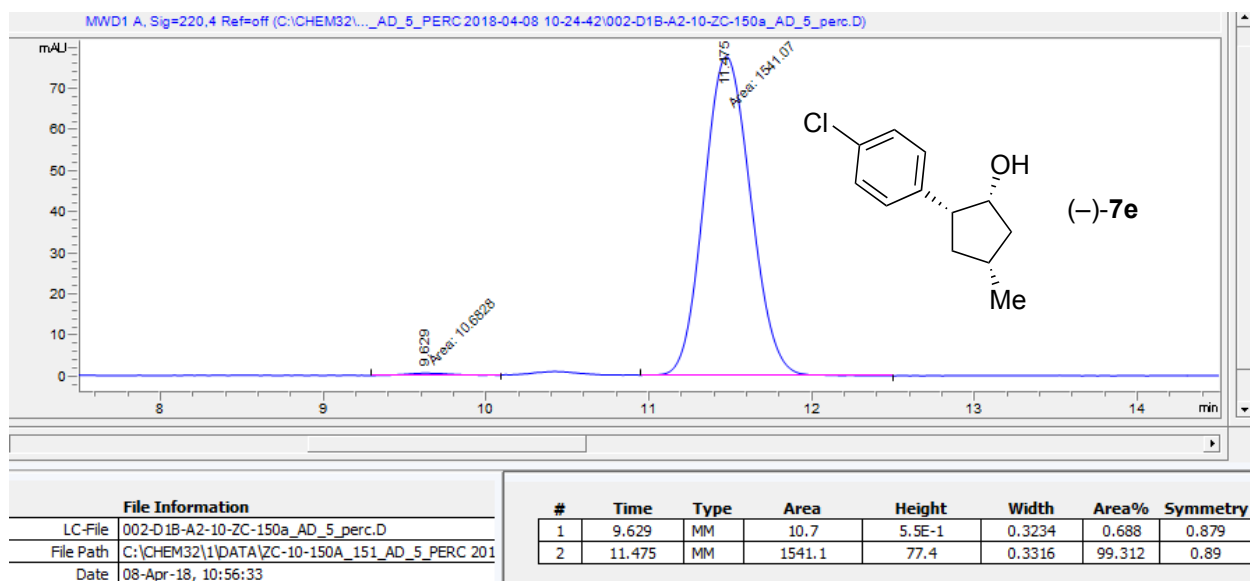

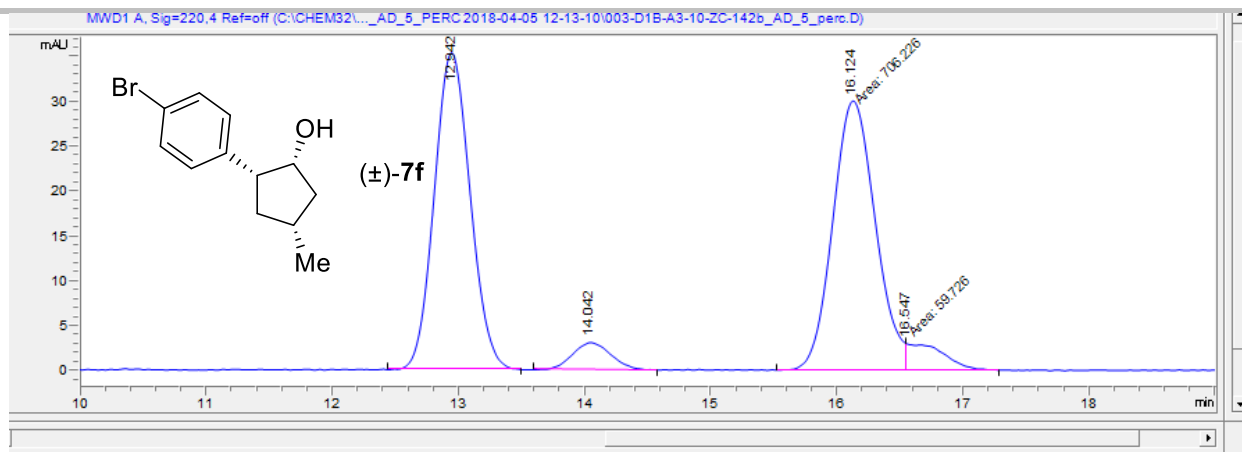

\* peaks at 14.0 and 16.5 min correspond to another diastereomer that was not separated from the product

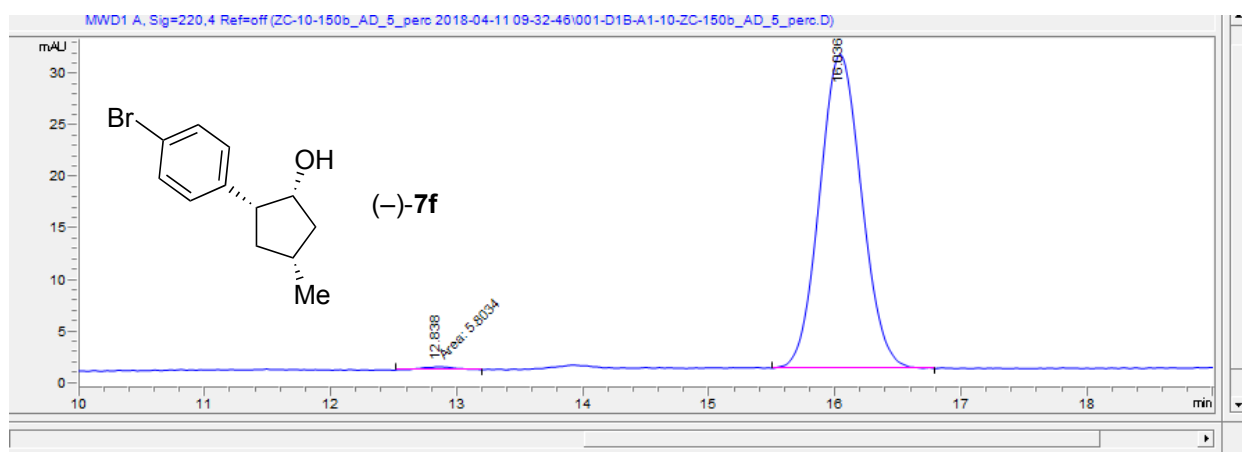

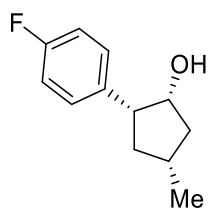

(±)-7g

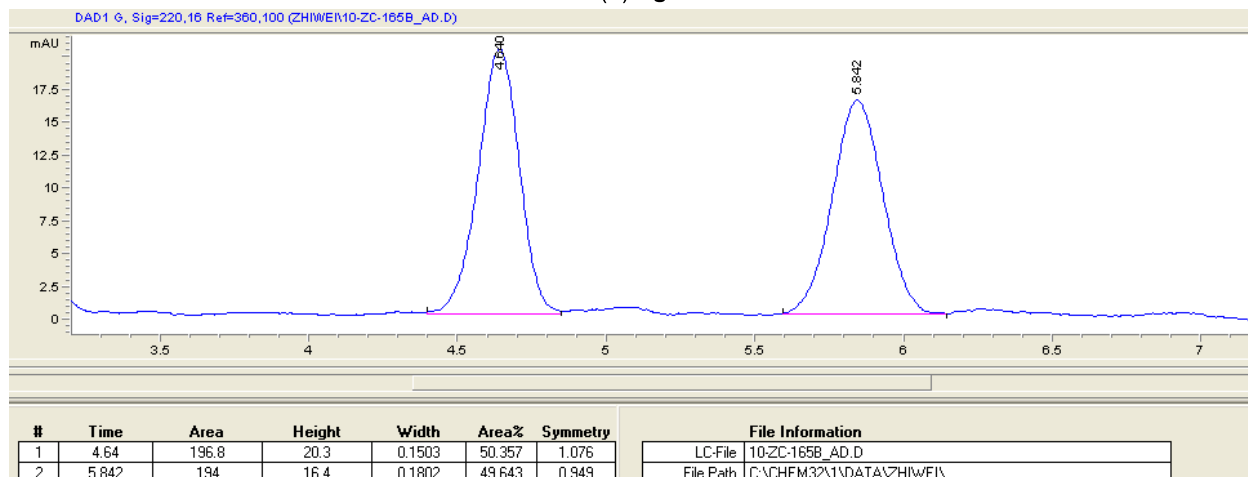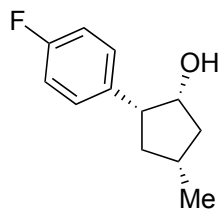

(-)-7g

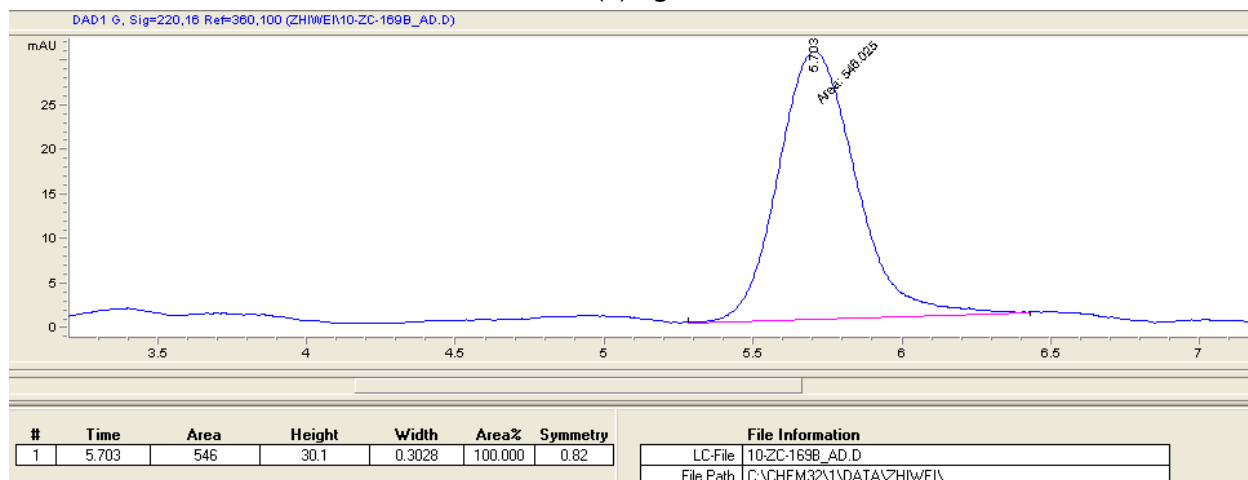

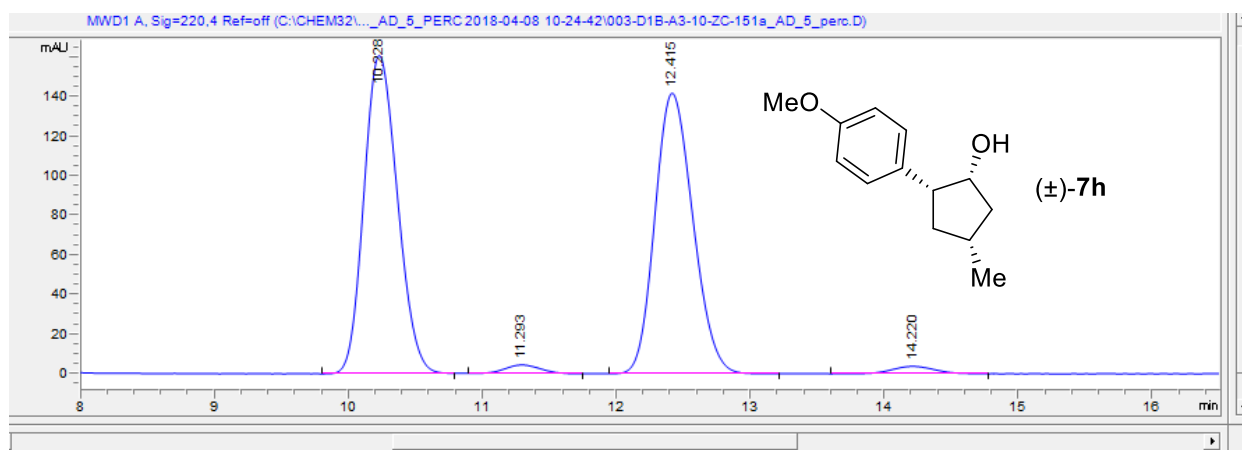

| File Information |                                               | # | Time   | Type | Area   | Height | Width  | Area%  | Symmetry |
|------------------|-----------------------------------------------|---|--------|------|--------|--------|--------|--------|----------|
| LC-File          | 003-D1B-A3-10-ZC-151a_AD_5_perc.D             | 1 | 10.228 | BB   | 2787.3 | 160.4  | 0.2747 | 48.523 | 0.811    |
| File Path        | C:\CHEM32\1\DATA\ZC-10-150A_151_AD_5_PERC 201 | 2 | 11.293 | BB   | 79.5   | 4.3    | 0.2695 | 1.384  | 0.895    |
| Date             | 08-Apr-18, 11:27:26                           | 3 | 12.415 | BV R | 2793   | 141.5  | 0.3063 | 48.622 | 0.8      |
| Sample           | 10-ZC-151a_AD_5_perc                          | 4 | 14.22  | BB   | 84.5   | 3.7    | 0.3152 | 1.471  | 1.013    |

\* peaks at 11.3 and 14.2 min correspond to another diastereomer that was not separated from the product

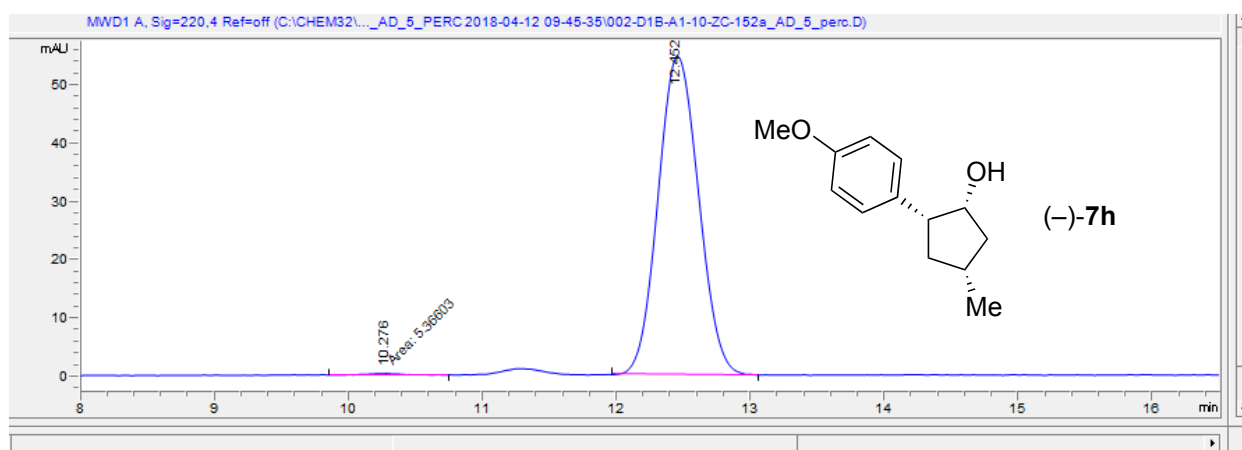

| File Information |                                               | # | Time   | Type | Area   | Height | Width  | Area%  | Symmetry |
|------------------|-----------------------------------------------|---|--------|------|--------|--------|--------|--------|----------|
| LC-File          | 002-D1B-A1-10-ZC-152a_AD_5_perc.D             | 1 | 10.276 | MM   | 5.4    | 2.8E-1 | 0.3155 | 0.465  | 1.099    |
| File Path        | C:\CHEM32\1\DATA\ZC-10-152A_AD_5_PERC 2018-04 | 2 | 12.452 | BB   | 1147.9 | 54.5   | 0.3339 | 99.535 | 0.896    |

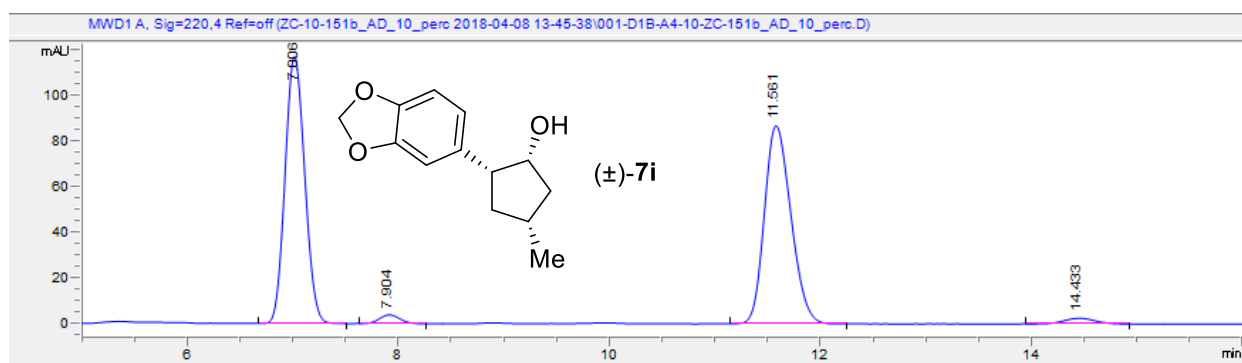

| File Information |                                              | # | Time   | Type | Area   | Height | Width  | Area%  | Symmetry |
|------------------|----------------------------------------------|---|--------|------|--------|--------|--------|--------|----------|
| LC-File          | 001-D1B-A4-10-ZC-151b_AD_10_perc.D           | 1 | 7.006  | BB   | 1509.6 | 117.1  | 0.2044 | 48.359 | 0.879    |
| File Path        | C:\Chem32\1\Data\ZC-10-151b_AD_10_perc 2018- | 2 | 7.904  | BB   | 51.4   | 3.8    | 0.2121 | 1.648  | 0.902    |
| Date             | 08-Apr-18, 13:46:38                          | 3 | 11.561 | BB   | 1509.3 | 86.8   | 0.2728 | 48.349 | 0.755    |
| Sample           | 10-ZC-151b_AD_10_perc                        | 4 | 14.433 | BB   | 51.3   | 2.5    | 0.3042 | 1.645  | 0.978    |

\* peaks at 7.9 and 14.4 min correspond to another diastereomer that was not separated from the product

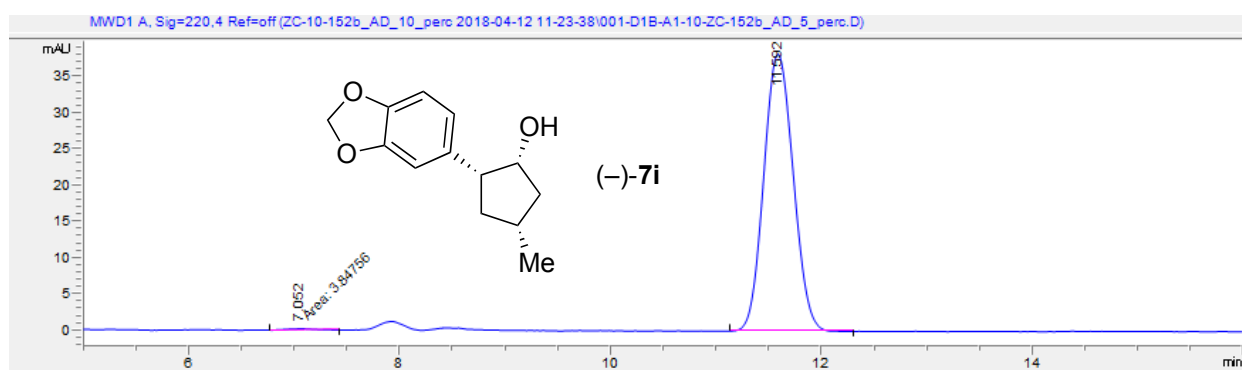

| File Information |                                              | # | Time   | Type | Area  | Height | Width  | Area%  | Symmetry |
|------------------|----------------------------------------------|---|--------|------|-------|--------|--------|--------|----------|
| LC-File          | 001-D1B-A1-10-ZC-152b_AD_5_perc.D            | 1 | 7.052  | MM   | 3.8   | 2.3E-1 | 0.2848 | 0.516  | 0.976    |
| File Path        | C:\Chem32\1\Data\ZC-10-152b_AD_10_perc 2018- | 2 | 11.592 | BB   | 741.7 | 38.1   | 0.3113 | 99.484 | 0.886    |



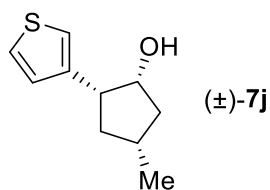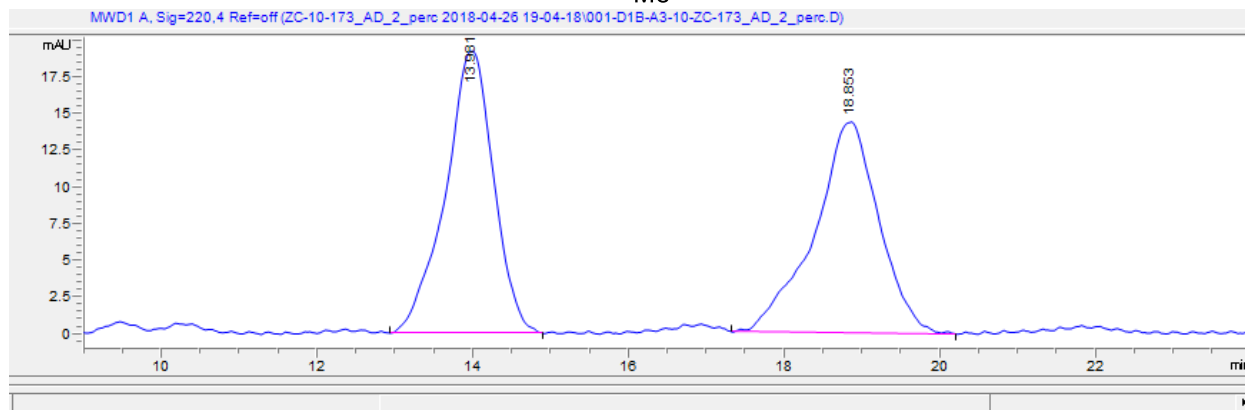

| File Information |                                              | # | Time   | Type | Area  | Height | Width  | Area%  | Symmetry |
|------------------|----------------------------------------------|---|--------|------|-------|--------|--------|--------|----------|
| LC-File          | 001-D1B-A3-10-ZC-173_AD_2_perc.D             | 1 | 13.981 | BV   | 830.2 | 19.2   | 0.5943 | 49.933 | 1.216    |
| File Path        | C:\Chem32\1\Data\ZC-10-173_AD_2_perc 2018-04 | 2 | 18.853 | VVR  | 832.4 | 14.4   | 0.7056 | 50.067 | 1.32     |

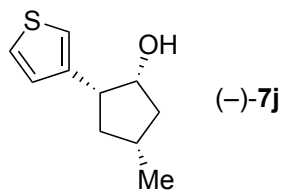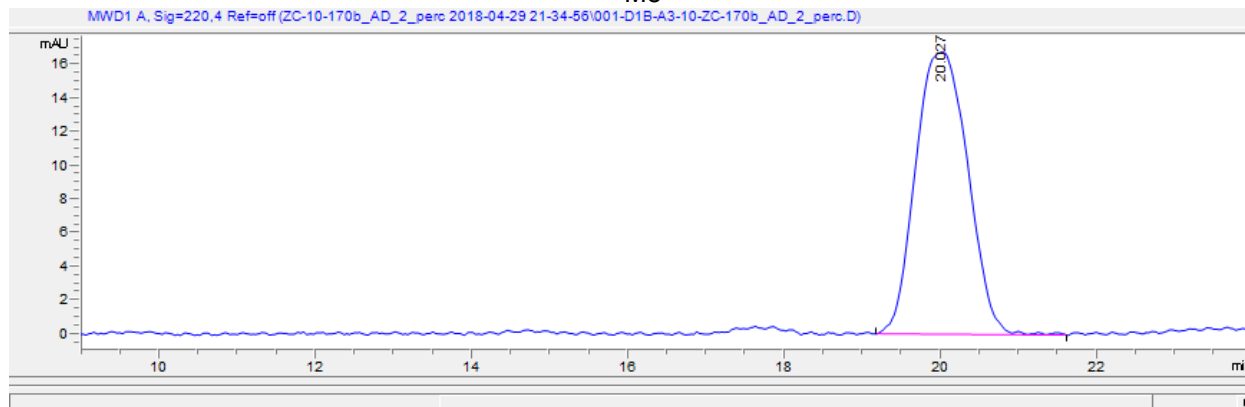

| File Information |                                              | # | Time   | Type | Area  | Height | Width  | Area%   | Symmetry |
|------------------|----------------------------------------------|---|--------|------|-------|--------|--------|---------|----------|
| LC-File          | 001-D1B-A3-10-ZC-170b_AD_2_perc.D            | 1 | 20.027 | BV R | 785.2 | 16.9   | 0.5732 | 100.000 | 1.069    |
| File Path        | C:\Chem32\1\Data\ZC-10-170b_AD_2_perc 2018-0 |   |        |      |       |        |        |         |          |

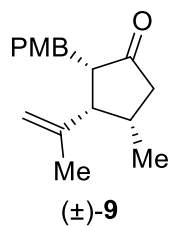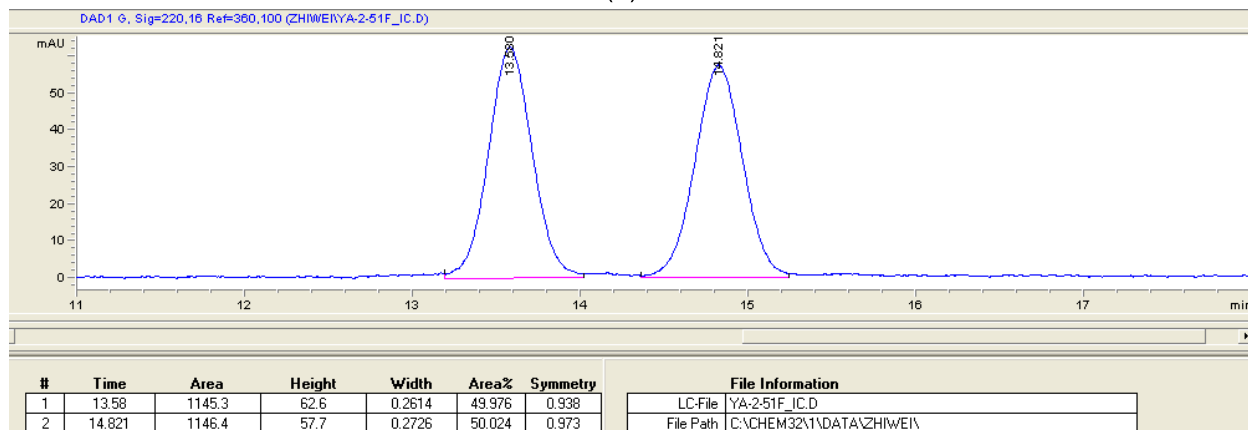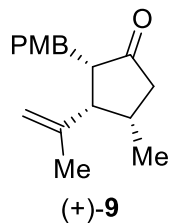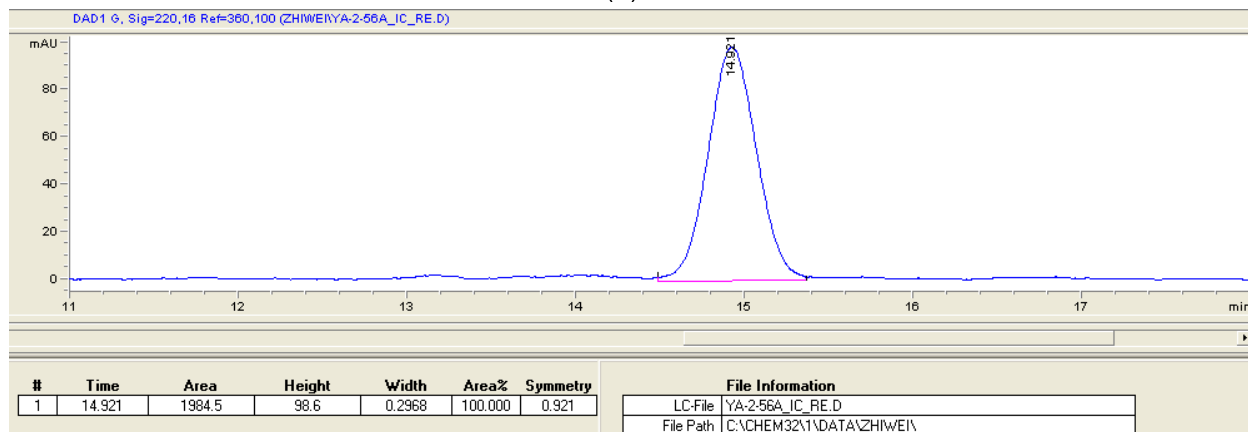

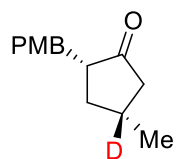**(±)-2a-d**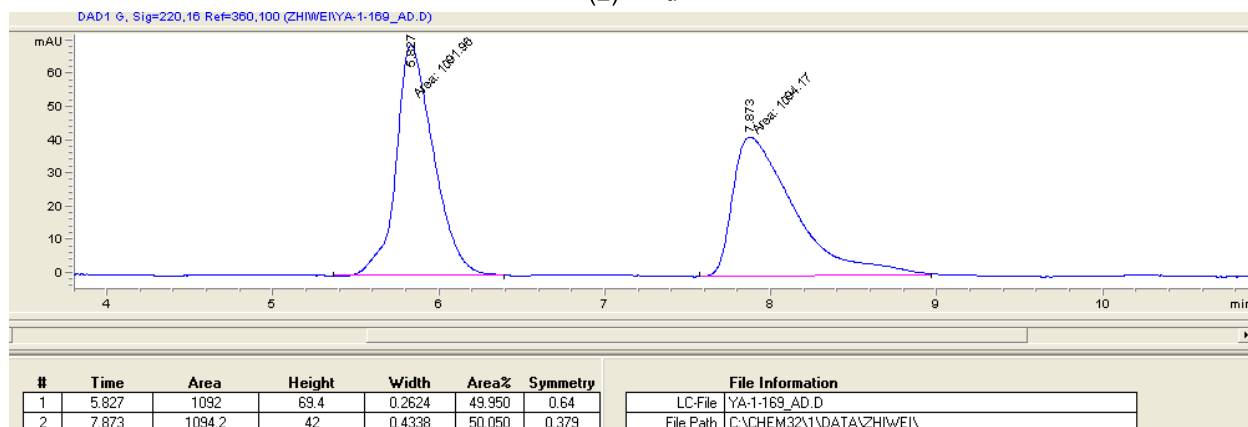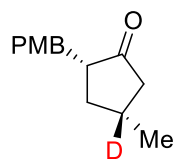**(+)-2a-d**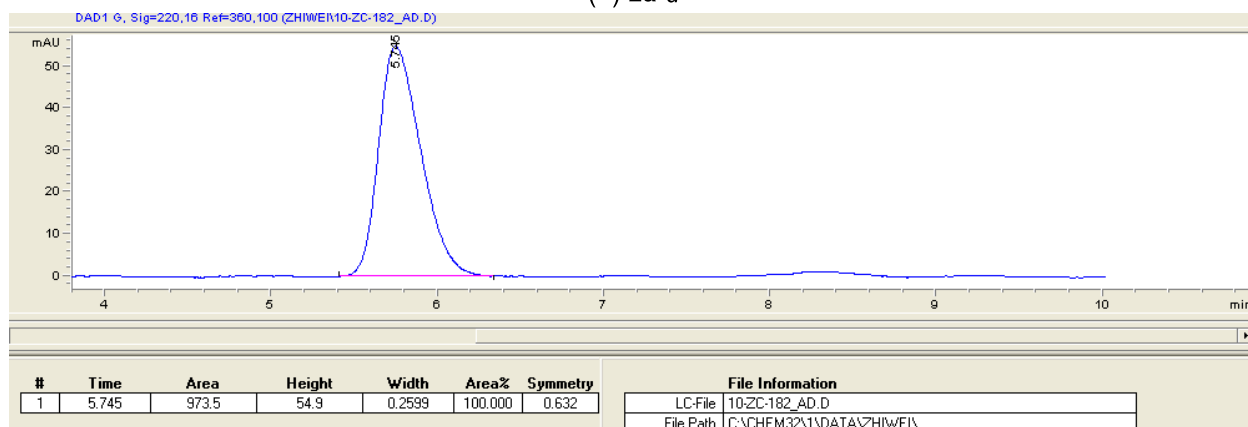

Supplement: NIHMS1018968-supplement-Supp_info.pdf [file NIHMS1018968-supplement-Supp_info.pdf]
